# Supplementary material for: X-ray Co-crystal Structure of a Novel Pseudomonas aeruginosa DXPS Inhibitor Reveals an Unusual Allosteric Binding Pocket
Source: Research Square preprint supplement (doi:10.21203/rs.3.rs-8434964/v1), 2026-04-10

Compound 1

5/2/2022 9:59:07 AM

|                  |                                        |                          |       |
|------------------|----------------------------------------|--------------------------|-------|
| Number of Nuclei | 17 H's / 20 H's (spectrum / structure) | Multiplets Integrals Sum | 17.66 |
|------------------|----------------------------------------|--------------------------|-------|

<sup>1</sup>H NMR (500 MHz, METHANOL-d<sub>4</sub>, ppm) δ= 8.56 (1 H, s), 7.91 (1 H, d, J = 2.44 Hz), 7.46 (1 H, dd, J = 8.77, 2.52 Hz), 7.34 – 7.27 (2 H, m), 7.06 (1 H, d, J = 8.85 Hz), 6.89 – 6.84 (2 H, m), 3.51 – 3.42 (2 H, m), 3.05 (2 H, m), 2.75 – 2.66 (1 H, m), 2.12 – 2.04 (2 H, m), 2.02 – 1.92 (2 H, m);

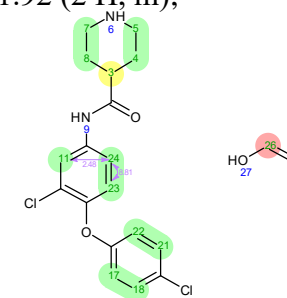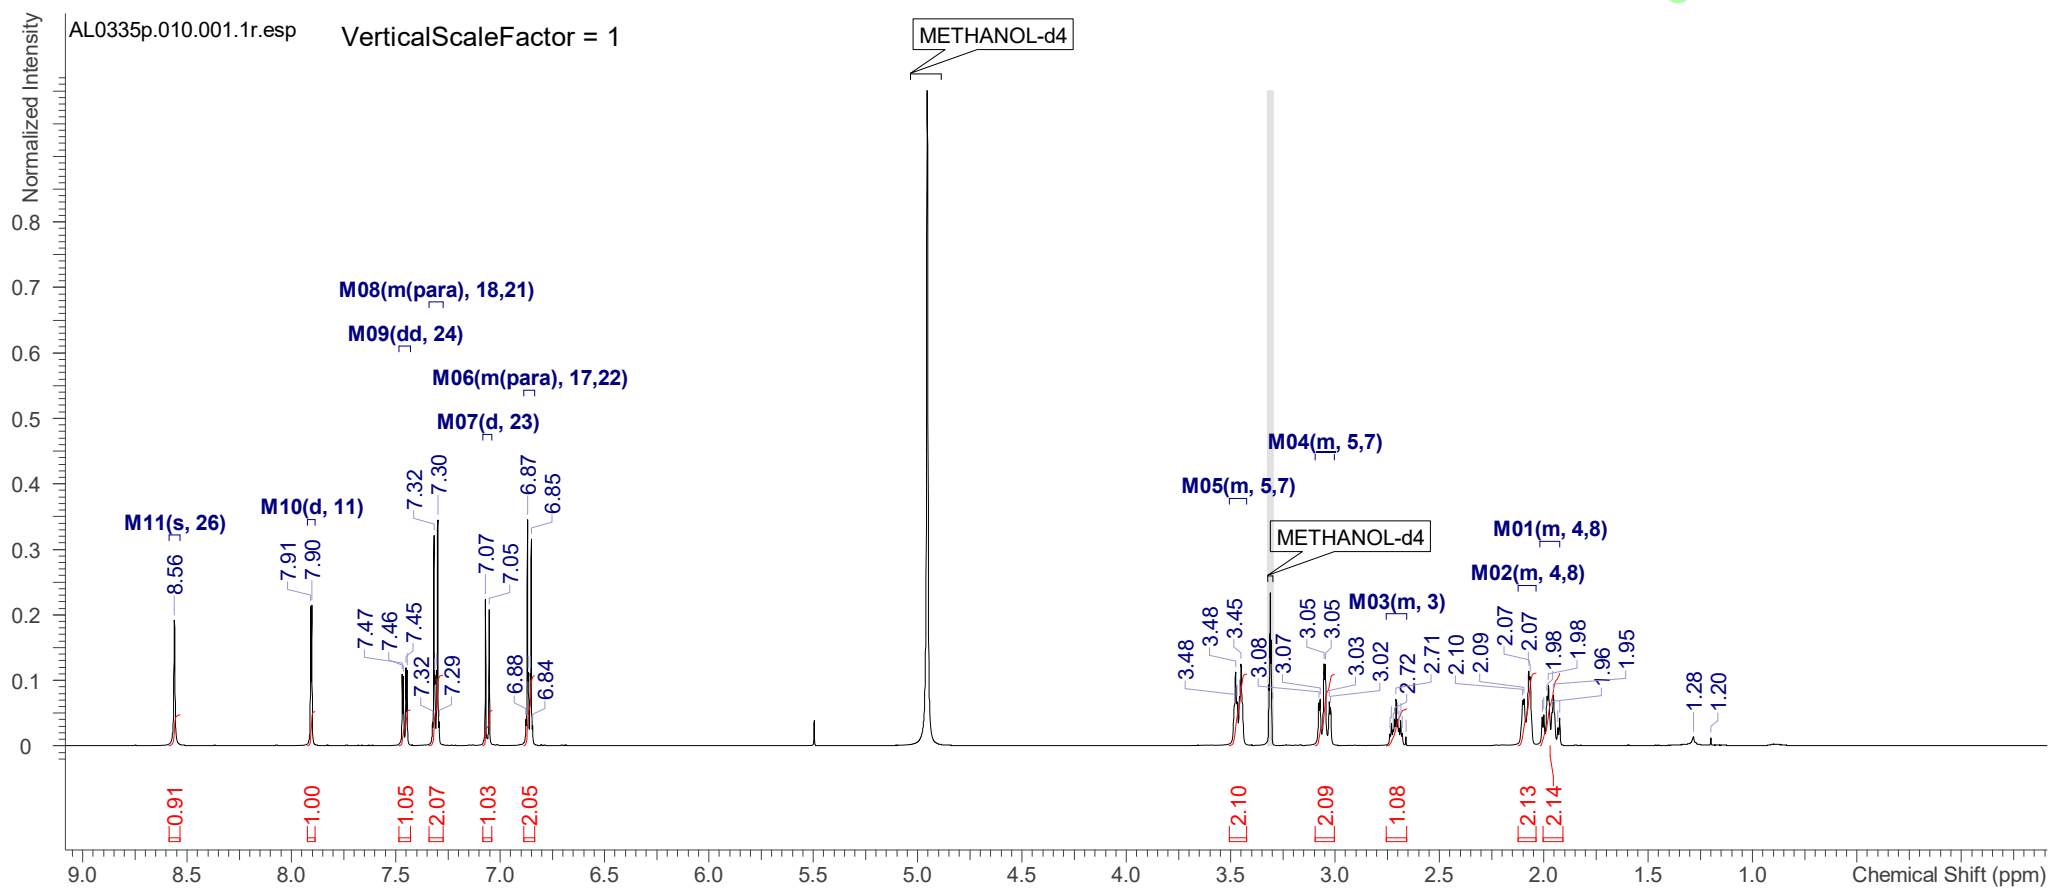

Compound 1

5/2/2022 9:59:13 AM

|                  |                                        |                          |      |
|------------------|----------------------------------------|--------------------------|------|
| Number of Nuclei | 19 C's / 19 C's (spectrum / structure) | Multiplets Integrals Sum | 0.00 |
|------------------|----------------------------------------|--------------------------|------|

<sup>13</sup>C NMR (126 MHz, METHANOL-d<sub>4</sub>, ppm) δ= 174.6 (1 C, s), 170.7 (1 C, s), 158.1 (1 C, s), 149.2 (1 C, s), 137.8 (1 C, s), 131.1 (2 C, s), 129.2 (1 C, s), 127.8 (1 C, s), 123.6 (1 C, s), 123.5 (1 C, s), 121.3 (1 C, s), 119.6 (2 C, s), 44.6 (2 C, s), 42.1 (1 C, s), 27.1 (2 C, s).

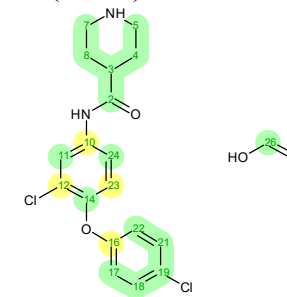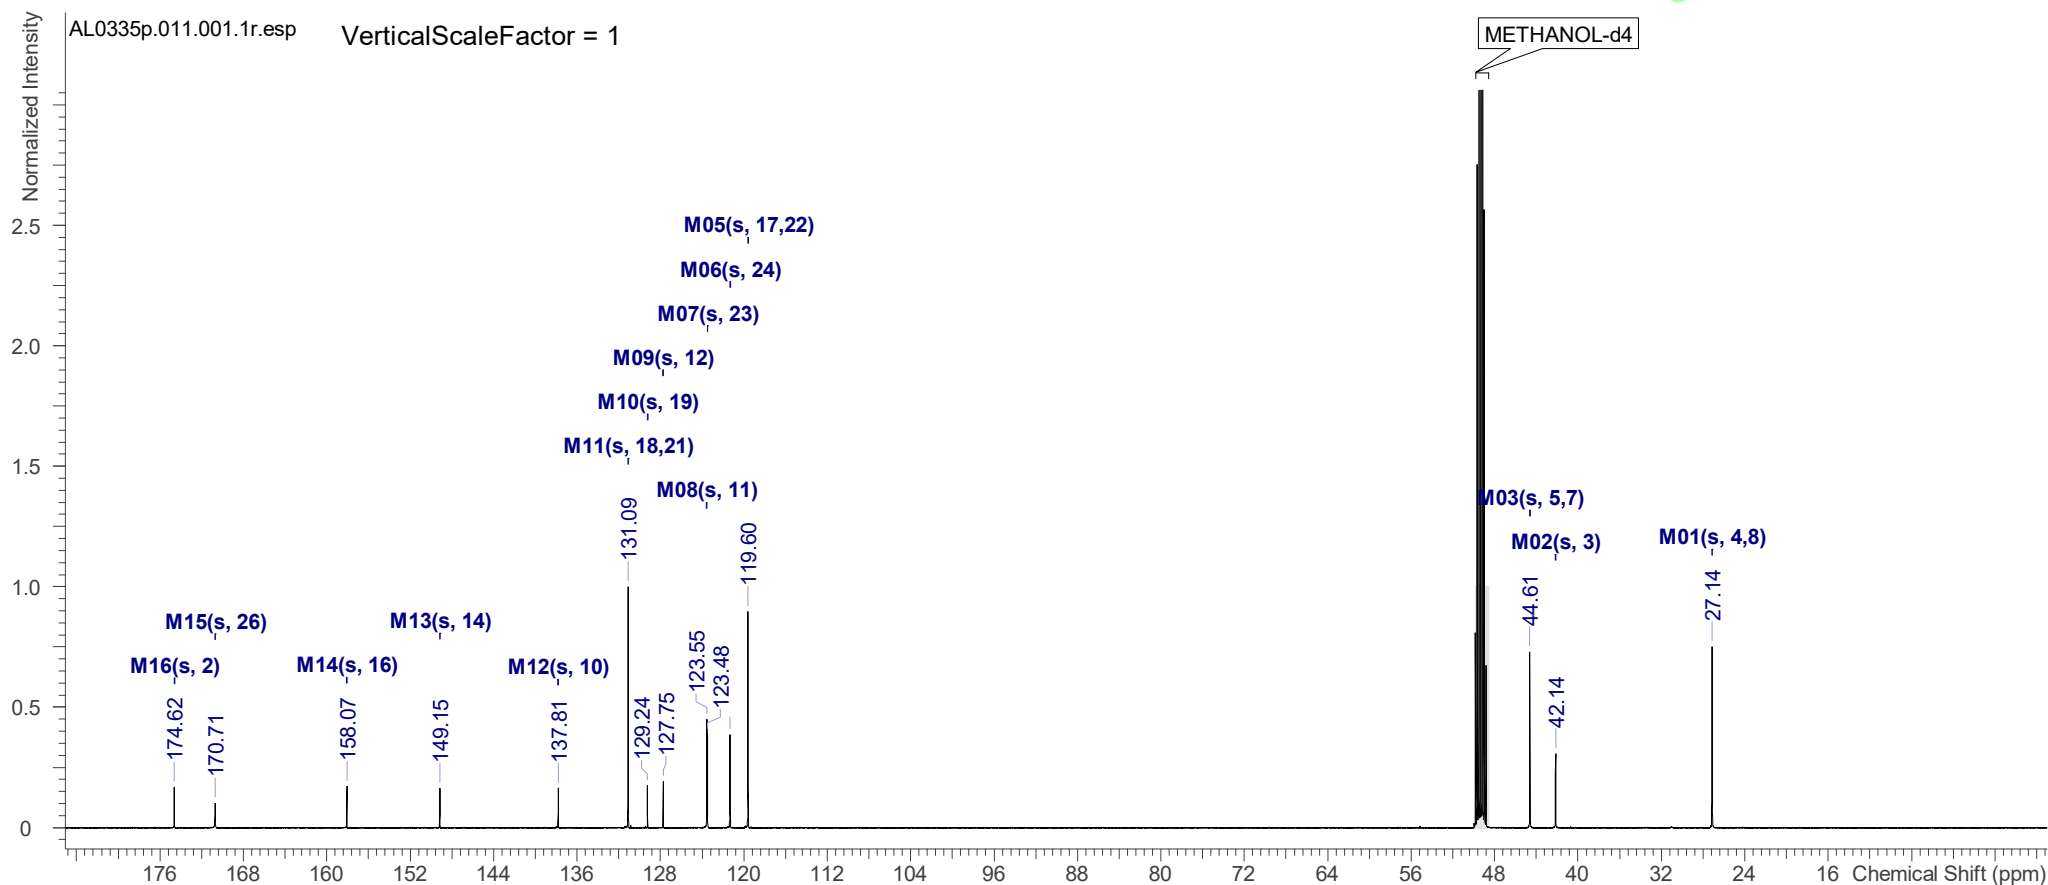

Compound 4a

4/2/2024 8:23:26 AM

|                         |                                      |                                 |      |
|-------------------------|--------------------------------------|---------------------------------|------|
| <b>Number of Nuclei</b> | 7 H's / 7 H's (spectrum / structure) | <b>Multiplets Integrals Sum</b> | 7.52 |
|-------------------------|--------------------------------------|---------------------------------|------|

<sup>1</sup>H NMR (500 MHz, CHLOROFORM-*d*, ppm) δ= 8.31 (1 H, d, J = 2.75 Hz), 8.00 (1 H, dd, J = 9.08, 2.67 Hz), 7.36 – 7.31 (2 H, m), 6.99 – 6.94 (2 H, m), 6.83 (1 H, d, J = 9.16 Hz);

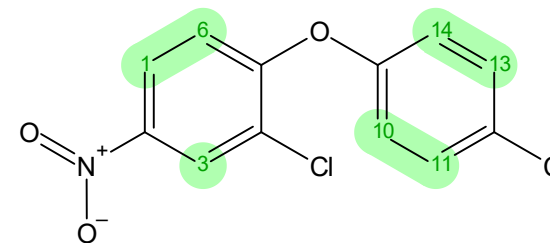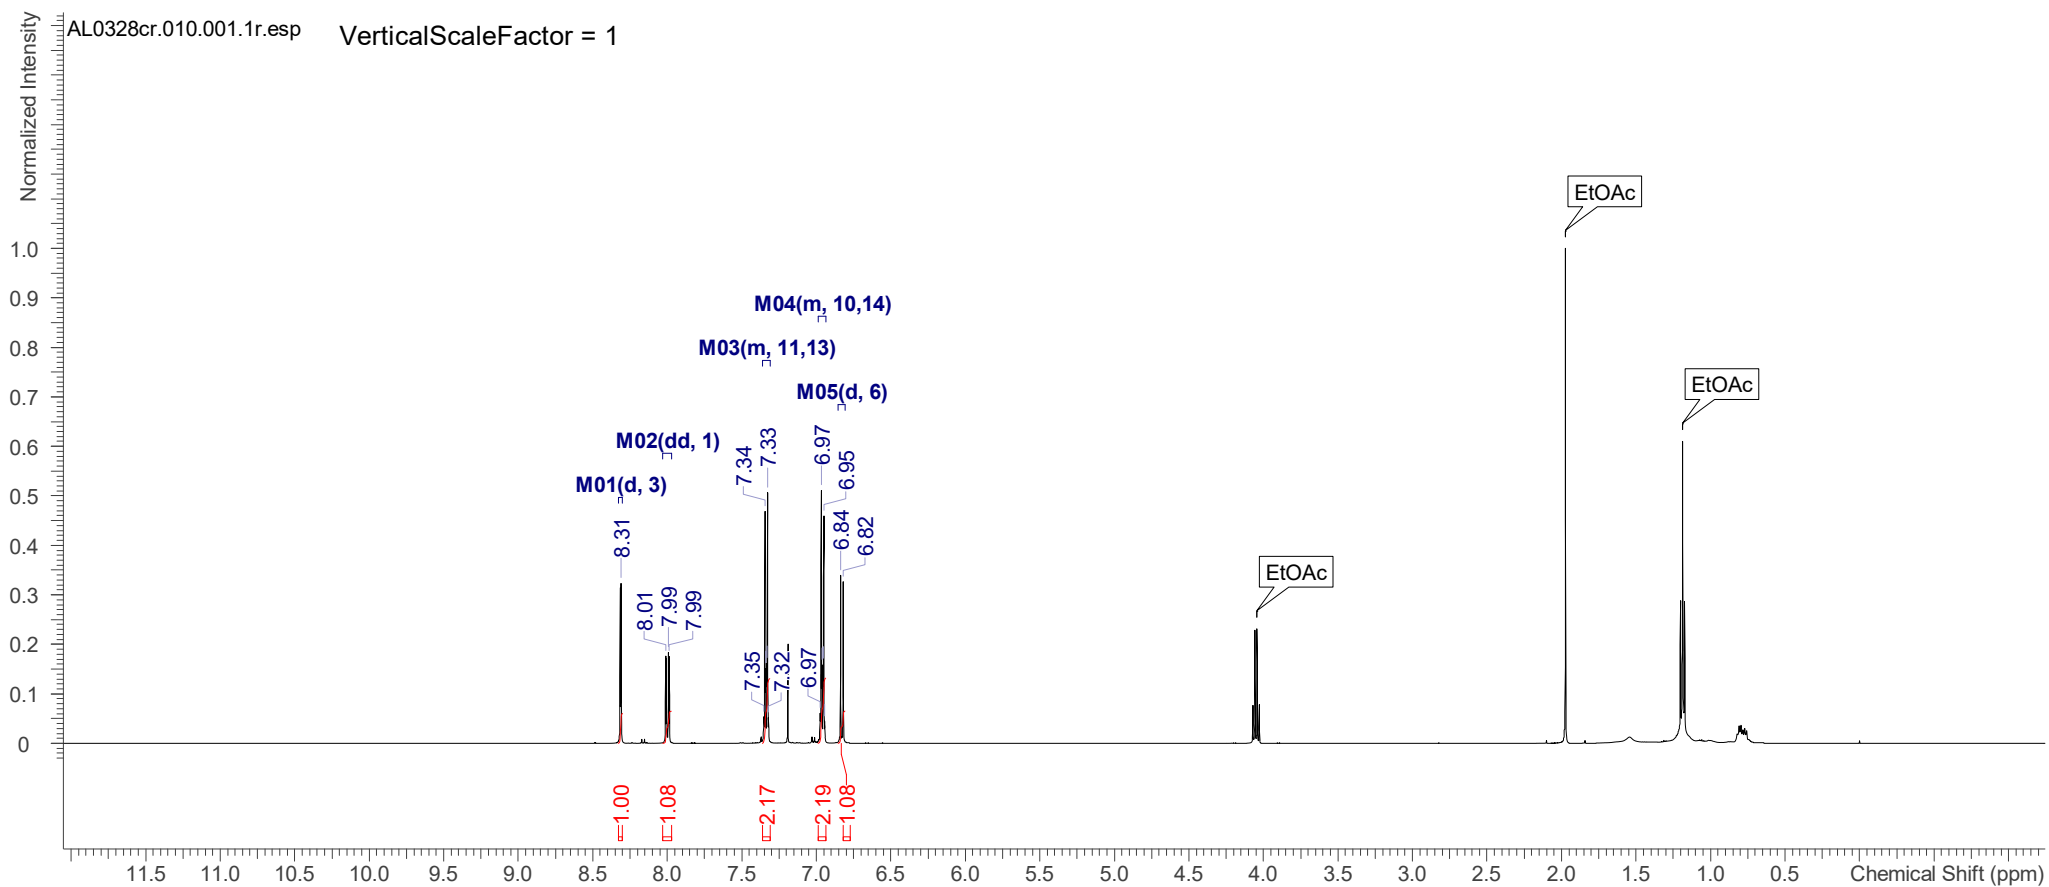

Compound 4a

4/2/2024 8:23:32 AM

|                         |                                        |                                      |
|-------------------------|----------------------------------------|--------------------------------------|
| <b>Number of Nuclei</b> | 12 C's / 12 C's (spectrum / structure) | <b>Multiplets Integrals Sum</b> 0.00 |
|-------------------------|----------------------------------------|--------------------------------------|

<sup>13</sup>C NMR (126 MHz, CHLOROFORM-d, ppm) δ= 158.5 (1 C, s), 153.2 (1 C, s), 143.0 (1 C, s), 130.9 (1 C, s), 130.5 (2 C, s), 126.7 (1 C, s), 125.0 (1 C, s), 123.7 (1 C, s), 121.3 (2 C, s), 117.1 (1 C, s)

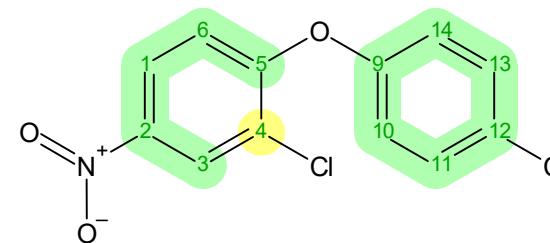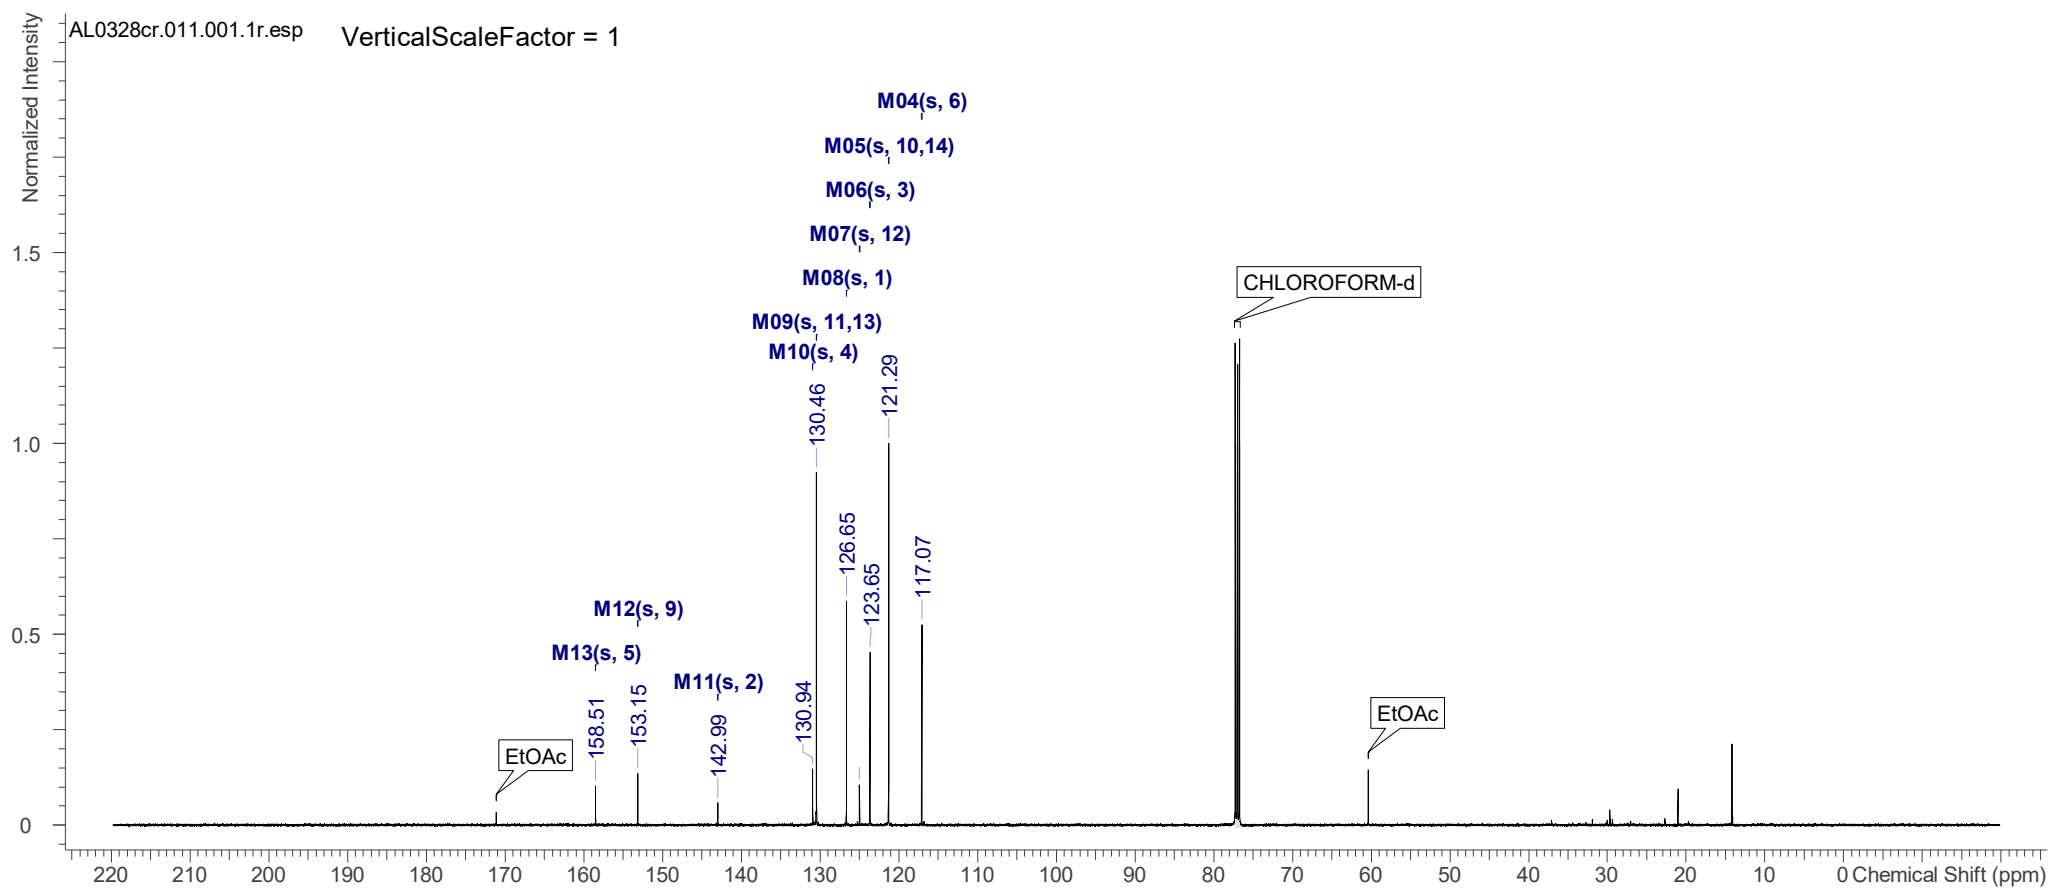

Compound 4b

1/5/2022 10:04:08 AM

|                         |                                      |                                 |      |
|-------------------------|--------------------------------------|---------------------------------|------|
| <b>Number of Nuclei</b> | 8 H's / 8 H's (spectrum / structure) | <b>Multiplets Integrals Sum</b> | 8.45 |
|-------------------------|--------------------------------------|---------------------------------|------|

<sup>1</sup>H NMR (500 MHz, CHLOROFORM-*d*, ppm) δ= 8.39 (1 H, d, J = 2.59 Hz), 8.06 (1 H, dd, J = 9.08, 2.67 Hz), 7.49 – 7.43 (2 H, m), 7.29 (1 H, t, J = 7.40 Hz), 7.10 (2 H, dd, J = 8.54, 0.76 Hz), 6.88 (1 H, d, J = 9.00 Hz);

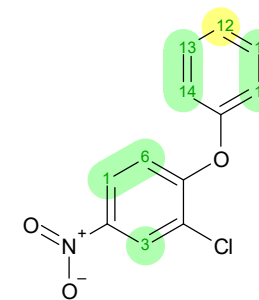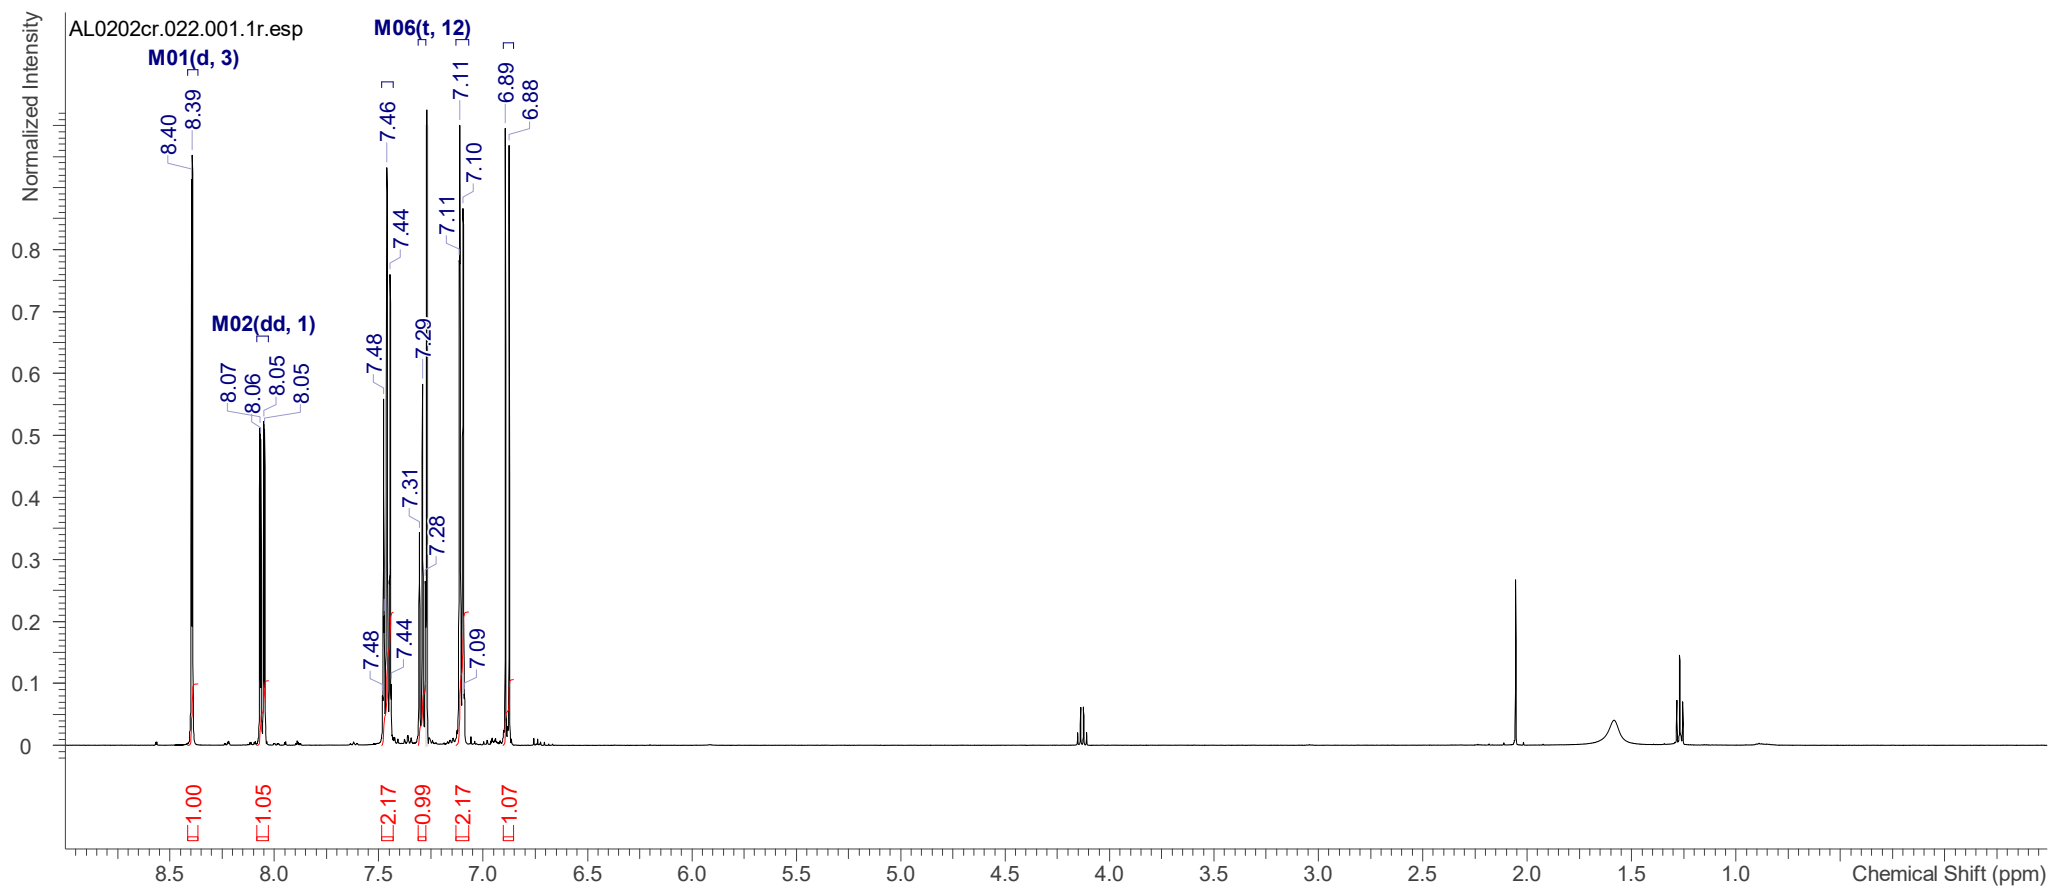

Compound 4b

1/5/2022 10:04:13 AM

|                         |                                        |                                      |
|-------------------------|----------------------------------------|--------------------------------------|
| <b>Number of Nuclei</b> | 12 C's / 12 C's (spectrum / structure) | <b>Multiplets Integrals Sum</b> 9.39 |
|-------------------------|----------------------------------------|--------------------------------------|

<sup>13</sup>C NMR (126 MHz, CHLOROFORM-d, ppm) δ= 159.1 (1 C, s), 154.5 (1 C, s), 142.6 (1 C, s), 130.4 (2 C, s), 126.5 (1 C, s), 125.7 (1 C, s), 124.7 (1 C, s), 123.6 (1 C, s), 120.2 (1 C, s), 116.7 (2 C, s)

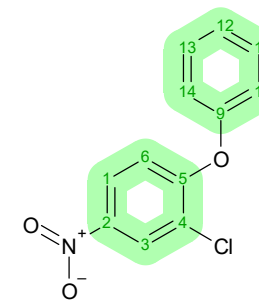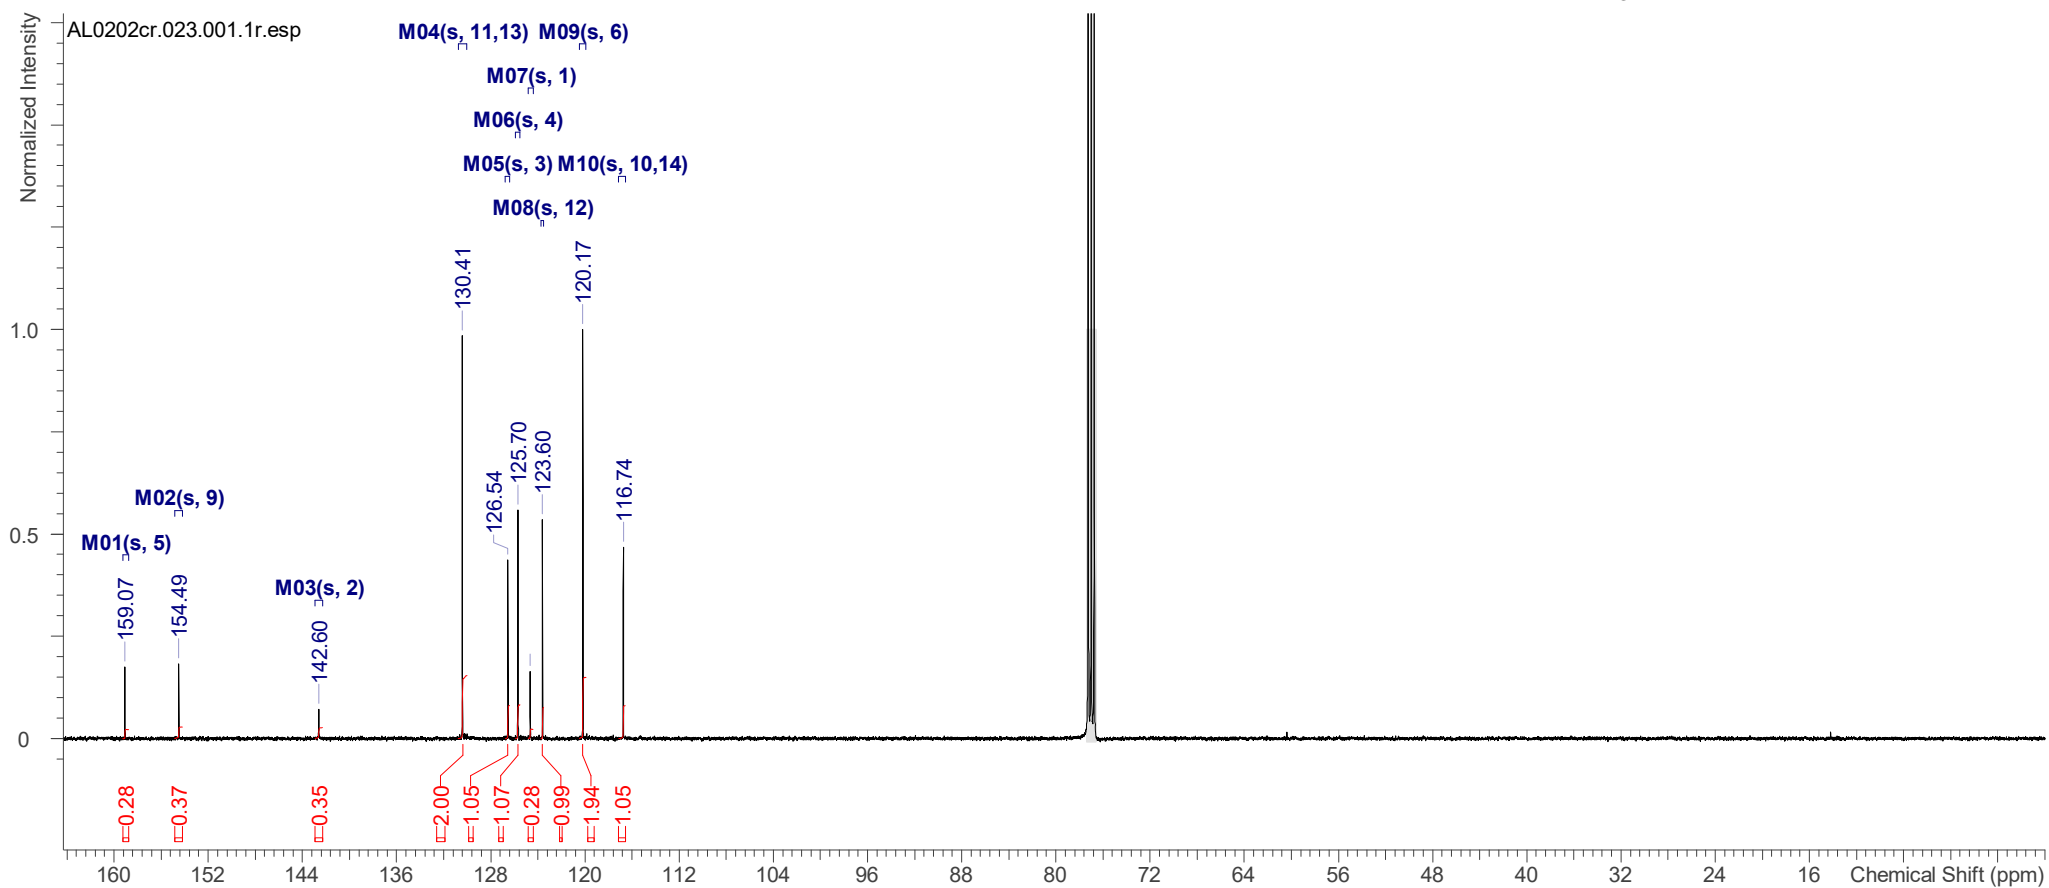

Compound 4c

4/1/2024 5:58:10 PM

|                         |                                      |                                 |      |
|-------------------------|--------------------------------------|---------------------------------|------|
| <b>Number of Nuclei</b> | 9 H's / 9 H's (spectrum / structure) | <b>Multiplets Integrals Sum</b> | 9.45 |
|-------------------------|--------------------------------------|---------------------------------|------|

<sup>1</sup>H NMR (500 MHz, CHLOROFORM-d, ppm) δ= 8.24 – 8.19 (2 H, m), 7.48 – 7.42 (2 H, m), 7.29 – 7.25 (1 H, m), 7.10 (2 H, d, J = 7.78 Hz), 7.05 – 7.00 (2 H, m);

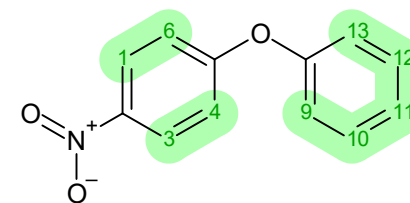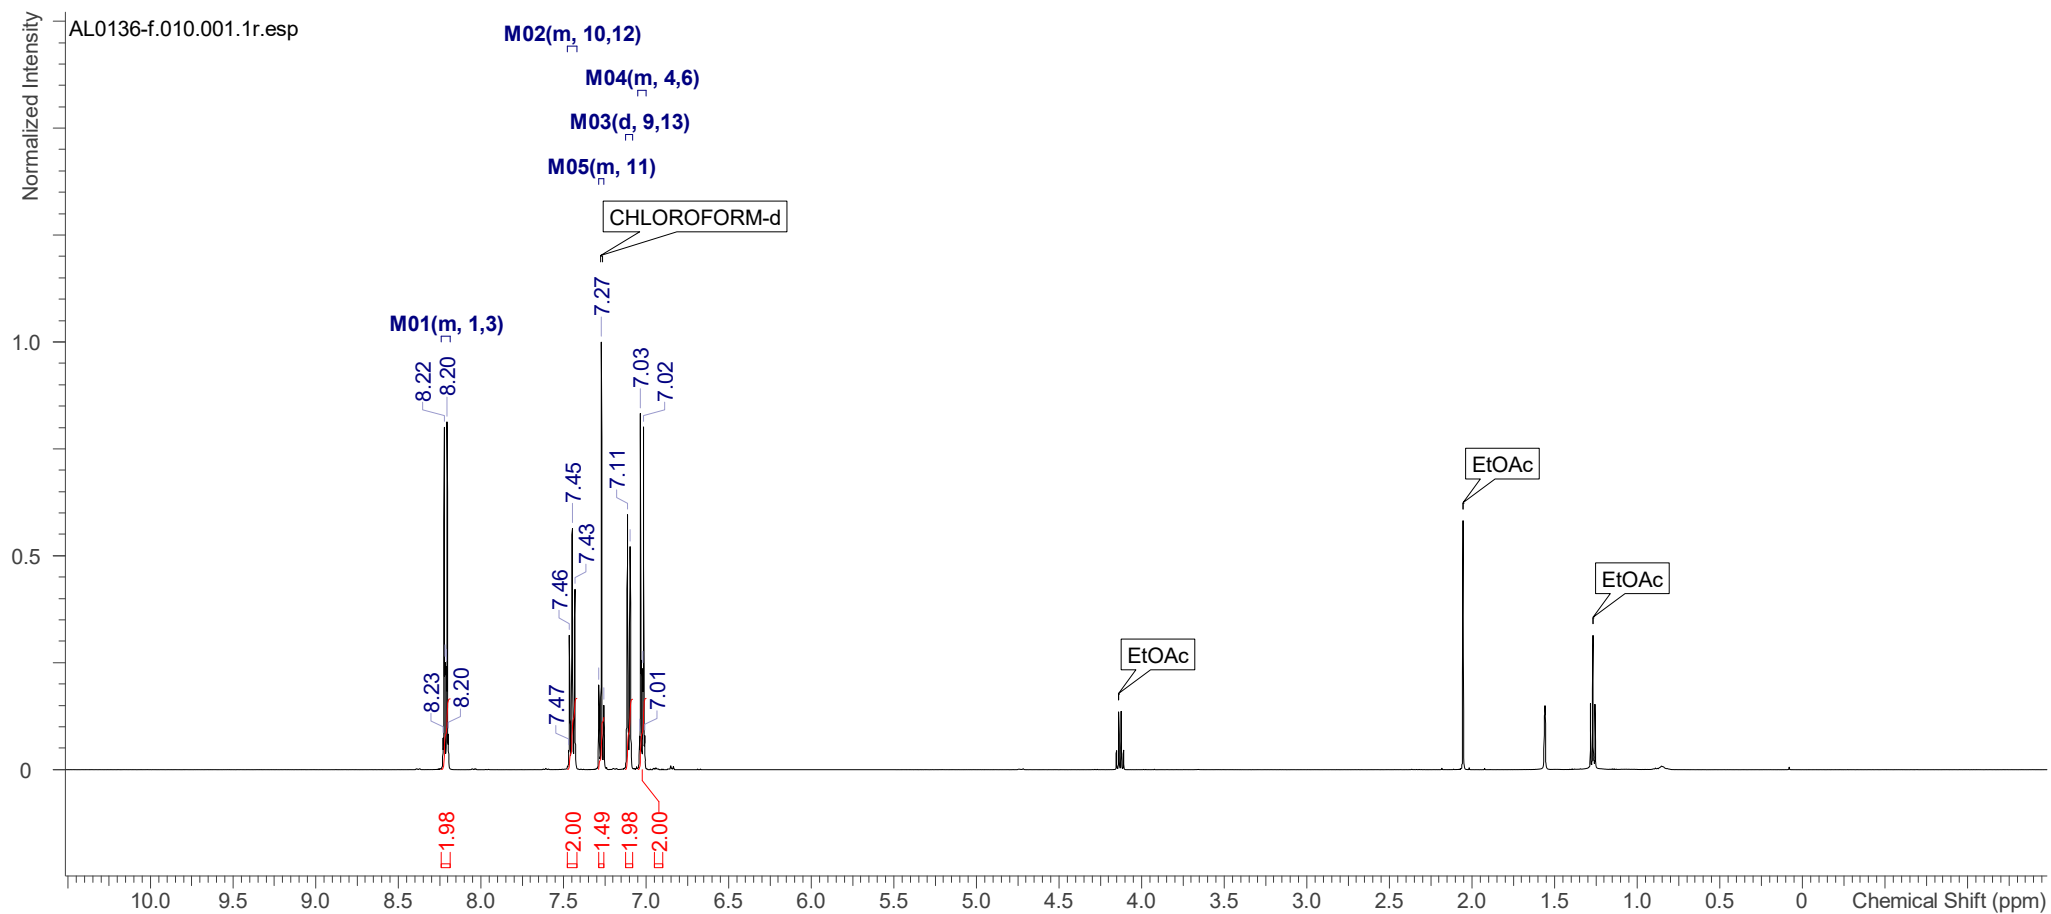

Compound 4c

4/1/2024 5:58:14 PM

|                         |                                        |                                 |      |
|-------------------------|----------------------------------------|---------------------------------|------|
| <b>Number of Nuclei</b> | 12 C's / 12 C's (spectrum / structure) | <b>Multiplets Integrals Sum</b> | 8.10 |
|-------------------------|----------------------------------------|---------------------------------|------|

<sup>13</sup>C NMR (126 MHz, CHLOROFORM-d, ppm) δ= 163.4 (1 C, s), 154.7 (1 C, s), 142.6 (1 C, s), 130.3 (2 C, s), 125.9 (2 C, s), 125.4 (1 C, s), 120.5 (2 C, s), 117.1 (2 C, s)

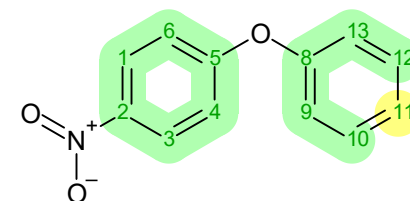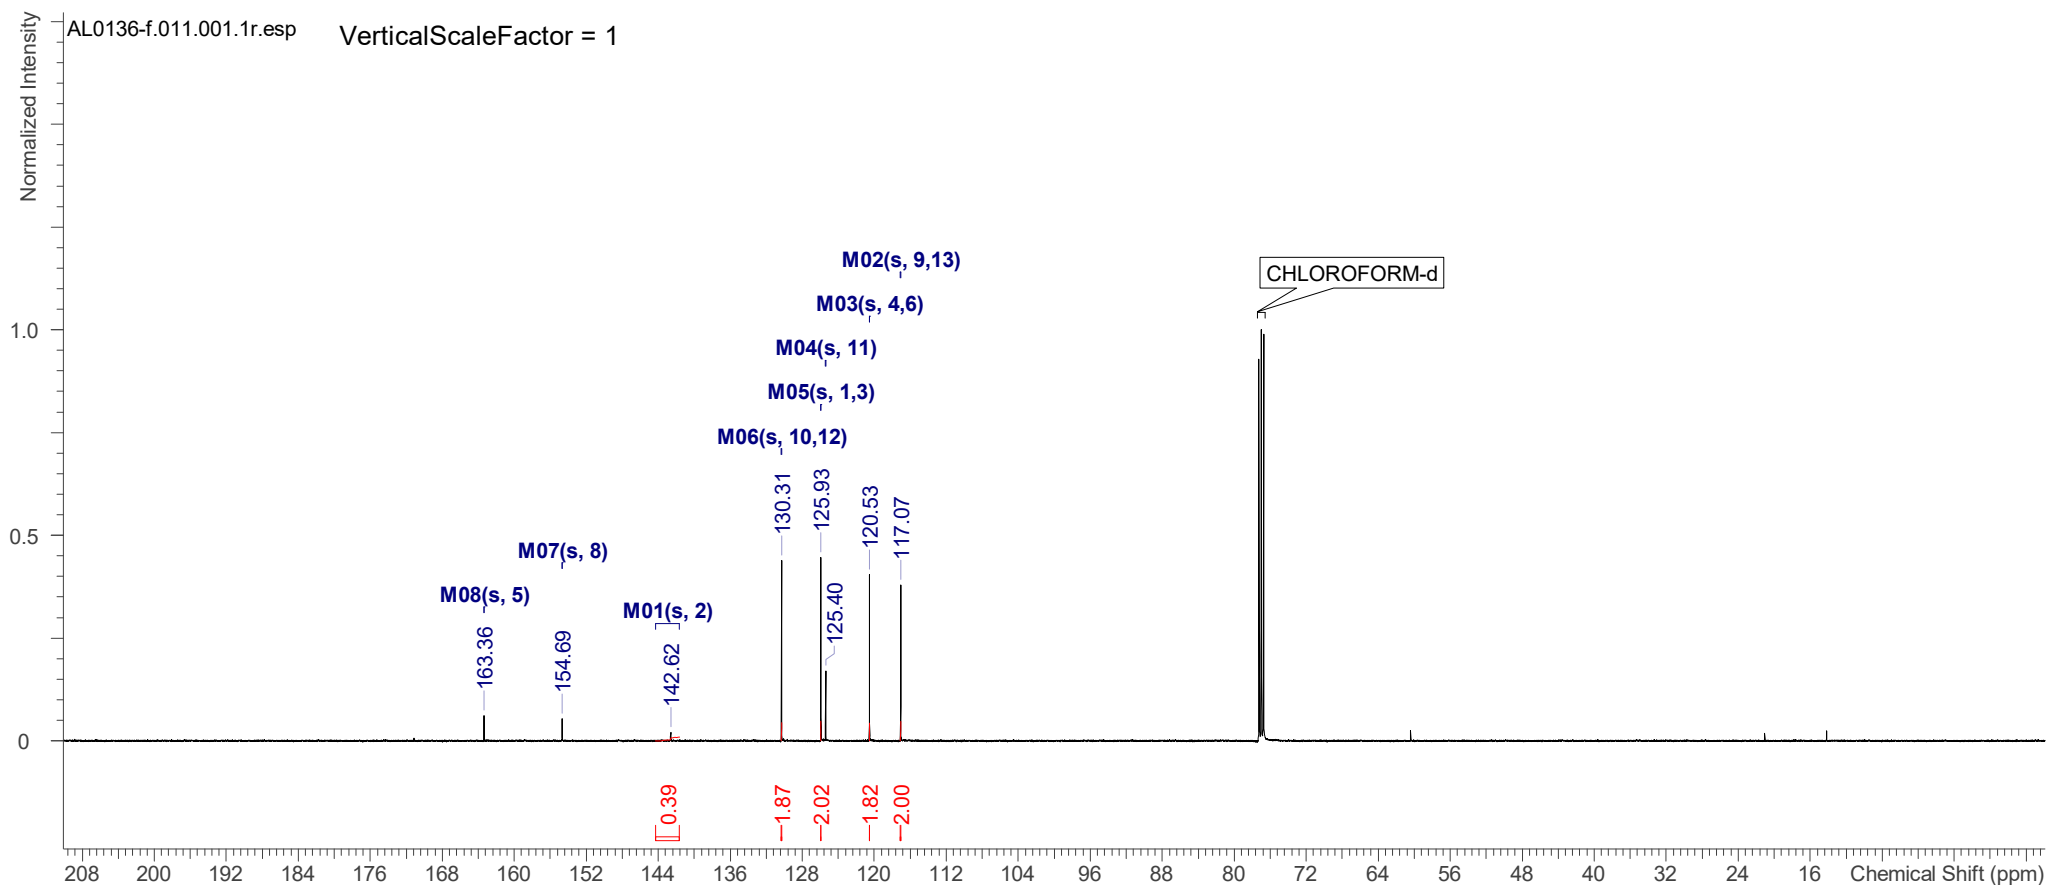

Compound 4d

2/17/2022 7:59:49 AM

|                  |                                      |                          |      |
|------------------|--------------------------------------|--------------------------|------|
| Number of Nuclei | 7 H's / 7 H's (spectrum / structure) | Multiplets Integrals Sum | 7.72 |
|------------------|--------------------------------------|--------------------------|------|

<sup>1</sup>H NMR (500 MHz, CHLOROFORM-*d*, ppm) δ = 8.59 (1 H, d, J = 2.59 Hz), 8.34 (1 H, dd, J = 9.31, 2.75 Hz), 7.50 – 7.46 (2 H, m), 7.14 – 7.10 (2 H, m), 6.91 (1 H, d, J = 9.31 Hz);

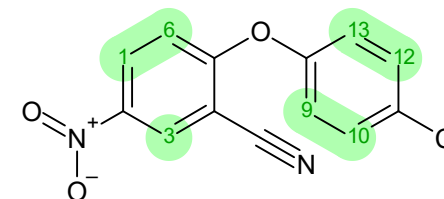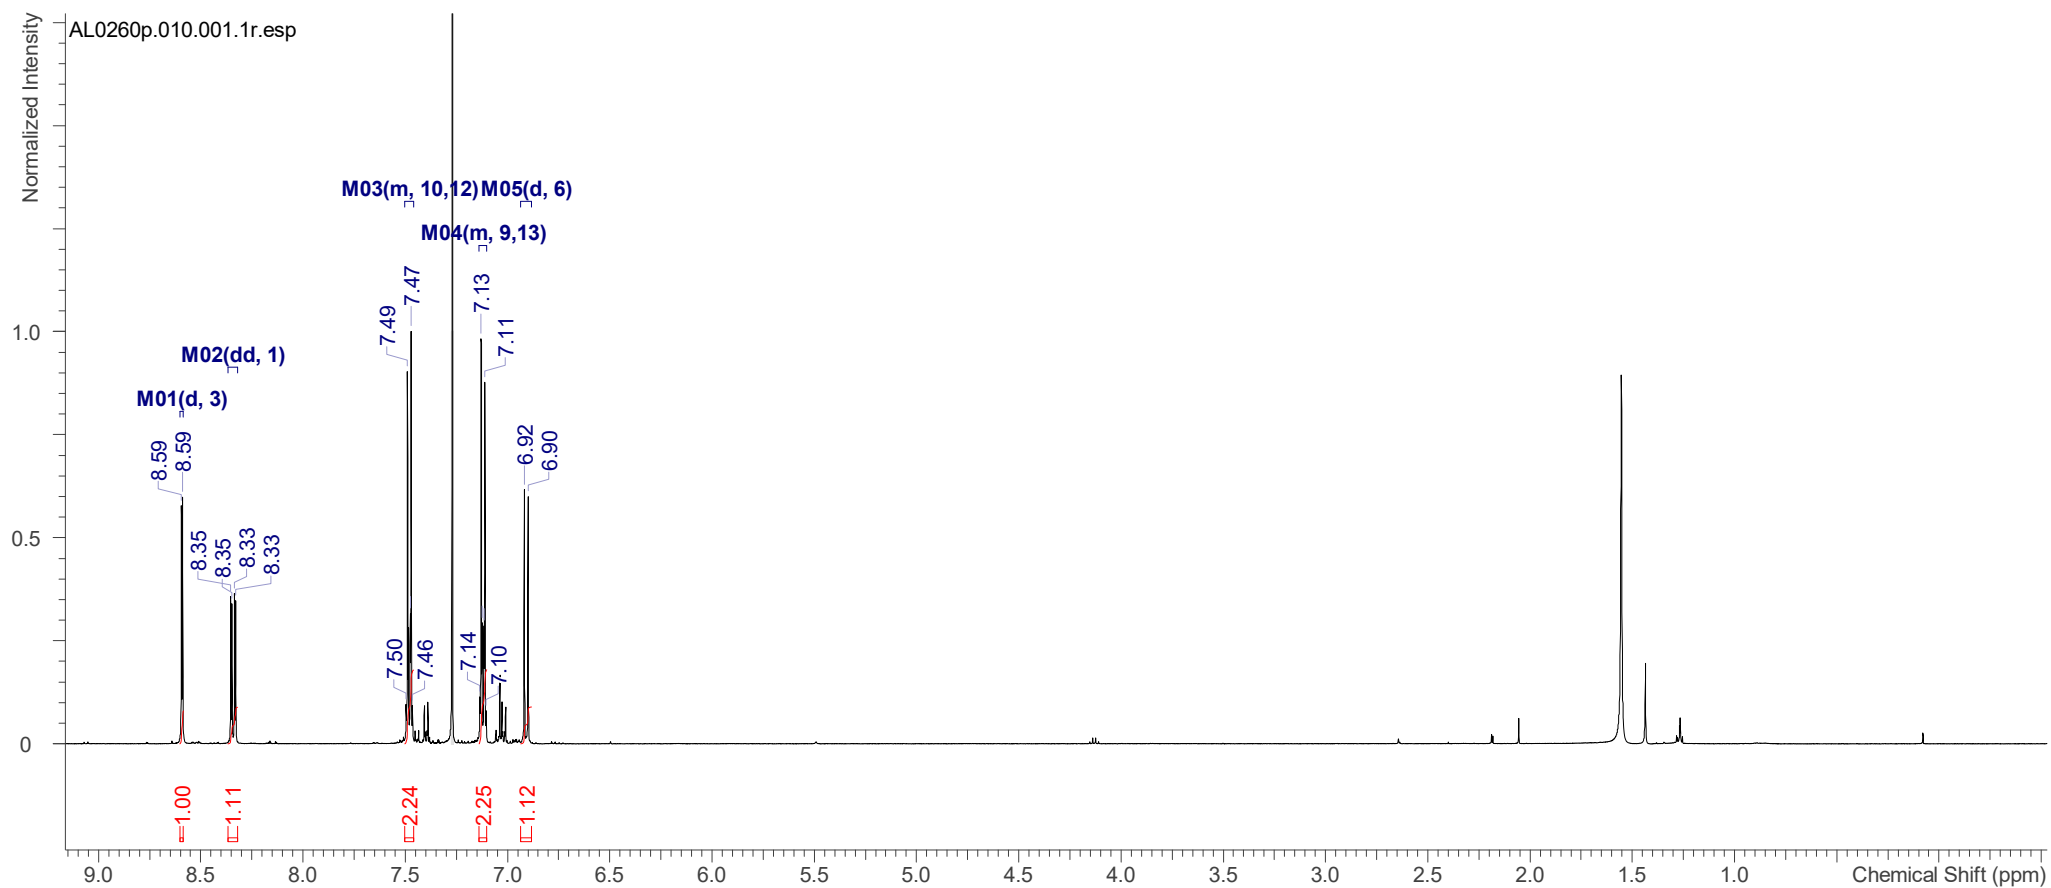

Compound 4d

2/17/2022 7:59:53 AM

|                          |                                        |                                 |      |                              |      |
|--------------------------|----------------------------------------|---------------------------------|------|------------------------------|------|
| <b>Number of Nuclei</b>  | 13 C's / 13 C's (spectrum / structure) | <b>Multiplets Integrals Sum</b> | 4.26 | <b>Bad Phase or Baseline</b> | True |
| <b>Possible Impurity</b> | True                                   |                                 |      |                              |      |

<sup>13</sup>C NMR (126 MHz, CHLOROFORM-*d*, ppm) δ= 164.0 (1 C, s), 151.8 (1 C, s), 142.2 (1 C, s), 132.3 (1 C, s), 130.8 (2 C, s), 130.0 (1 C, s), 129.7 (1 C, s), 122.2 (2 C, s), 115.5 (1 C, s), 113.7 (1 C, s), 103.9 (1 C, s)

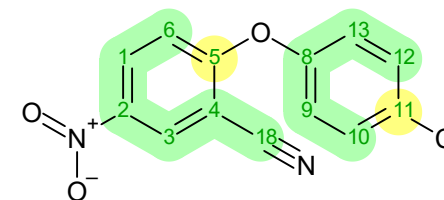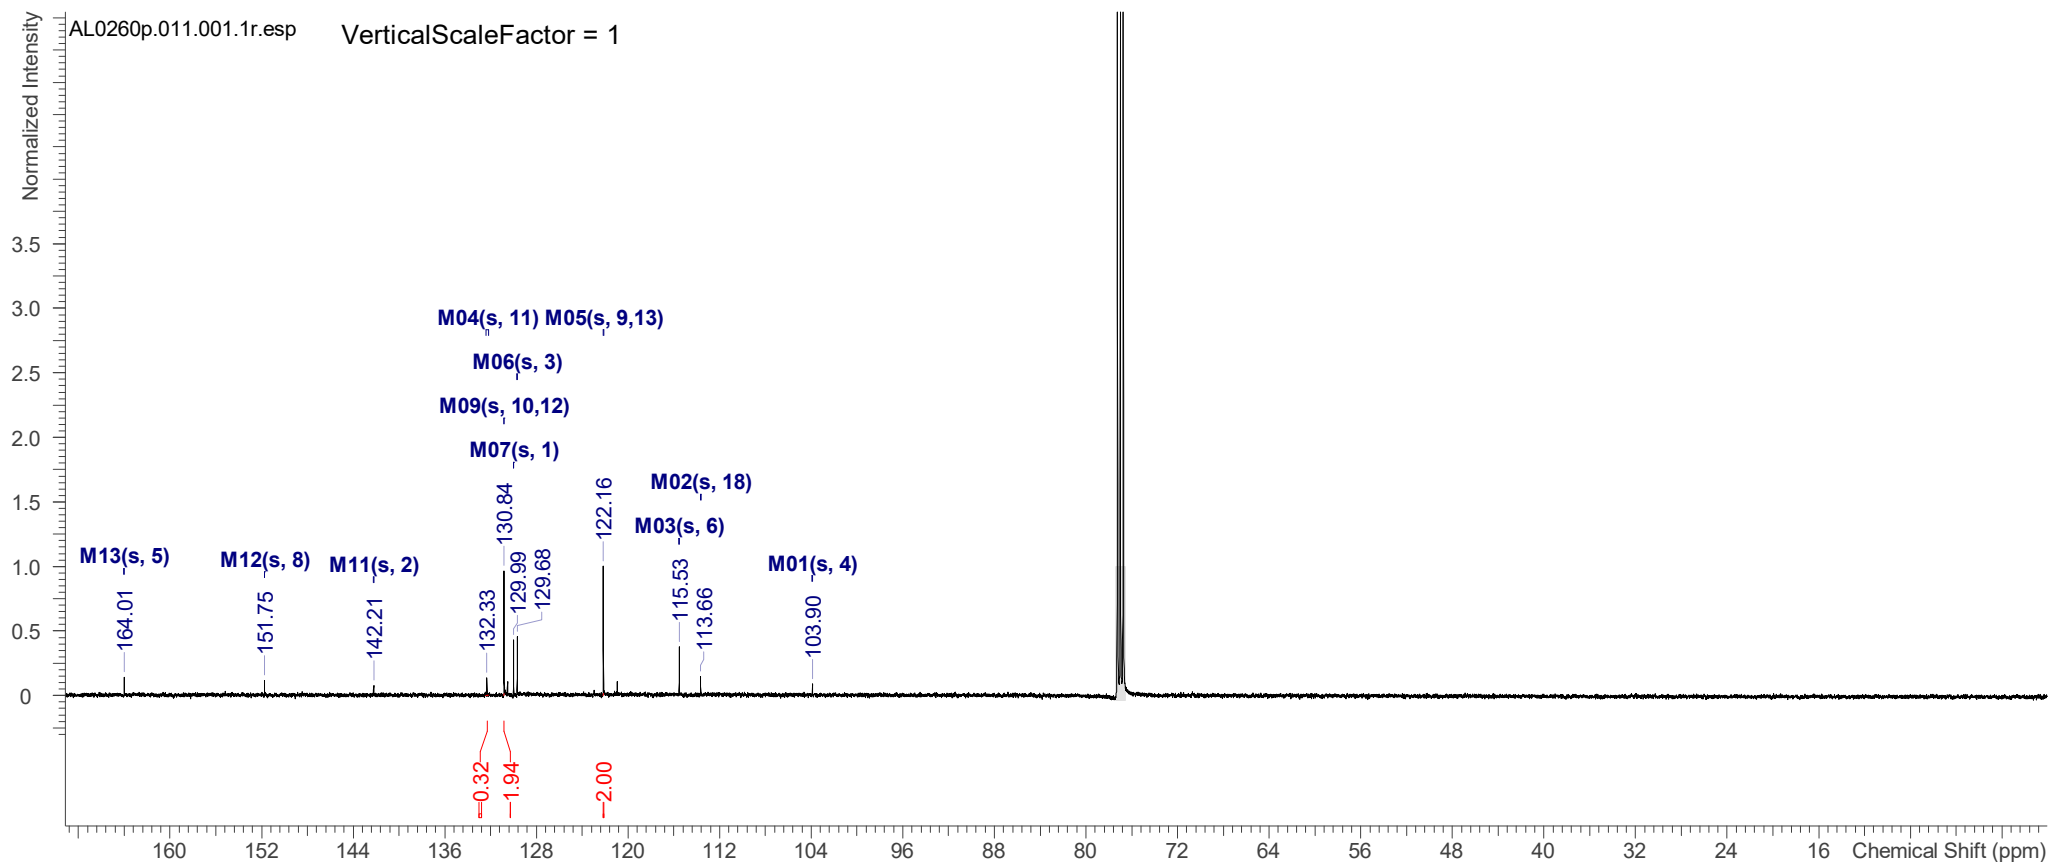

Compound 4e

4/6/2022 1:51:53 PM

|                         |                                      |                                 |      |
|-------------------------|--------------------------------------|---------------------------------|------|
| <b>Number of Nuclei</b> | 7 H's / 7 H's (spectrum / structure) | <b>Multiplets Integrals Sum</b> | 7.72 |
|-------------------------|--------------------------------------|---------------------------------|------|

<sup>1</sup>H NMR (500 MHz, CHLOROFORM-d, ppm) δ = 8.63 (1 H, d, J = 2.59 Hz), 8.41 (1 H, dd, J = 9.16, 2.75 Hz), 7.85 – 7.79 (2 H, m), 7.29 – 7.26 (2 H, m), 7.03 (1 H, d, J = 9.31 Hz);

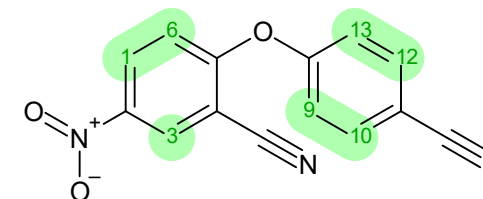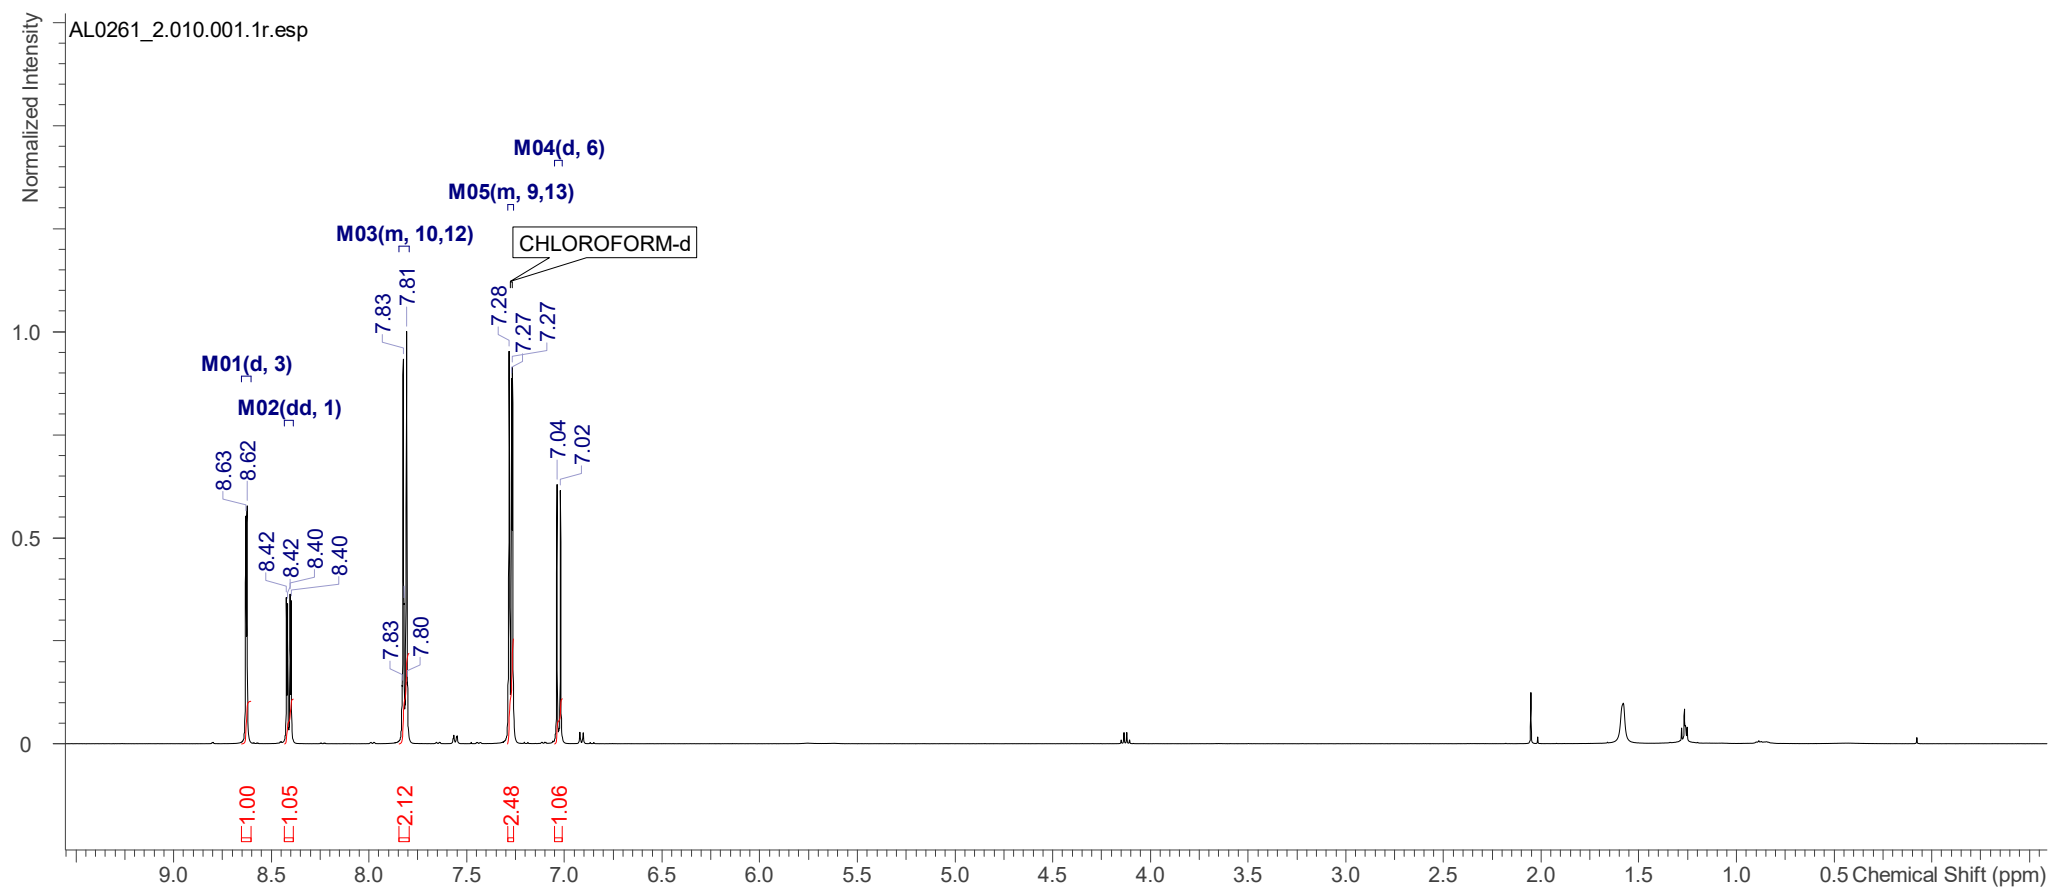

Compound 4e

4/6/2022 1:51:56 PM

|                         |                                        |                                 |      |
|-------------------------|----------------------------------------|---------------------------------|------|
| <b>Number of Nuclei</b> | 14 C's / 14 C's (spectrum / structure) | <b>Multiplets Integrals Sum</b> | 0.00 |
|-------------------------|----------------------------------------|---------------------------------|------|

<sup>13</sup>C NMR (126 MHz, CHLOROFORM-d, ppm) δ= 162.4 (1 C, s), 157.0 (1 C, s), 143.1 (1 C, s), 134.9 (2 C, s), 130.1 (1 C, s), 129.8 (1 C, s), 121.0 (2 C, s), 117.6 (1 C, s), 117.1 (1 C, s), 113.3 (1 C, s), 110.4 (1 C, s), 105.1 (1 C, s)

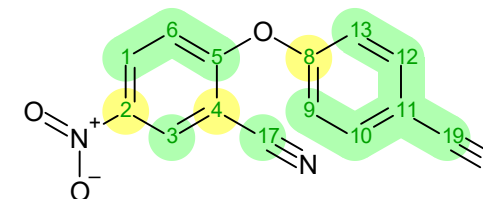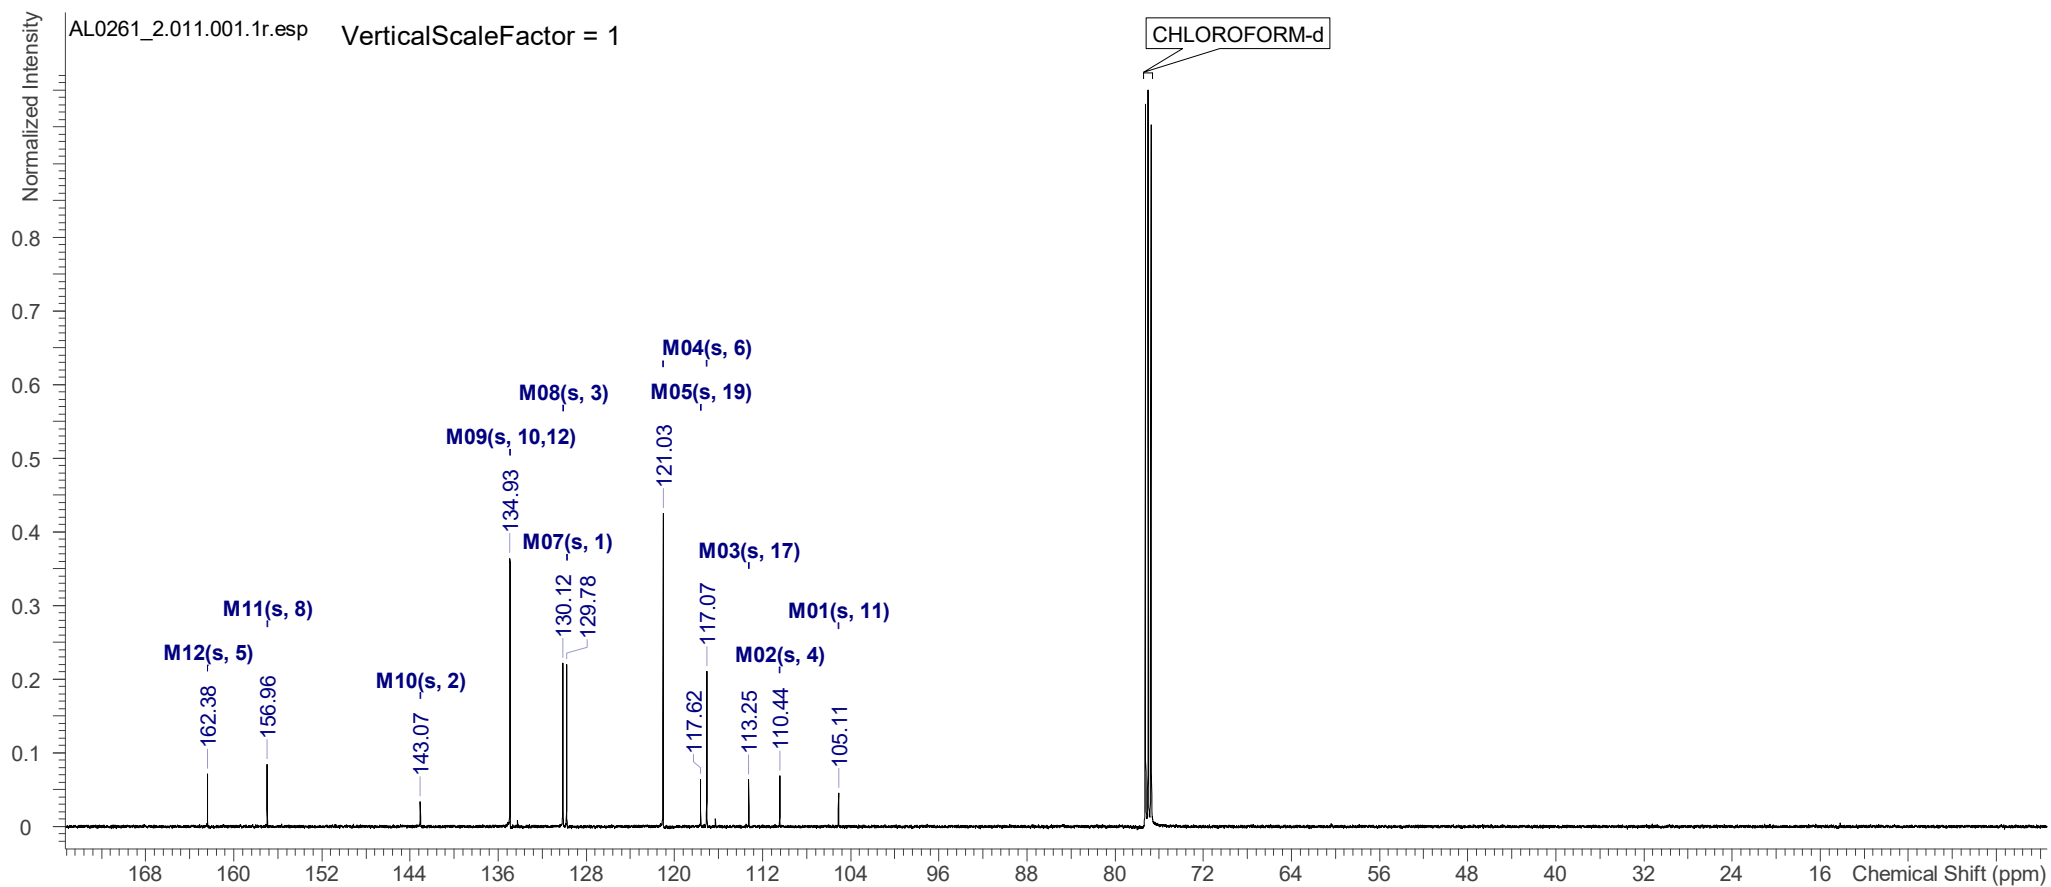

Compound 4f

4/2/2024 1:15:48 PM

|                         |                                      |                                      |
|-------------------------|--------------------------------------|--------------------------------------|
| <b>Number of Nuclei</b> | 7 H's / 7 H's (spectrum / structure) | <b>Multiplets Integrals Sum</b> 7.24 |
|-------------------------|--------------------------------------|--------------------------------------|

<sup>1</sup>H NMR (500 MHz, ACETONITRILE-d<sub>3</sub>, ppm) δ= 8.15 (1 H, dd, J = 10.76, 2.67 Hz), 8.00 (1 H, dt, J = 9.12, 1.70 Hz), 7.24 – 7.15 (4 H, m), 7.02 (1 H, t, J = 8.70 Hz);

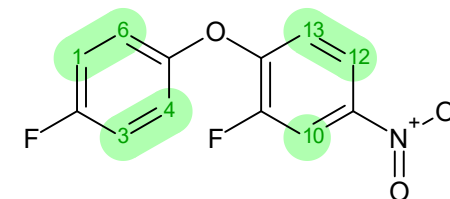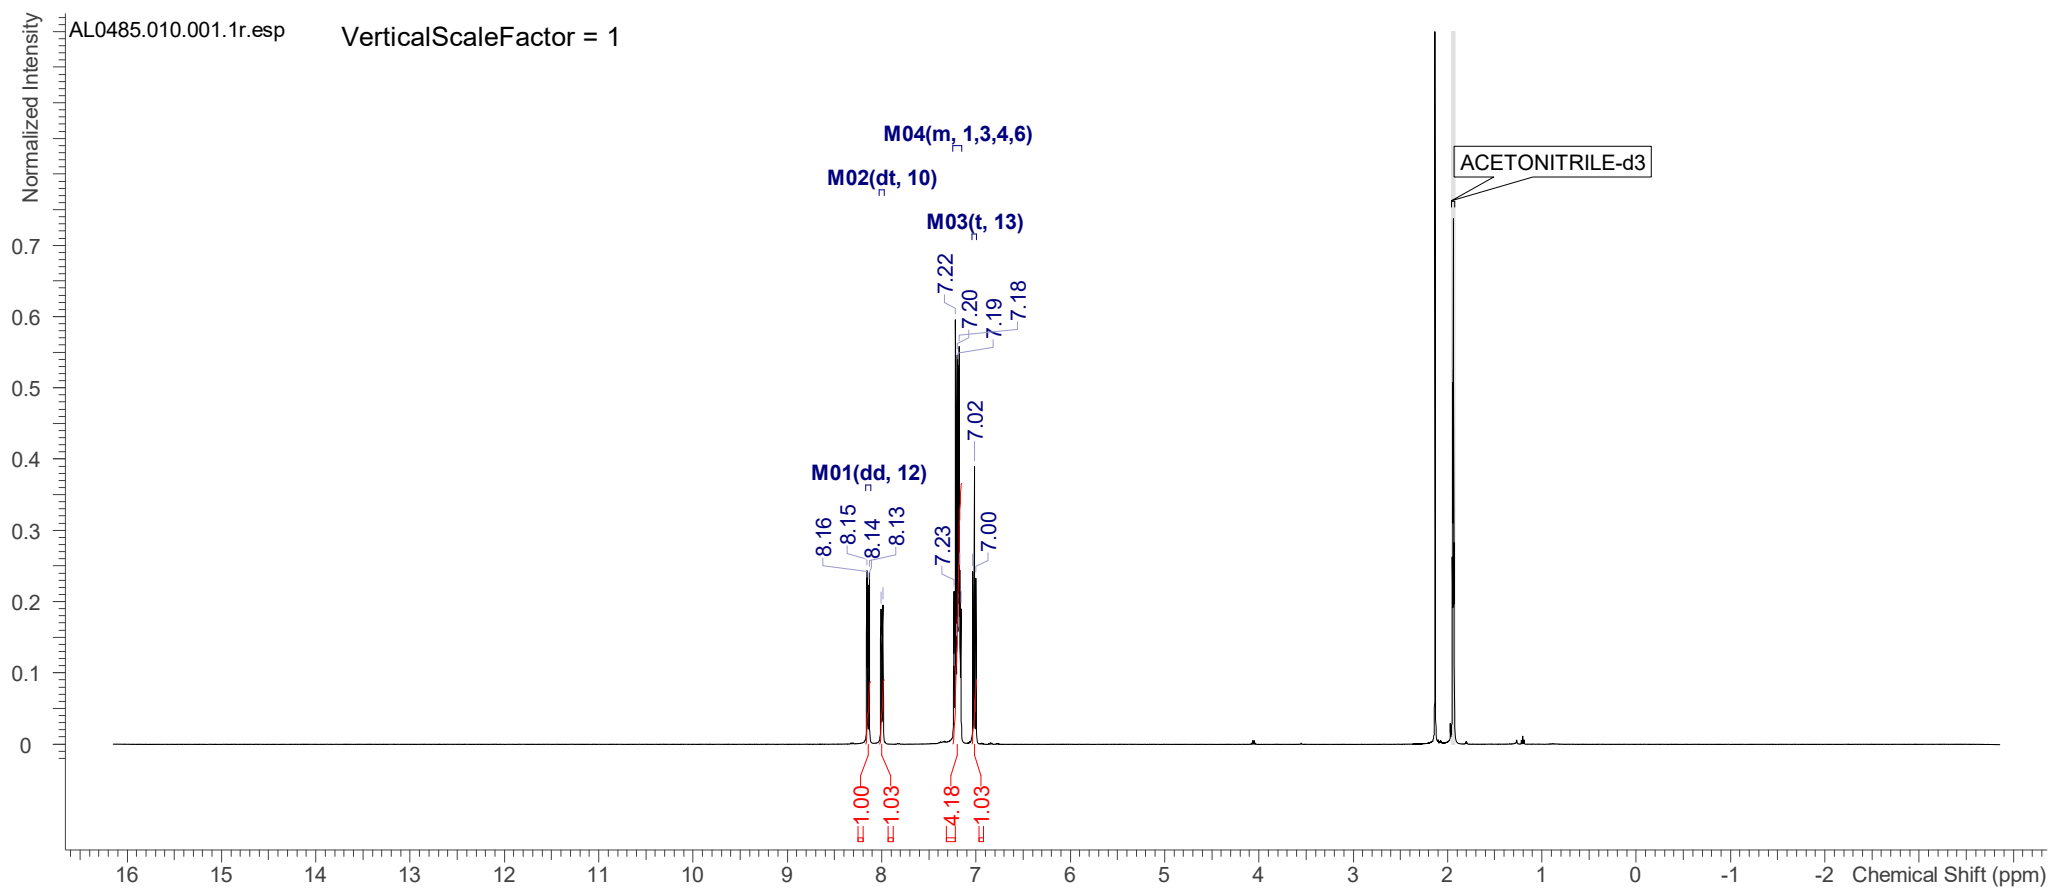

Compound 4f

4/2/2024 1:15:51 PM

|                         |                                        |                                      |
|-------------------------|----------------------------------------|--------------------------------------|
| <b>Number of Nuclei</b> | 12 C's / 12 C's (spectrum / structure) | <b>Multiplets Integrals Sum</b> 7.27 |
|-------------------------|----------------------------------------|--------------------------------------|

<sup>13</sup>C NMR (126 MHz, ACETONITRILE-d<sub>3</sub>, ppm) δ= 114.1 (1 C, d, J = 22.98 Hz), 118.0 (2 C, d, J = 23.90 Hz), 119.2 (1 C, s), 122.0 (1 C, d, J = 3.68 Hz), 122.6 (2 C, d, J = 9.19 Hz), 143.9 (1 C, br d, J = 8.27 Hz), 151.8 (1 C, d, J = 2.76 Hz), 153.0 (1 C, d, J = 250.02 Hz), 152.3 (1 C, d, J = 10.11 Hz), 161.0 (1 C, d, J = 241.75 Hz);

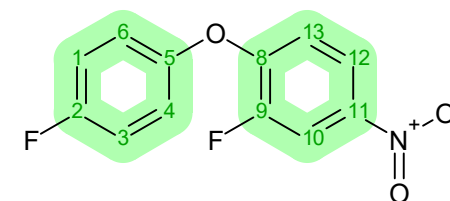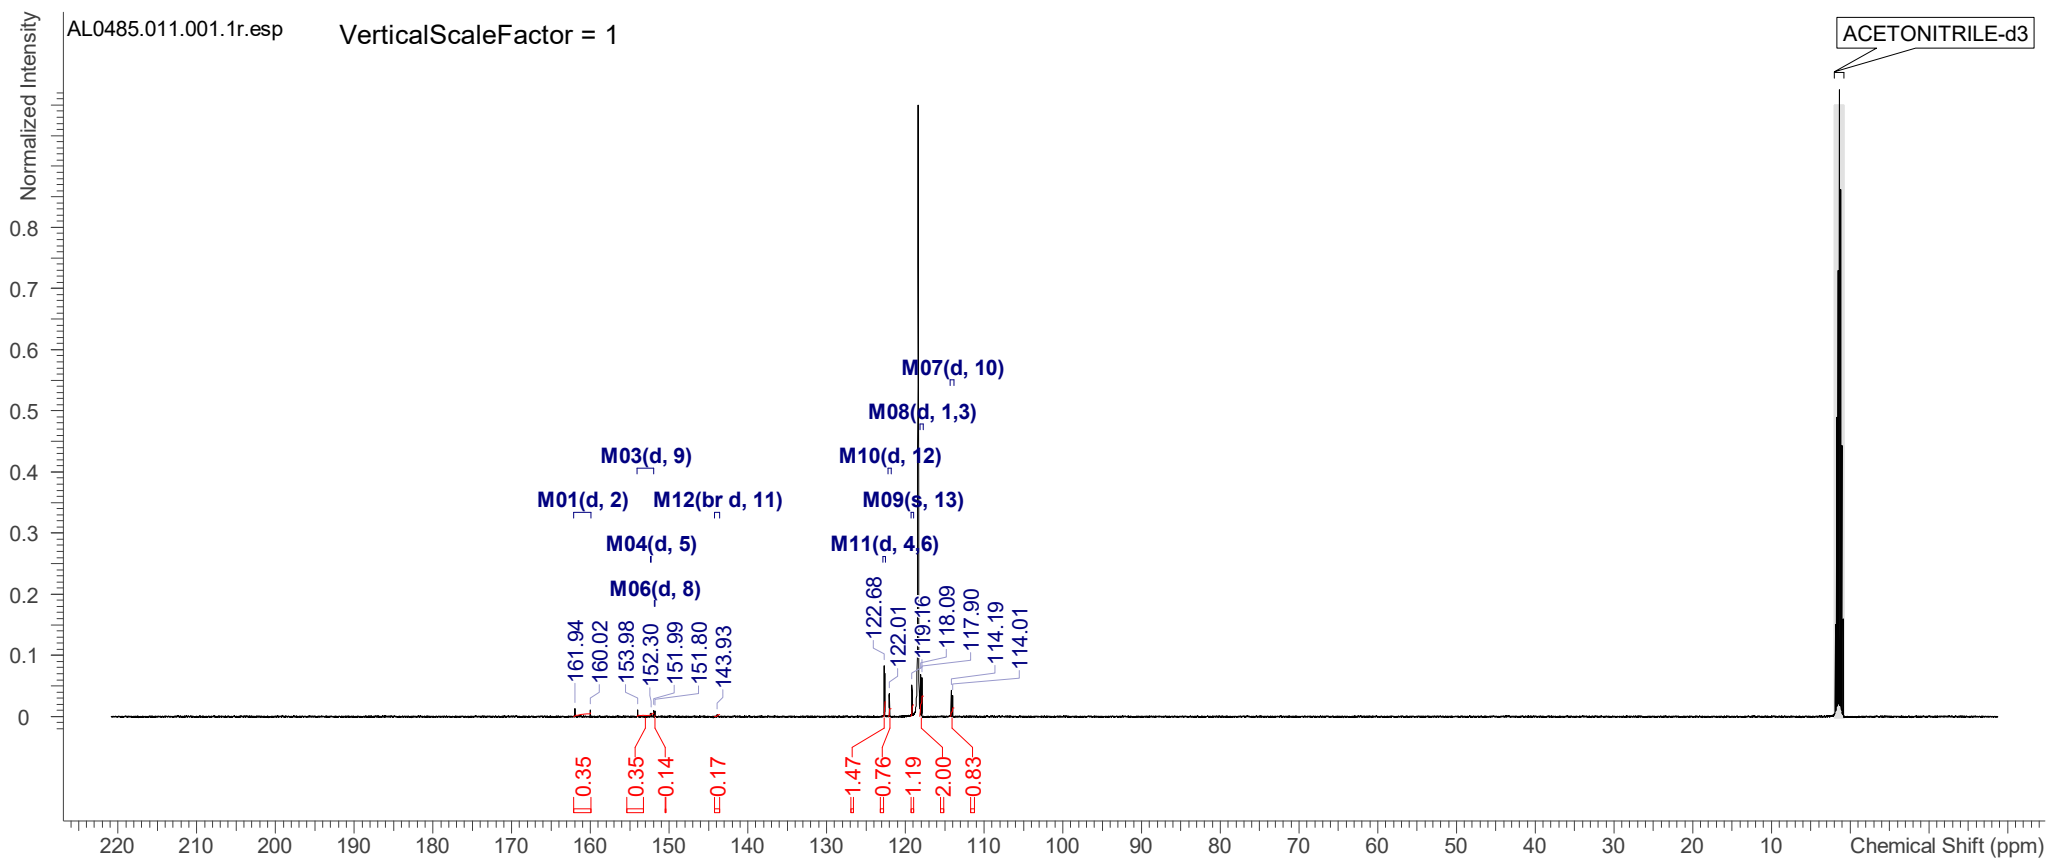

Compound 4f

4/2/2024 1:15:54 PM

|                         |                                      |                                       |
|-------------------------|--------------------------------------|---------------------------------------|
| <b>Number of Nuclei</b> | 2 F's / 2 F's (spectrum / structure) | <b>Multiplets Integrals Sum</b> 26.10 |
|-------------------------|--------------------------------------|---------------------------------------|

<sup>19</sup>F NMR (470 MHz, ACETONITRILE-*d*<sub>3</sub>, ppm) δ= -131.1 (1 F, br d, J = 8.67 Hz), -119.0 (1 F, s)

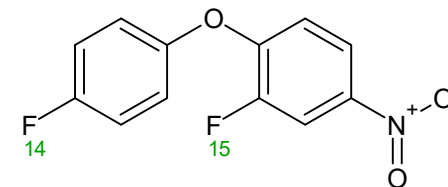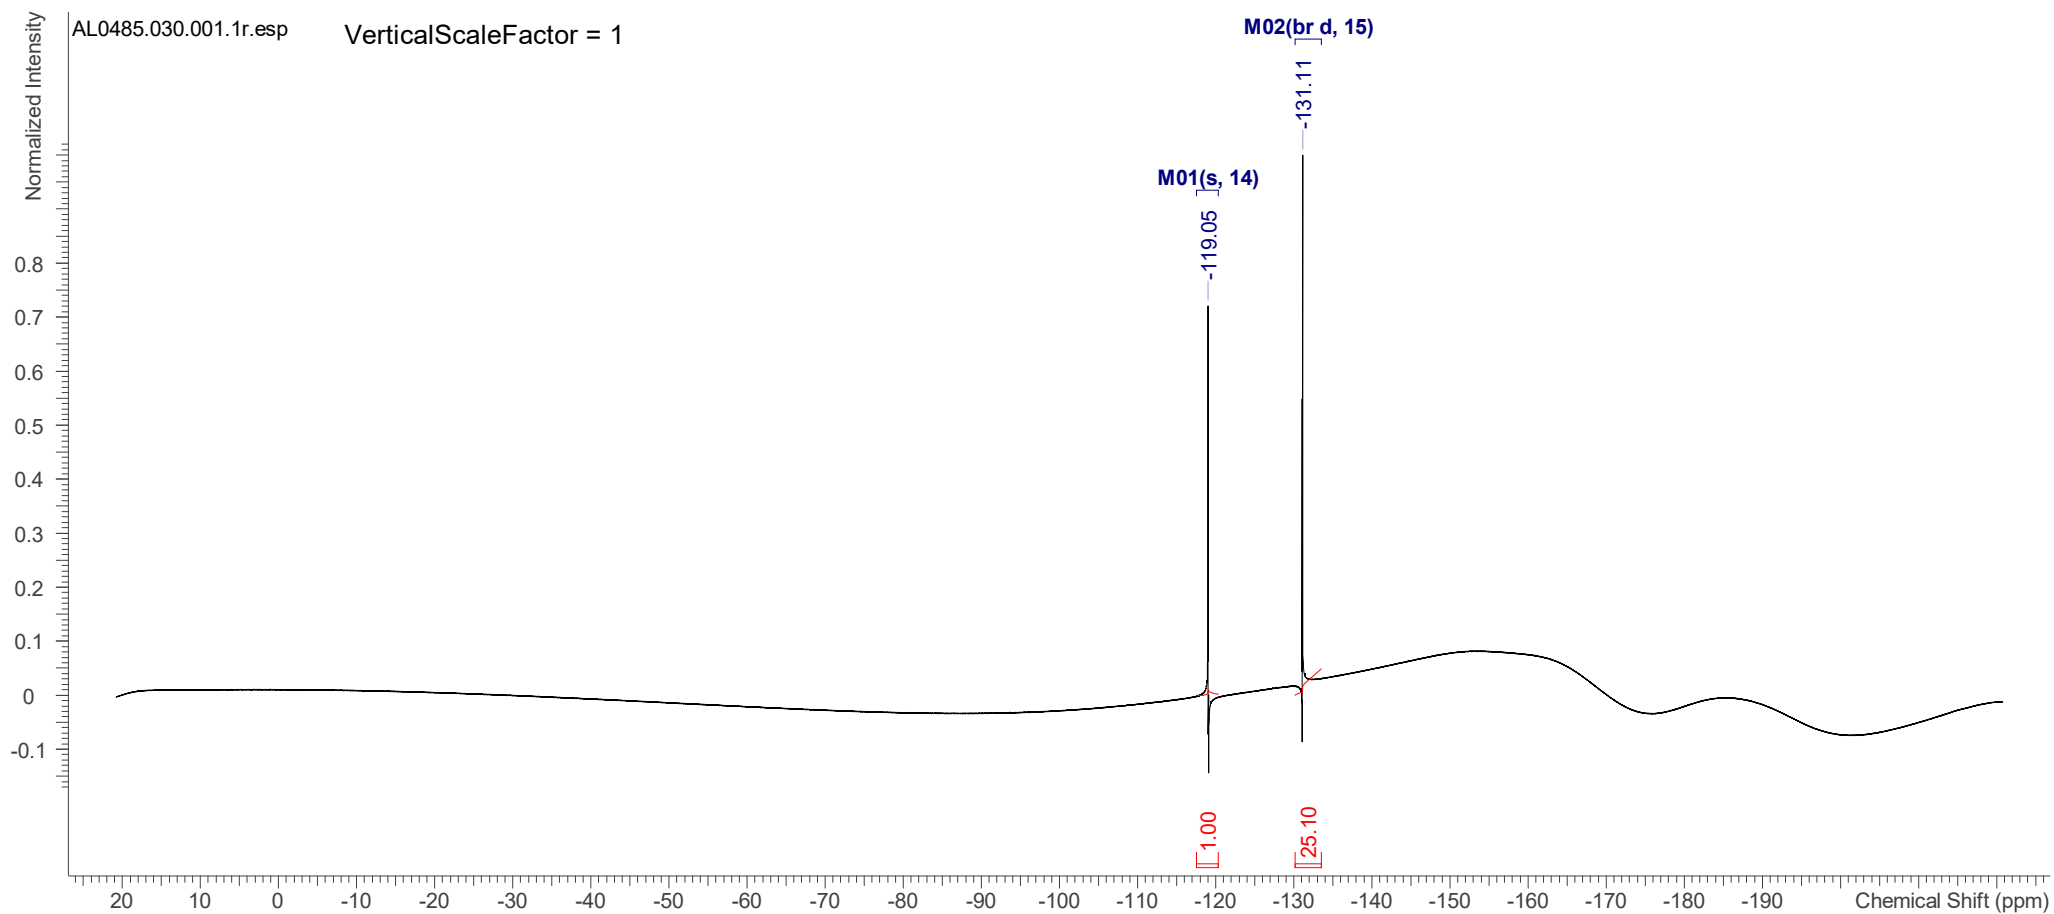

Compound 4g

4/2/2024 1:16:17 PM

Multiplets Integrals Sum 7.19 Number of Nuclei 7 H's / 7 H's (spectrum / structure)

<sup>1</sup>H NMR (500 MHz, ACETONITRILE-d<sub>3</sub>, ppm) δ= 8.15 (1 H, dd, J = 10.68, 2.75 Hz), 8.02 (1 H, dt, J = 9.04, 1.81 Hz), 7.49 – 7.43 (2 H, m), 7.16 – 7.12 (2 H, m), 7.10 (1 H, t, J = 8.70 Hz);

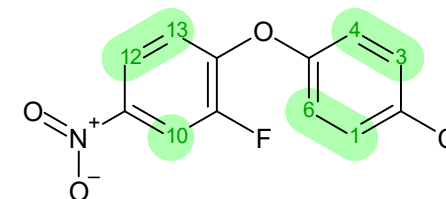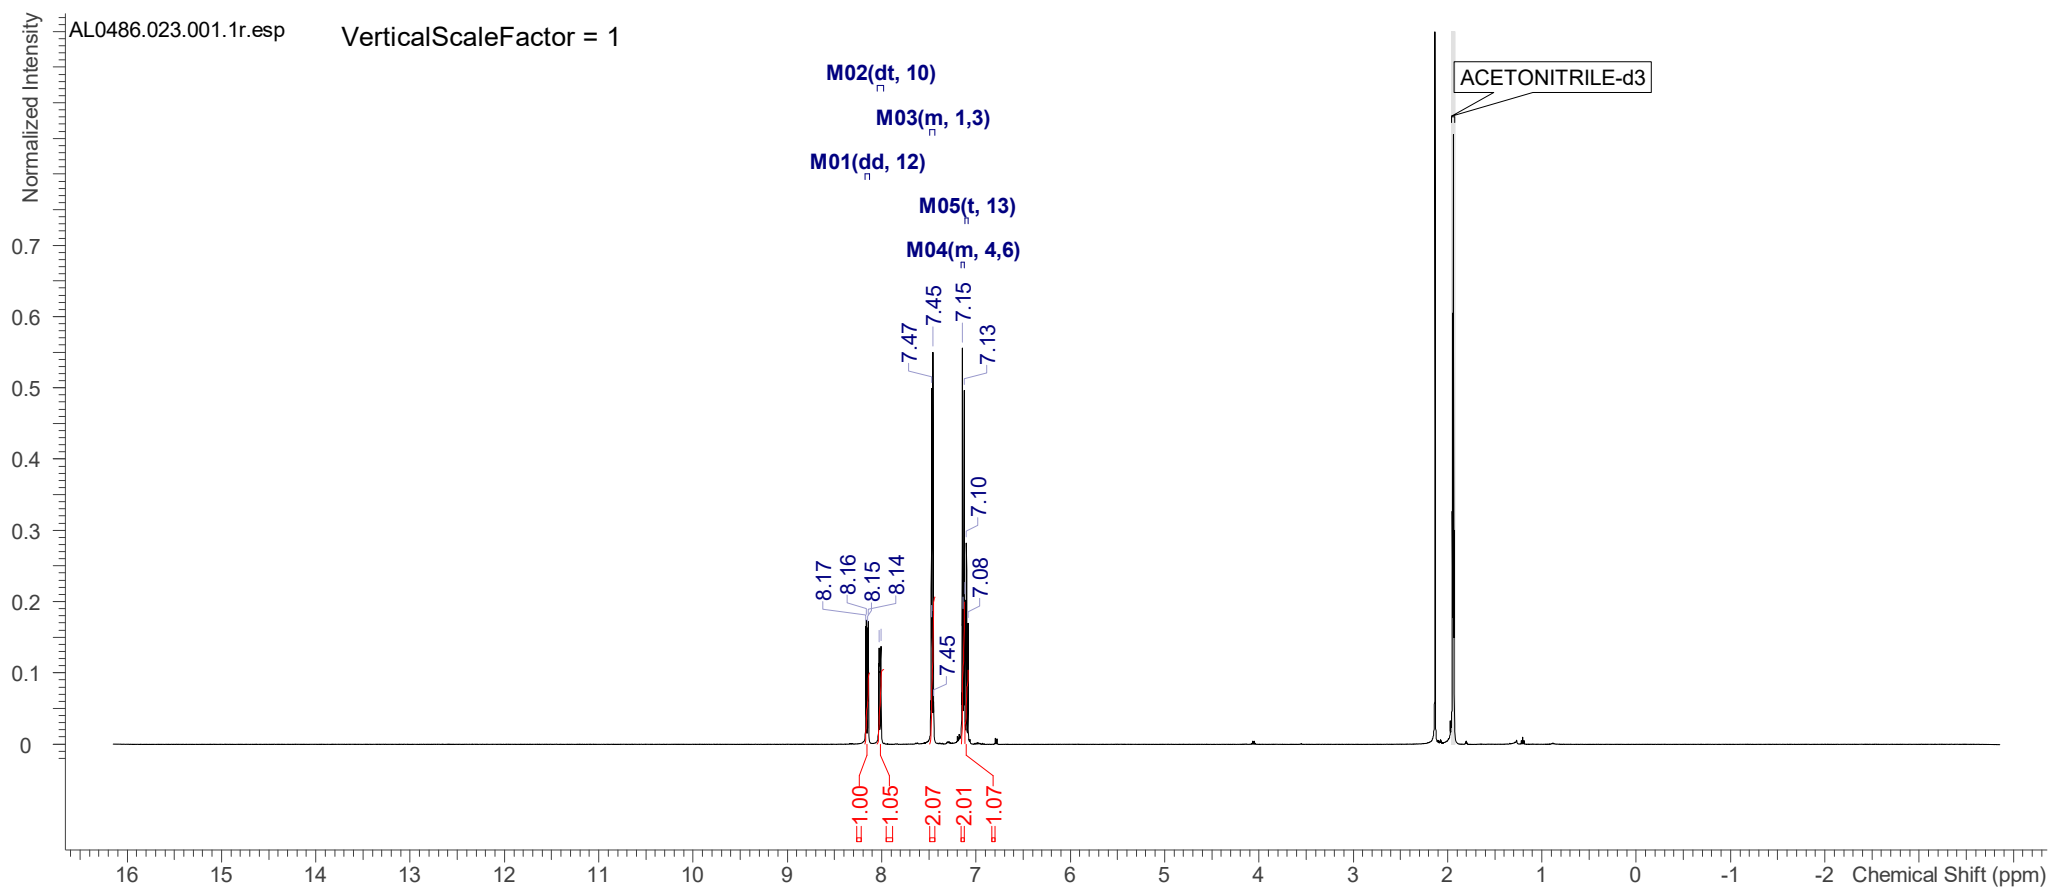

Compound 4g

4/2/2024 1:16:21 PM

|                         |                                        |                                      |
|-------------------------|----------------------------------------|--------------------------------------|
| <b>Number of Nuclei</b> | 12 C's / 12 C's (spectrum / structure) | <b>Multiplets Integrals Sum</b> 7.57 |
|-------------------------|----------------------------------------|--------------------------------------|

$^{13}\text{C}$  NMR (126 MHz, ACETONITRILE- $d_3$ , ppm)  $\delta$ = 114.2 (1 C, d, J = 23.90 Hz), 120.1 (1 C, s), 122.1 (1 C, br s), 122.1 (2 C, s), 131.0 (1 C, s), 131.4 (2 C, s), 144.4 (1 C, s), 151.5 (1 C, d, J = 11.95 Hz), 153.3 (1 C, d, J = 250.94 Hz), 154.9 (1 C, s)

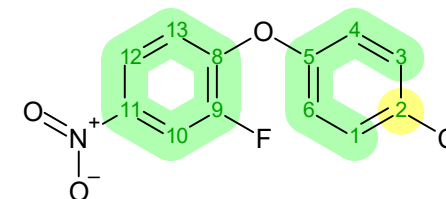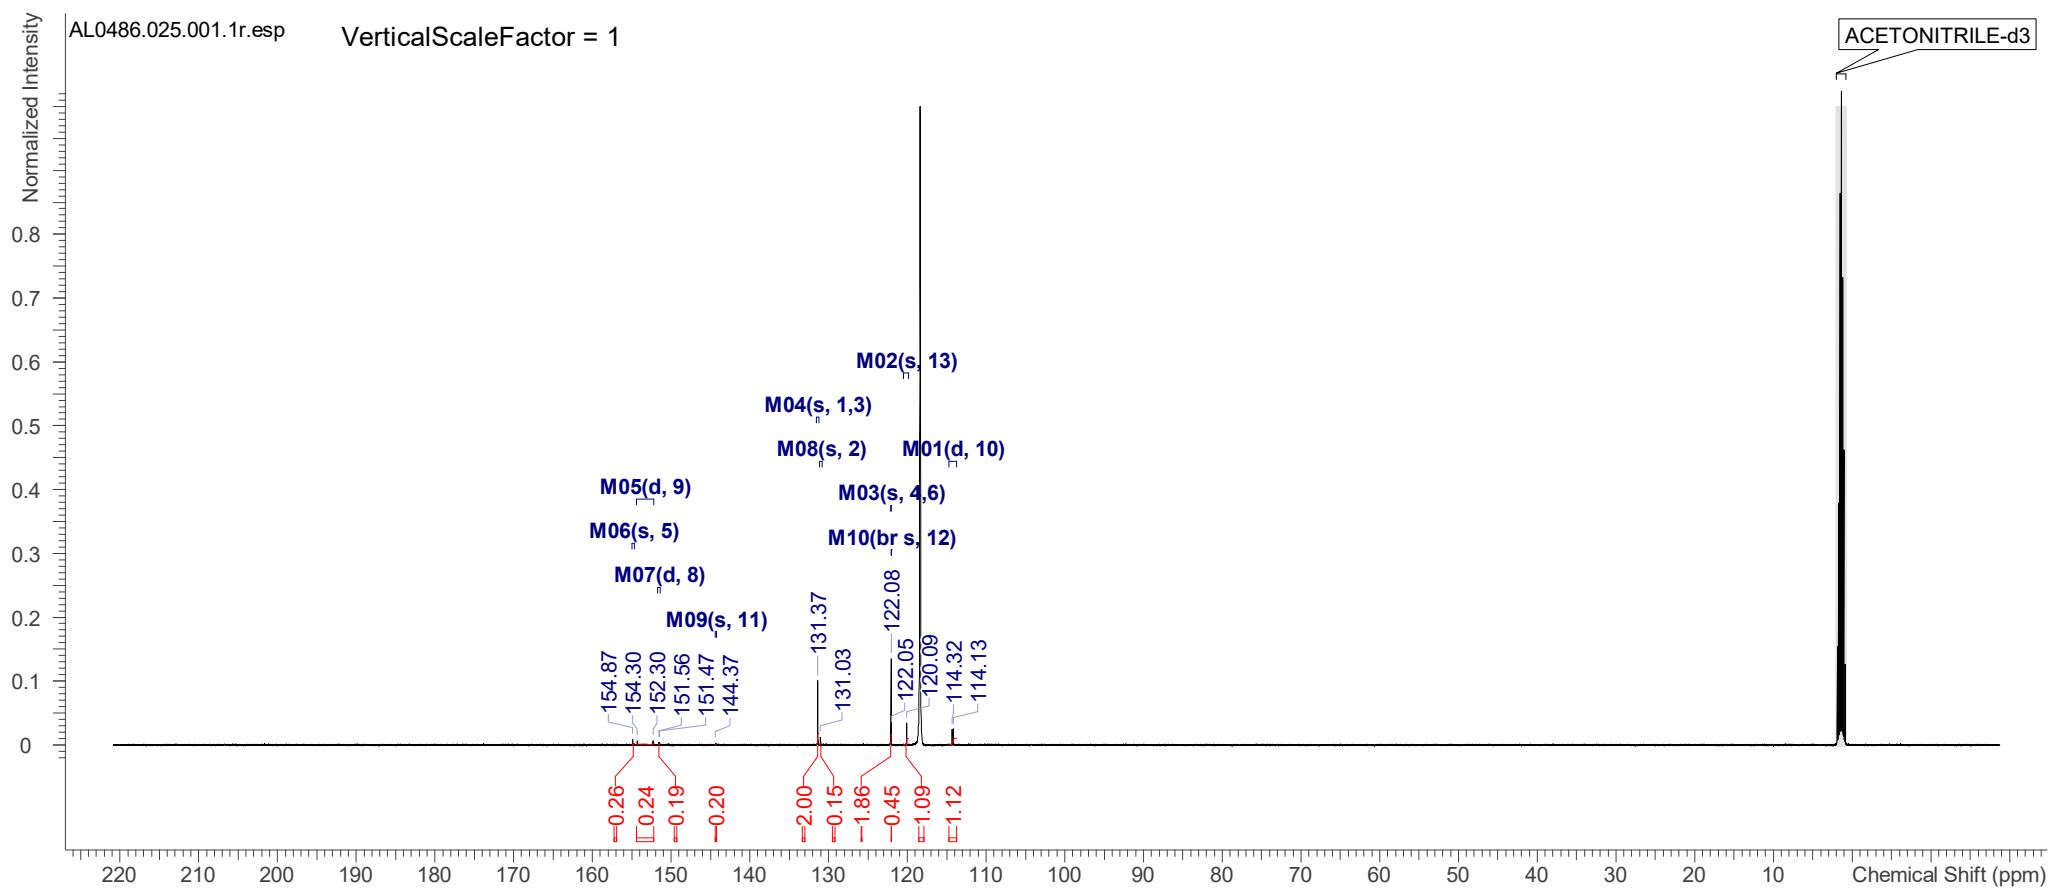

Compound 4g

4/2/2024 1:16:25 PM

|                  |                                      |                                |
|------------------|--------------------------------------|--------------------------------|
| Number of Nuclei | 1 F's / 1 F's (spectrum / structure) | Multiplets Integrals Sum -7.39 |
|------------------|--------------------------------------|--------------------------------|

$^{19}\text{F}$  NMR (470 MHz, ACETONITRILE- $d_3$ , ppm)  $\delta = -130.4$  (1 F, br d,  $J = 8.68$  Hz)

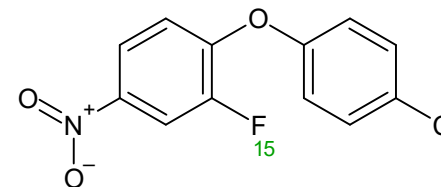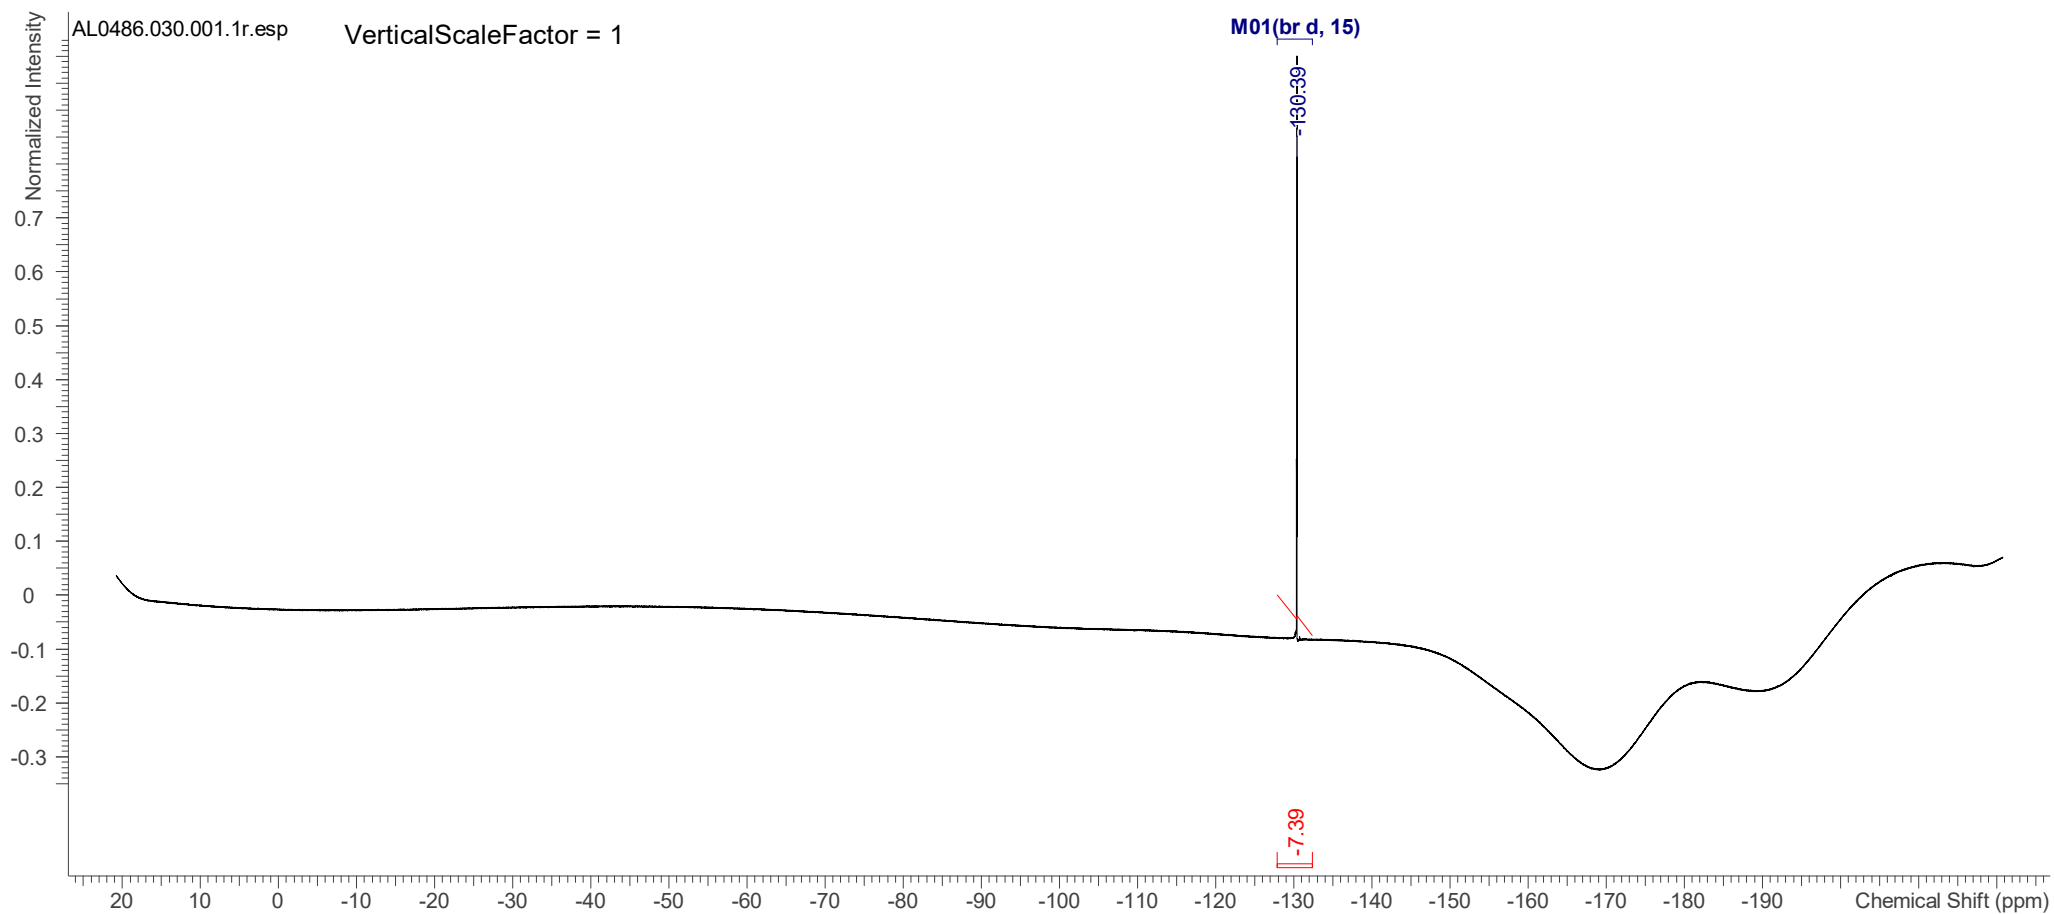

Compound 4h

4/2/2024 1:16:39 PM

Multiplets Integrals Sum 7.55 Number of Nuclei 7 H's / 7 H's (spectrum / structure)

<sup>1</sup>H NMR (500 MHz, ACETONITRILE-d<sub>3</sub>, ppm) δ = 8.39 (1 H, d, J = 2.59 Hz), 8.07 (1 H, dd, J = 9.16, 2.59 Hz), 7.25 – 7.14 (4 H, m), 6.92 (1 H, d, J = 9.16 Hz);

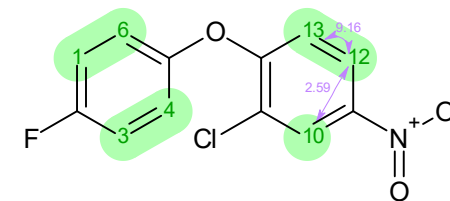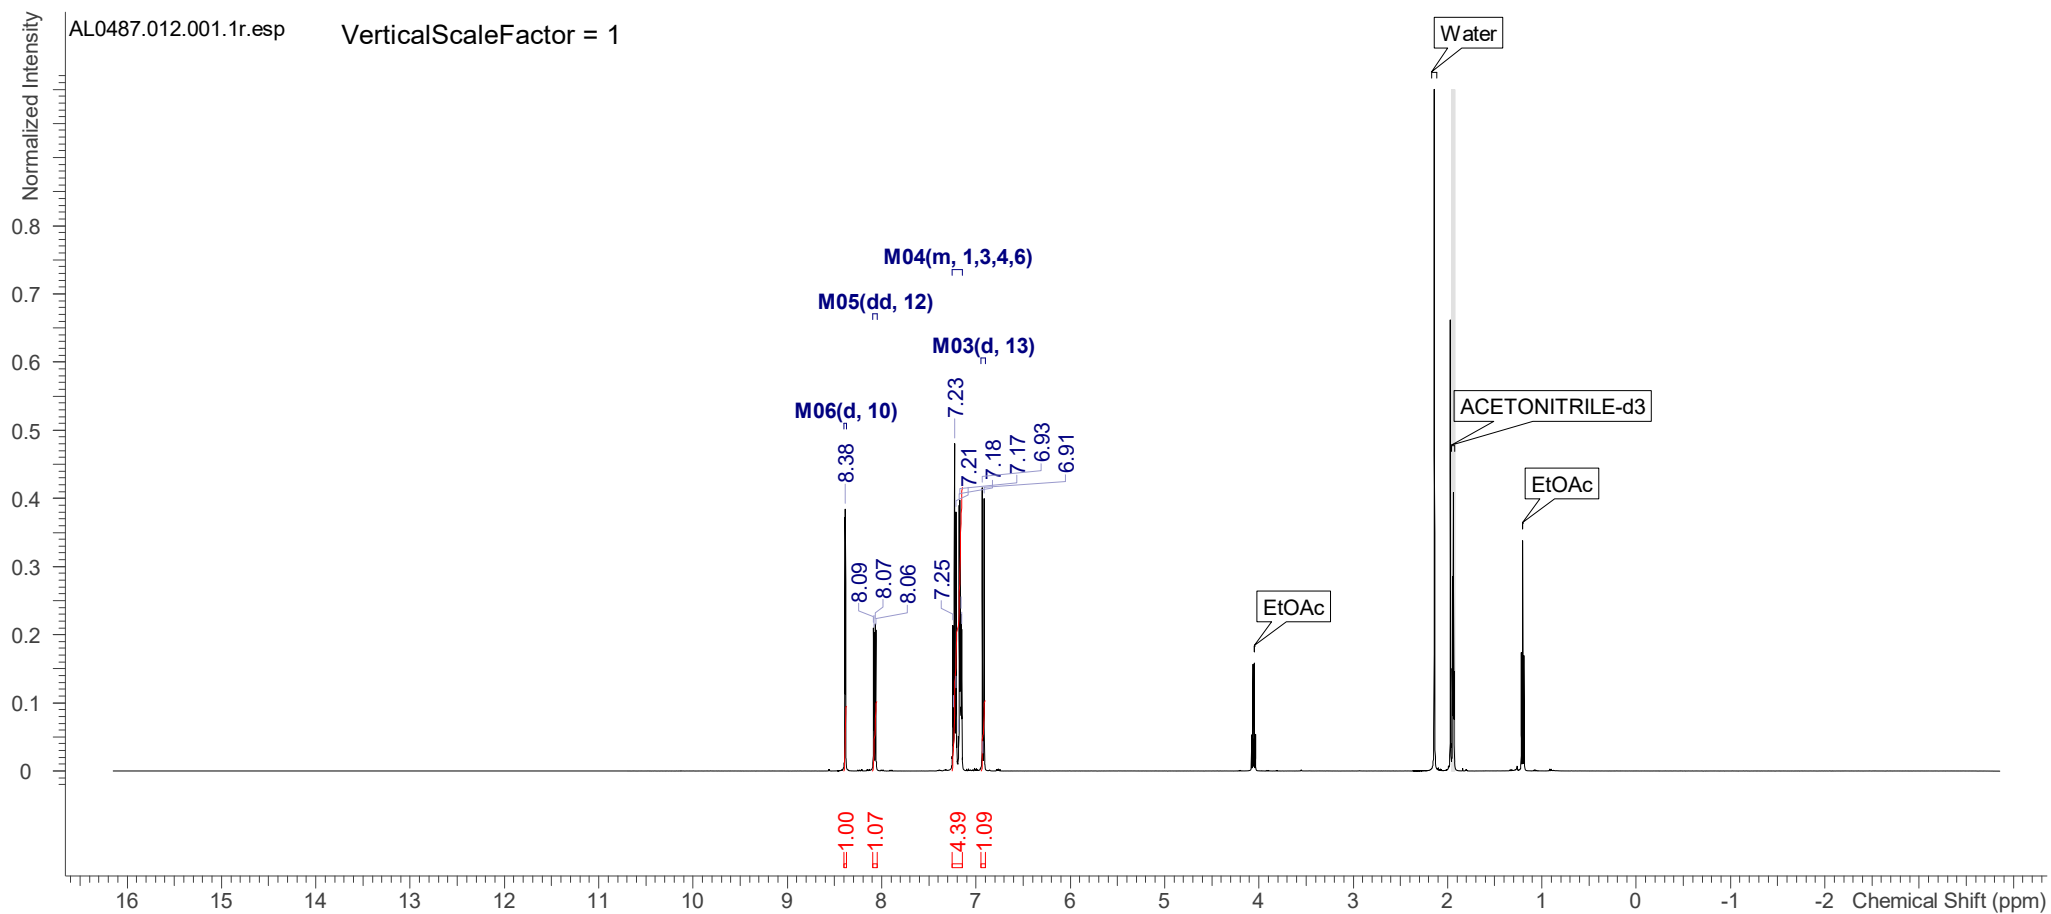

Compound 4h

4/2/2024 1:16:44 PM

|                         |                                        |                                       |
|-------------------------|----------------------------------------|---------------------------------------|
| <b>Number of Nuclei</b> | 12 C's / 12 C's (spectrum / structure) | <b>Multiplets Integrals Sum</b> 15.32 |
|-------------------------|----------------------------------------|---------------------------------------|

<sup>13</sup>C NMR (126 MHz, ACETONITRILE-d<sub>3</sub>, ppm) δ= 118.1 (2 C, d, J = 23.90 Hz), 118.3 – 118.4 (1 C, m), 123.1 (2 C, d, J = 8.27 Hz), 124.9 (1 C, s), 125.2 (1 C, s), 127.3 (1 C, s), 144.0 (1 C, s), 151.6 (1 C, d, J = 2.76 Hz), 161.1 (1 C, d, J = 256.46 Hz), 160.2 (1 C, s)

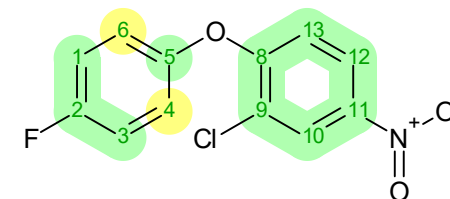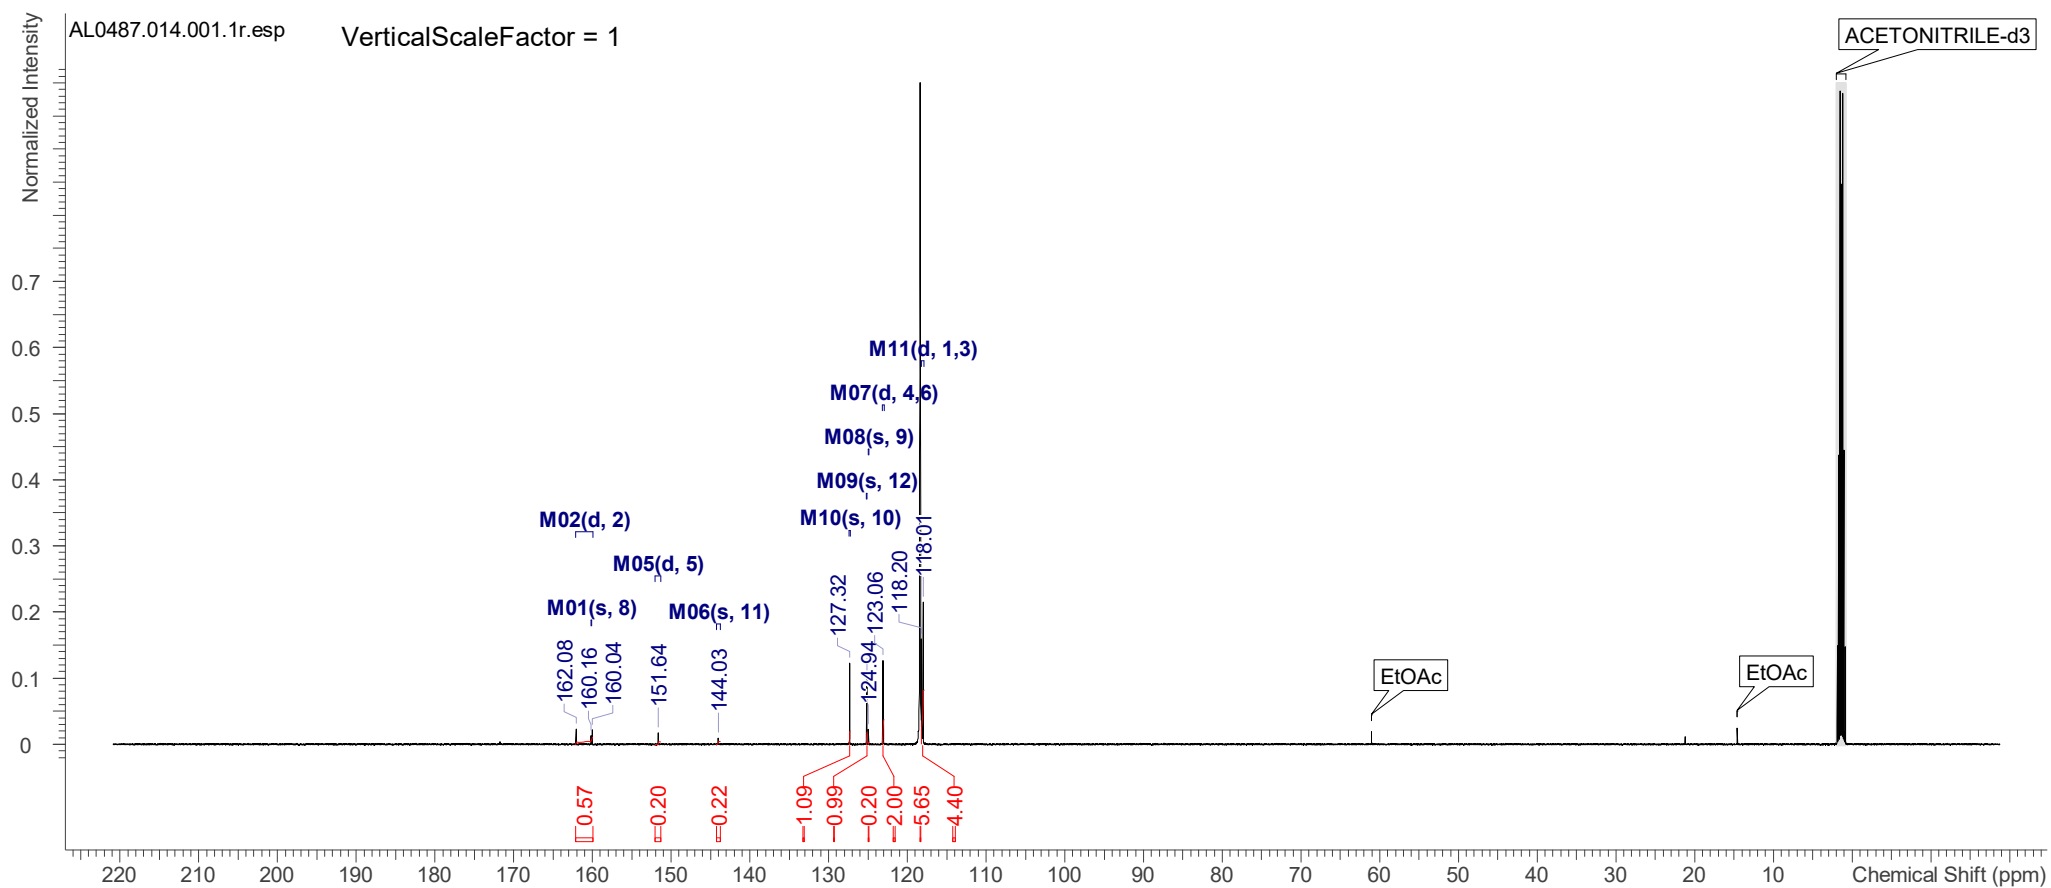

Compound 4h

4/2/2024 1:16:47 PM

|                  |                                      |                                |
|------------------|--------------------------------------|--------------------------------|
| Number of Nuclei | 1 F's / 1 F's (spectrum / structure) | Multiplets Integrals Sum -1.00 |
|------------------|--------------------------------------|--------------------------------|

$^{19}\text{F}$  NMR (470 MHz, ACETONITRILE- $d_3$ )  $\delta$  ppm -119.77 - -117.40 (1 F, m)

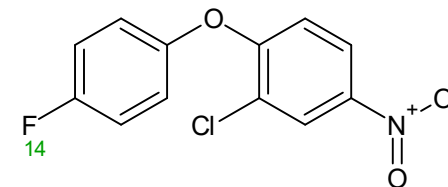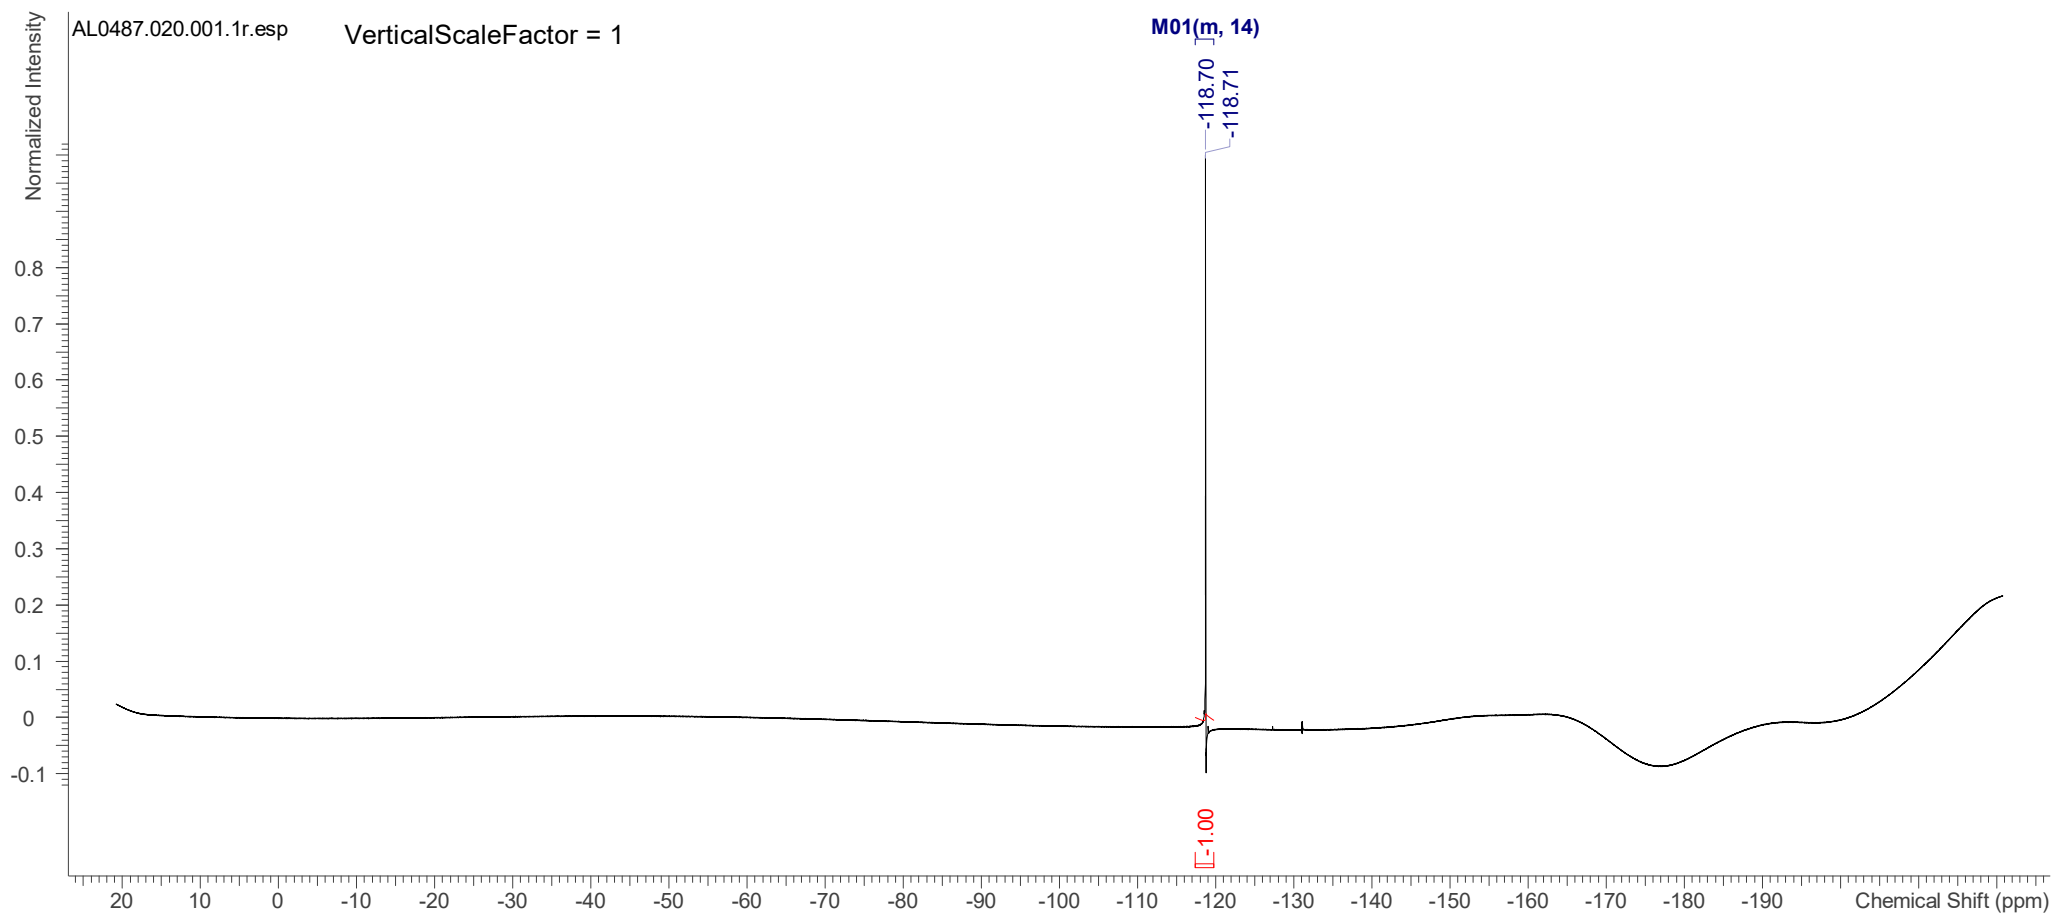

Compound 4i

4/2/2024 8:37:44 AM

|                         |                                      |                                      |
|-------------------------|--------------------------------------|--------------------------------------|
| <b>Number of Nuclei</b> | 7 H's / 7 H's (spectrum / structure) | <b>Multiplets Integrals Sum</b> 7.27 |
|-------------------------|--------------------------------------|--------------------------------------|

<sup>1</sup>H NMR (500 MHz, ACETONITRILE-d<sub>3</sub>, ppm) δ= 8.40 (1 H, dd, J = 5.87, 2.36 Hz), 8.10 (1 H, ddd, J = 8.89, 6.29, 2.52 Hz), 7.67 – 7.58 (2 H, m), 7.12 – 6.98 (3 H, m);

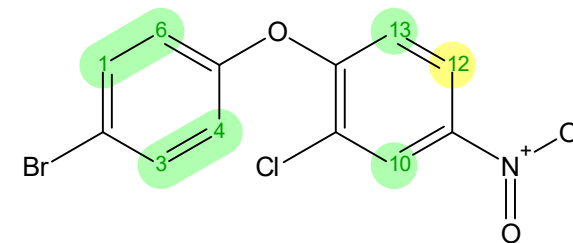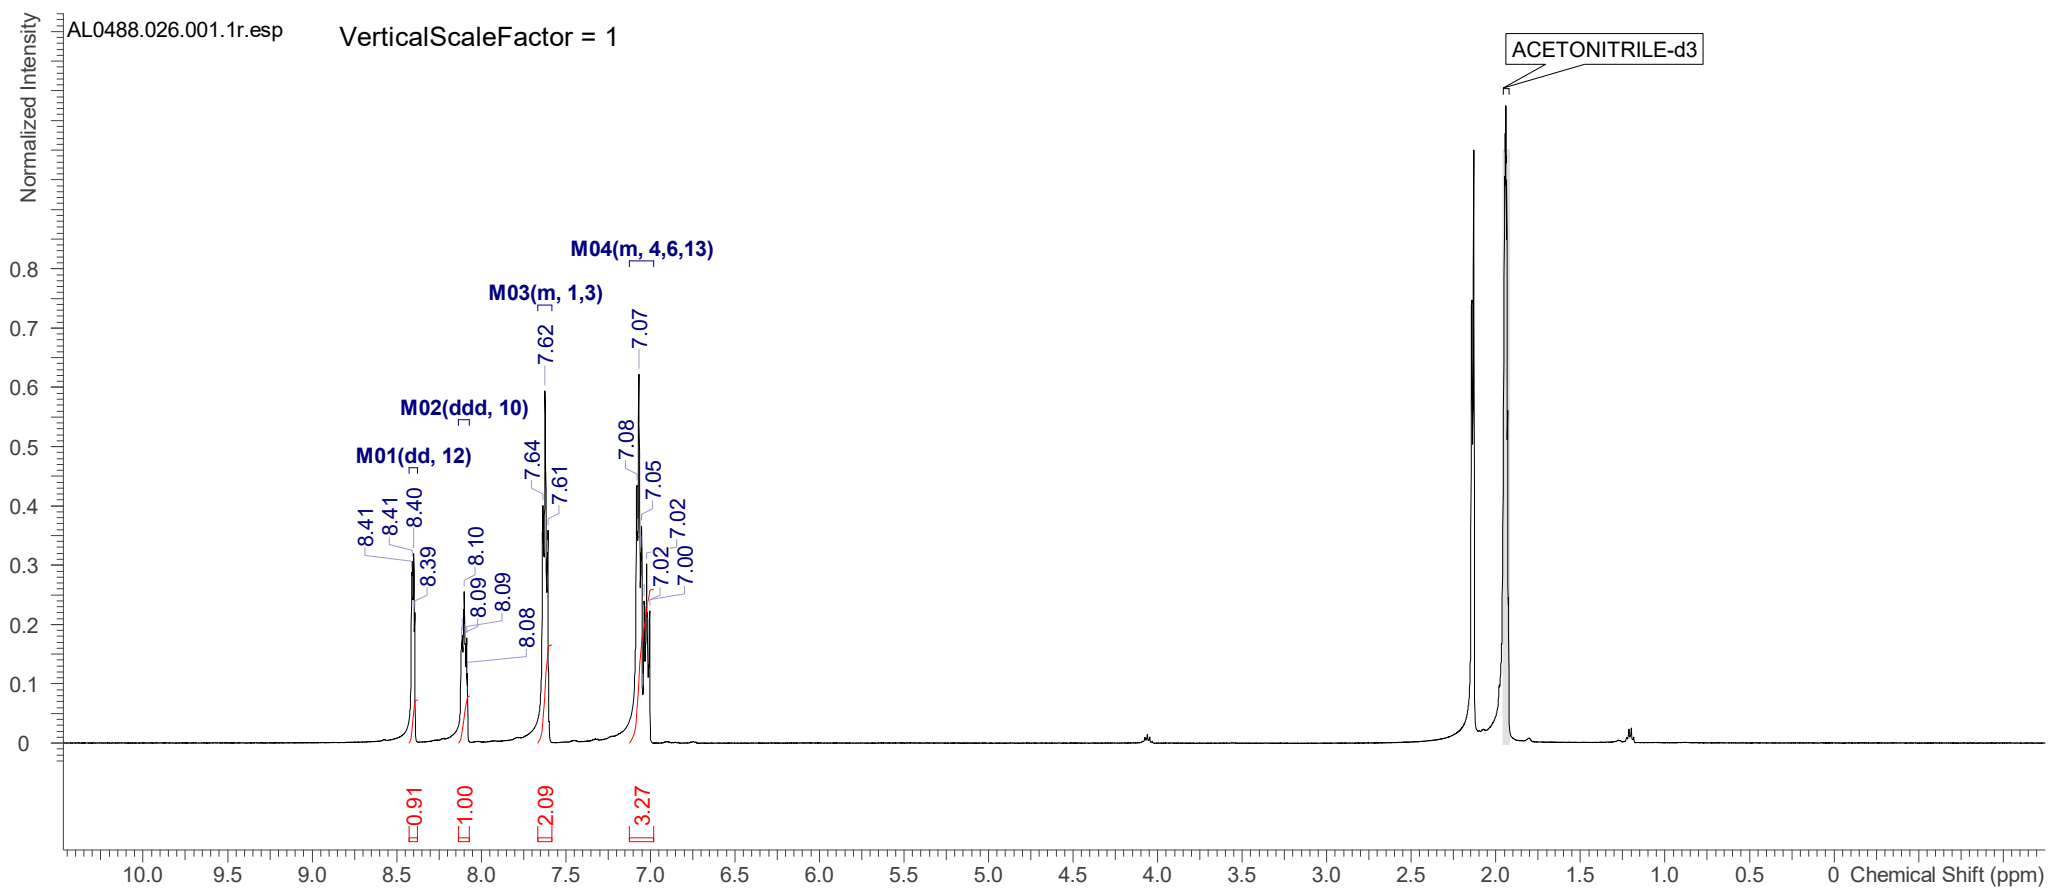

Compound 4i

4/2/2024 8:37:46 AM

Number of Nuclei 12 C's / 12 C's (spectrum / structure) Multiplets Integrals Sum 11.78 Low Signal to Noise Ratio Possible

<sup>13</sup>C NMR (126 MHz, ACETONITRILE-d<sub>3</sub>, ppm) δ= 118.8 (1 C, br s), 119.1 (1 C, s), 122.9 (2 C, s), 125.2 (1 C, s), 125.6 (1 C, s), 127.4 (1 C, s), 134.5 (2 C, s), 144.5 (1 C, s), 155.2 (1 C, s), 159.2 (1 C, d, J = 1.84 Hz)

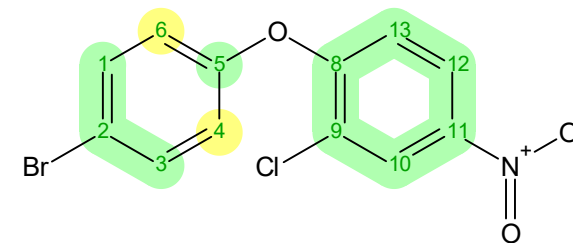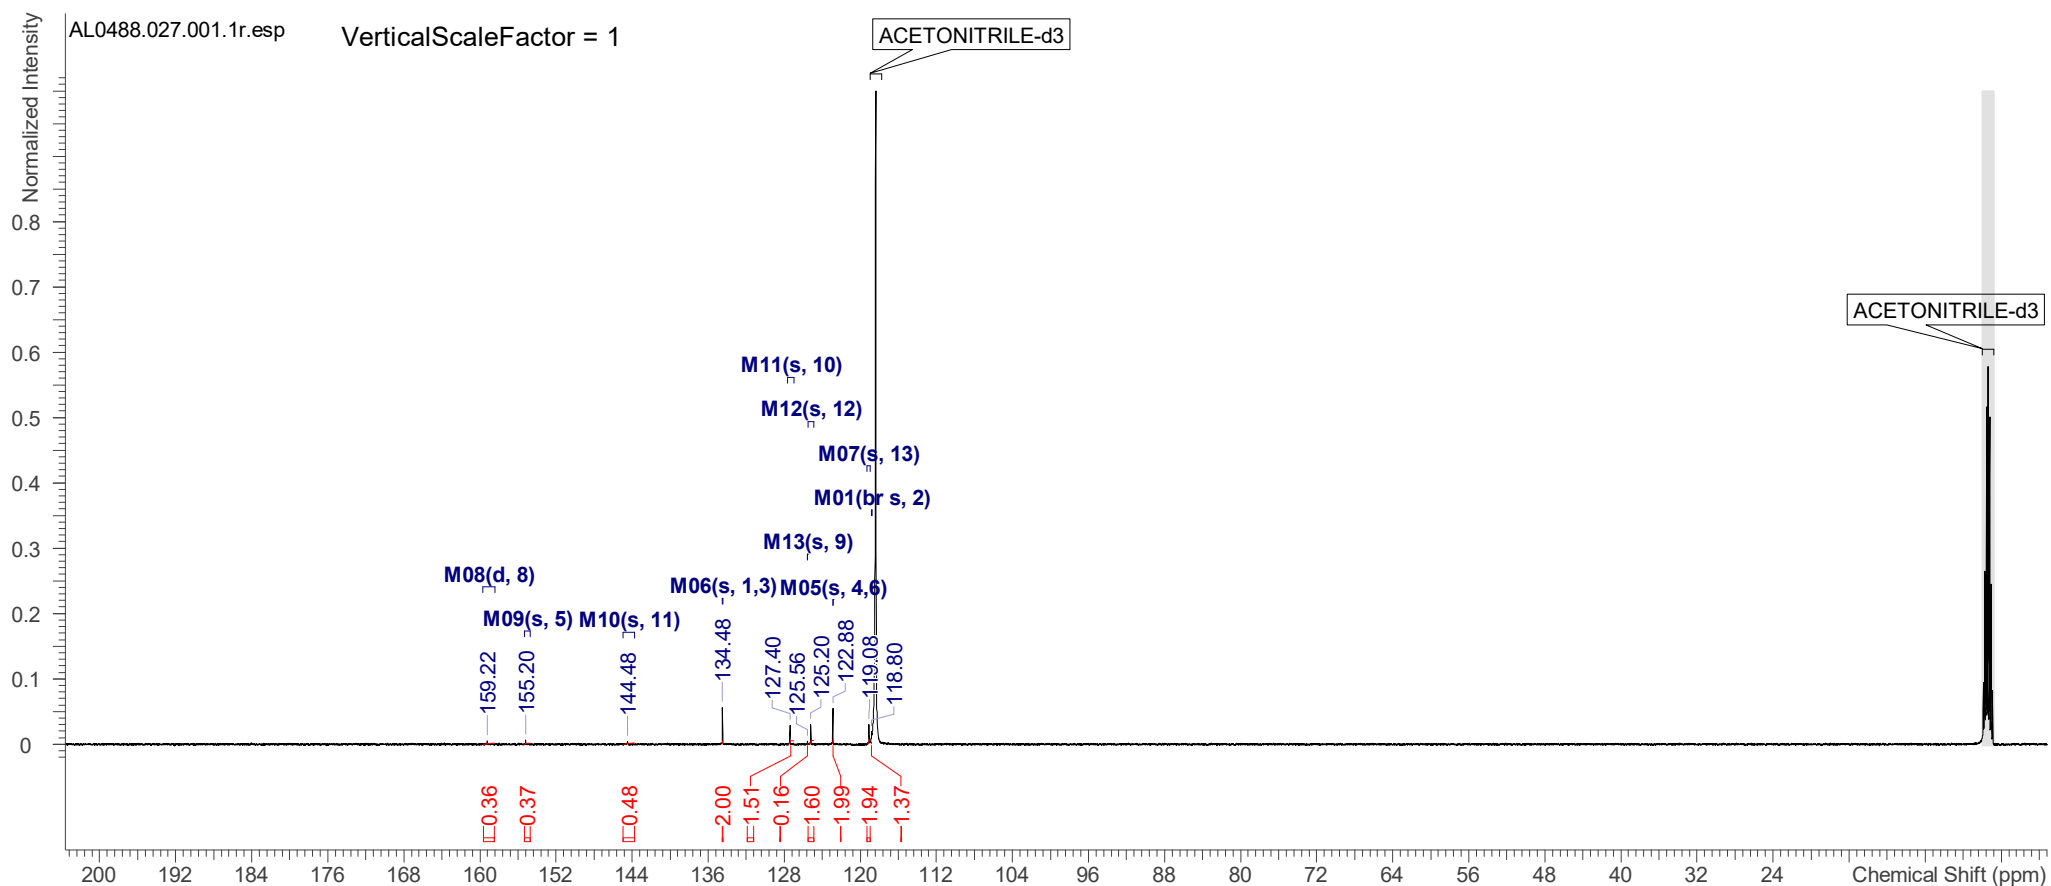

Compound 4j

7/6/2023 2:30:24 PM

|                  |                                      |                          |      |
|------------------|--------------------------------------|--------------------------|------|
| Number of Nuclei | 7 H's / 7 H's (spectrum / structure) | Multiplets Integrals Sum | 7.50 |
|------------------|--------------------------------------|--------------------------|------|

<sup>1</sup>H NMR (500 MHz, ACETONITRILE-d<sub>3</sub>, ppm) δ= 8.40 (1 H, d, J = 2.75 Hz), 8.10 (1 H, dd, J = 9.00, 2.75 Hz), 7.83 – 7.76 (2 H, m), 7.03 (1 H, d, J = 9.16 Hz), 6.95 – 6.90 (2 H, m);

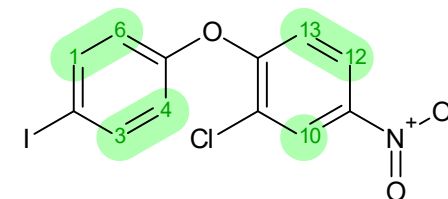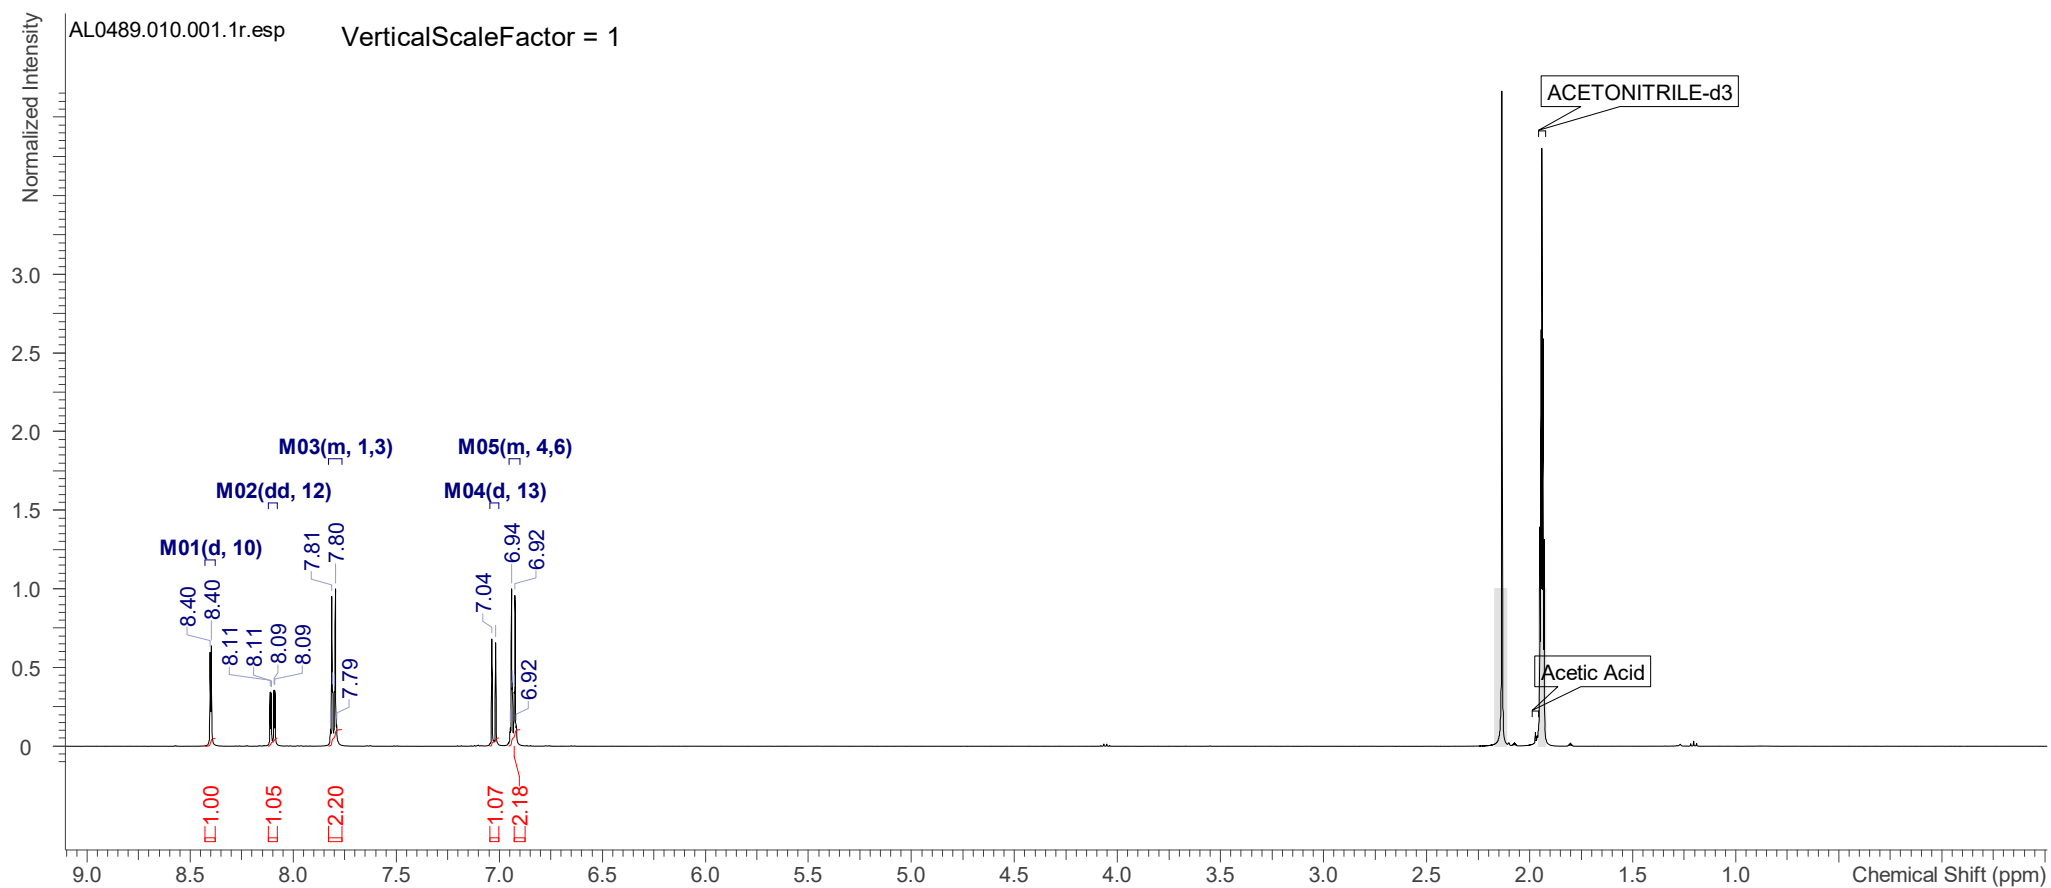

Compound 4j

7/6/2023 2:30:28 PM

Number of Nuclei 12 C's / 12 C's (spectrum / structure) Multiplets Integrals Sum 4.43 Bad Phase or Baseline True

<sup>13</sup>C NMR (126 MHz, ACETONITRILE-d<sub>3</sub>, ppm) δ= 159.1 (1 C, s), 156.0 (1 C, s), 144.5 (1 C, s), 140.5 (2 C, s), 127.4 (1 C, s), 125.7 (1 C, s), 125.2 (1 C, s), 123.1 (2 C, s), 119.3 (1 C, s), 89.5 (1 C, s)

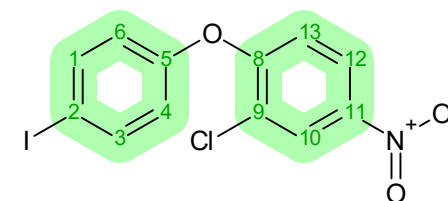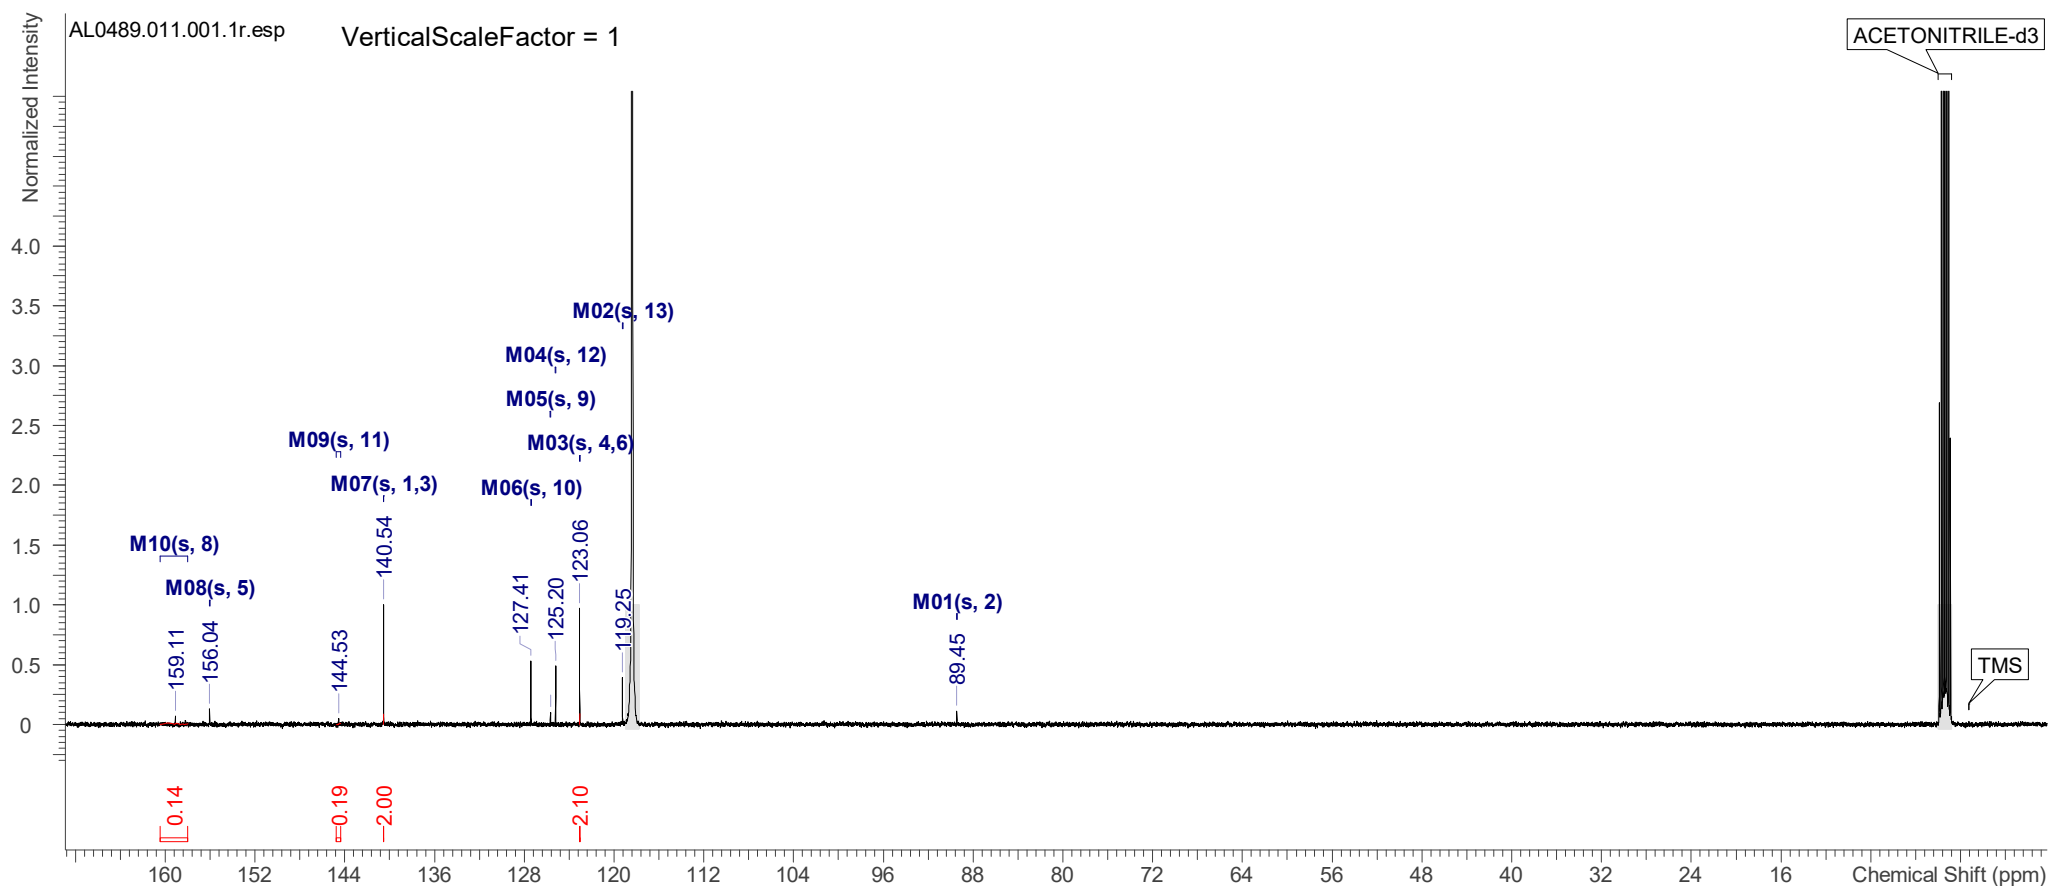

Compound 5a

4/27/2022 8:18:47 AM

|                  |                                      |                          |      |
|------------------|--------------------------------------|--------------------------|------|
| Number of Nuclei | 9 H's / 9 H's (spectrum / structure) | Multiplets Integrals Sum | 8.79 |
|------------------|--------------------------------------|--------------------------|------|

<sup>1</sup>H NMR (500 MHz, CHLOROFORM-d, ppm) δ= 7.26 – 7.22 (2 H, m), 6.90 (1 H, d, J = 8.54 Hz), 6.84 – 6.80 (2 H, m), 6.78 (1 H, d, J = 2.75 Hz), 6.57 (1 H, dd, J = 8.54, 2.75 Hz), 3.69 (2 H, br s);

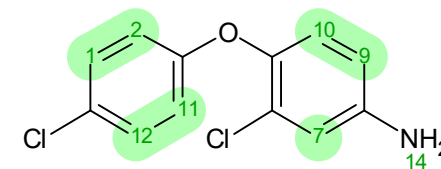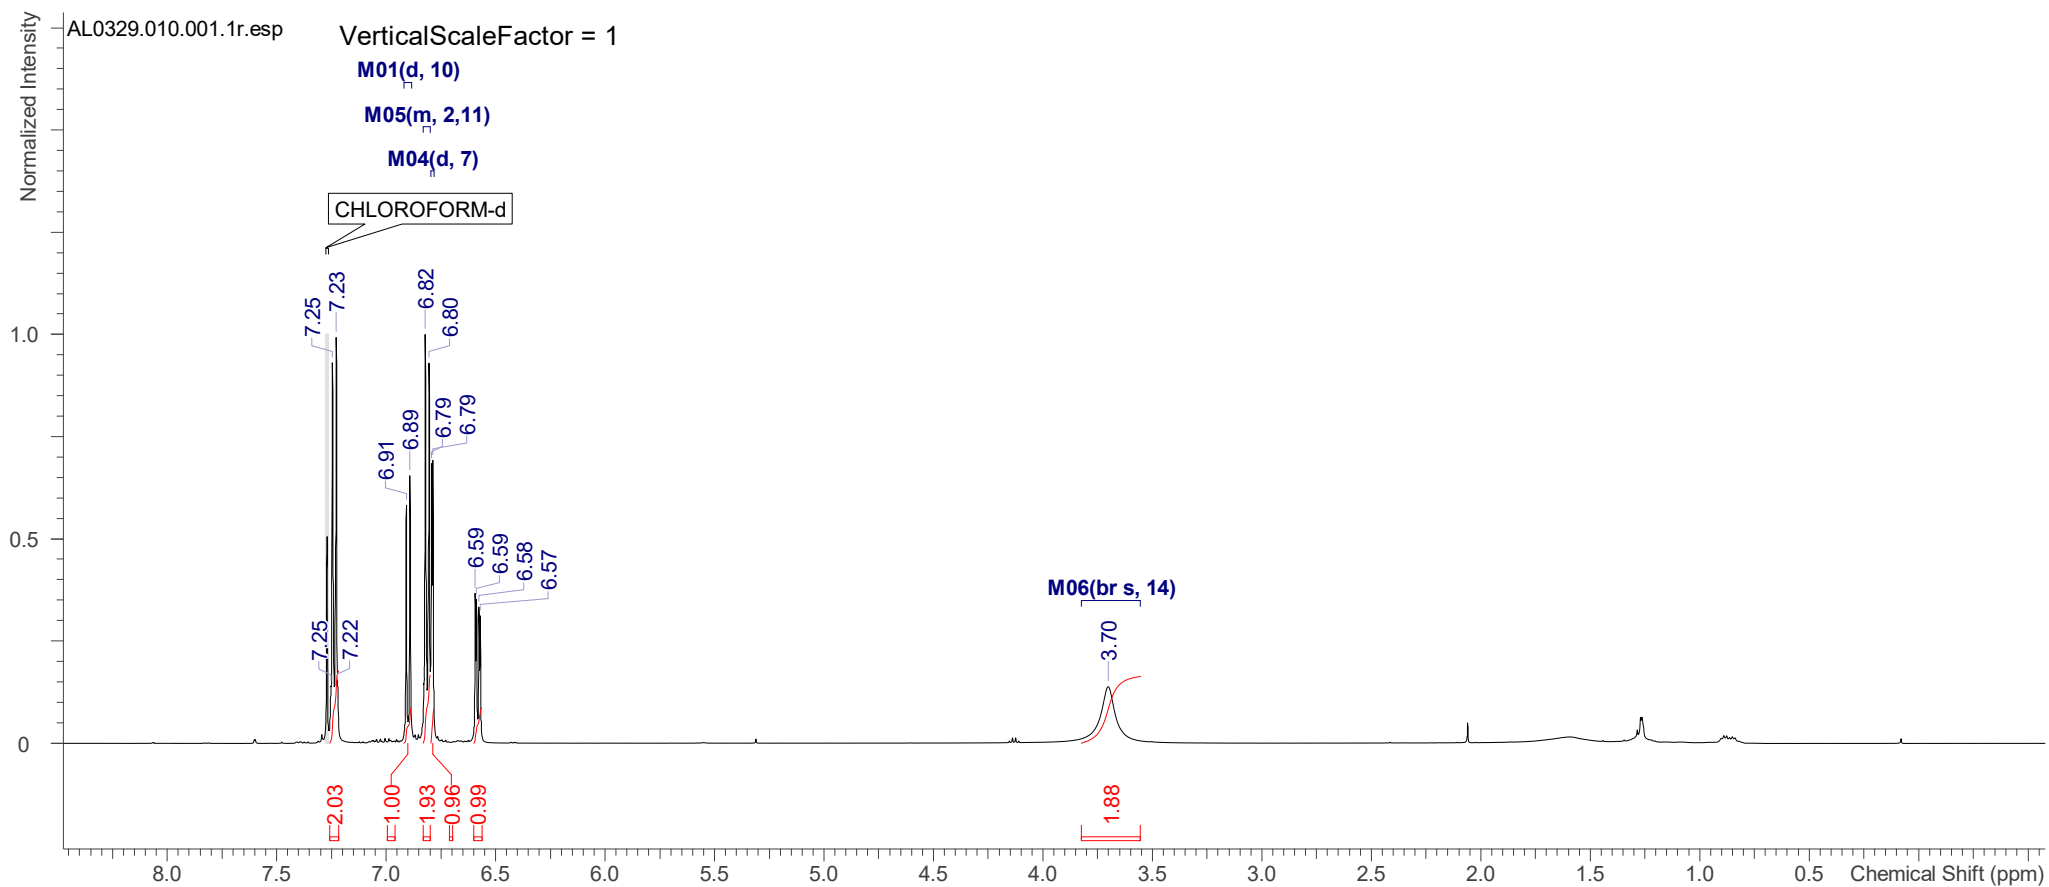

Compound 5a

4/27/2022 8:18:51 AM

|                         |                                        |                                      |
|-------------------------|----------------------------------------|--------------------------------------|
| <b>Number of Nuclei</b> | 12 C's / 12 C's (spectrum / structure) | <b>Multiplets Integrals Sum</b> 0.00 |
|-------------------------|----------------------------------------|--------------------------------------|

<sup>13</sup>C NMR (126 MHz, CHLOROFORM-*d*, ppm) δ= 157.0 (1 C, s), 144.3 (1 C, s), 143.0 (1 C, s), 129.4 (2 C, s), 127.3 (1 C, s), 127.0 (1 C, s), 123.4 (1 C, s), 117.3 (2 C, s), 116.5 (1 C, s), 114.6 (1 C, s)

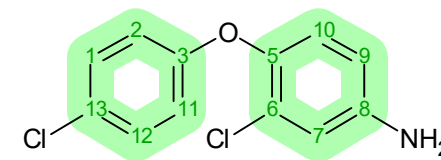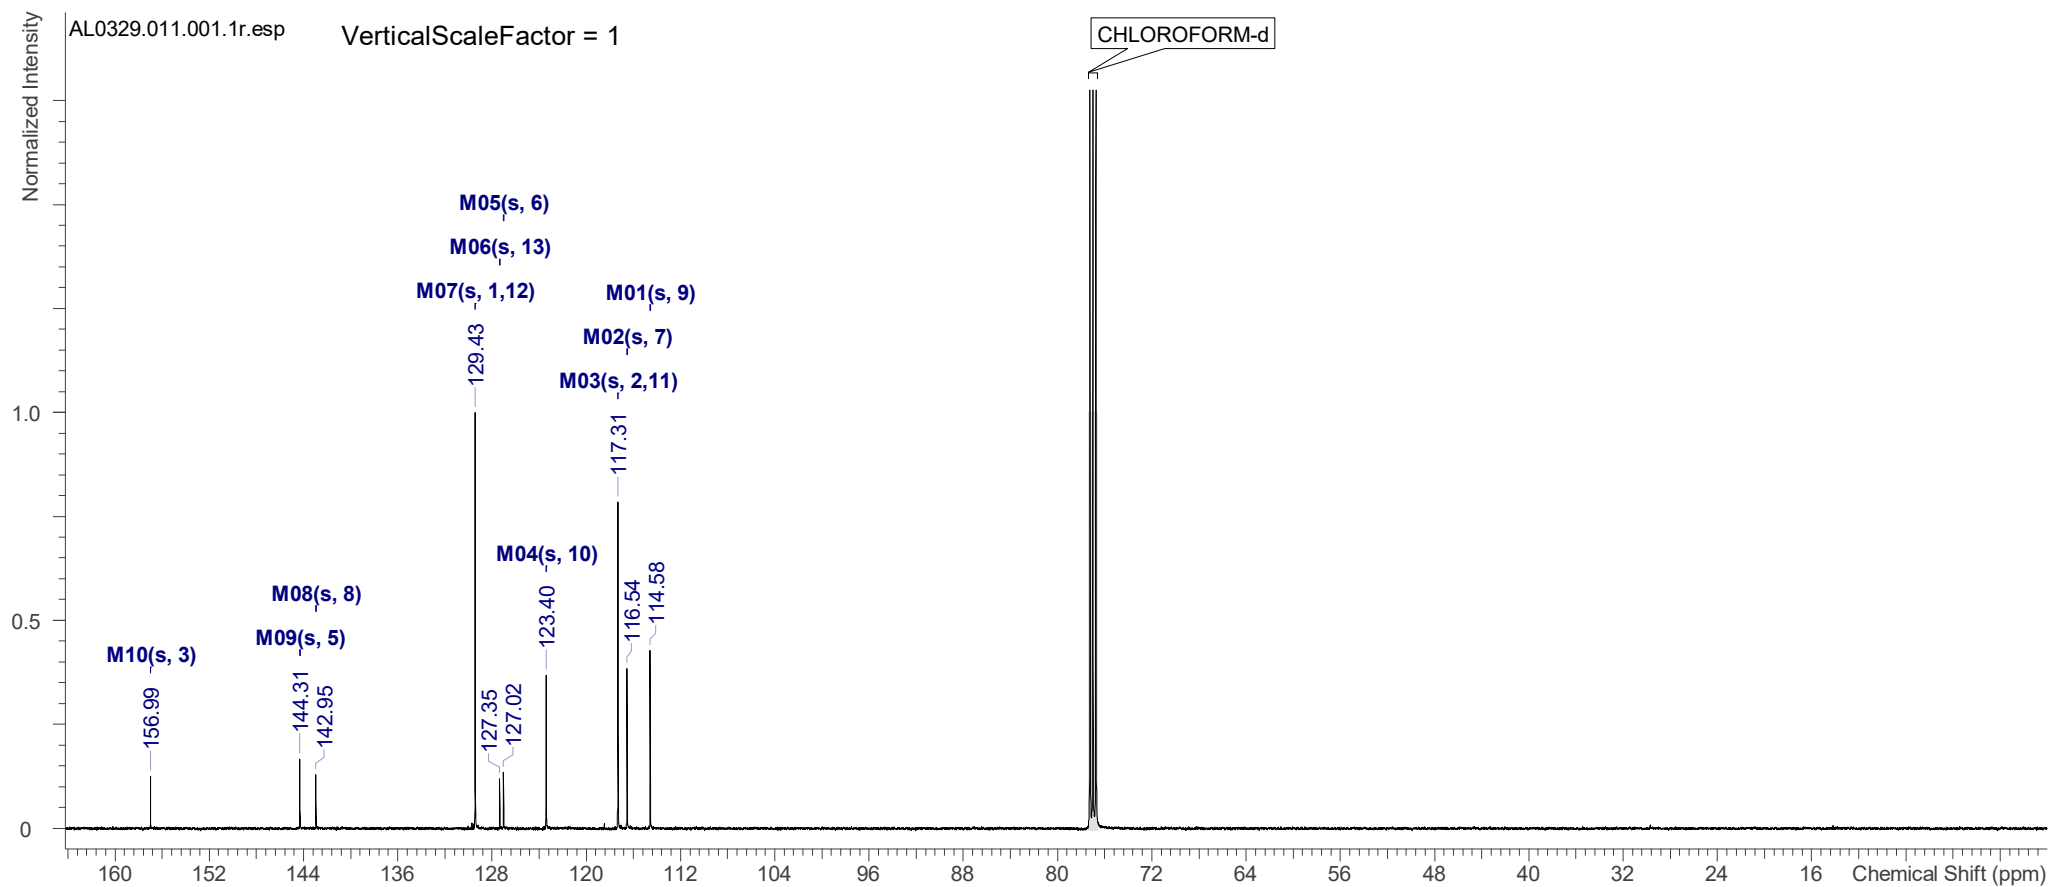

Compound 5b

4/2/2024 8:40:56 AM

|                         |                                        |                                 |      |
|-------------------------|----------------------------------------|---------------------------------|------|
| <b>Number of Nuclei</b> | 11 H's / 10 H's (spectrum / structure) | <b>Multiplets Integrals Sum</b> | 9.38 |
|-------------------------|----------------------------------------|---------------------------------|------|

<sup>1</sup>H NMR (500 MHz, CHLOROFORM-d, ppm) δ= 7.26 – 7.22 (2 H, m), 6.90 (1 H, d, J = 8.54 Hz), 6.84 – 6.80 (2 H, m), 6.78 (1 H, d, J = 2.75 Hz), 6.57 (1 H, dd, J = 8.54, 2.75 Hz), 3.69 (2 H, br s);

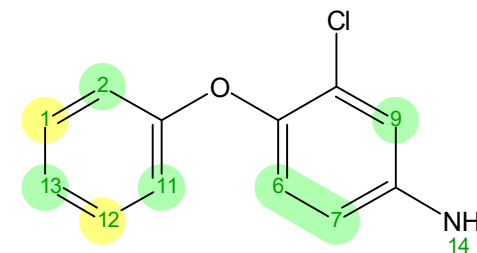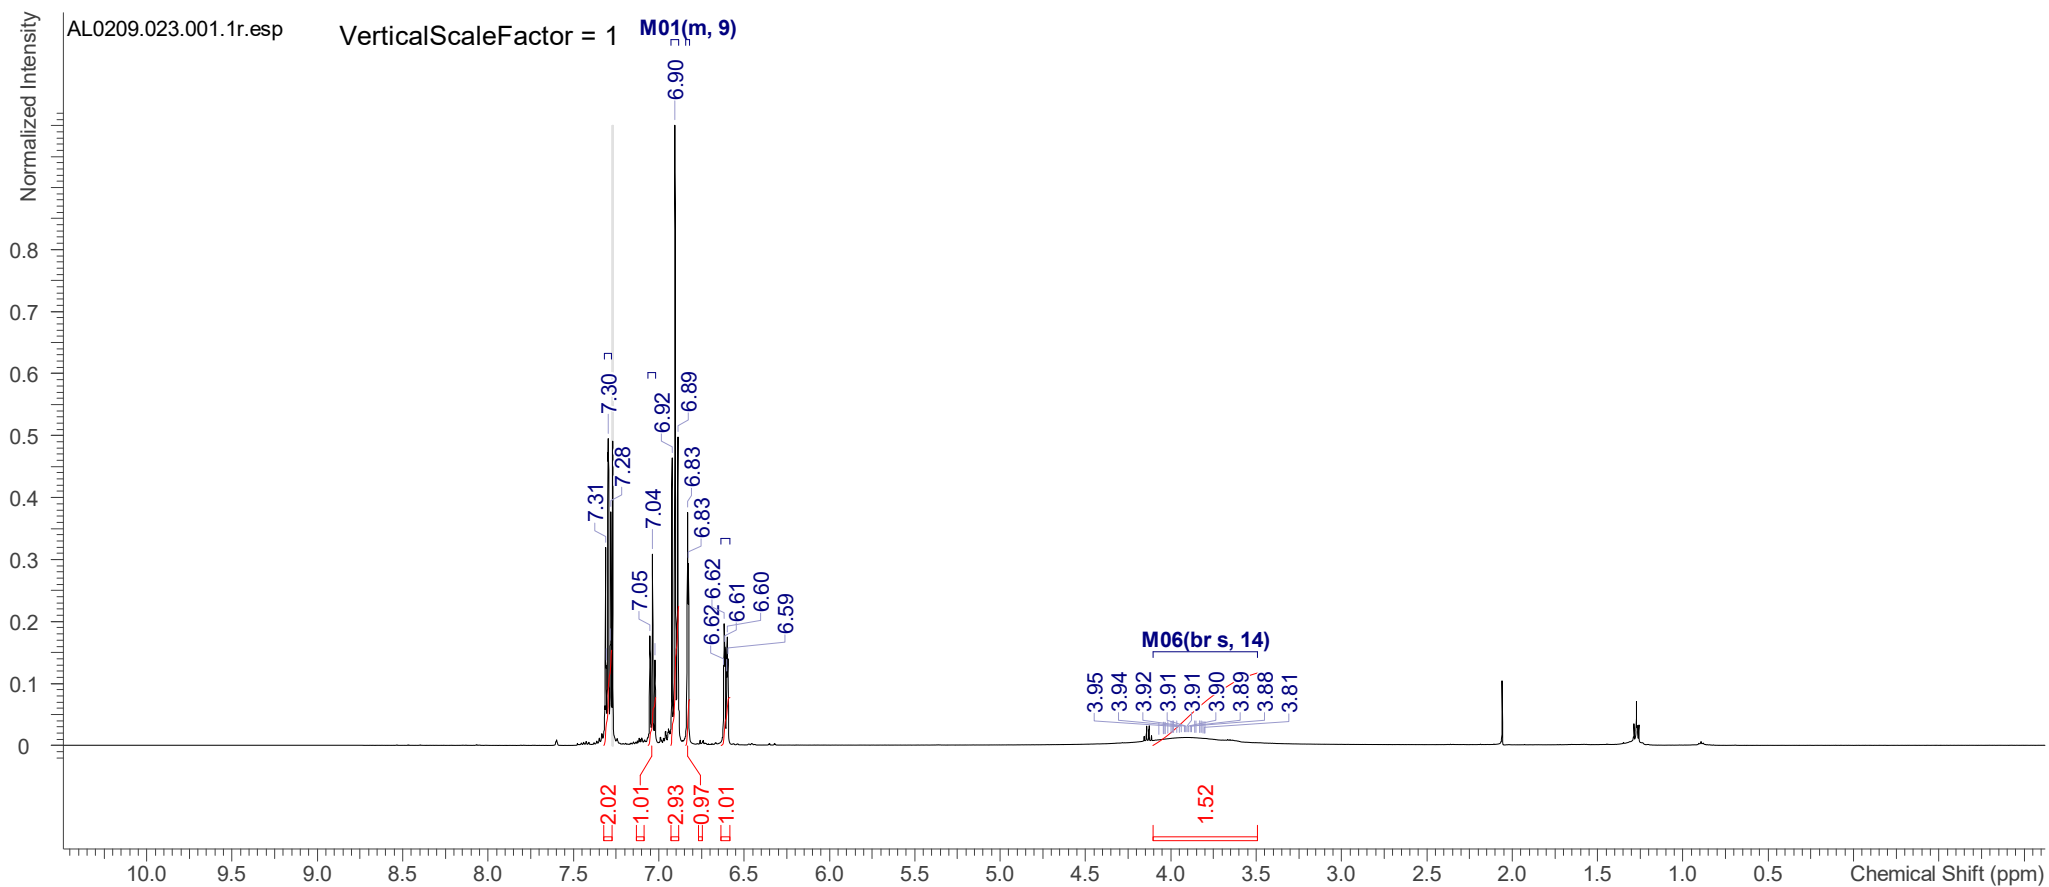

Compound 5b

4/2/2024 8:40:59 AM

|                         |                                        |                                      |
|-------------------------|----------------------------------------|--------------------------------------|
| <b>Number of Nuclei</b> | 12 C's / 12 C's (spectrum / structure) | <b>Multiplets Integrals Sum</b> 9.97 |
|-------------------------|----------------------------------------|--------------------------------------|

<sup>13</sup>C NMR (126 MHz, CHLOROFORM-d, ppm) δ= 157.0 (1 C, s), 144.3 (1 C, s), 143.0 (1 C, s), 129.4 (2 C, s), 127.3 (1 C, s), 127.0 (1 C, s), 123.4 (1 C, s), 117.3 (2 C, s), 116.5 (1 C, s), 114.6 (1 C, s)

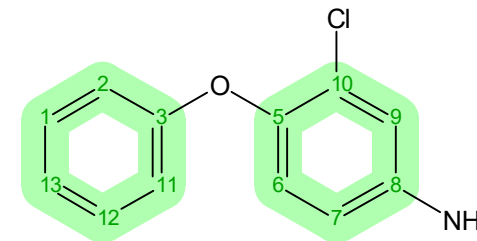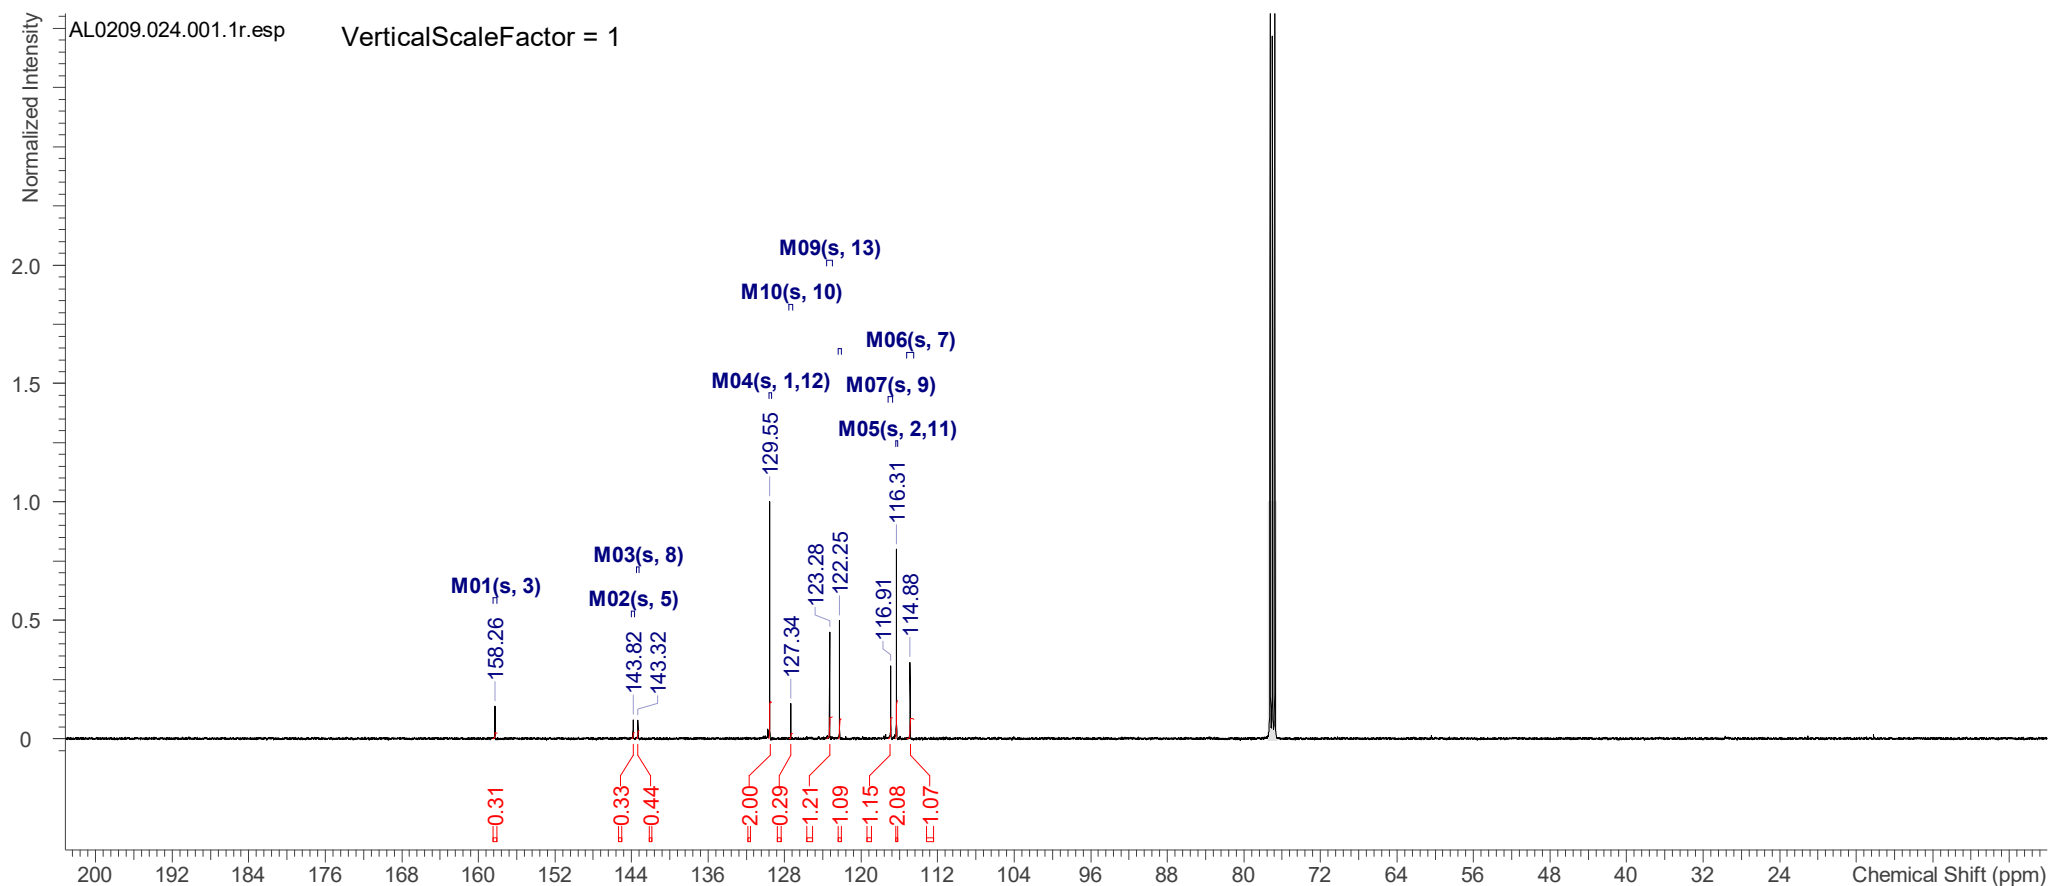

Compound 5c

4/1/2024 6:03:45 PM

|                                       |                                                                |
|---------------------------------------|----------------------------------------------------------------|
| <b>Multiplets Integrals Sum</b> 10.53 | <b>Number of Nuclei</b> 11 H's / 11 H's (spectrum / structure) |
|---------------------------------------|----------------------------------------------------------------|

<sup>1</sup>H NMR (500 MHz, CHLOROFORM-d, ppm) δ= 7.33 – 7.27 (2 H, m), 7.02 (1 H, t, J = 7.32 Hz), 6.96 – 6.92 (2 H, m), 6.91 – 6.86 (2 H, m), 6.71 – 6.66 (2 H, m), 3.59 (2 H, br s);

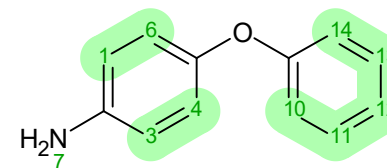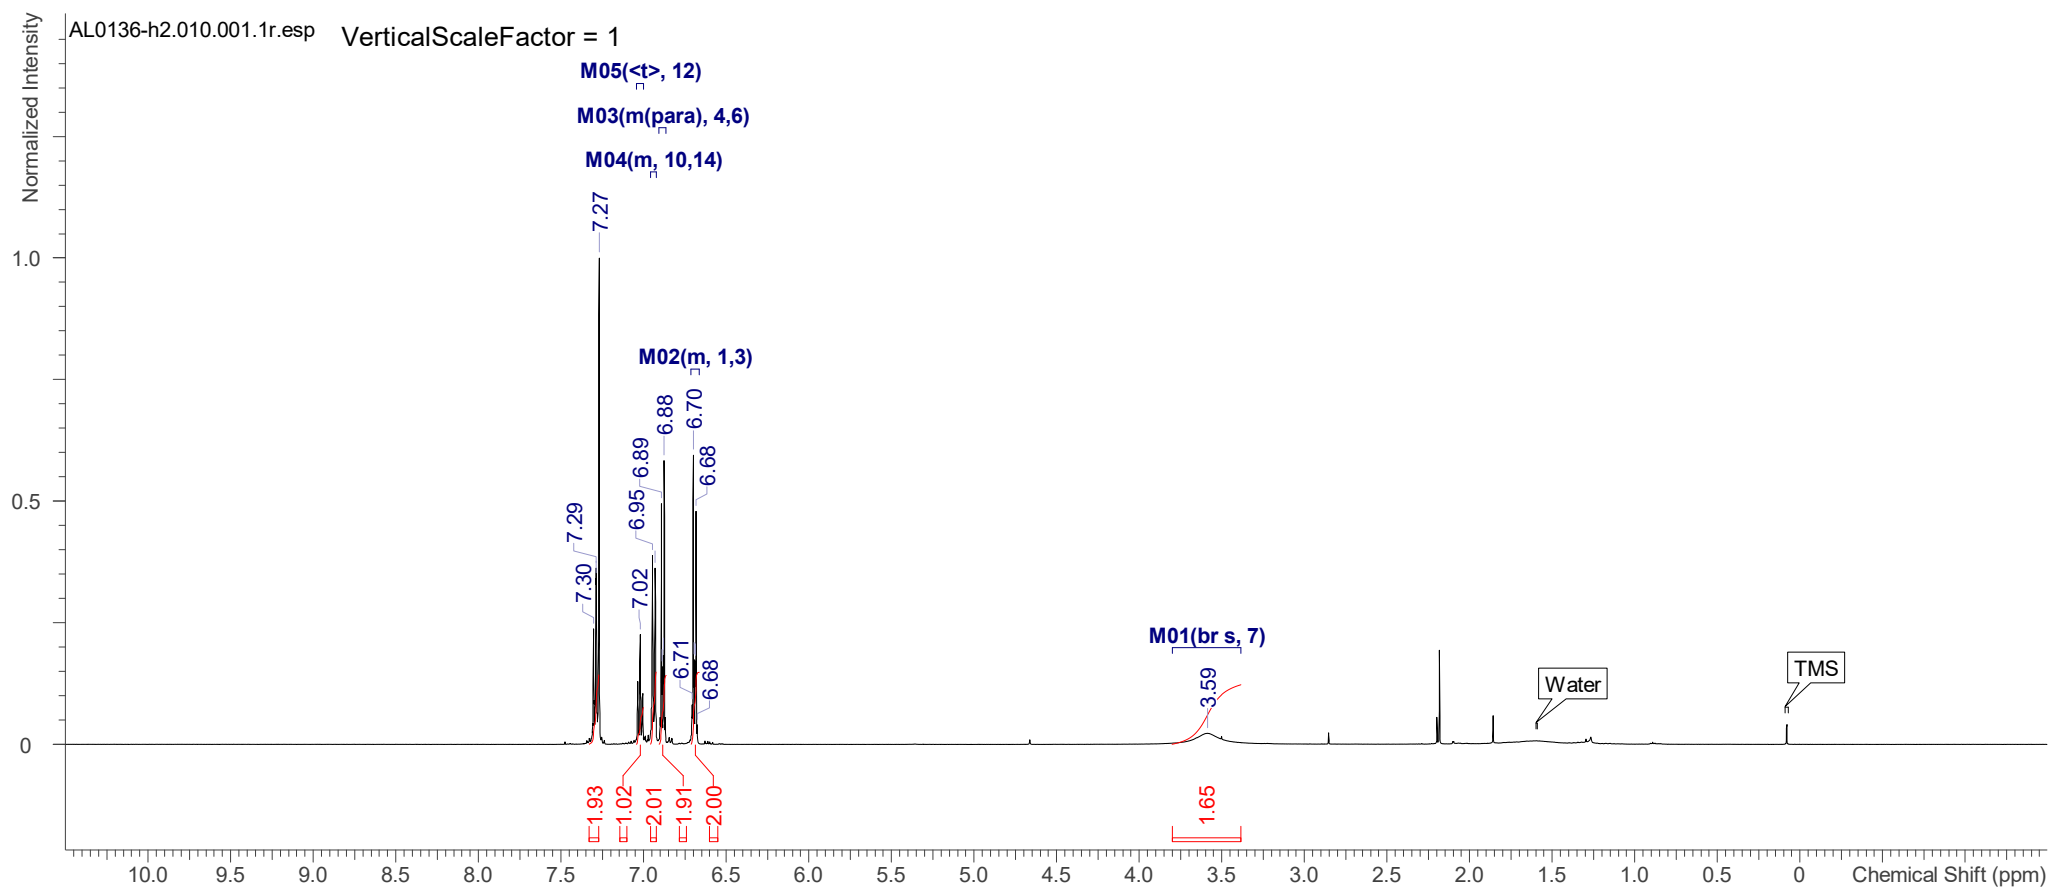

Compound 5c

4/1/2024 6:04:01 PM

|                               |                                                         |
|-------------------------------|---------------------------------------------------------|
| Multiplets Integrals Sum 0.00 | Number of Nuclei 12 C's / 12 C's (spectrum / structure) |
|-------------------------------|---------------------------------------------------------|

<sup>13</sup>C NMR (126 MHz, CHLOROFORM-d, ppm) δ= 158.9 (1 C, s), 148.6 (1 C, s), 142.7 (1 C, s), 129.0 (2 C, s), 122.0 (1 C, s), 121.1 (2 C, s), 117.2 (2 C, s), 116.2 (2 C, s)

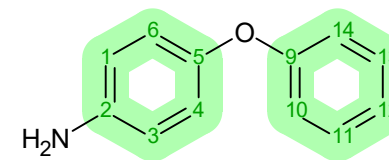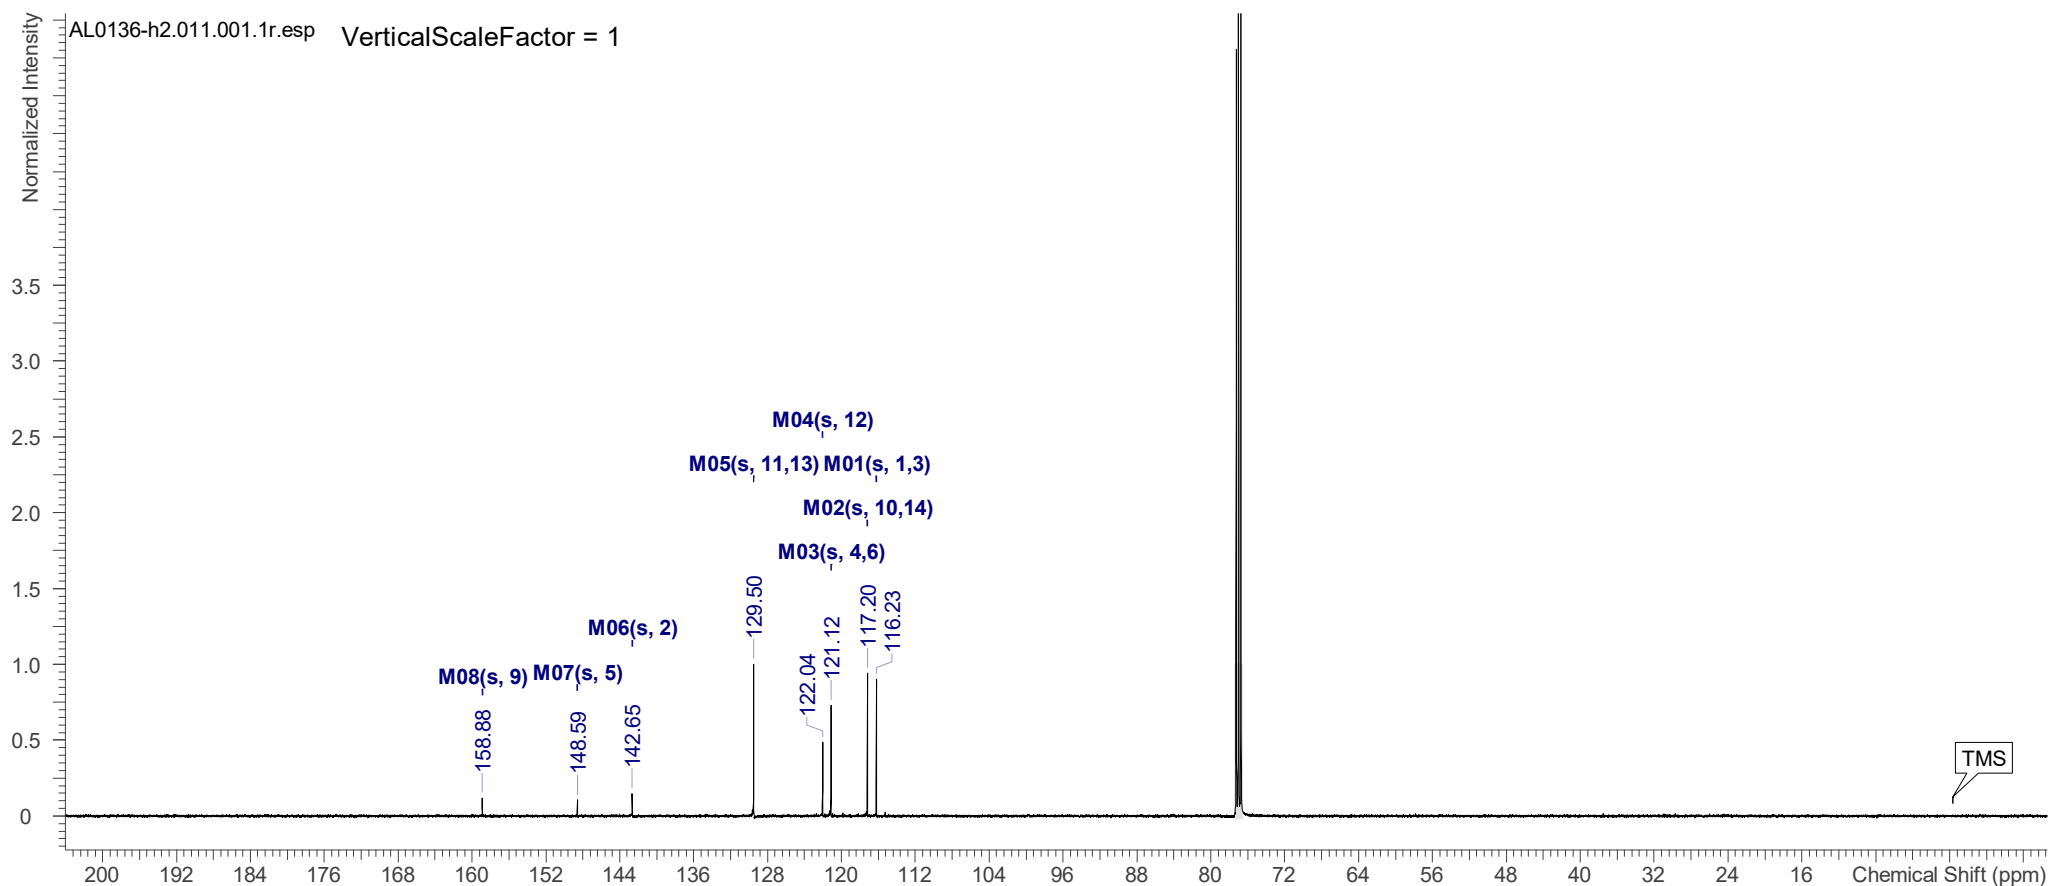

Compound 5d

2/28/2022 9:16:16 AM

|                         |                                      |                                      |
|-------------------------|--------------------------------------|--------------------------------------|
| <b>Number of Nuclei</b> | 9 H's / 9 H's (spectrum / structure) | <b>Multiplets Integrals Sum</b> 8.86 |
|-------------------------|--------------------------------------|--------------------------------------|

<sup>1</sup>H NMR (500 MHz, CHLOROFORM-*d*, ppm) δ= 7.31 – 7.28 (2 H, m), 6.94 – 6.90 (3 H, m), 6.85 – 6.83 (2 H, m), 3.79 (2 H, br s);

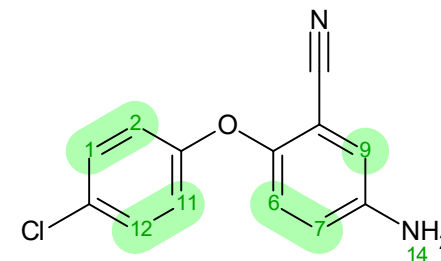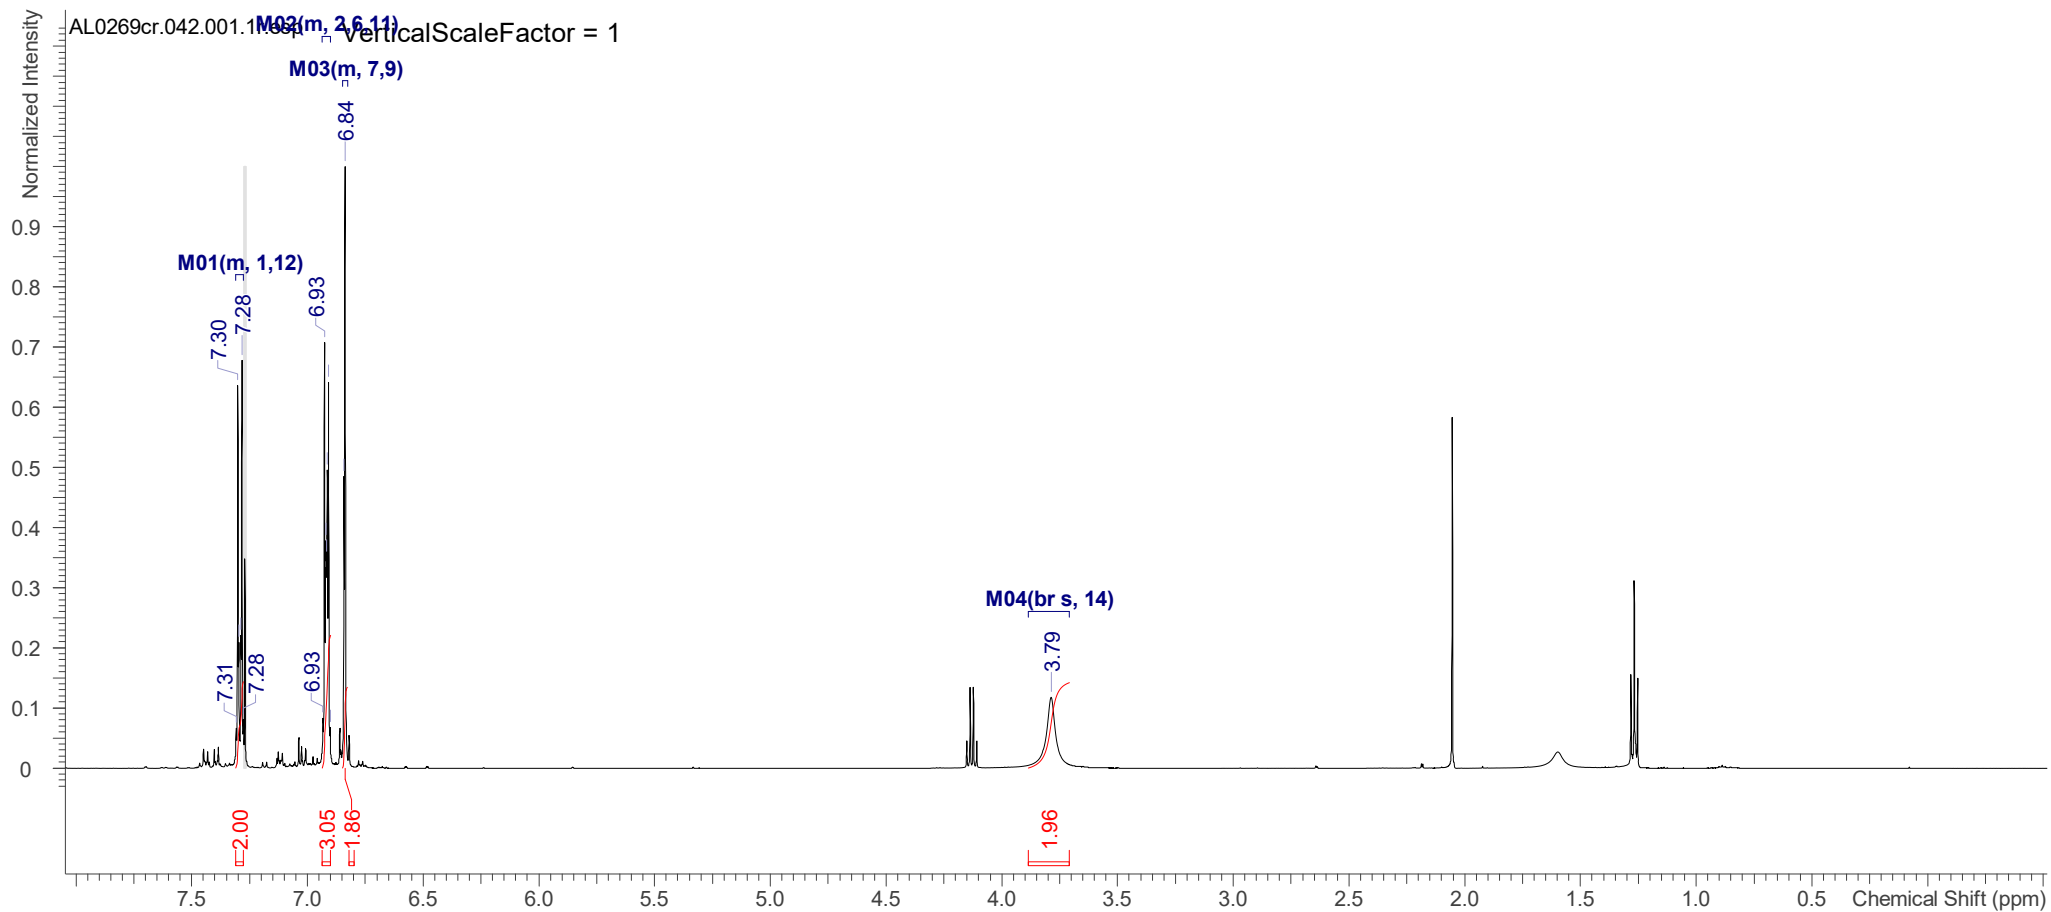

Compound 5d

2/28/2022 9:16:22 AM

|                         |                                        |                                      |
|-------------------------|----------------------------------------|--------------------------------------|
| <b>Number of Nuclei</b> | 13 C's / 13 C's (spectrum / structure) | <b>Multiplets Integrals Sum</b> 0.00 |
|-------------------------|----------------------------------------|--------------------------------------|

<sup>13</sup>C NMR (126 MHz, CHLOROFORM-*d*, ppm) δ= 155.8 (1 C, s), 150.3 (1 C, s), 143.0 (1 C, s), 129.8 (2 C, s), 128.6 (1 C, s), 120.9 (1 C, s), 120.9 (1 C, s), 119.2 (2 C, s), 118.4 (1 C, s), 115.8 (1 C, s), 105.7 (1 C, s)

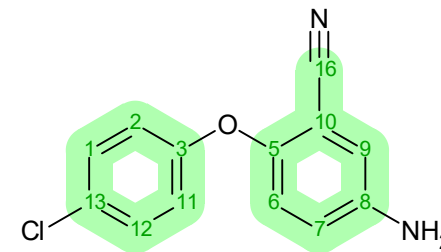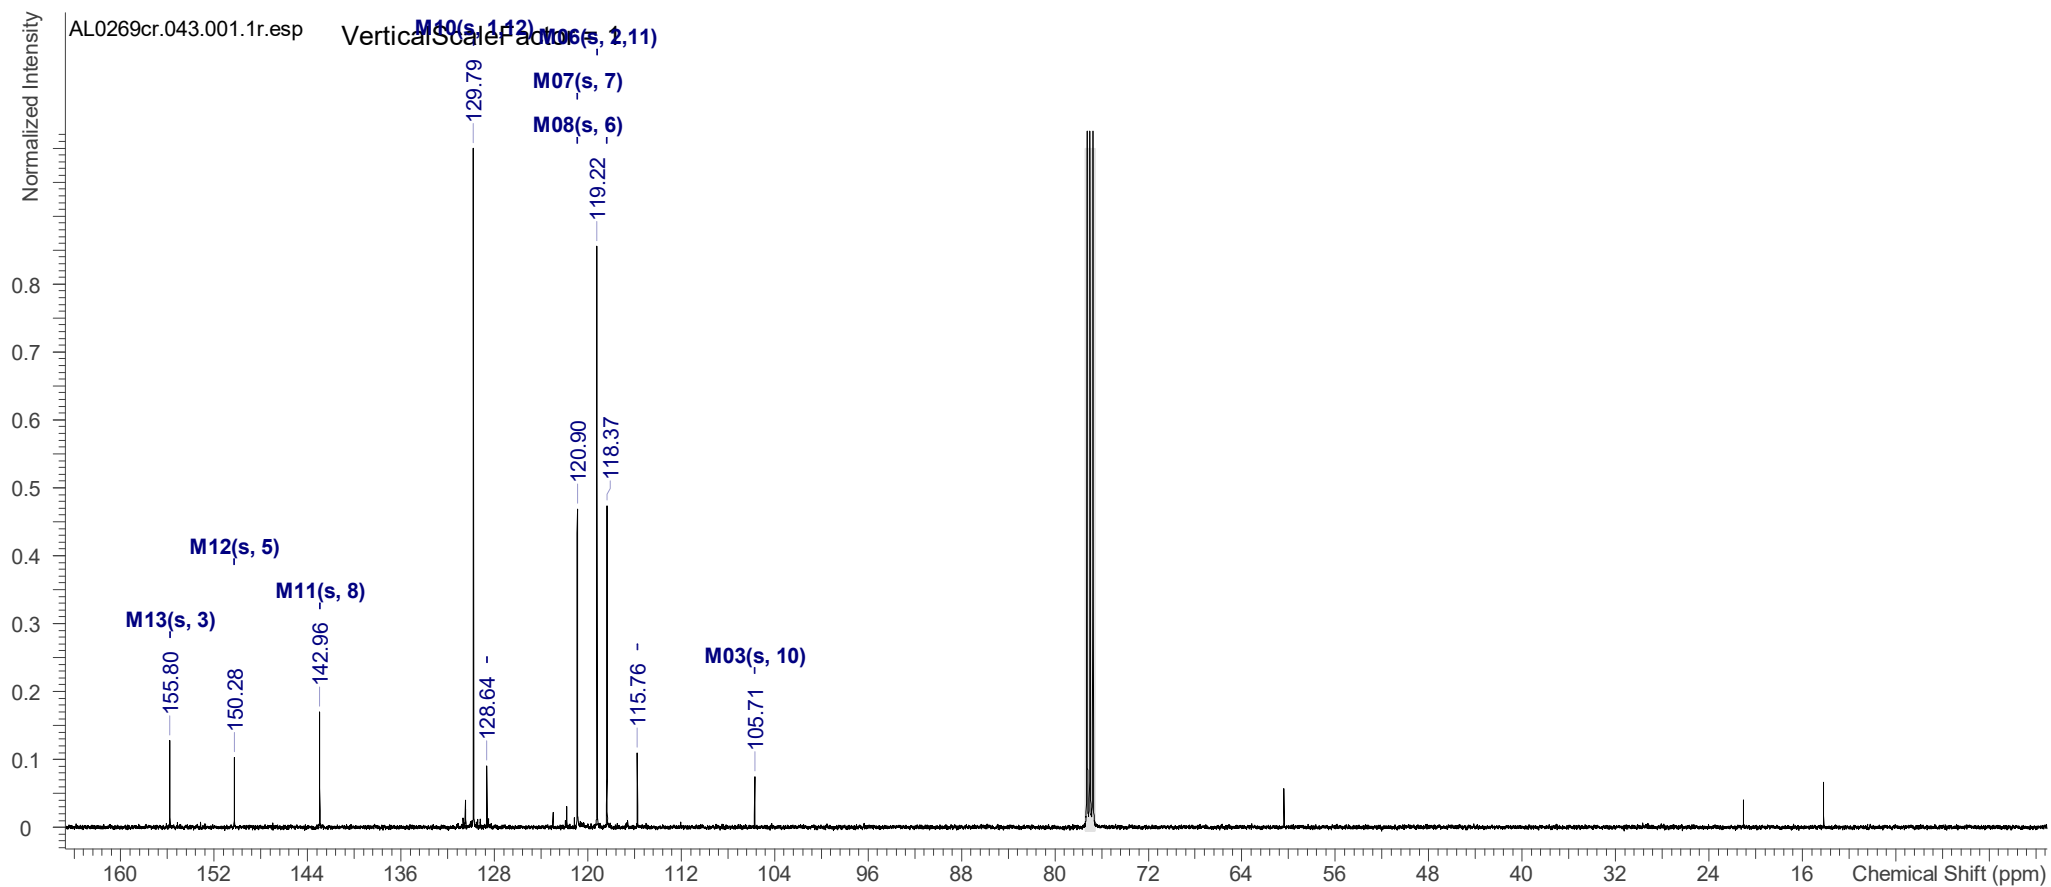

Compound 5e

4/2/2024 8:43:45 AM

|                  |                                      |                          |      |
|------------------|--------------------------------------|--------------------------|------|
| Number of Nuclei | 9 H's / 9 H's (spectrum / structure) | Multiplets Integrals Sum | 9.07 |
|------------------|--------------------------------------|--------------------------|------|

<sup>1</sup>H NMR (500 MHz, CHLOROFORM-d, ppm) δ= 7.65 – 7.60 (2 H, m), 7.02 – 6.99 (2 H, m), 6.97 – 6.94 (2 H, m), 6.92 – 6.89 (1 H, m), 3.90 (2 H, br s);

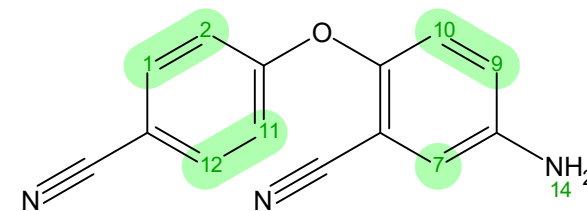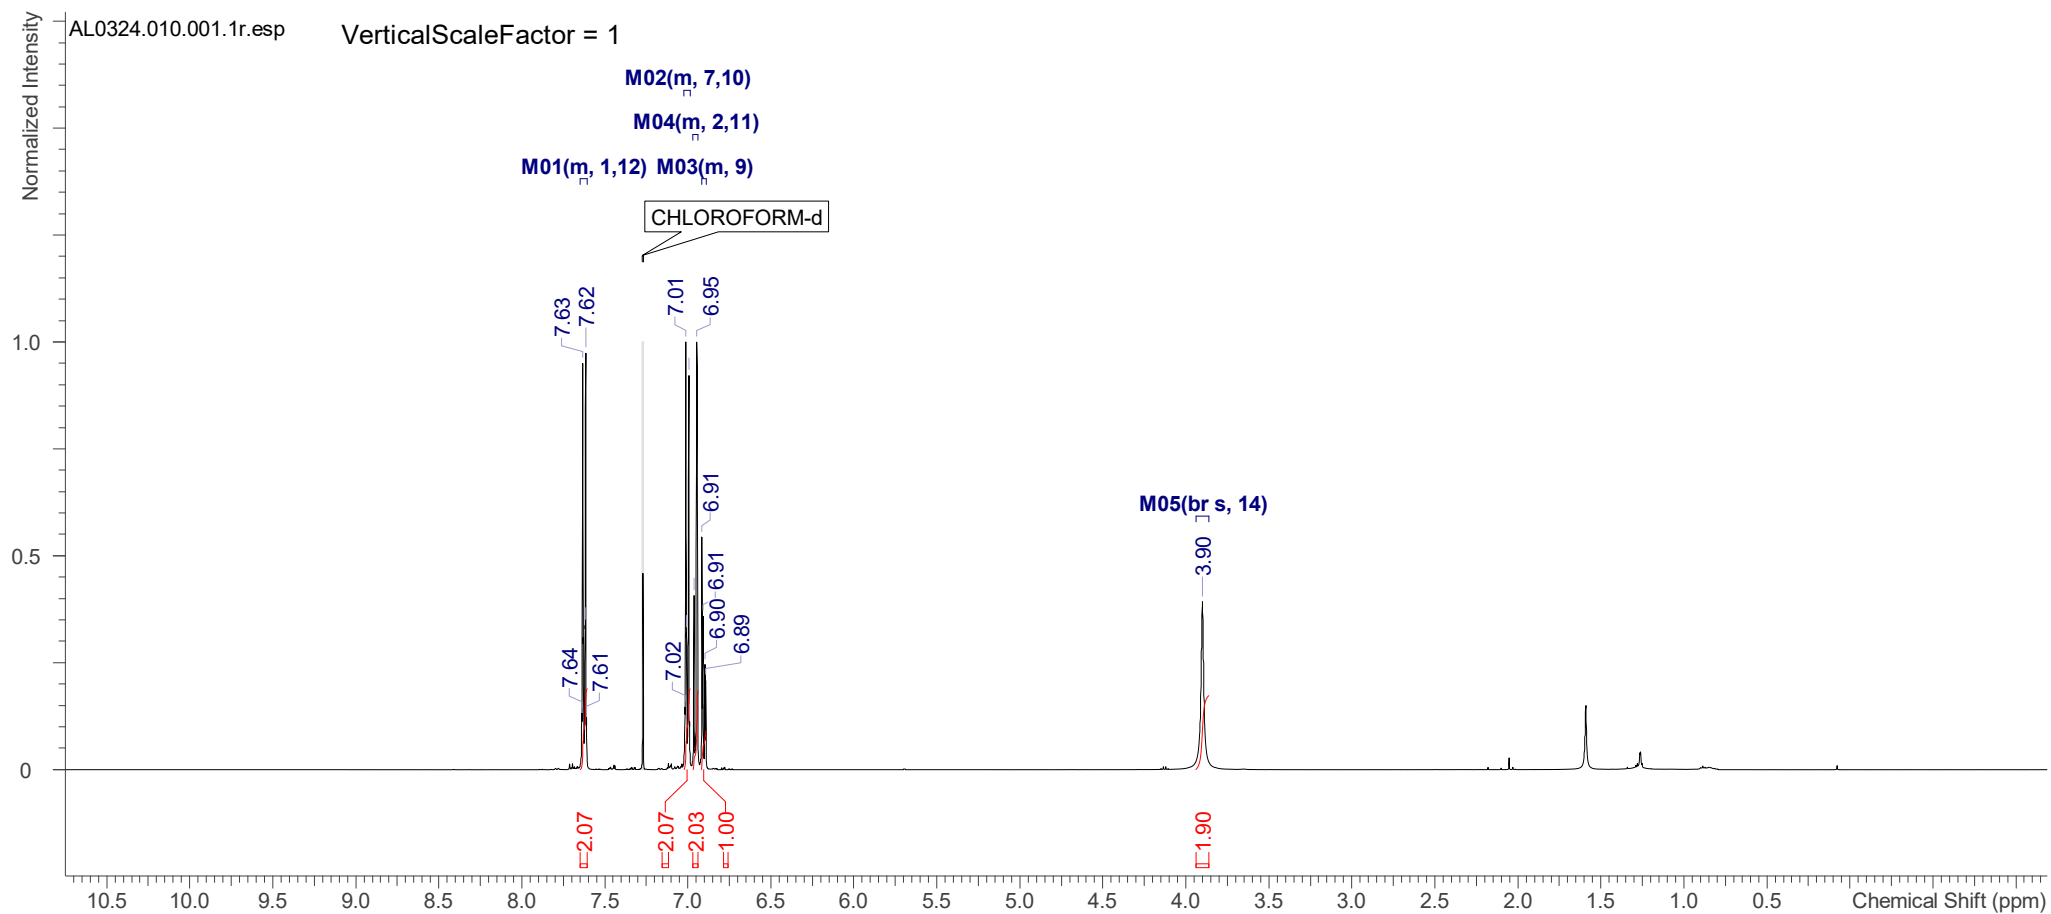

Compound 5e

4/2/2024 8:43:48 AM

|                         |                                        |                                      |
|-------------------------|----------------------------------------|--------------------------------------|
| <b>Number of Nuclei</b> | 14 C's / 14 C's (spectrum / structure) | <b>Multiplets Integrals Sum</b> 0.00 |
|-------------------------|----------------------------------------|--------------------------------------|

<sup>13</sup>C NMR (126 MHz, CHLOROFORM-d, ppm) δ= 161.2 (1 C, s), 147.8 (1 C, s), 144.2 (1 C, s), 134.3 (2 C, s), 122.6 (1 C, s), 120.8 (1 C, s), 118.6 (1 C, s), 118.4 (1 C, s), 117.3 (2 C, s), 115.2 (1 C, s), 106.9 (1 C, s), 106.5 (1 C, s)

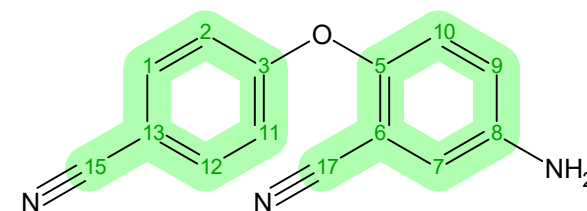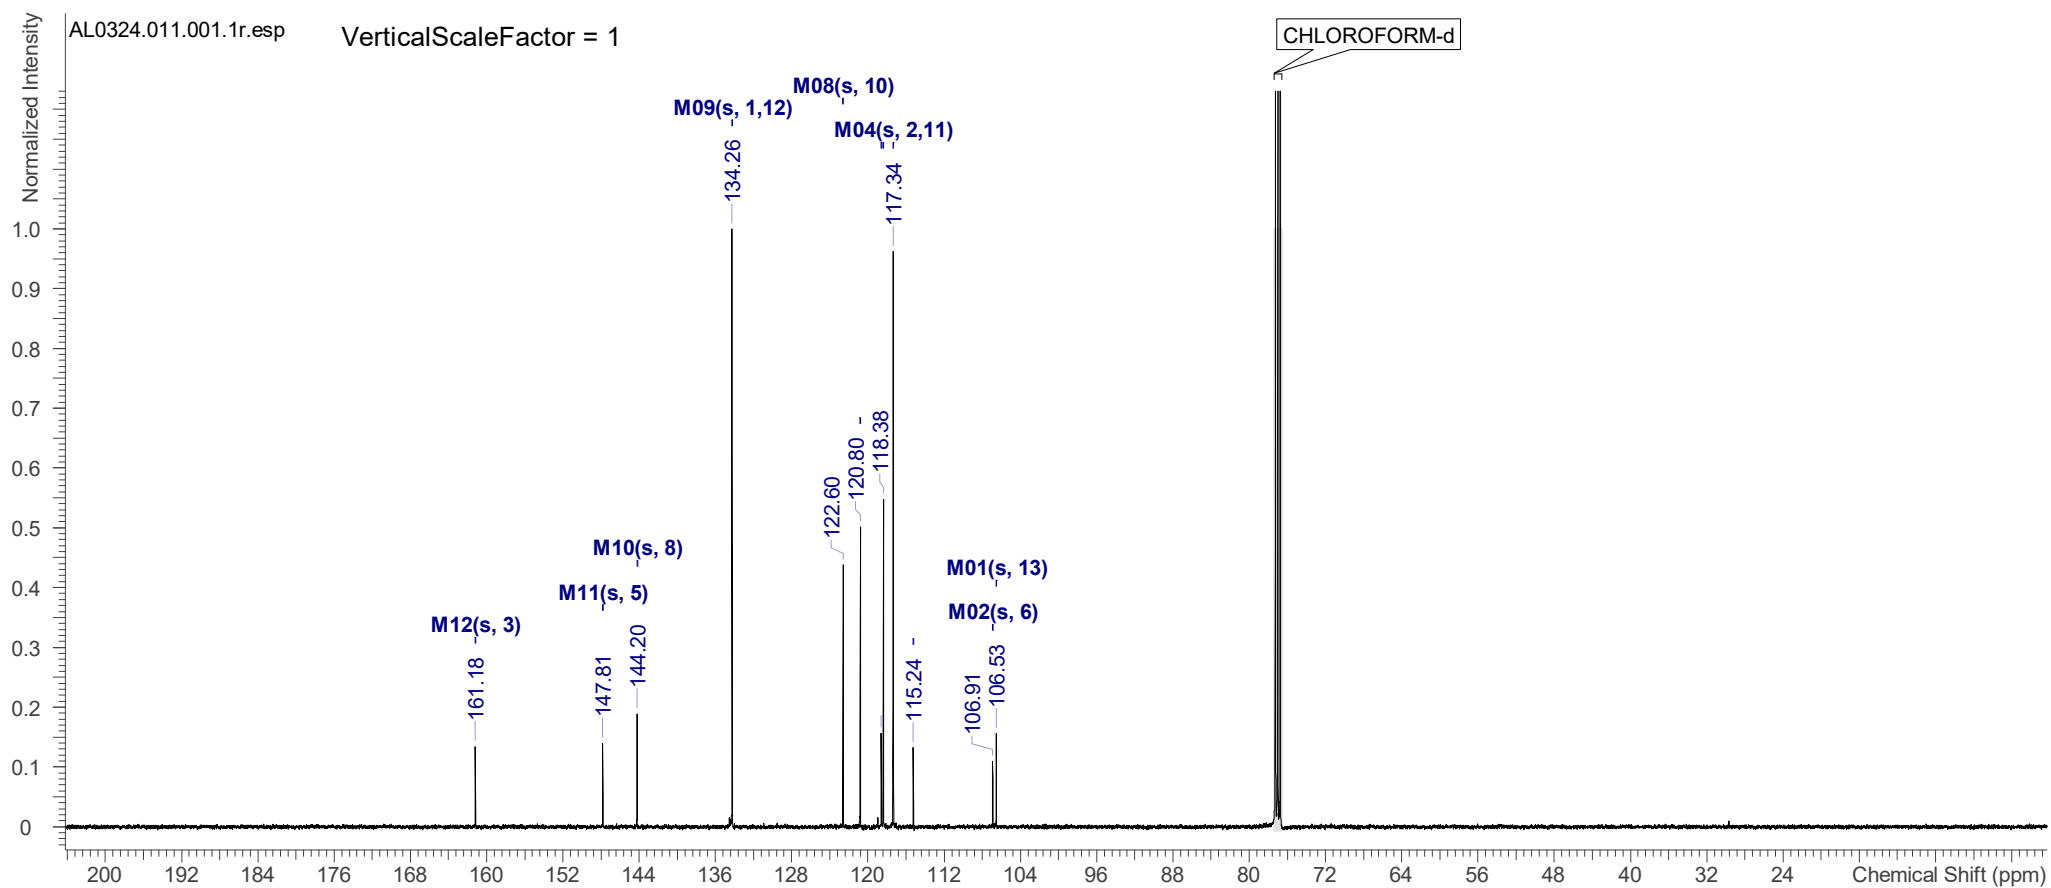

Compound 5f

4/2/2024 8:52:59 AM

|                         |                                      |                                      |
|-------------------------|--------------------------------------|--------------------------------------|
| <b>Number of Nuclei</b> | 7 H's / 9 H's (spectrum / structure) | <b>Multiplets Integrals Sum</b> 6.99 |
|-------------------------|--------------------------------------|--------------------------------------|

<sup>1</sup>H NMR (500 MHz, METHANOL-d<sub>4</sub>, ppm) δ= 7.35 – 7.30 (1 H, m), 7.18 (2 H, dd, J = 4.43, 1.83 Hz), 7.16 – 7.10 (2 H, m), 7.07 – 7.01 (2 H, m);

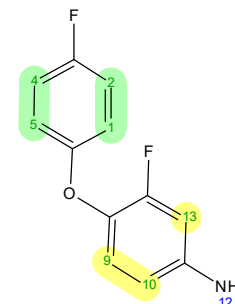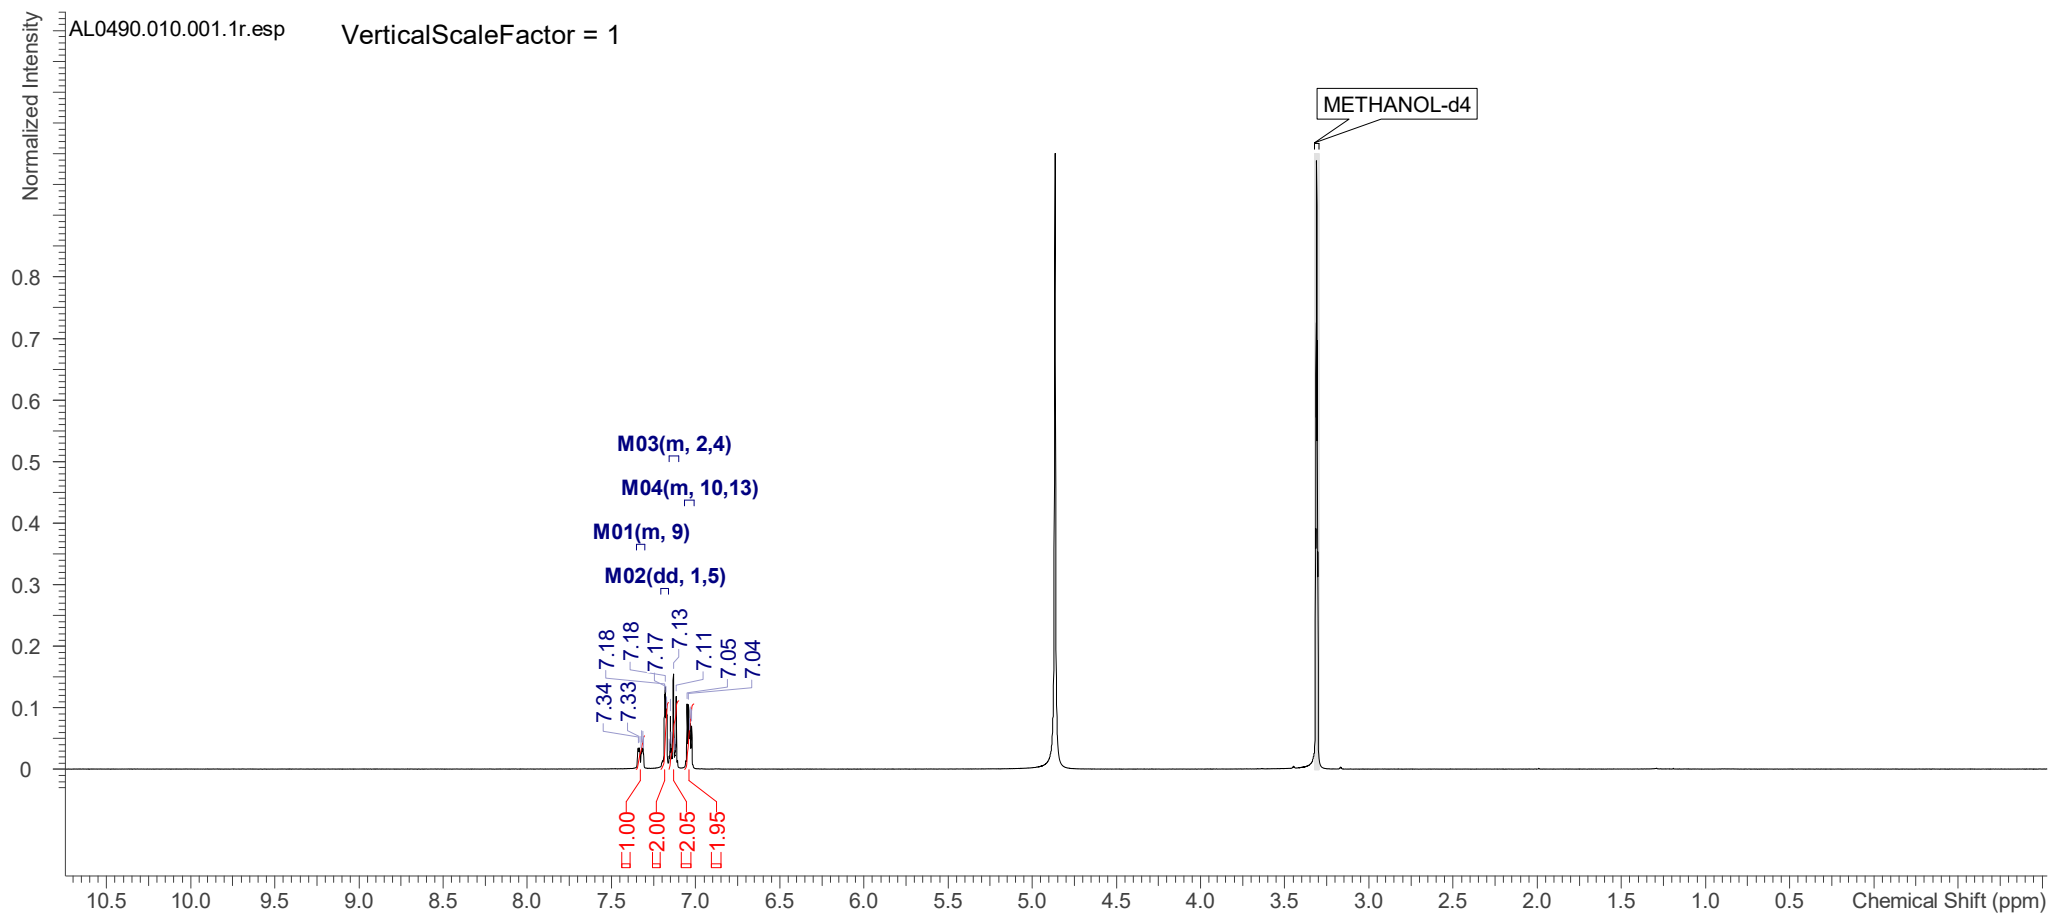

Compound 5f

4/2/2024 8:53:03 AM

|                         |                                        |                                      |
|-------------------------|----------------------------------------|--------------------------------------|
| <b>Number of Nuclei</b> | 12 C's / 12 C's (spectrum / structure) | <b>Multiplets Integrals Sum</b> 5.83 |
|-------------------------|----------------------------------------|--------------------------------------|

<sup>13</sup>C NMR (126 MHz, METHANOL-d<sub>4</sub>, ppm) δ= 113.7 (1 C, br d, J = 22.06 Hz), 117.7 (2 C, br d, J = 23.90 Hz), 120.9 (2 C, d, J = 8.27 Hz), 120.9 (1 C, br s), 123.1 (1 C, s), 128.5 – 128.7 (1 C, m), 146.4 (1 C, br d, J = 11.03 Hz), 154.0 (1 C, s), 155.3 (1 C, br d, J = 250.94 Hz), 160.8 (1 C, br d, J = 240.83 Hz)

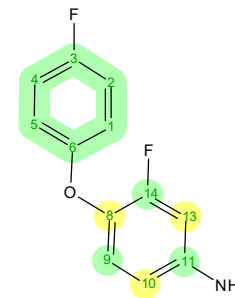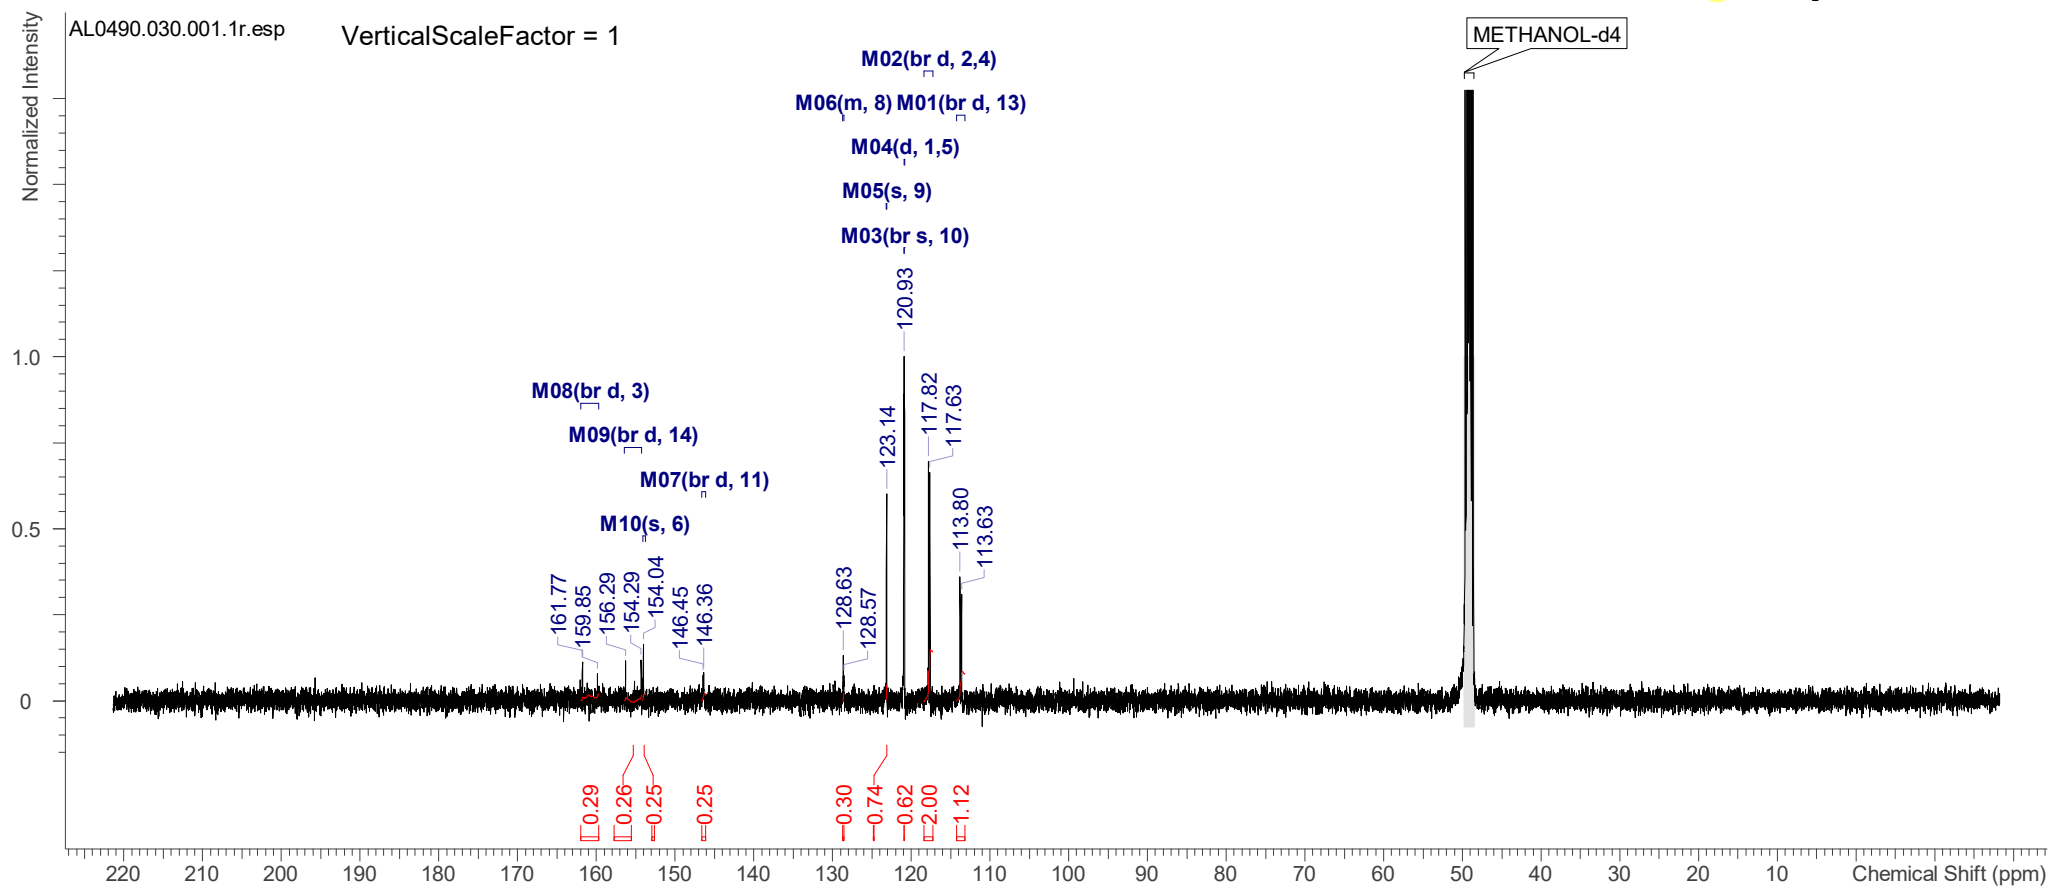

Compound 5f

4/2/2024 8:53:06 AM

|                  |                                      |                          |      |
|------------------|--------------------------------------|--------------------------|------|
| Number of Nuclei | 2 F's / 2 F's (spectrum / structure) | Multiplets Integrals Sum | 2.50 |
|------------------|--------------------------------------|--------------------------|------|

<sup>19</sup>F NMR (470 MHz, METHANOL-*d*<sub>4</sub>, ppm) δ= -129.8 – -129.3 (1 F, m), -121.5 – -121.1 (1 F, m)

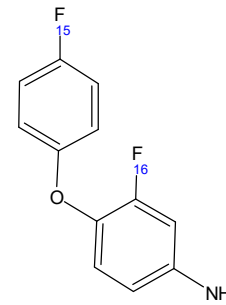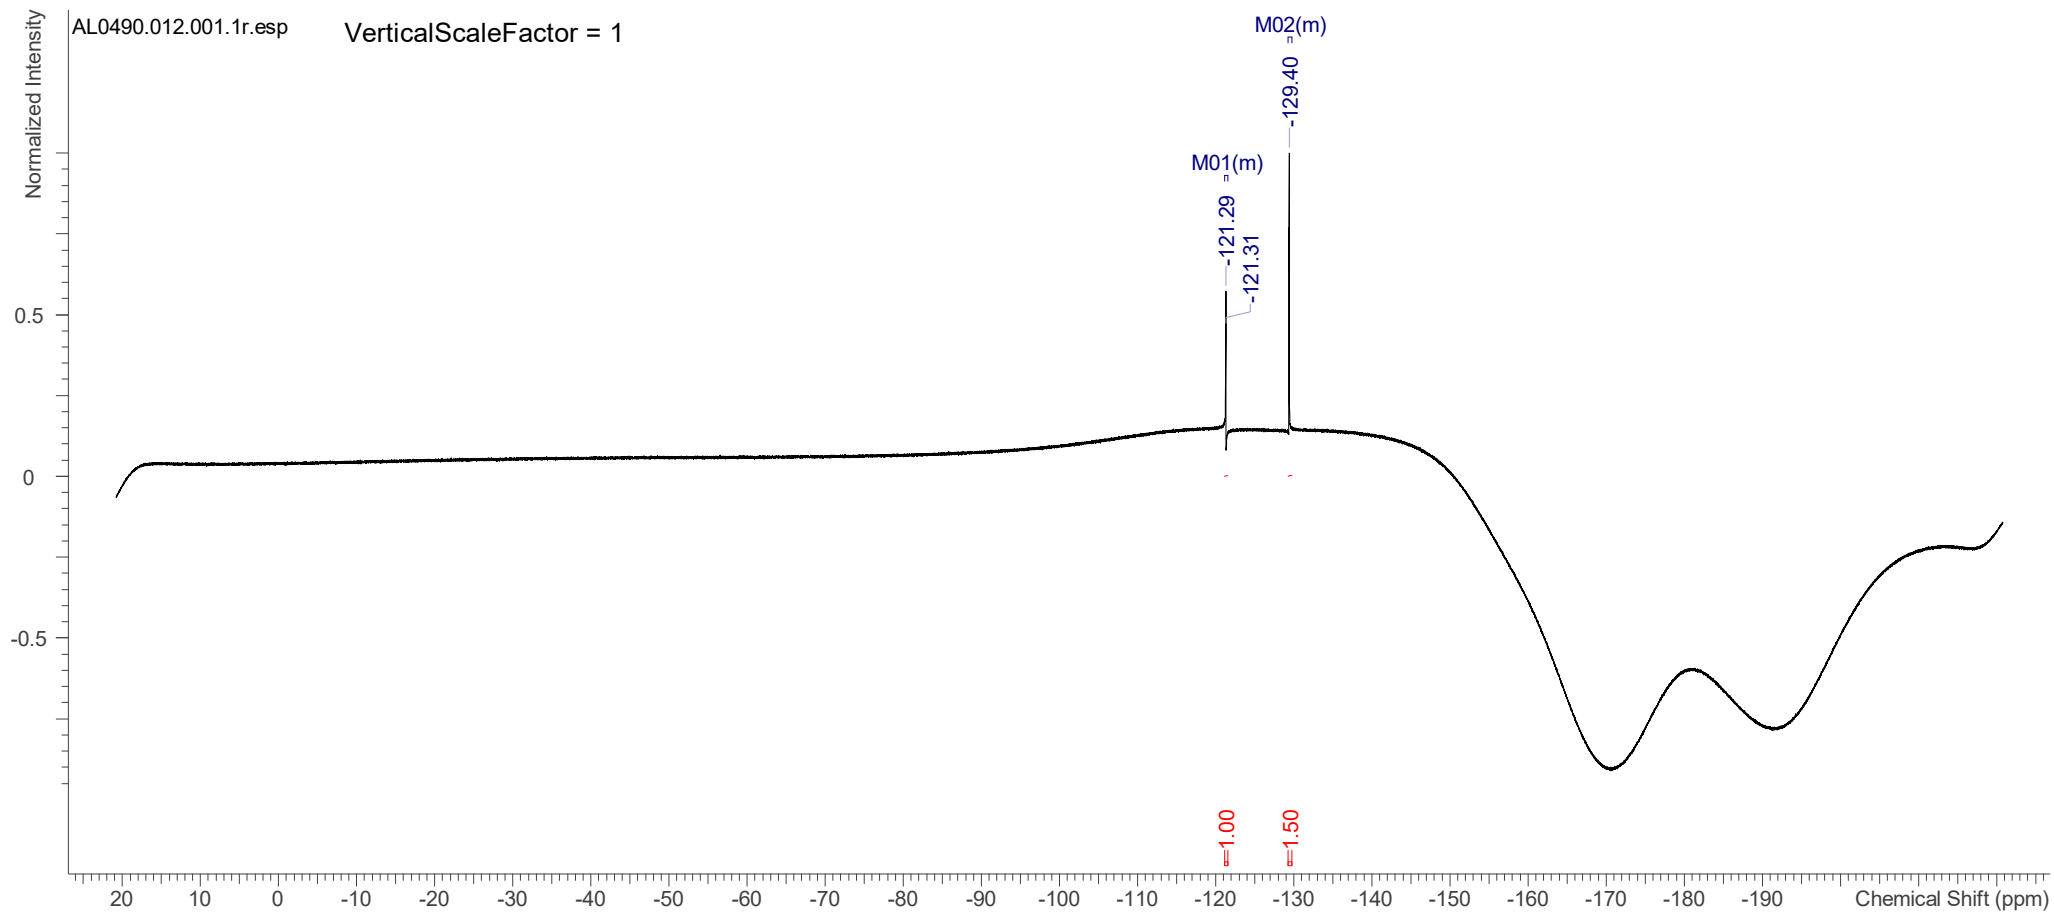

Compound 5g

4/2/2024 8:55:21 AM

|                         |                                      |                                      |
|-------------------------|--------------------------------------|--------------------------------------|
| <b>Number of Nuclei</b> | 7 H's / 9 H's (spectrum / structure) | <b>Multiplets Integrals Sum</b> 7.17 |
|-------------------------|--------------------------------------|--------------------------------------|

<sup>1</sup>H NMR (500 MHz, METHANOL-d<sub>4</sub>, ppm) δ= 7.40 – 7.35 (3 H, m), 7.29 – 7.22 (2 H, m), 7.02 – 6.98 (2 H, m);

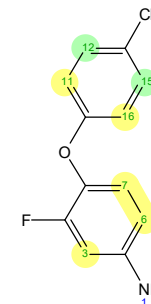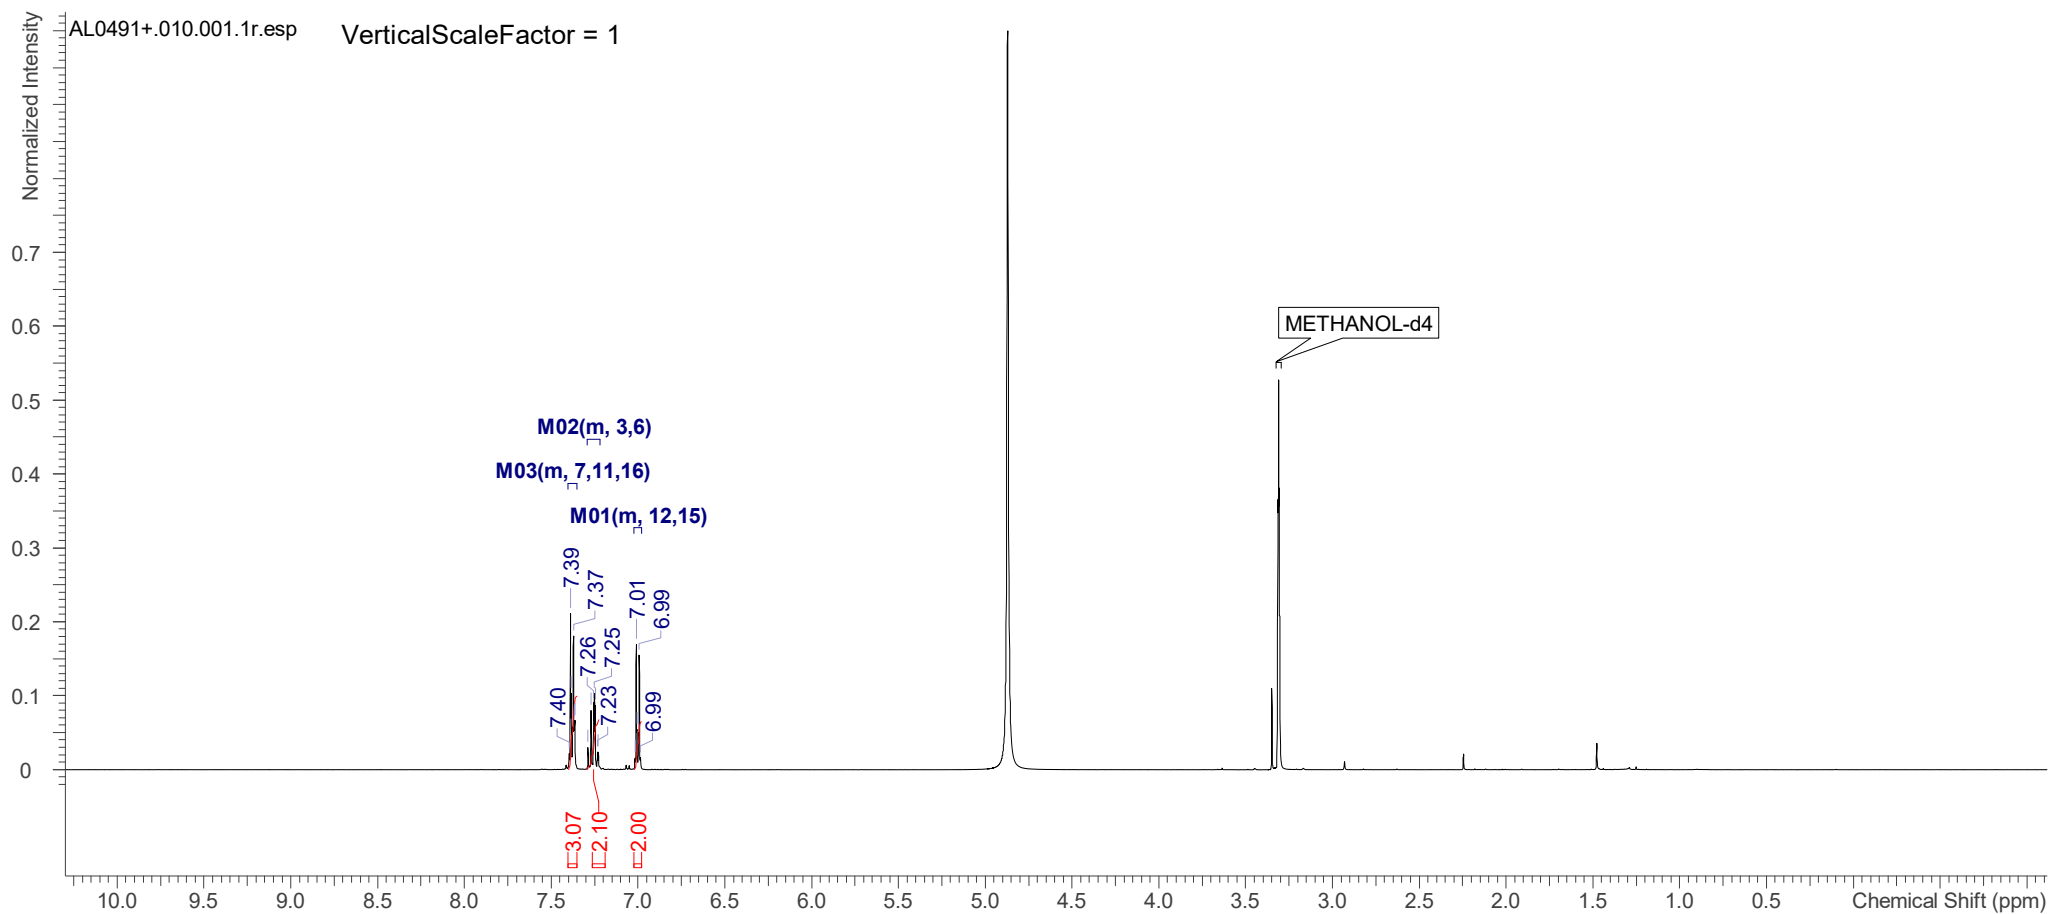

## Compound 5g

4/2/2024 8:55:24 AM

|                  |                                        |                               |
|------------------|----------------------------------------|-------------------------------|
| Number of Nuclei | 12 C's / 12 C's (spectrum / structure) | Multiplets Integrals Sum 4.44 |
|------------------|----------------------------------------|-------------------------------|

$^{13}\text{C}$  NMR (126 MHz, METHANOL- $d_4$ , ppm)  $\delta$ = 114.1 (1 C, d,  $J$  = 22.06 Hz), 120.4 (2 C, s), 121.3 (1 C, d,  $J$  = 3.68 Hz), 124.0 (1 C, d,  $J$  = 1.84 Hz), 128.6 (1 C, d,  $J$  = 8.27 Hz), 130.4 (1 C, s), 131.2 (2 C, s), 145.8 (1 C, d,  $J$  = 11.95 Hz), 155.5 (1 C, d,  $J$  = 251.86 Hz), 157.0 (1 C, s);

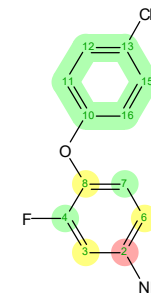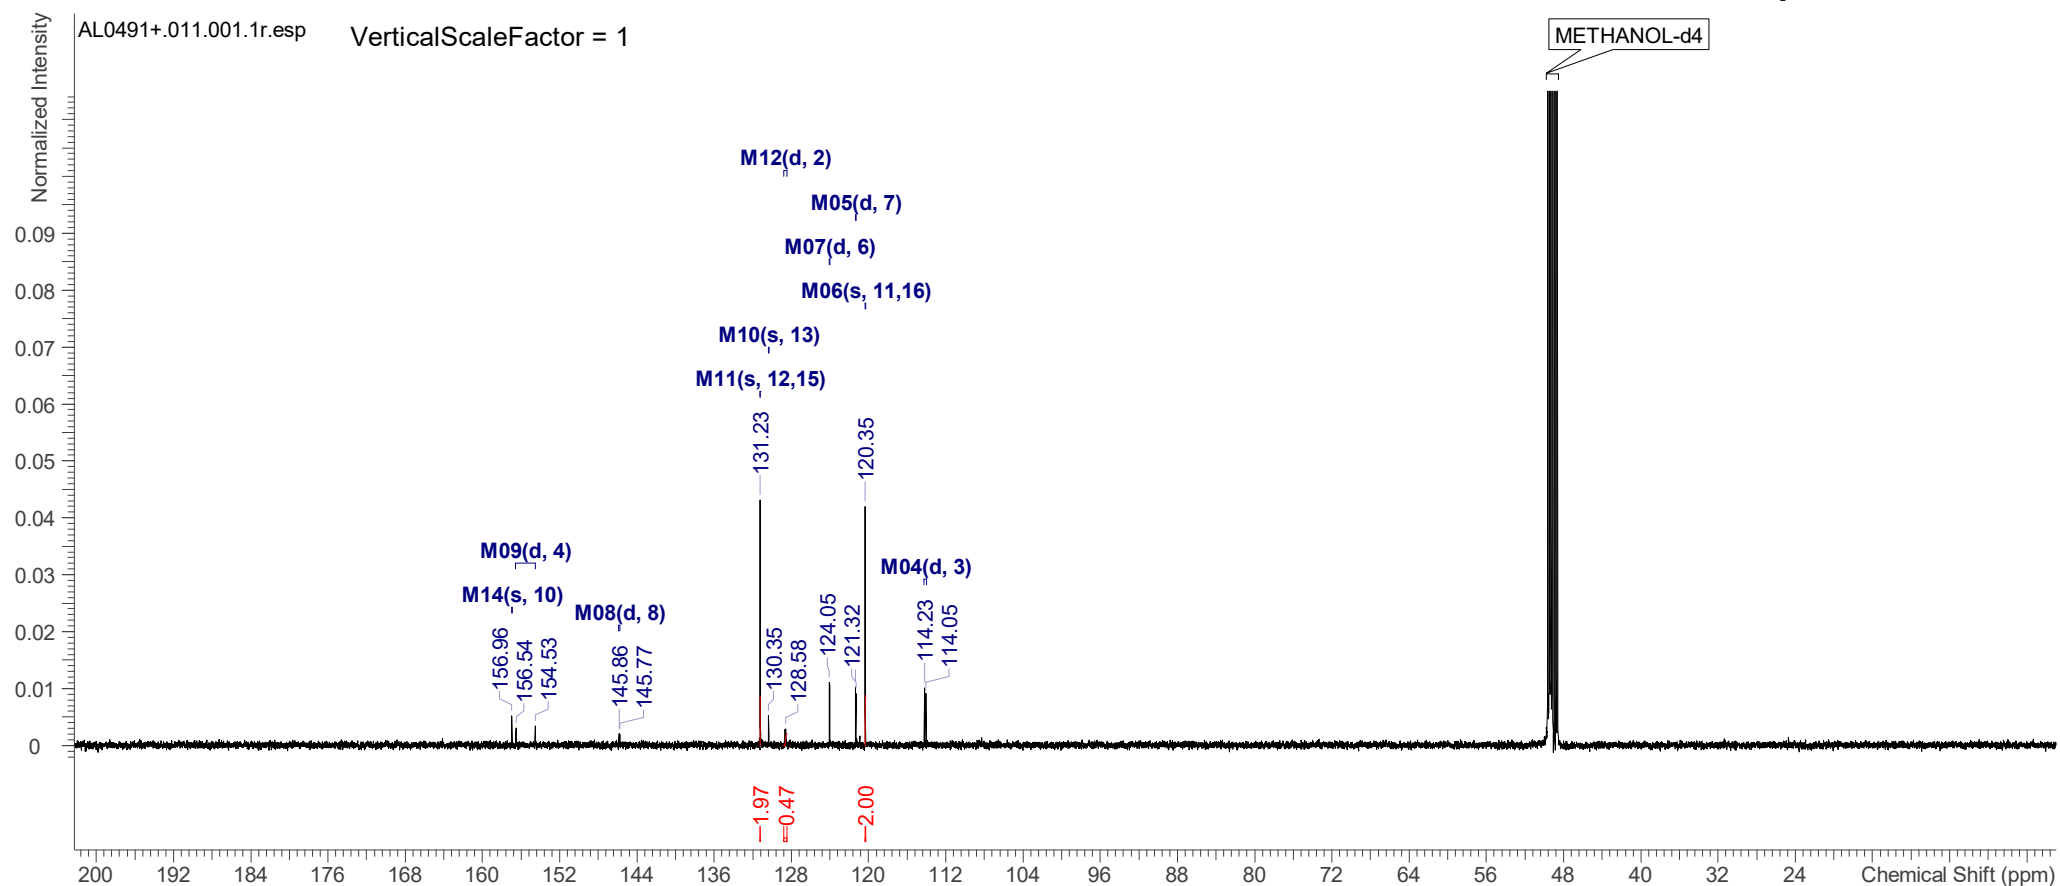

AL0491+.011.001.1r.esp

Compound 5g

4/2/2024 8:55:26 AM

|                         |                                      |                                      |
|-------------------------|--------------------------------------|--------------------------------------|
| <b>Number of Nuclei</b> | 1 F's / 1 F's (spectrum / structure) | <b>Multiplets Integrals Sum</b> 1.00 |
|-------------------------|--------------------------------------|--------------------------------------|

$^{19}\text{F}$  NMR (470 MHz, METHANOL- $d_4$ , ppm)  $\delta = -128.5$  (1 F, br dd,  $J = 10.41, 6.93$  Hz)

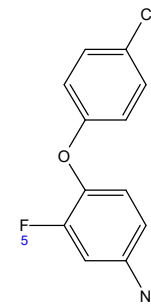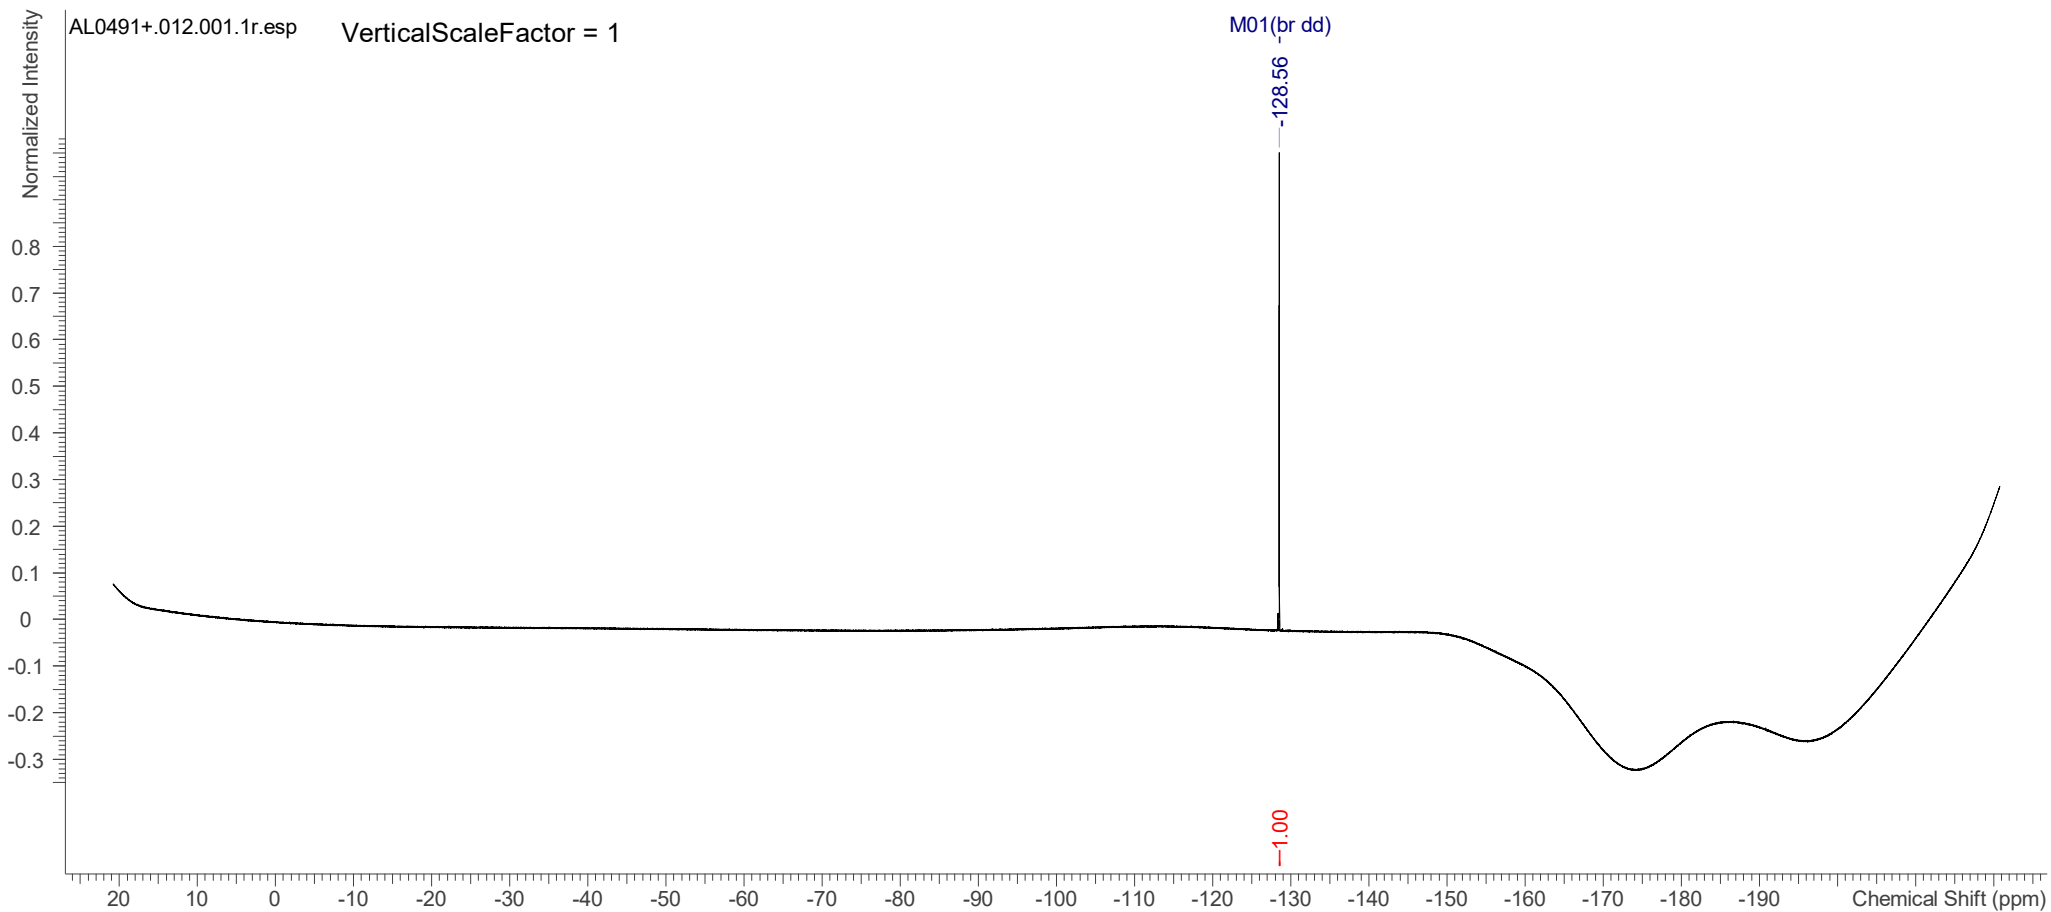

Compound 5h

4/2/2024 8:57:19 AM

|                  |                                      |                          |      |
|------------------|--------------------------------------|--------------------------|------|
| Number of Nuclei | 7 H's / 9 H's (spectrum / structure) | Multiplets Integrals Sum | 7.60 |
|------------------|--------------------------------------|--------------------------|------|

<sup>1</sup>H NMR (500 MHz, METHANOL-d<sub>4</sub>, ppm) δ= 7.58 (1 H, d, J = 2.59 Hz), 7.32 (1 H, dd, J = 8.77, 2.67 Hz), 7.19 – 7.13 (2 H, m), 7.08 (1 H, d, J = 8.85 Hz), 7.06 – 7.00 (2 H, m);

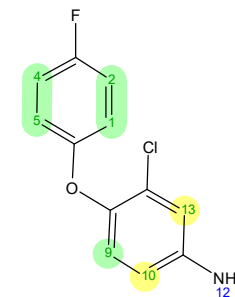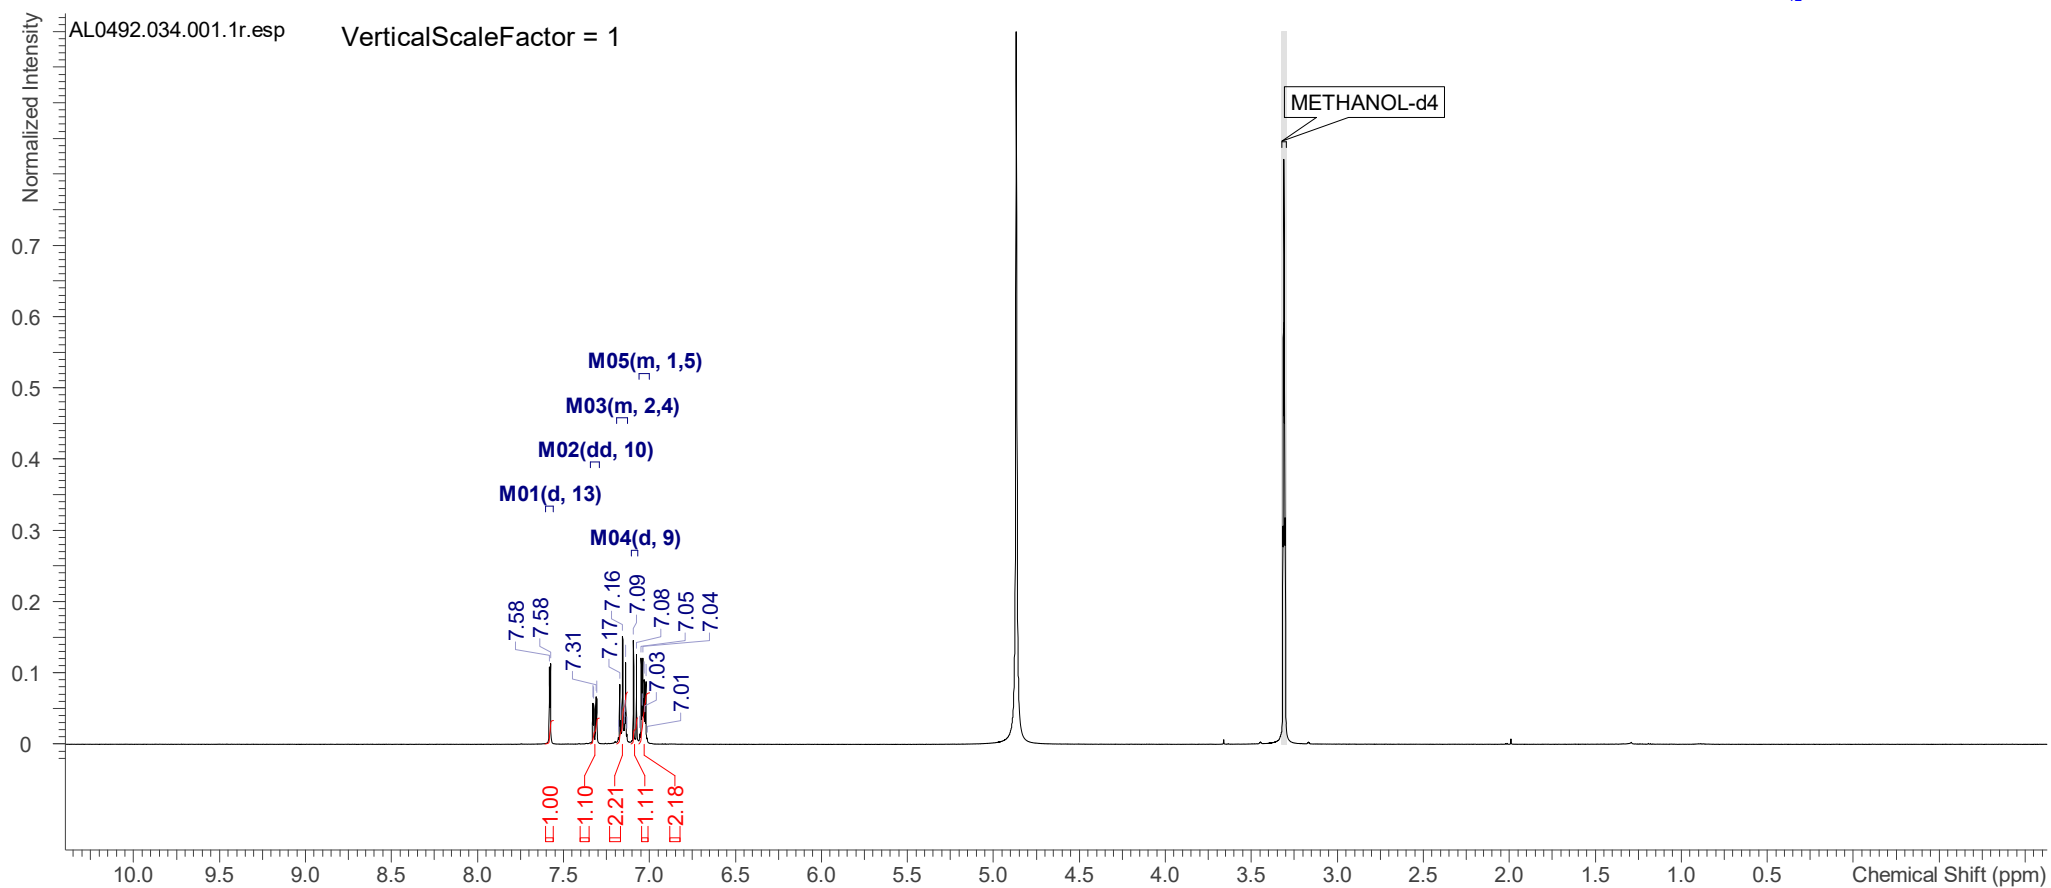

Compound 5h

4/2/2024 8:57:21 AM

|                  |                                        |                          |      |
|------------------|----------------------------------------|--------------------------|------|
| Number of Nuclei | 12 C's / 12 C's (spectrum / structure) | Multiplets Integrals Sum | 8.62 |
|------------------|----------------------------------------|--------------------------|------|

$^{13}\text{C}$  NMR (126 MHz, METHANOL- $d_4$ , ppm)  $\delta$  = 117.9 (2 C, d,  $J$  = 23.90 Hz), 121.6 (1 C, s), 121.7 (2 C, d,  $J$  = 1.84 Hz), 124.5 (1 C, s), 126.9 (1 C, s), 127.4 (1 C, s), 127.9 (1 C, s), 153.5 (1 C, s), 155.3 (1 C, s), 161.0 (1 C, d,  $J$  = 241.75 Hz);

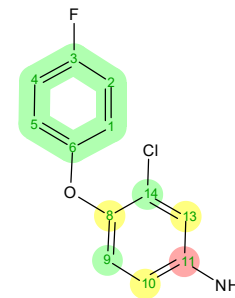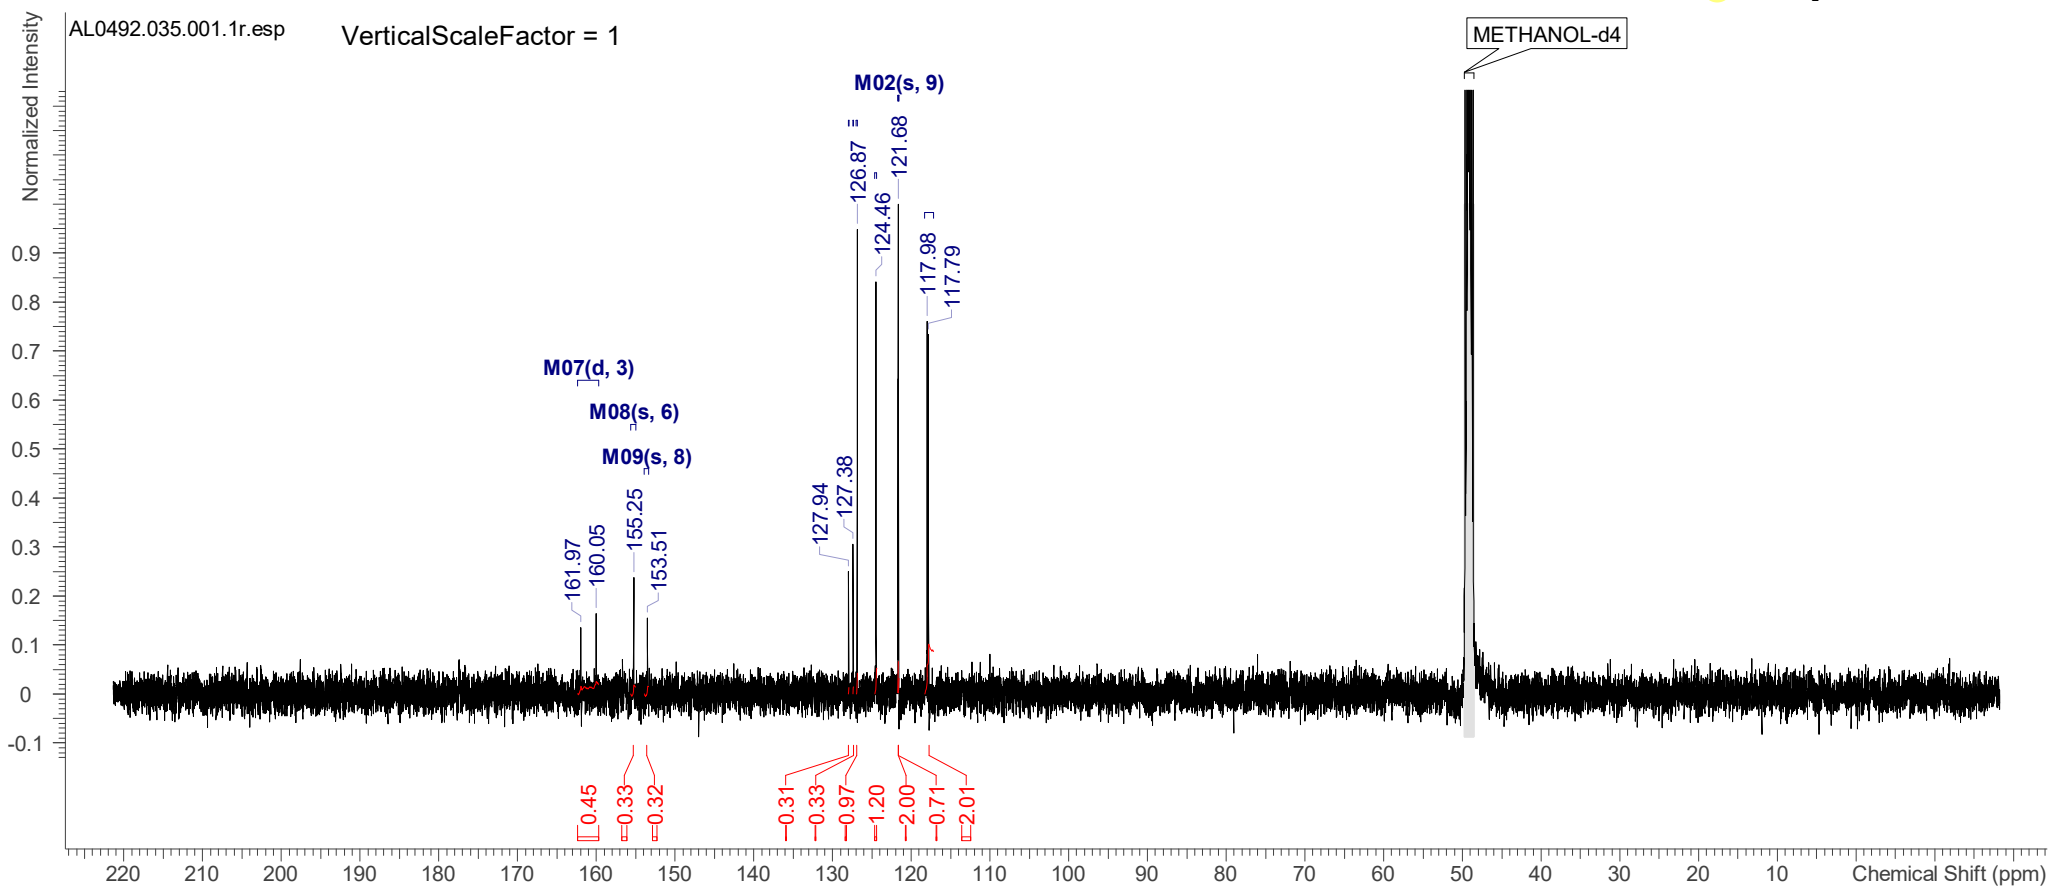

Compound 5h

4/2/2024 8:57:33 AM

|                  |                                      |                          |      |
|------------------|--------------------------------------|--------------------------|------|
| Number of Nuclei | 1 F's / 1 F's (spectrum / structure) | Multiplets Integrals Sum | 1.00 |
|------------------|--------------------------------------|--------------------------|------|

$^{19}\text{F}$  NMR (470 MHz, METHANOL- $d_4$ , ppm)  $\delta = -120.8 - -120.7$  (1 F, m)

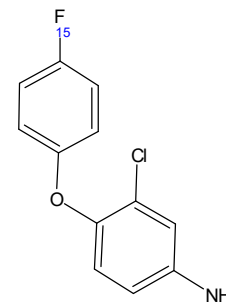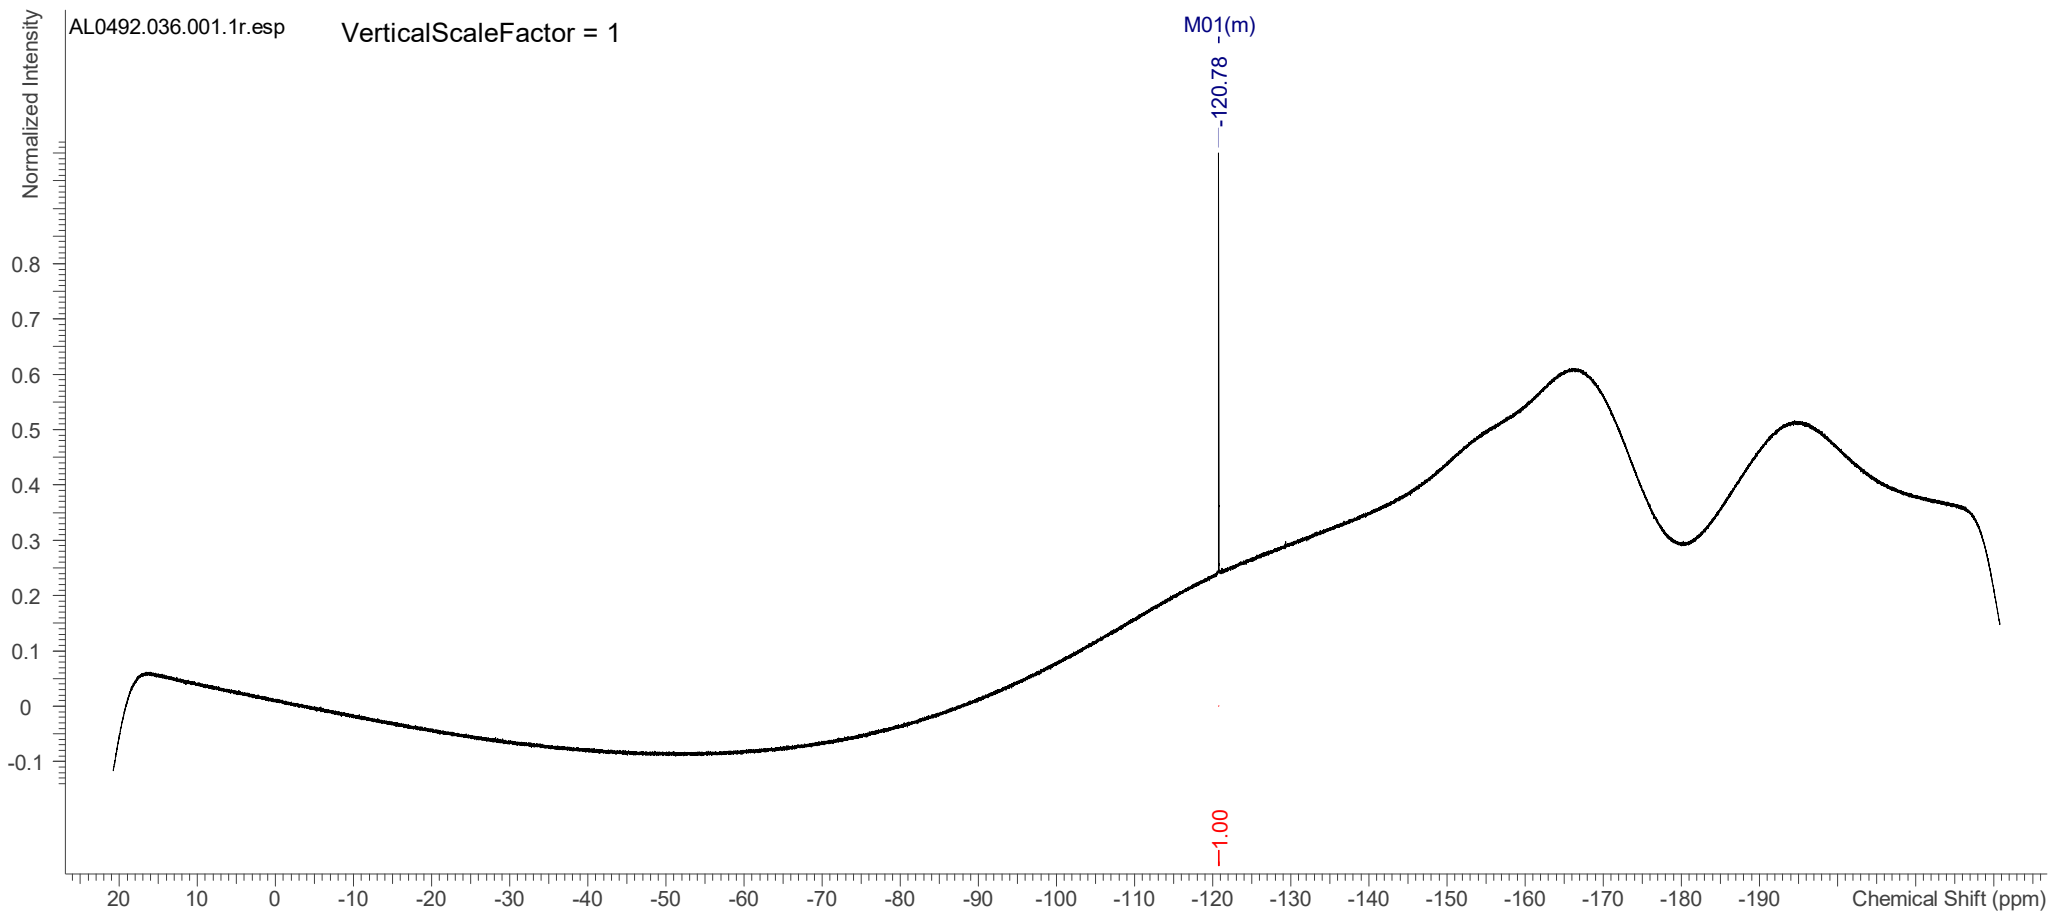

Compound 5i

7/10/2023 9:32:04 AM

|                         |                                      |                                 |      |
|-------------------------|--------------------------------------|---------------------------------|------|
| <b>Number of Nuclei</b> | 7 H's / 9 H's (spectrum / structure) | <b>Multiplets Integrals Sum</b> | 7.25 |
|-------------------------|--------------------------------------|---------------------------------|------|

<sup>1</sup>H NMR (500 MHz, METHANOL-d<sub>4</sub>, ppm) δ= 7.56 – 7.50 (3 H, m), 7.29 (1 H, dd, J = 8.77, 2.67 Hz), 7.16 (1 H, d, J = 8.70 Hz), 6.93 – 6.88 (2 H, m);

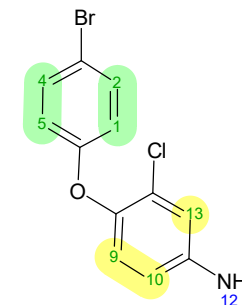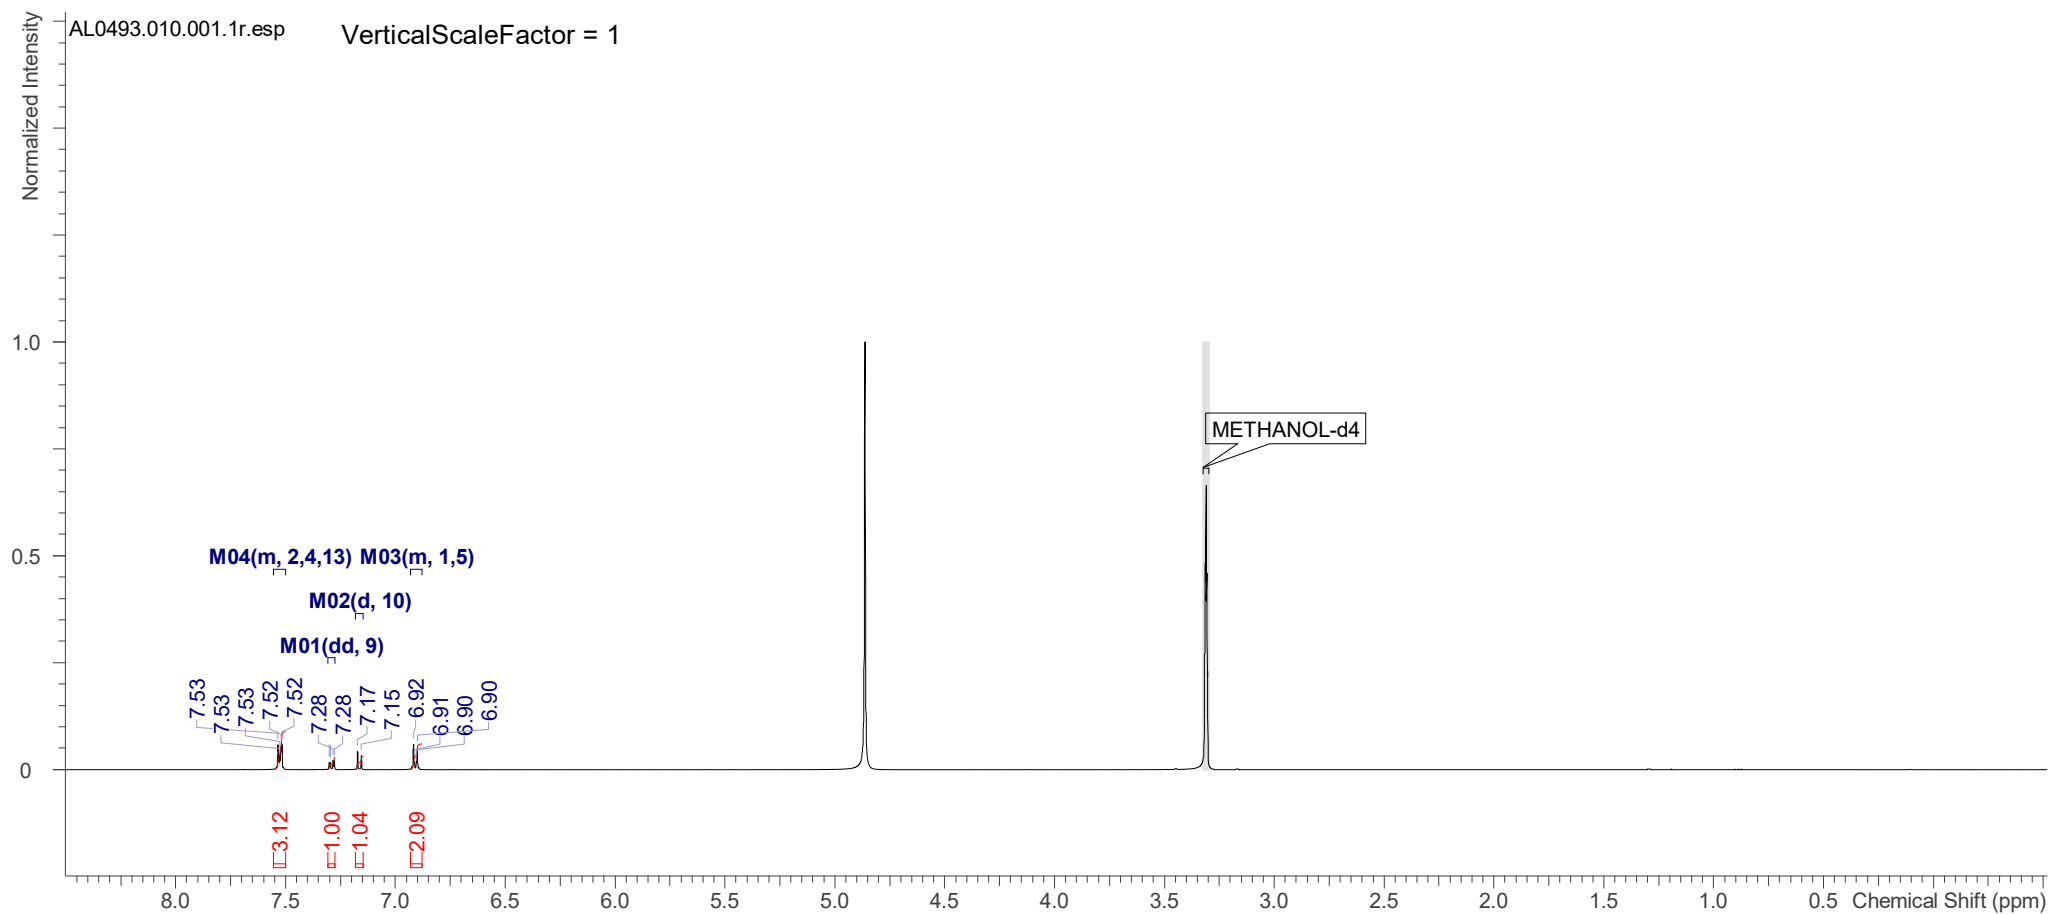

Compound 5i

7/10/2023 9:32:08 AM

|                  |                                        |                               |
|------------------|----------------------------------------|-------------------------------|
| Number of Nuclei | 12 C's / 12 C's (spectrum / structure) | Multiplets Integrals Sum 7.88 |
|------------------|----------------------------------------|-------------------------------|

<sup>13</sup>C NMR (126 MHz, METHANOL-d<sub>4</sub>, ppm) δ= 157.3 (1 C, s), 155.8 (1 C, s), 153.3 (1 C, s), 134.3 (2 C, s), 128.2 (1 C, s), 126.2 (1 C, s), 123.9 (1 C, s), 123.1 (1 C, s), 121.1 (2 C, s), 117.6 (1 C, s)

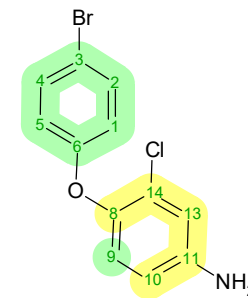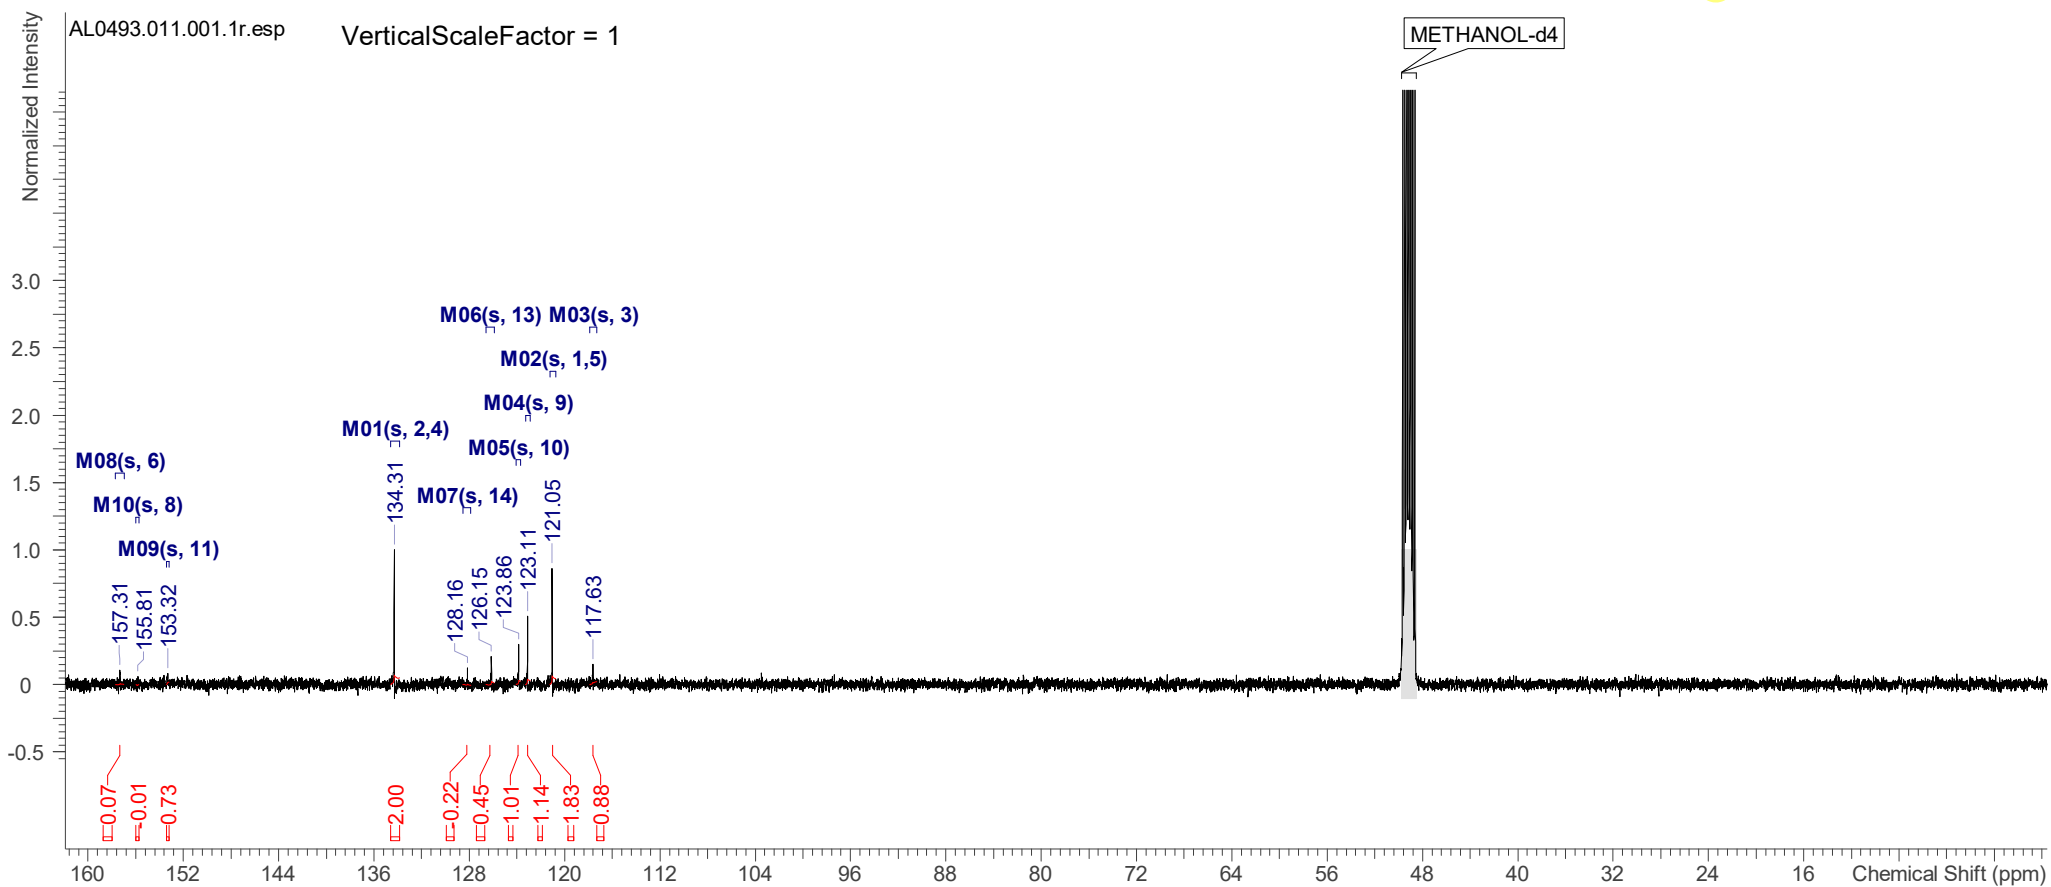

Compound 5j

7/10/2023 9:34:40 AM

|                  |                                      |                          |      |
|------------------|--------------------------------------|--------------------------|------|
| Number of Nuclei | 7 H's / 9 H's (spectrum / structure) | Multiplets Integrals Sum | 7.93 |
|------------------|--------------------------------------|--------------------------|------|

<sup>1</sup>H NMR (500 MHz, METHANOL-d<sub>4</sub>, ppm) δ= 7.70 (2 H, d, J = 8.85 Hz), 7.51 (1 H, d, J = 2.59 Hz), 7.28 (1 H, dd, J = 8.77, 2.52 Hz), 7.16 (1 H, d, J = 8.70 Hz), 6.81 – 6.75 (2 H, m);

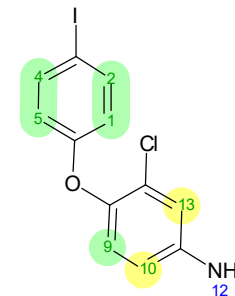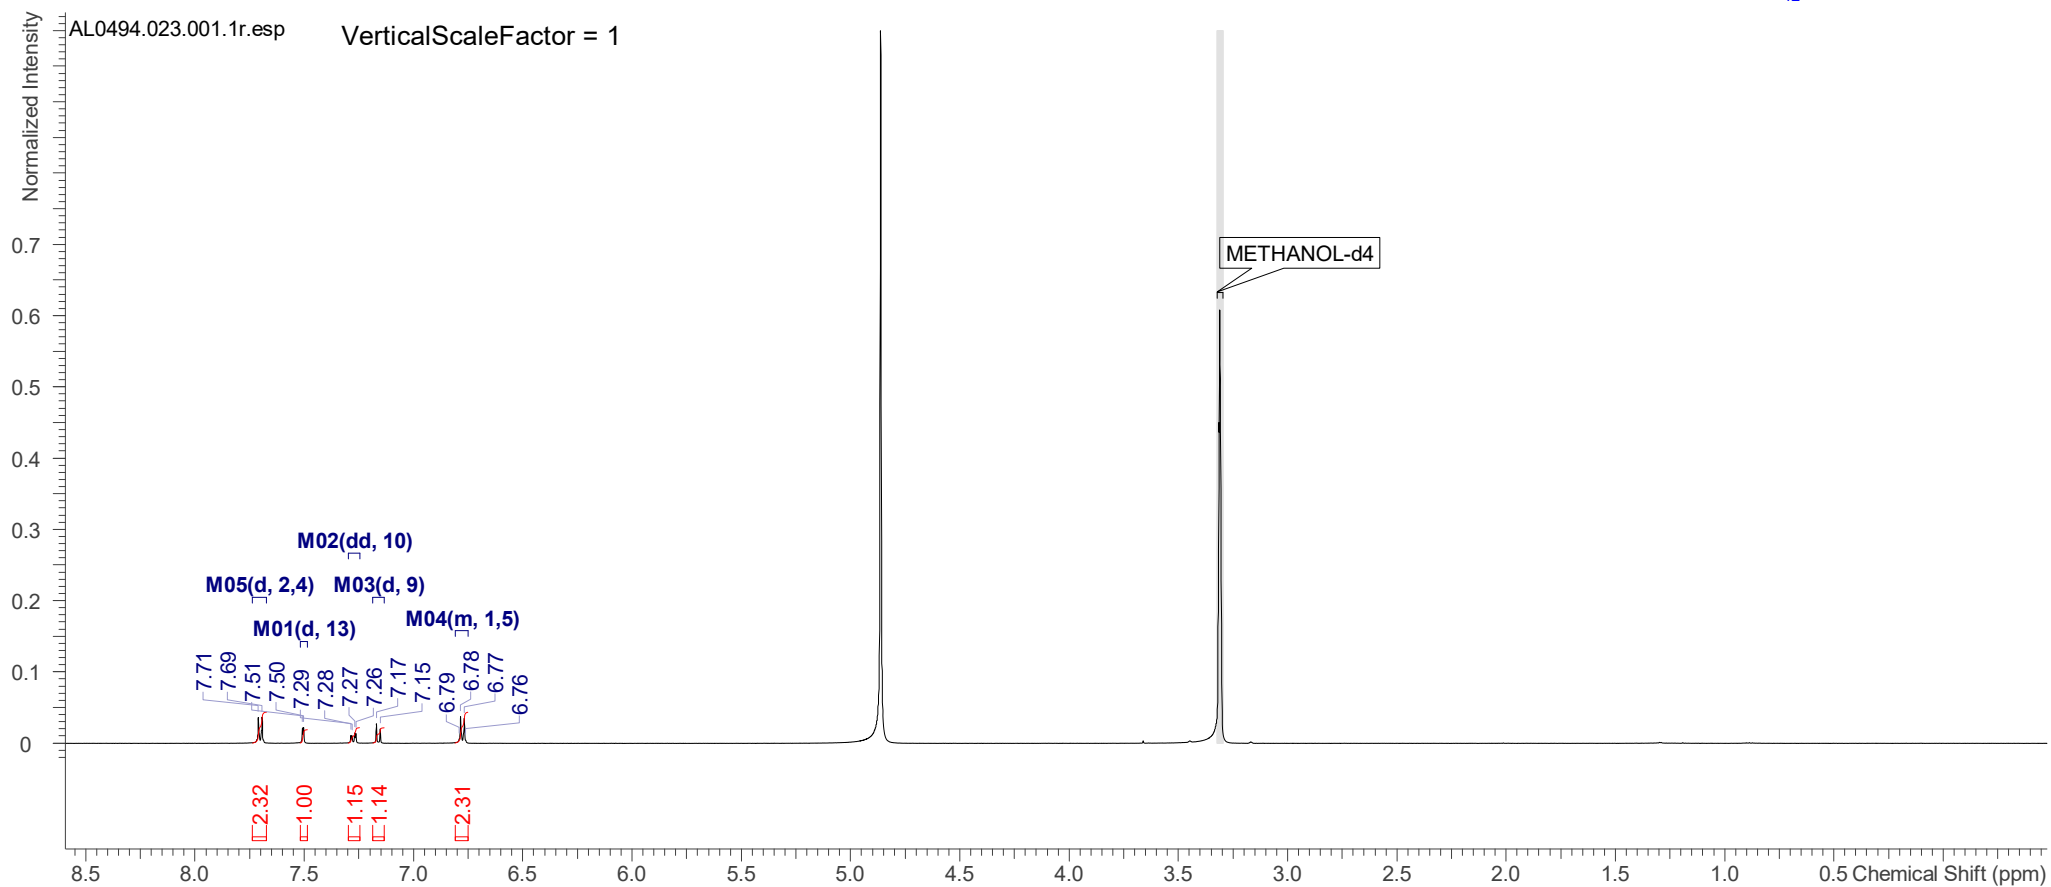

Compound 5j

7/10/2023 9:34:45 AM

|                         |                                        |                                       |
|-------------------------|----------------------------------------|---------------------------------------|
| <b>Number of Nuclei</b> | 12 C's / 12 C's (spectrum / structure) | <b>Multiplets Integrals Sum</b> 11.55 |
|-------------------------|----------------------------------------|---------------------------------------|

<sup>13</sup>C NMR (126 MHz, METHANOL-d<sub>4</sub>, ppm) δ= 158.2 (1 C, s), 156.1 (1 C, s), 153.0 (1 C, s), 140.4 (2 C, s), 128.2 (1 C, s), 126.0 (1 C, s), 123.7 (1 C, s), 123.3 (1 C, s), 121.3 (2 C, s), 87.7 (1 C, s)

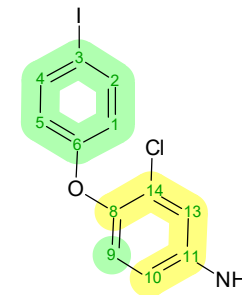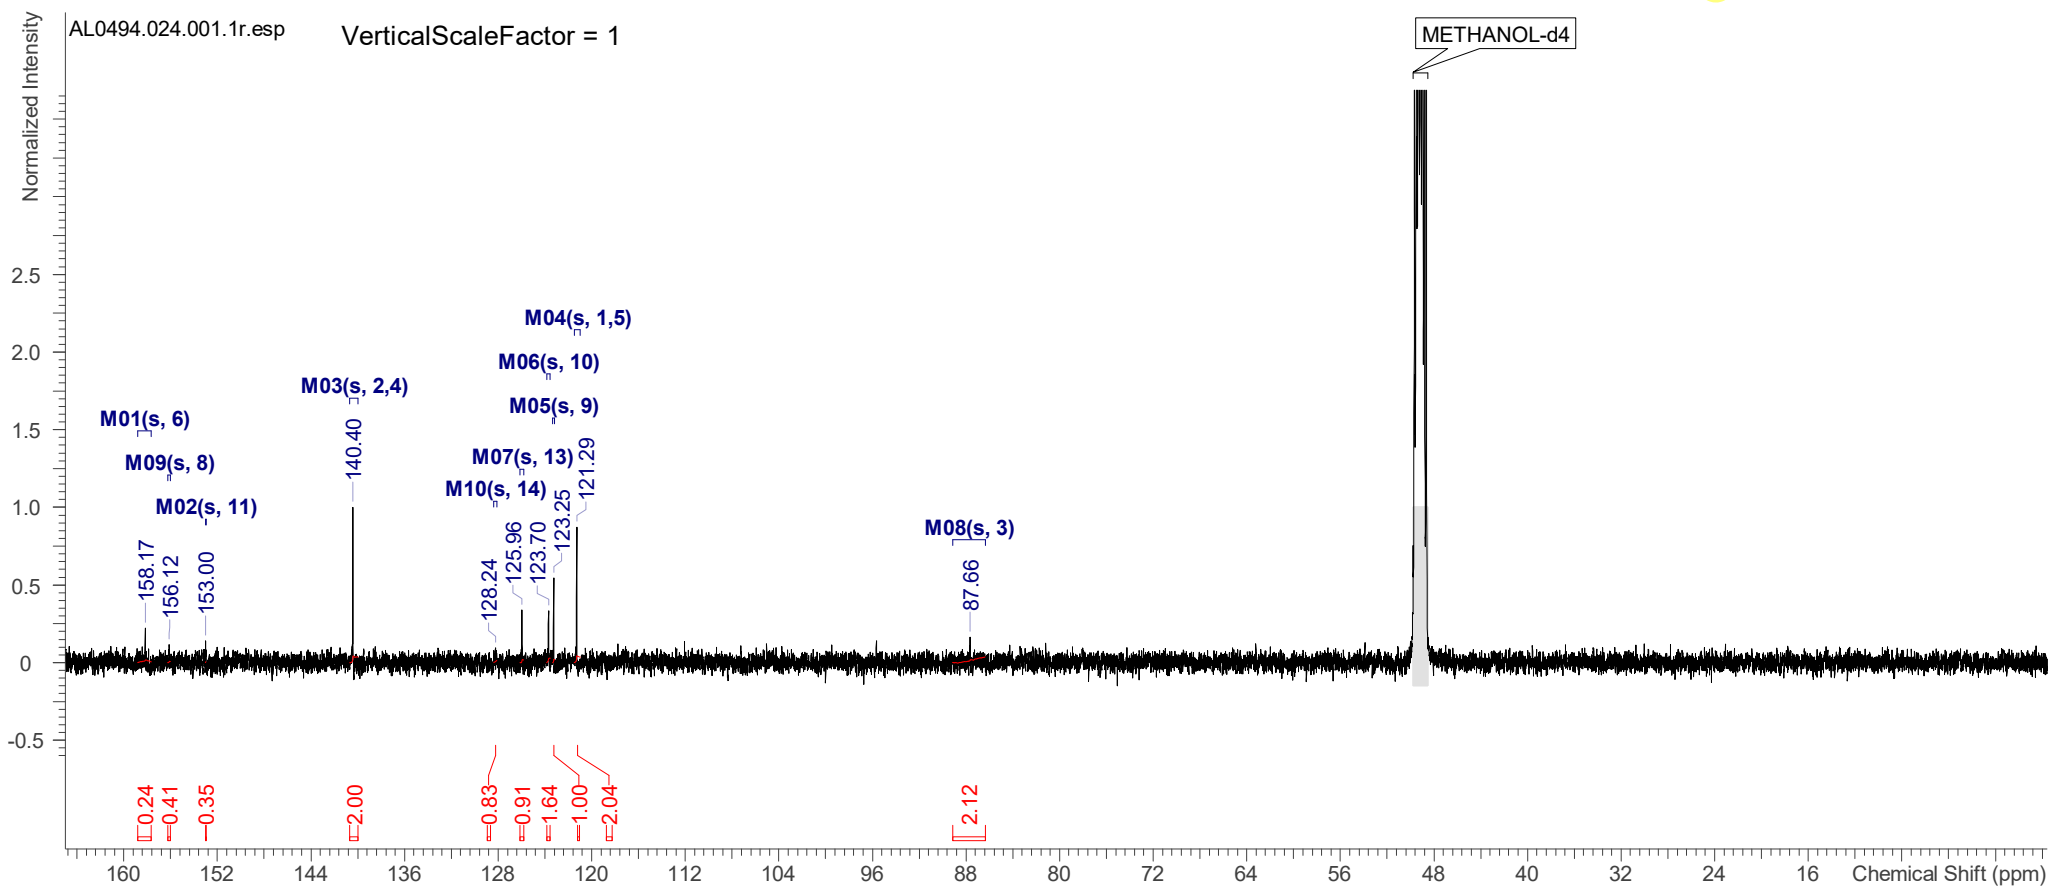

Compound 6a

11/29/2022 11:02:57 AM

|                         |                                        |                                       |
|-------------------------|----------------------------------------|---------------------------------------|
| <b>Number of Nuclei</b> | 26 H's / 26 H's (spectrum / structure) | <b>Multiplets Integrals Sum</b> 25.86 |
|-------------------------|----------------------------------------|---------------------------------------|

<sup>1</sup>H NMR (500 MHz, CHLOROFORM-*d*, ppm) δ= 7.79 (1 H, d, J = 2.44 Hz), 7.70 (1 H, s), 7.41 (1 H, dd, J = 8.85, 2.44 Hz), 7.30 – 7.27 (2 H, m), 6.99 (1 H, d, J = 8.85 Hz), 6.87 (2 H, d, J = 8.20 Hz), 4.21 (2 H, m), 2.81 (2 H, br s), 2.44 (1 H, s), 1.91 (2 H, m), 1.77 (2 H, m), 1.50 (9 H, s);

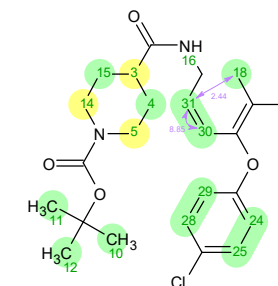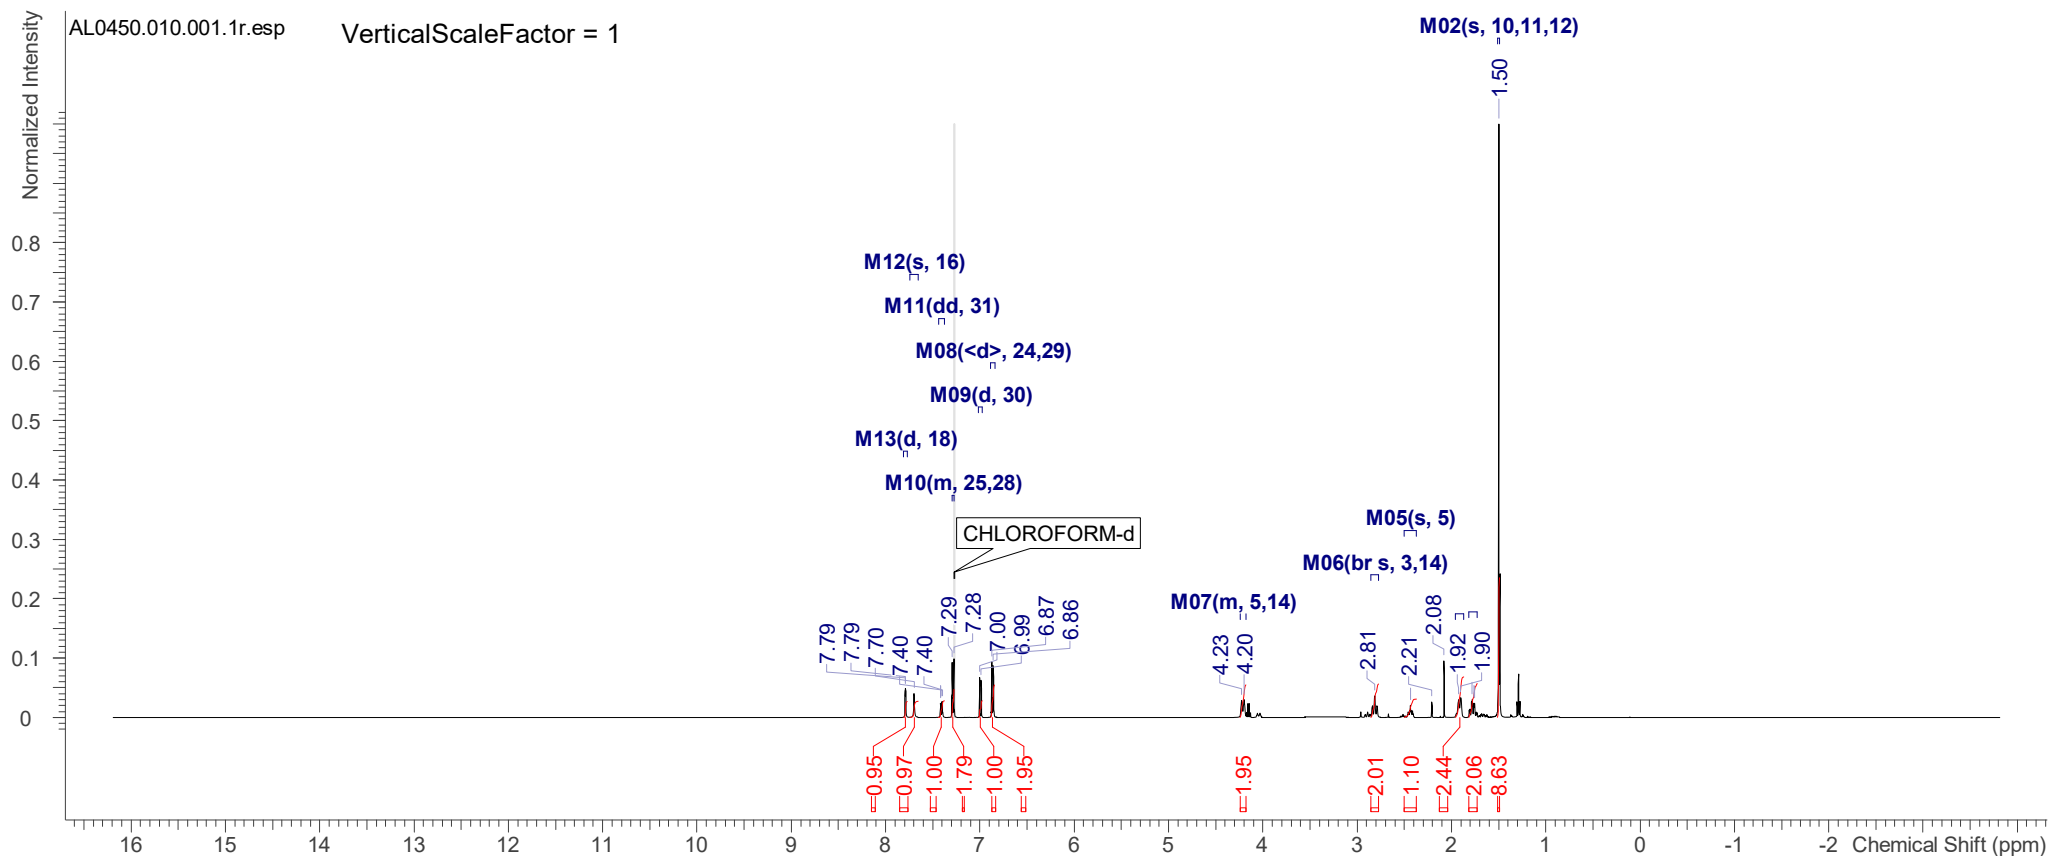

Compound 6a

11/29/2022 11:03:02 AM

|                         |                                        |                                      |
|-------------------------|----------------------------------------|--------------------------------------|
| <b>Number of Nuclei</b> | 23 C's / 23 C's (spectrum / structure) | <b>Multiplets Integrals Sum</b> 0.00 |
|-------------------------|----------------------------------------|--------------------------------------|

<sup>13</sup>C NMR (126 MHz, CHLOROFORM-d, ppm) δ= 172.9 (1 C, s), 155.9 (1 C, s), 154.7 (1 C, s), 148.0 (1 C, s), 135.0 (1 C, s), 129.7 (2 C, s), 128.0 (1 C, s), 126.5 (1 C, s), 122.3 (1 C, s), 121.7 (1 C, s), 119.6 (1 C, s), 118.4 (2 C, s), 79.9 (1 C, s), 44.1 (2 C, s), 43.1 (1 C, s), 28.5 (2 C, s), 28.4 (3 C, s)

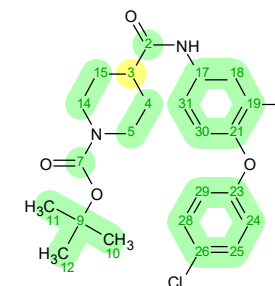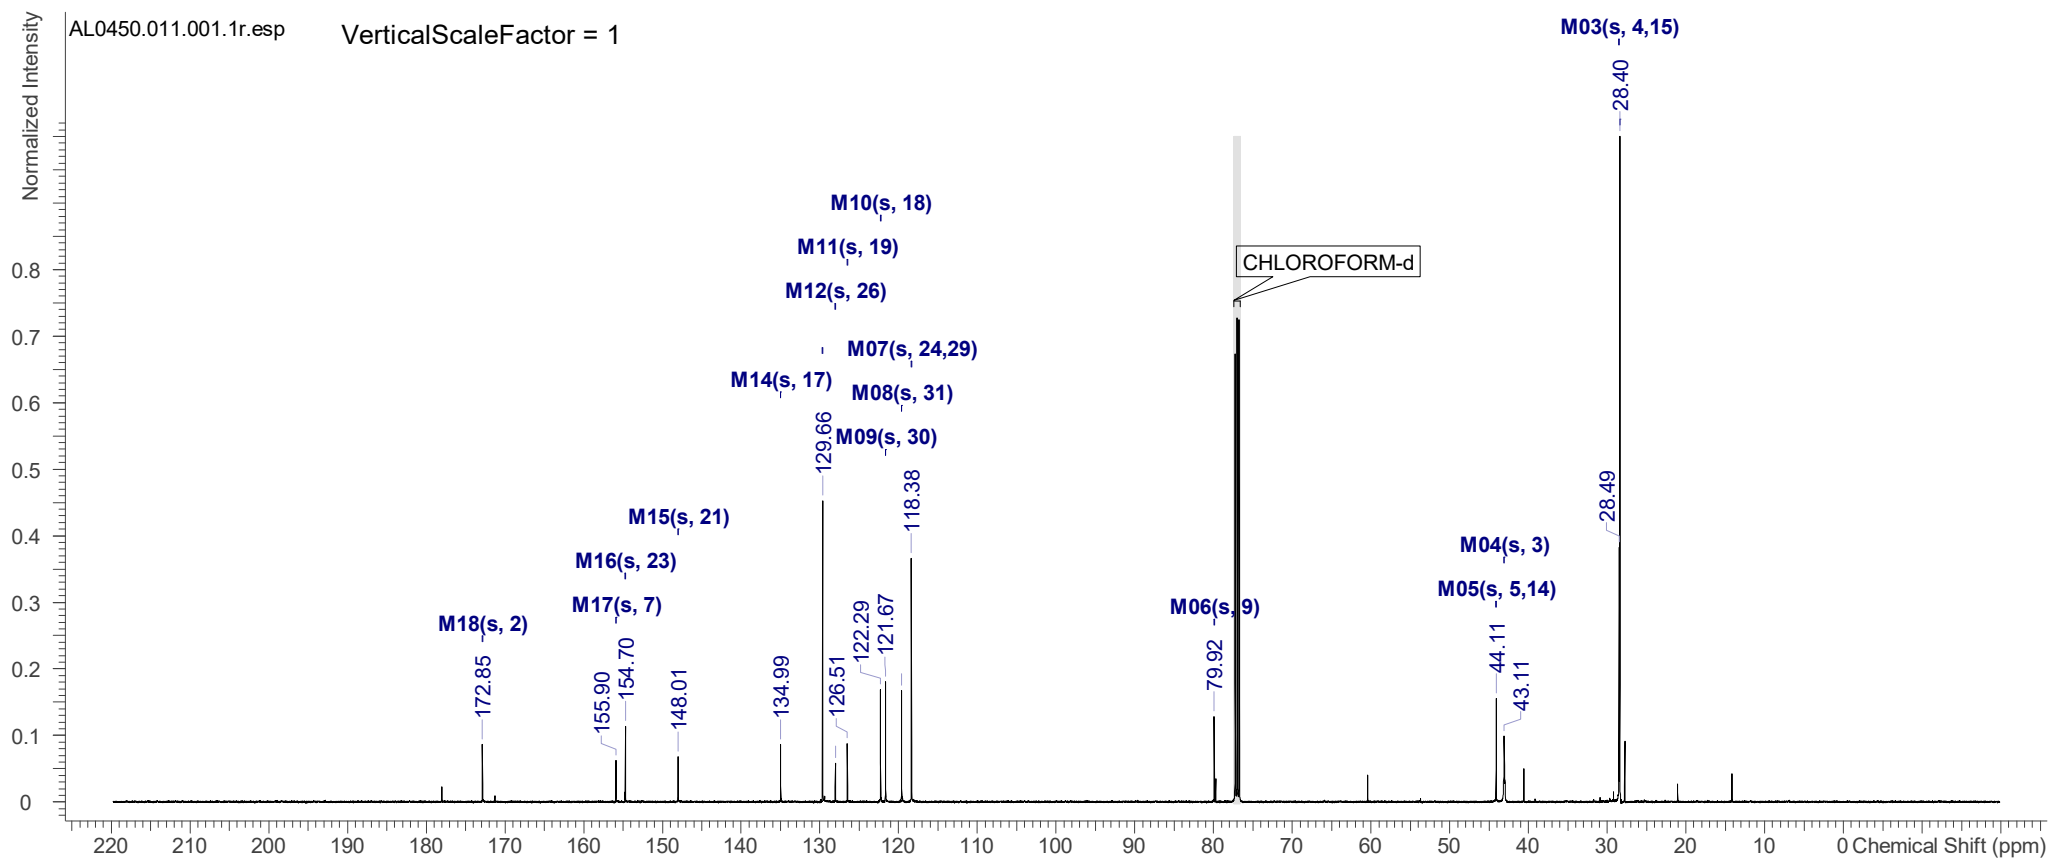

|                  |                                        |                          |       |
|------------------|----------------------------------------|--------------------------|-------|
| Number of Nuclei | 27 H's / 27 H's (spectrum / structure) | Multiplets Integrals Sum | 27.95 |
|------------------|----------------------------------------|--------------------------|-------|

$^1\text{H}$  NMR (500 MHz, CHLOROFORM-*d*, ppm)  $\delta$ = 7.76 (1 H, d,  $J$  = 2.44 Hz), 7.51 (1 H, s), 7.38 – 7.29 (3 H, m), 7.09 (1 H, t,  $J$  = 7.40 Hz), 6.97 (1 H, d,  $J$  = 8.85 Hz), 6.92 (2 H, d,  $J$  = 7.93 Hz), 4.19 (2 H, m), 2.79 (2 H, m), 2.40 (1 H, m), 1.95 – 1.87 (2 H, m), 1.81 – 1.70 (2 H, m), 1.48 (9 H, s);

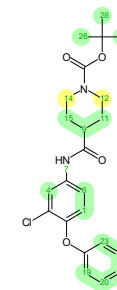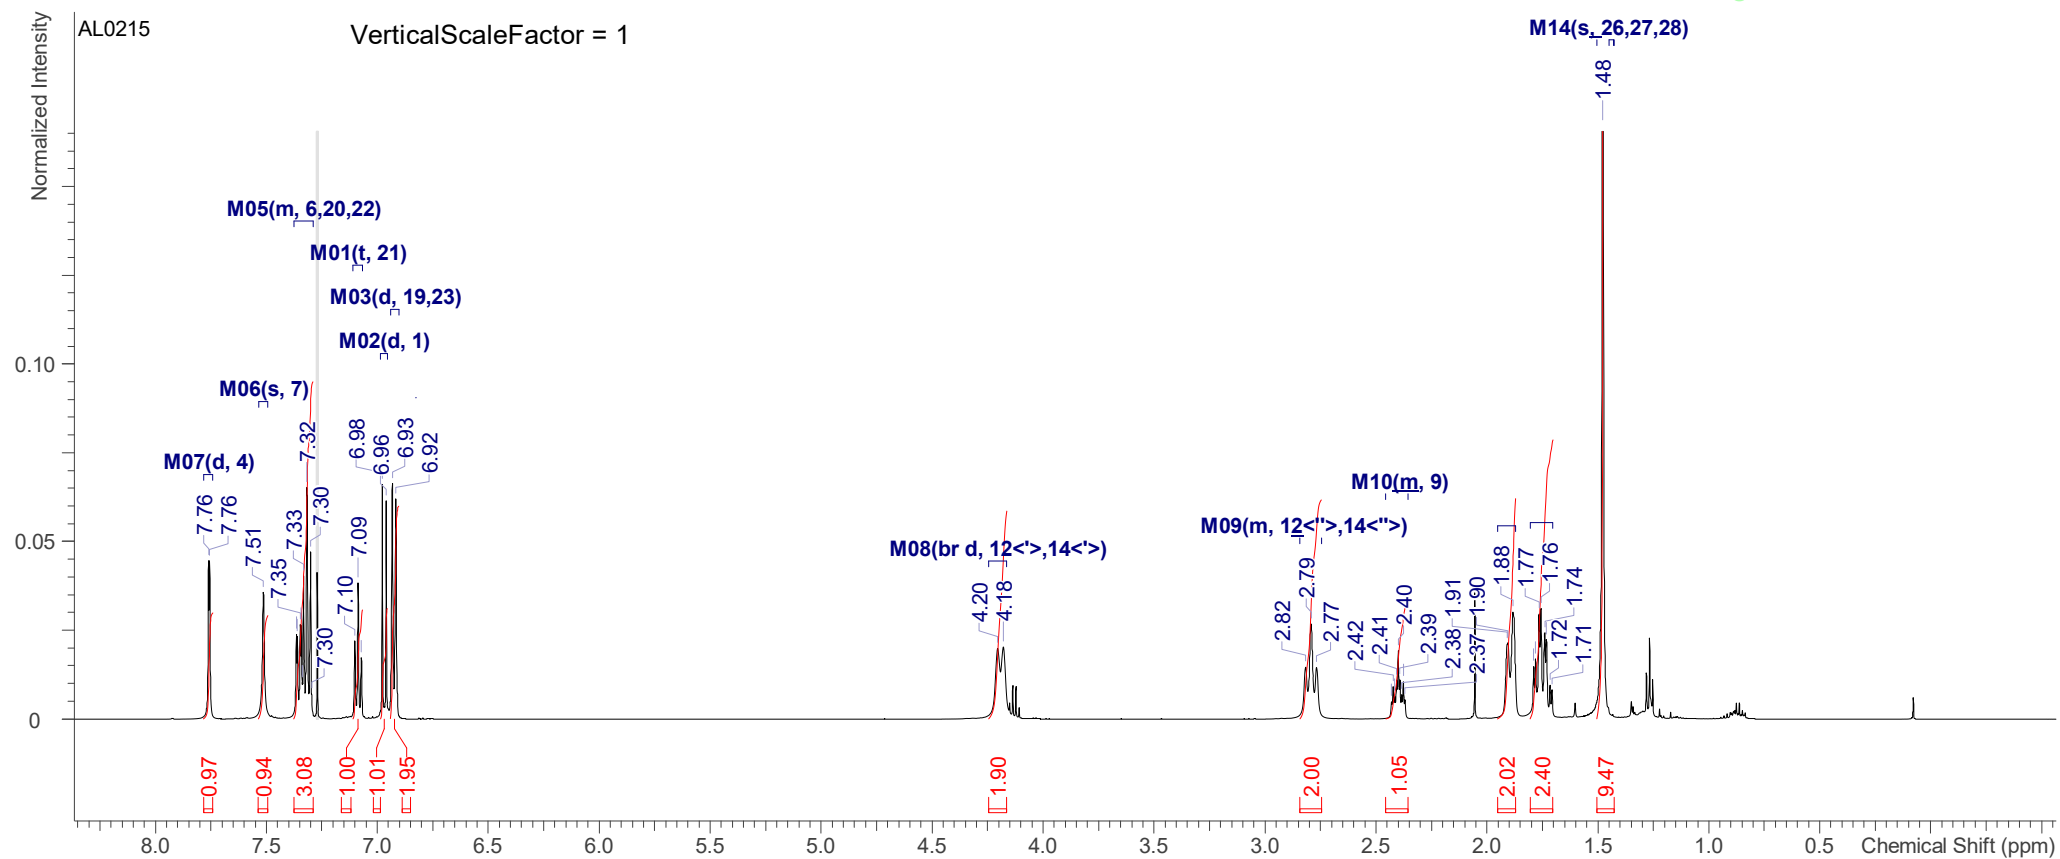

## Compound 6b

1/21/2022 10:12:56 AM

|                  |                                        |                          |       |
|------------------|----------------------------------------|--------------------------|-------|
| Number of Nuclei | 23 C's / 23 C's (spectrum / structure) | Multiplets Integrals Sum | 19.48 |
|------------------|----------------------------------------|--------------------------|-------|

$^{13}\text{C}$  NMR (126 MHz, CHLOROFORM-*d*, ppm)  $\delta$  = 172.72 (1 C, s), 157.19 (1 C, s), 154.68 (1 C, s), 148.58 (1 C, s), 134.48 (1 C, s), 129.72 (2 C, s), 126.36 (1 C, s), 123.13 (1 C, s), 122.25 (1 C, s), 121.45 (1 C, s), 119.56 (1 C, s), 117.36 (2 C, s), 79.84 (1 C, s), 44.15 (2 C, s), 43.11 (1 C, br s), 28.53 (2 C, s), 28.41 (3 C, s)

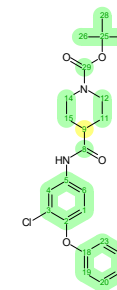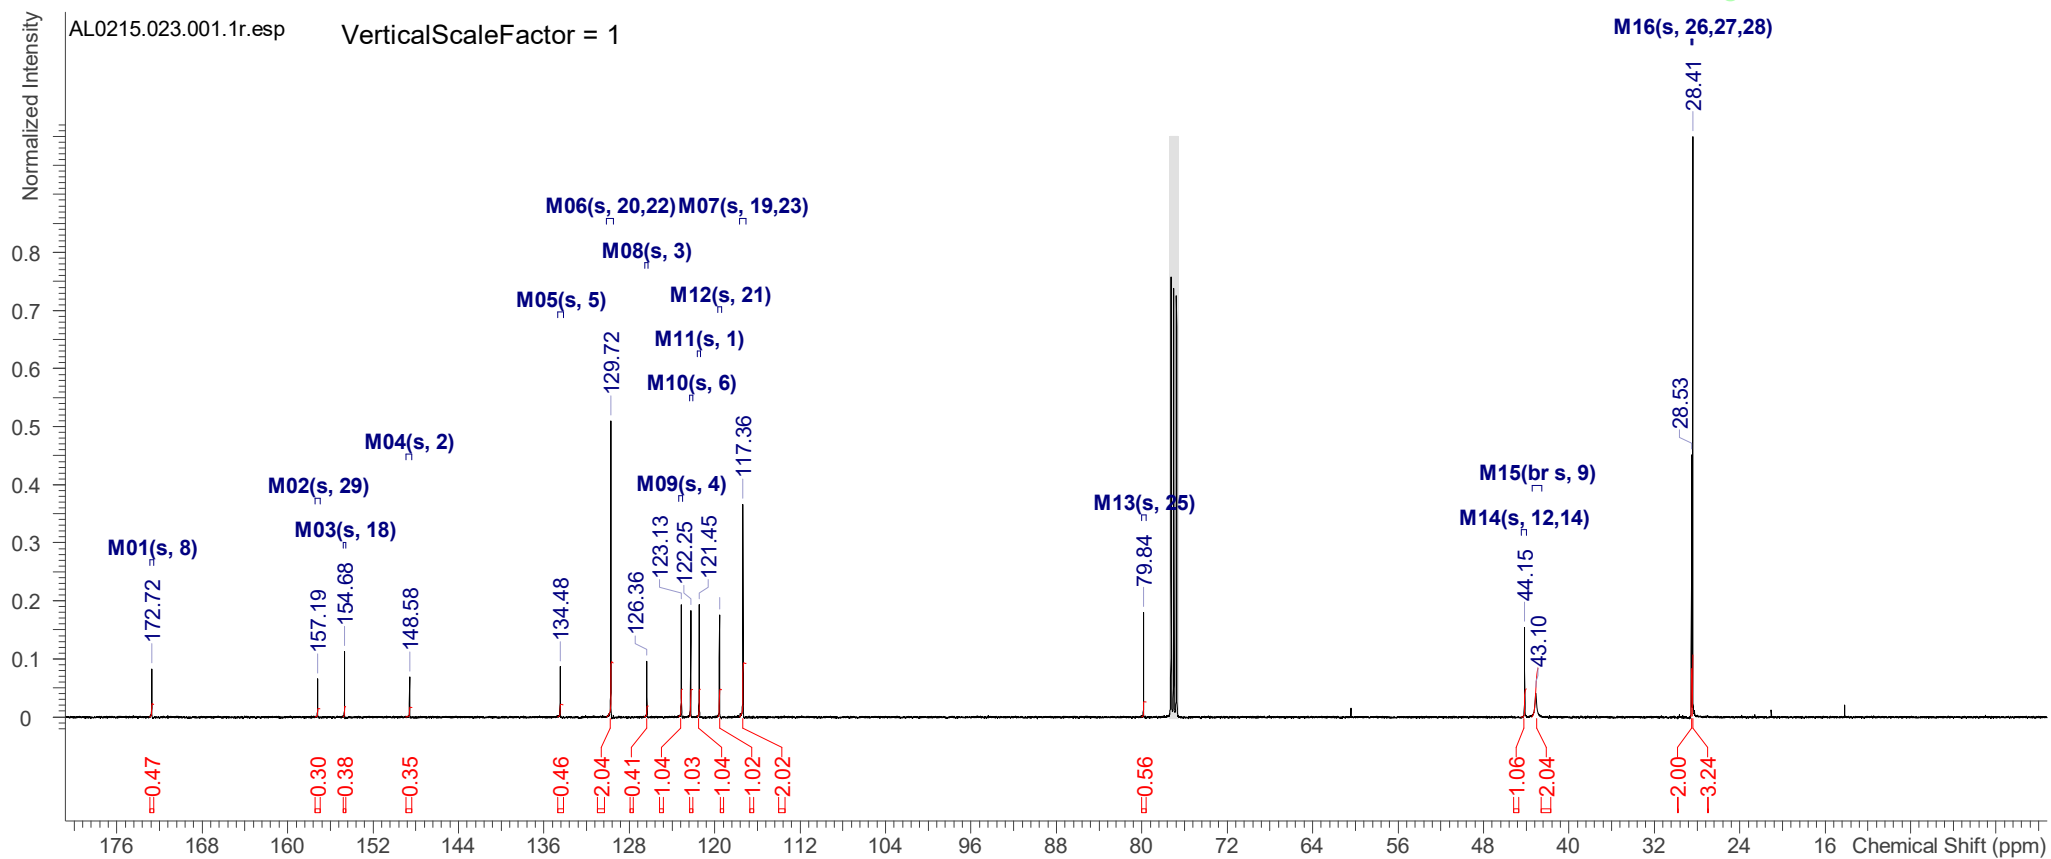

Compound 6c

4/12/2022 1:44:17 PM

|                  |                                        |                          |       |
|------------------|----------------------------------------|--------------------------|-------|
| Number of Nuclei | 26 H's / 26 H's (spectrum / structure) | Multiplets Integrals Sum | 26.06 |
|------------------|----------------------------------------|--------------------------|-------|

<sup>1</sup>H NMR (500 MHz, CHLOROFORM-*d*, ppm)  $\delta$ = 7.98 (1 H, d, J = 2.59 Hz), 7.92 (1 H, s), 7.83 (1 H, dd, J = 9.08, 2.67 Hz), 7.69 – 7.64 (2 H, m), 7.08 – 7.06 (2 H, m), 7.04 (1 H, d, J = 9.00 Hz), 4.19 (2 H, m), 2.81 (2 H, m), 2.45 (1 H, m), 1.95 – 1.86 (2 H, m), 1.75 (2 H, m), 1.47 (9 H, s);

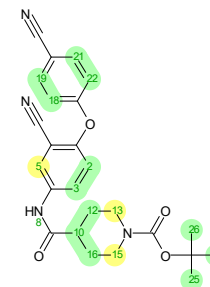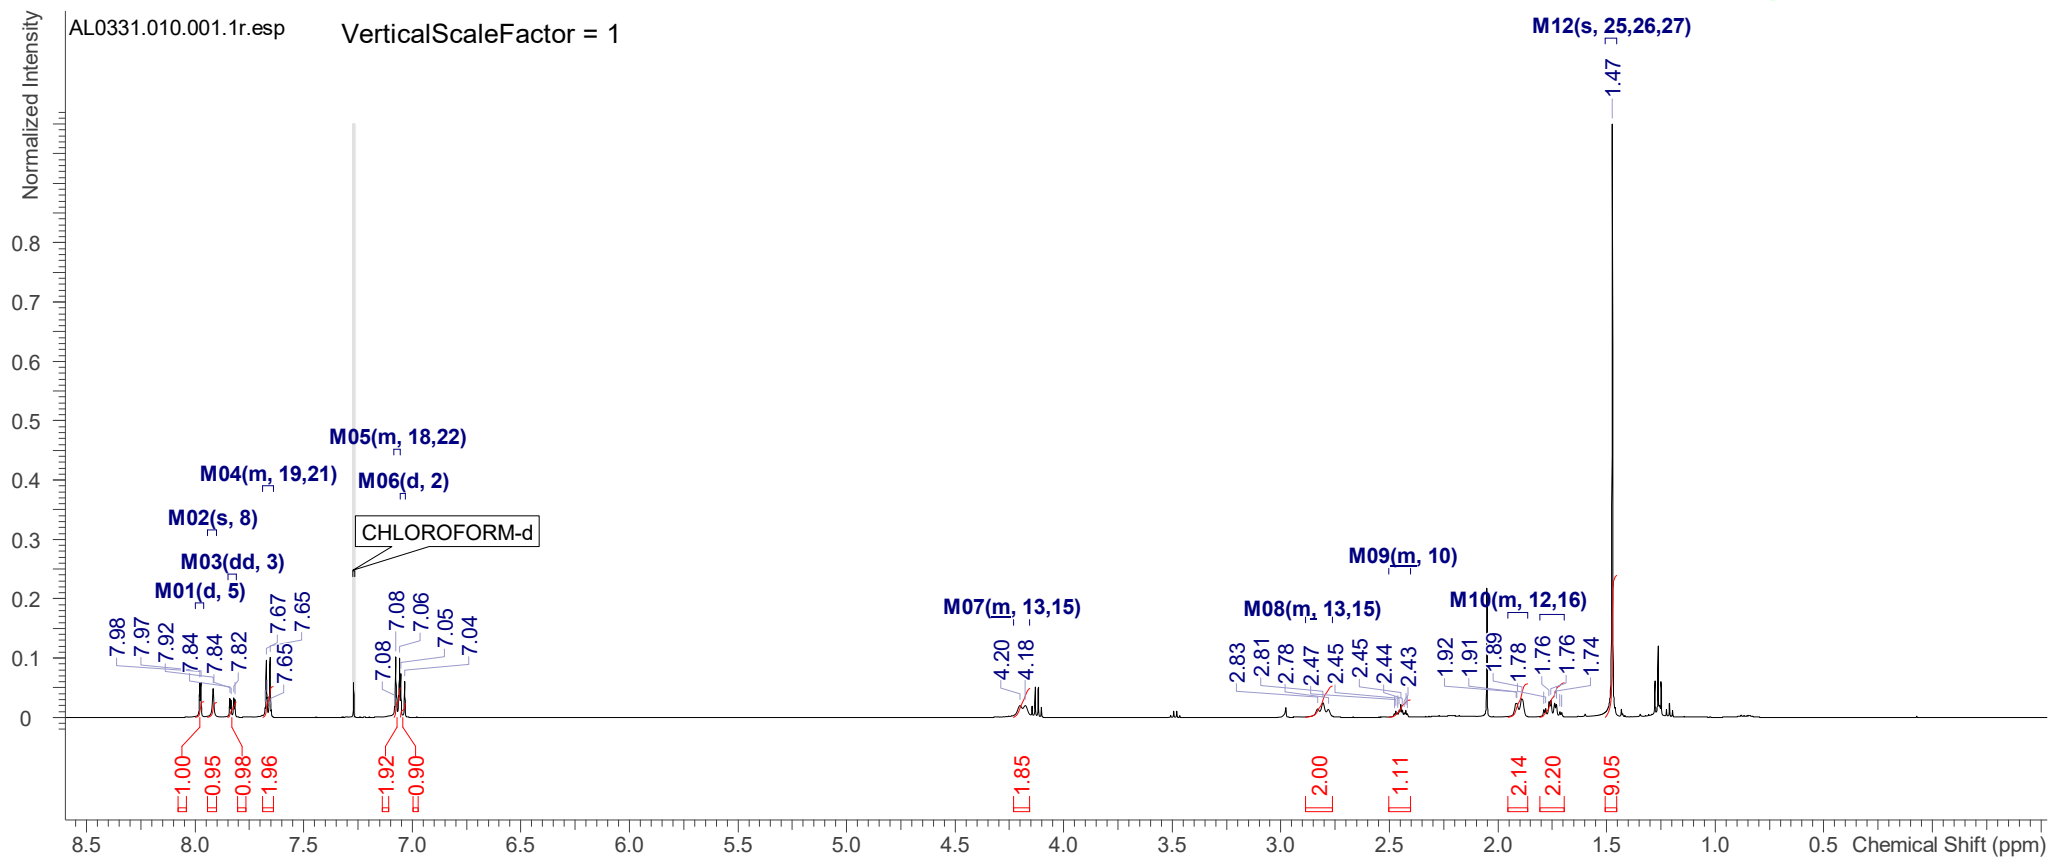

Compound 6c

4/12/2022 1:44:22 PM

|                         |                                        |                                       |
|-------------------------|----------------------------------------|---------------------------------------|
| <b>Number of Nuclei</b> | 25 C's / 25 C's (spectrum / structure) | <b>Multiplets Integrals Sum</b> 28.36 |
|-------------------------|----------------------------------------|---------------------------------------|

<sup>13</sup>C NMR (126 MHz, CHLOROFORM-d, ppm) δ= 173.1 (1 C, s), 158.0 (1 C, s), 154.7 (1 C, s), 152.6 (1 C, s), 135.4 (1 C, s), 134.4 (2 C, s), 126.1 (1 C, s), 124.7 (1 C, s), 120.8 (1 C, s), 118.4 (2 C, s), 118.3 (1 C, s), 114.8 (1 C, s), 107.5 (1 C, s), 106.0 (1 C, s), 80.0 (1 C, s), 44.1 (2 C, s), 43.1 (1 C, br s), 28.4 (3 C, s), 28.4 – 28.4 (2 C, m)

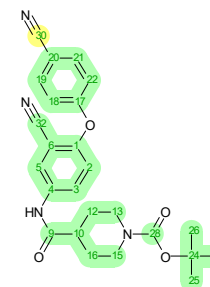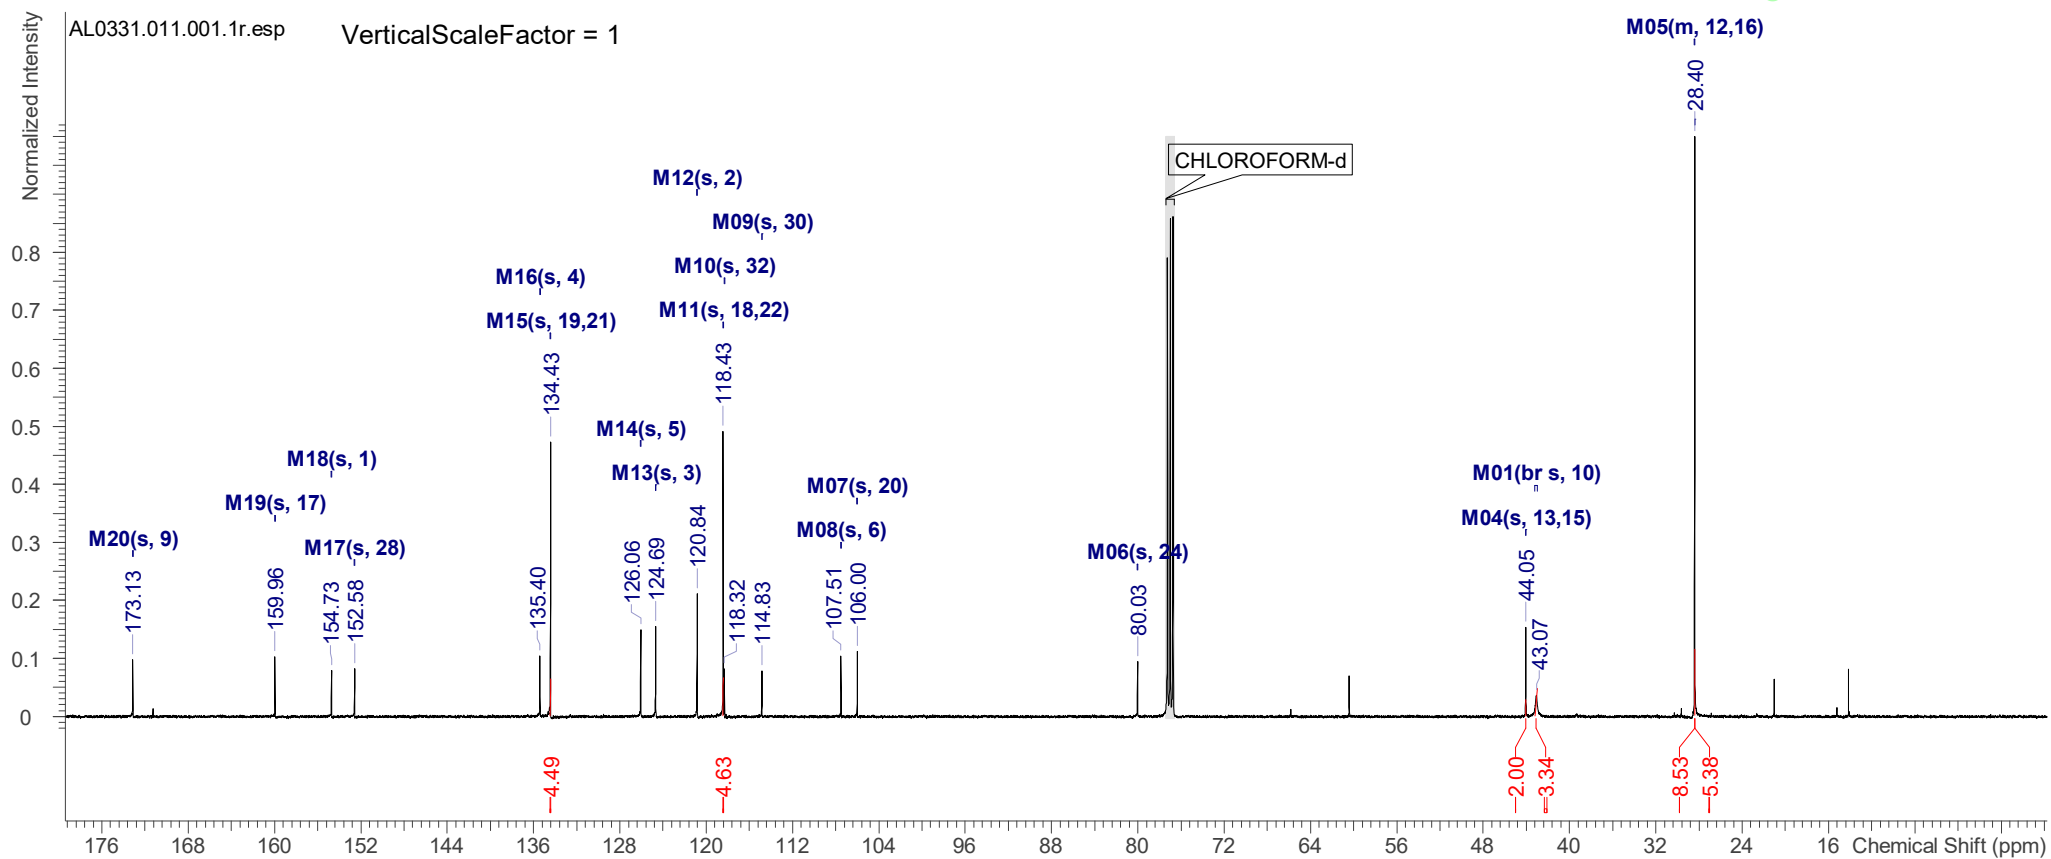

Compound 6d

4/2/2024 9:30:04 AM

|                         |                                        |                                       |
|-------------------------|----------------------------------------|---------------------------------------|
| <b>Number of Nuclei</b> | 26 H's / 26 H's (spectrum / structure) | <b>Multiplets Integrals Sum</b> 25.10 |
|-------------------------|----------------------------------------|---------------------------------------|

<sup>1</sup>H NMR (500 MHz, CHLOROFORM-*d*, ppm) δ= 7.63 (1 H, br dd, J = 12.13, 4.04 Hz), 7.48 (1 H, br d, J = 3.81 Hz), 7.17 – 7.10 (1 H, m), 7.04 – 6.90 (5 H, m), 4.21 (2 H, br s), 2.80 (2 H, br s), 2.80 (2 H, br s), 2.45 – 2.37 (1 H, m), 1.91 – 1.75 (4 H, m), 1.48 (9 H, s);

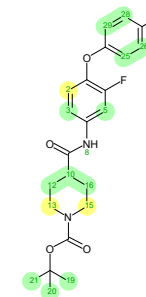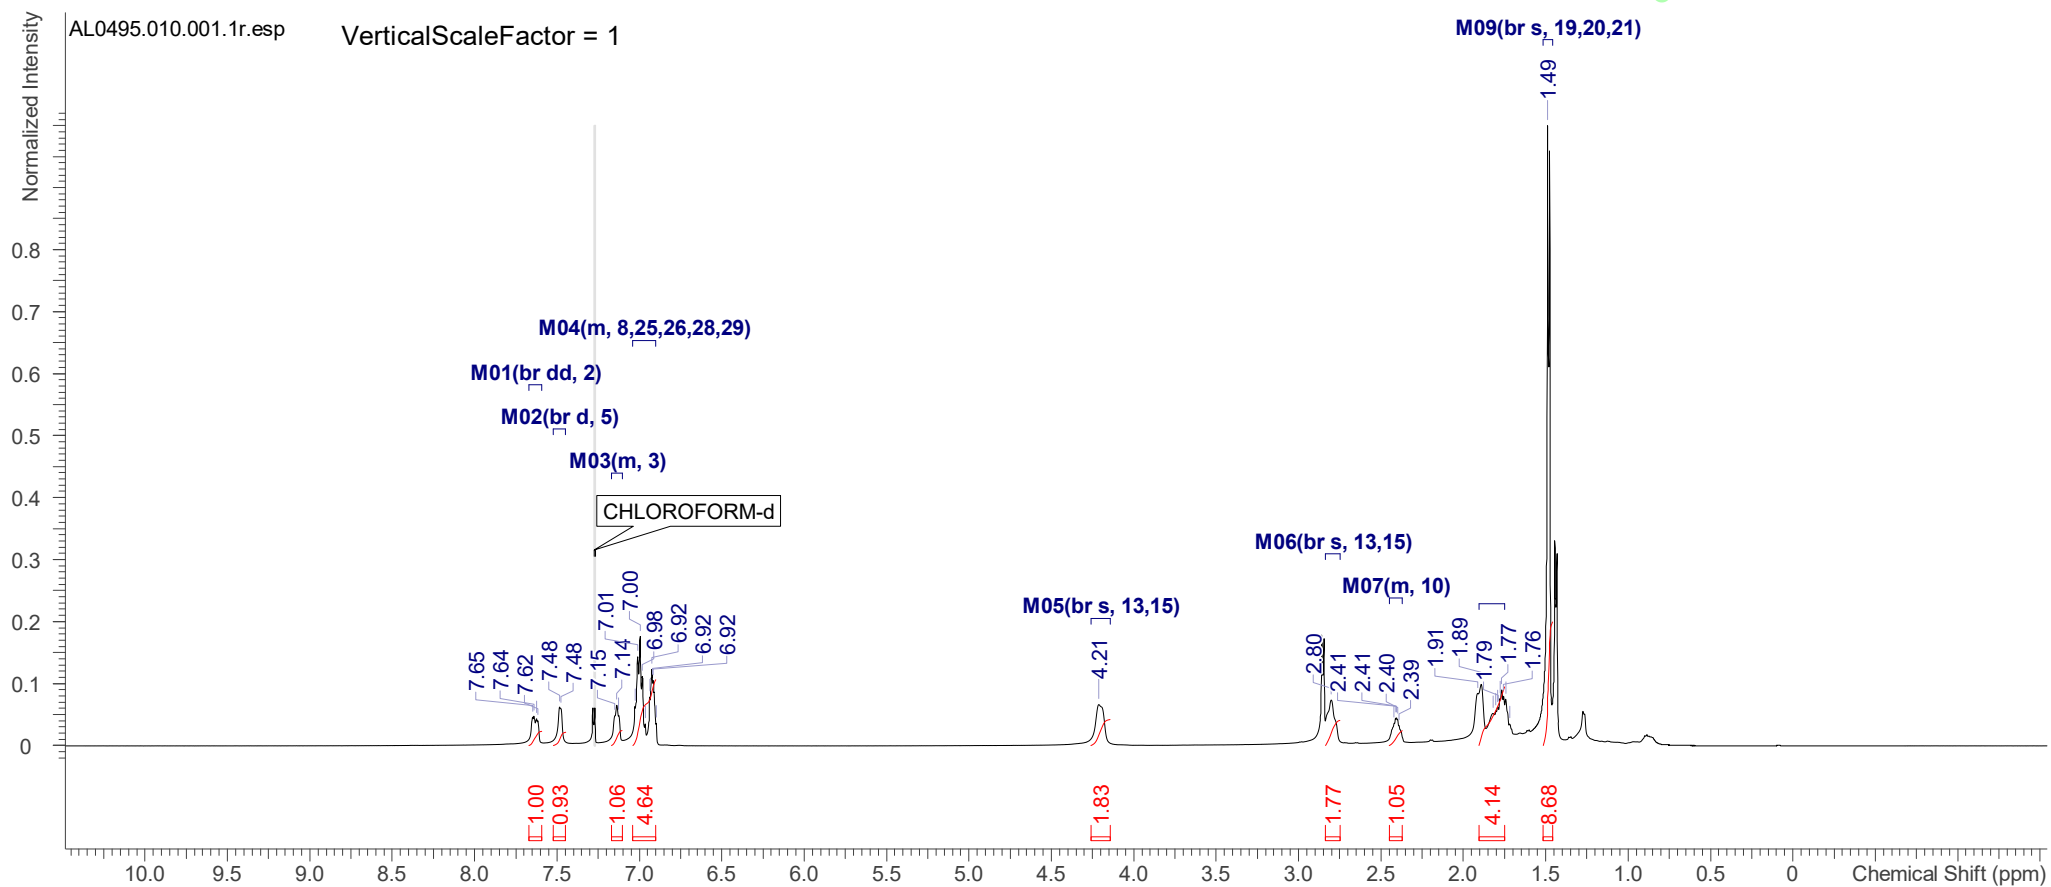

Compound 6d

4/2/2024 9:30:08 AM

|                  |                                        |                          |      |
|------------------|----------------------------------------|--------------------------|------|
| Number of Nuclei | 23 C's / 23 C's (spectrum / structure) | Multiplets Integrals Sum | 0.00 |
|------------------|----------------------------------------|--------------------------|------|

<sup>13</sup>C NMR (126 MHz, CHLOROFORM-d, ppm) δ= 28.4 (3 C, s), 28.5 (2 C, s), 43.1 (2 C, s), 44.2 (1 C, s), 79.8 (1 C, s), 109.5 (1 C, d, J = 22.98 Hz), 115.7 (1 C, d, J = 3.68 Hz), 116.2 (2 C, d, J = 23.90 Hz), 118.3 (2 C, d, J = 8.27 Hz), 121.8 (1 C, s), 134.7 (1 C, d, J = 10.11 Hz), 140.1 (1 C, d, J = 11.03 Hz), 153.9 (1 C, d, J = 249.10 Hz), 153.4 (1 C, d, J = 1.84 Hz), 154.7 (1 C, s), 158.5 (1 C, d, J = 240.83 Hz), 172.7 (1 C, s);

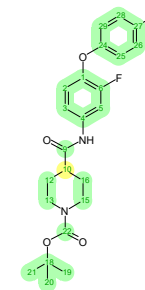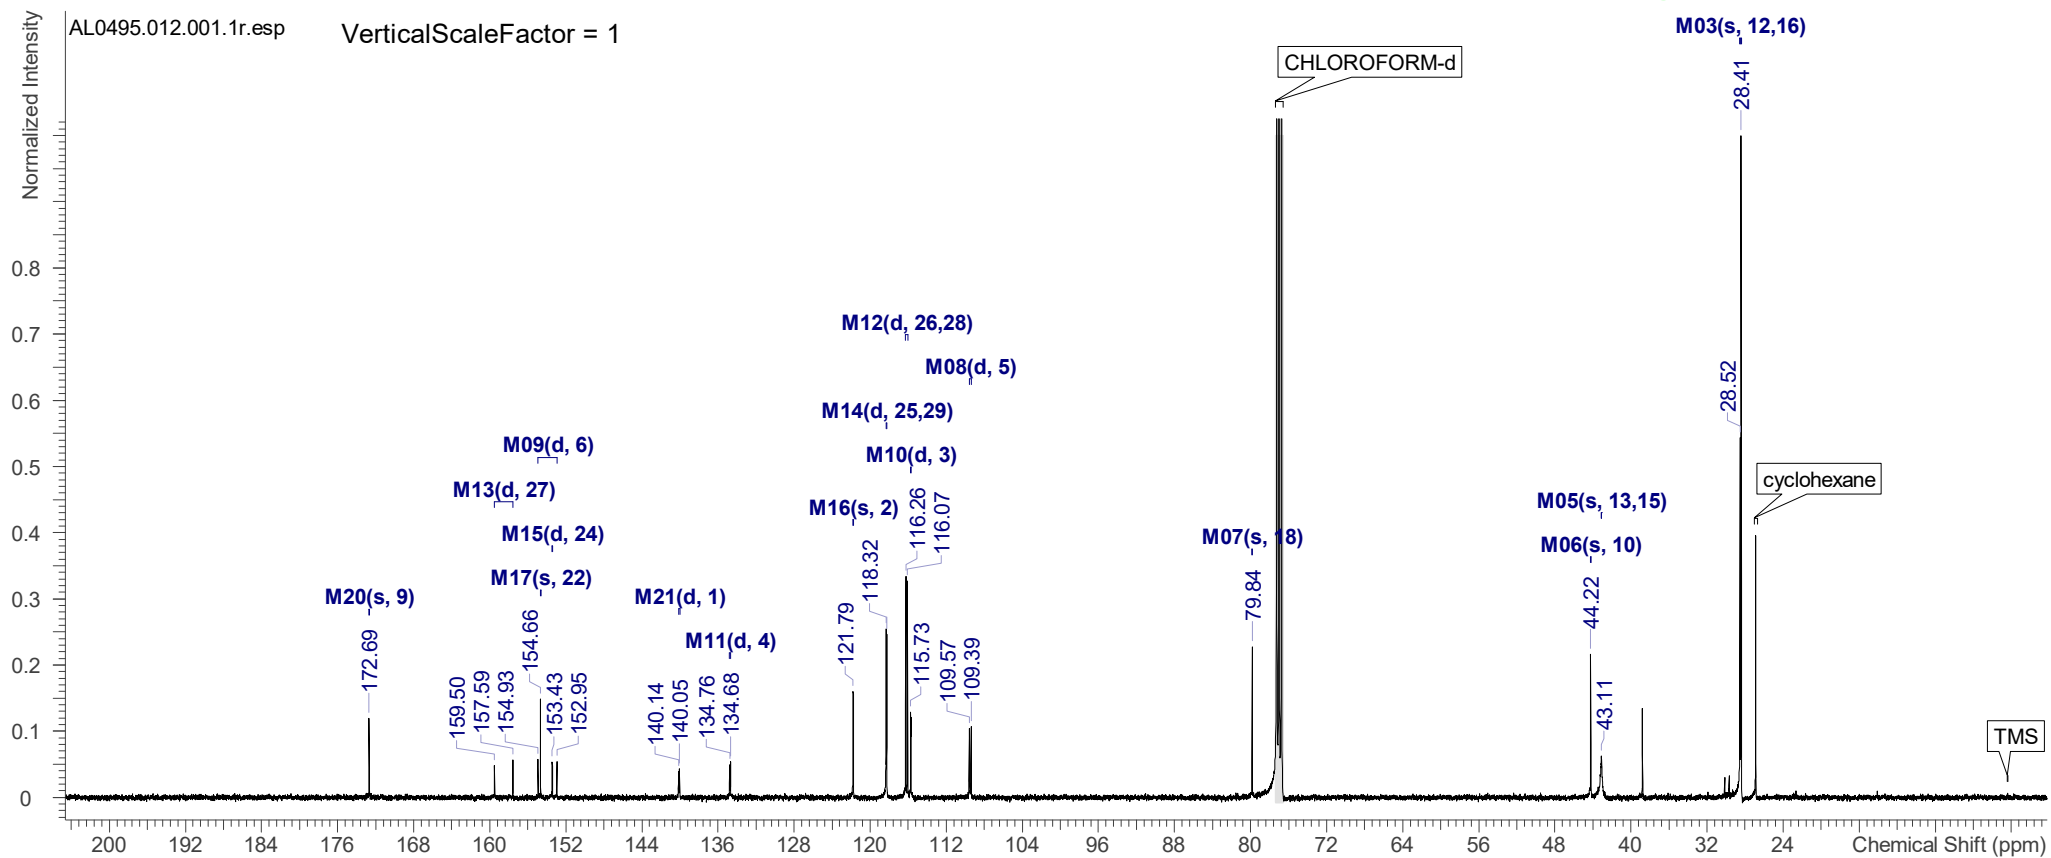

Compound 6d

4/2/2024 9:30:11 AM

|                  |                                      |                          |      |
|------------------|--------------------------------------|--------------------------|------|
| Number of Nuclei | 2 F's / 2 F's (spectrum / structure) | Multiplets Integrals Sum | 3.20 |
|------------------|--------------------------------------|--------------------------|------|

$^{19}\text{F}$  NMR (470 MHz, CHLOROFORM-*d*, ppm)  $\delta$ = -128.3 (1 F, br d,  $J$  = 12.14 Hz), -120.7 (1 F, br s)

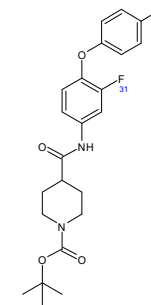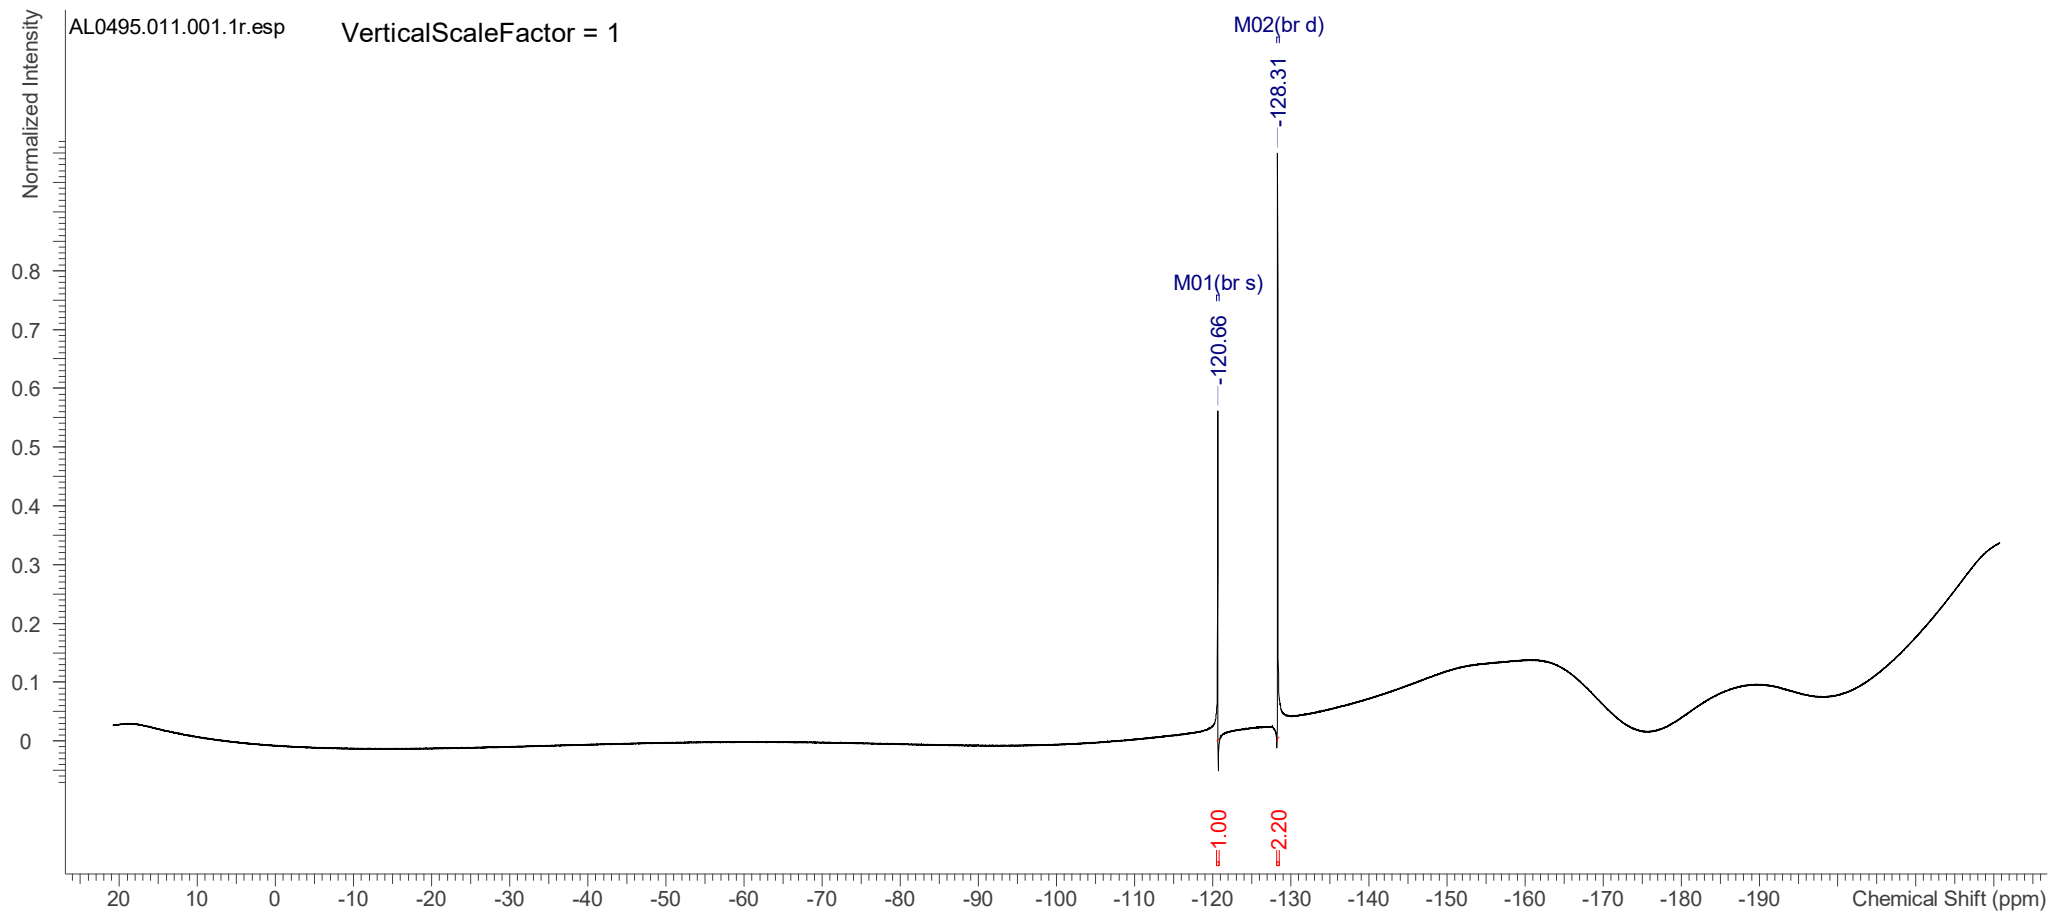

Compound 6e

4/2/2024 9:30:39 AM

|                         |                                        |                                       |
|-------------------------|----------------------------------------|---------------------------------------|
| <b>Number of Nuclei</b> | 26 H's / 26 H's (spectrum / structure) | <b>Multiplets Integrals Sum</b> 26.55 |
|-------------------------|----------------------------------------|---------------------------------------|

<sup>1</sup>H NMR (500 MHz, CHLOROFORM-d, ppm) δ= 7.64 (1 H, dd, J = 12.21, 2.29 Hz), 7.33 (1 H, s), 7.27 – 7.24 (2 H, m), 7.14 (1 H, br d, J = 8.85 Hz), 7.05 – 7.01 (1 H, m), 6.90 – 6.85 (2 H, m), 4.20 (2 H, m), 2.85 – 2.77 (2 H, m), 2.40 (1 H, m), 1.94 – 1.88 (2 H, m), 1.75 (2 H, m), 1.48 (9 H, s);

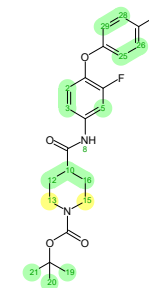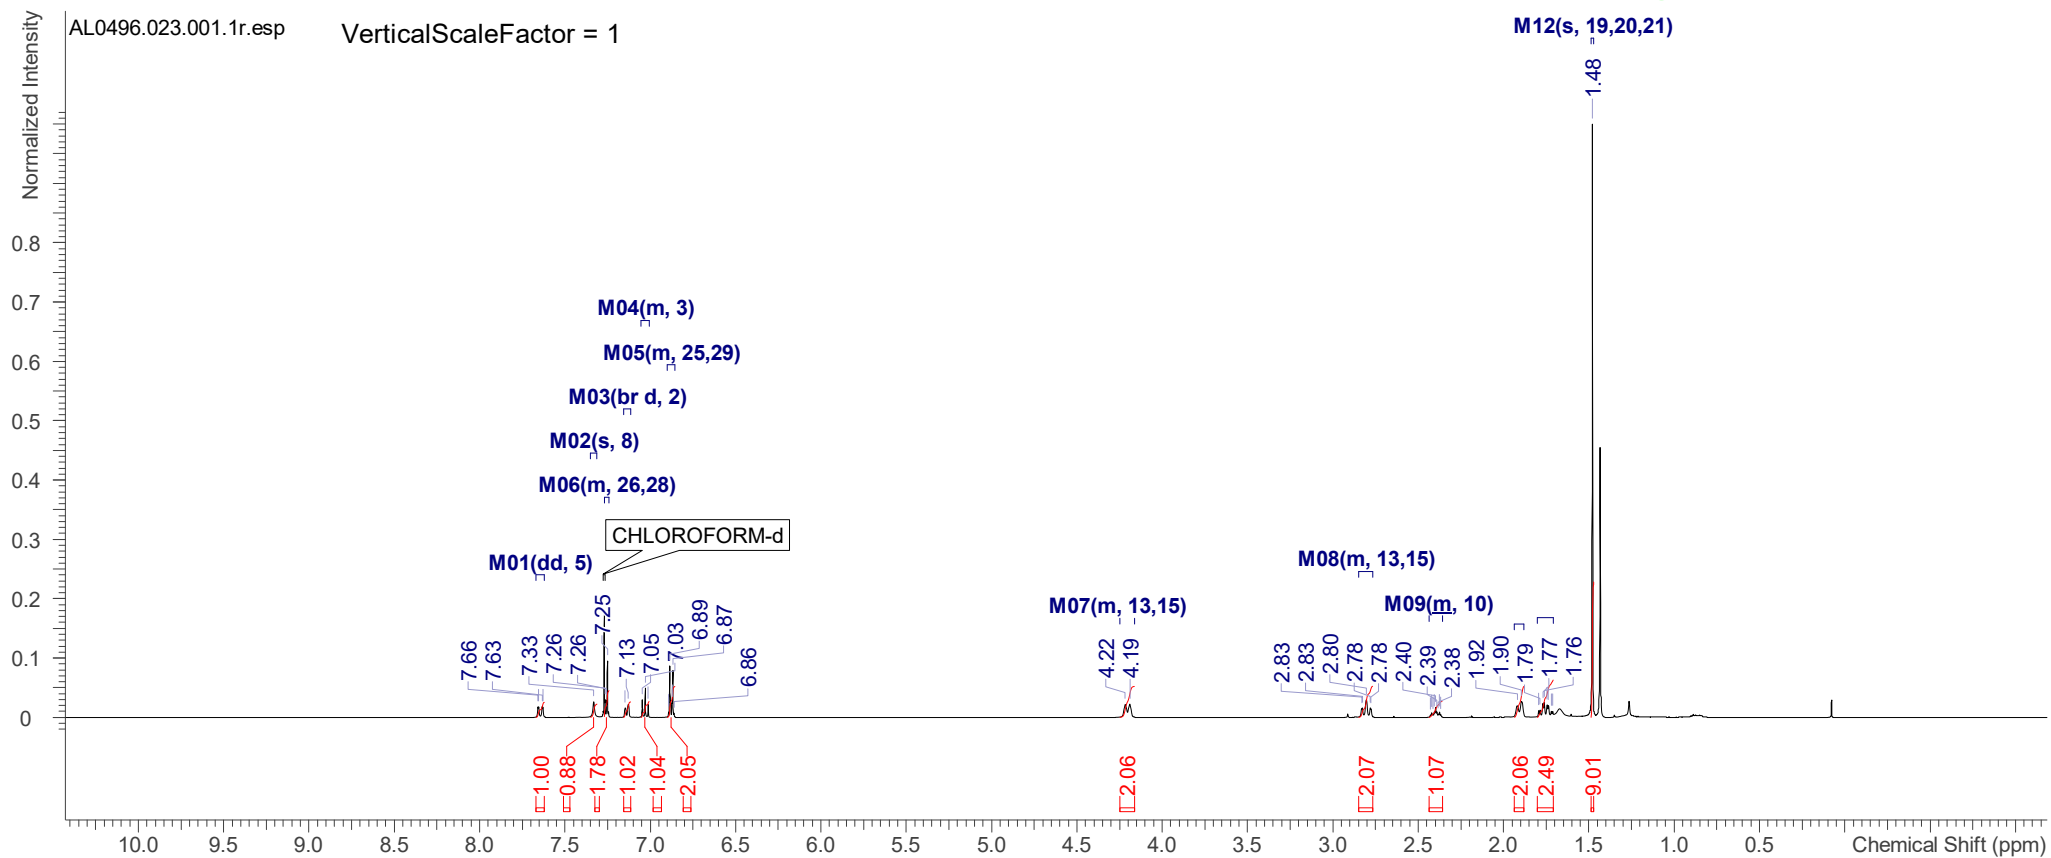

Compound 6e

4/2/2024 9:30:43 AM

|                  |                                        |                          |      |
|------------------|----------------------------------------|--------------------------|------|
| Number of Nuclei | 23 C's / 23 C's (spectrum / structure) | Multiplets Integrals Sum | 0.00 |
|------------------|----------------------------------------|--------------------------|------|

<sup>13</sup>C NMR (126 MHz, CHLOROFORM-d, ppm) δ = 28.4 (3 C, s), 28.5 (2 C, s), 43.1 (1 C, s), 44.3 (2 C, s), 79.9 (1 C, s), 109.5 (1 C, d, J = 22.98 Hz), 115.7 (1 C, d, J = 2.76 Hz), 117.9 (2 C, s), 122.4 (1 C, s), 128.0 (1 C, s), 129.6 (2 C, s), 135.1 (1 C, d, J = 10.11 Hz), 139.3 (1 C, d, J = 11.95 Hz), 154.2 (1 C, d, J = 249.10 Hz), 154.7 (1 C, s), 156.3 (1 C, s), 172.6 (1 C, s);

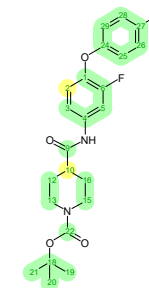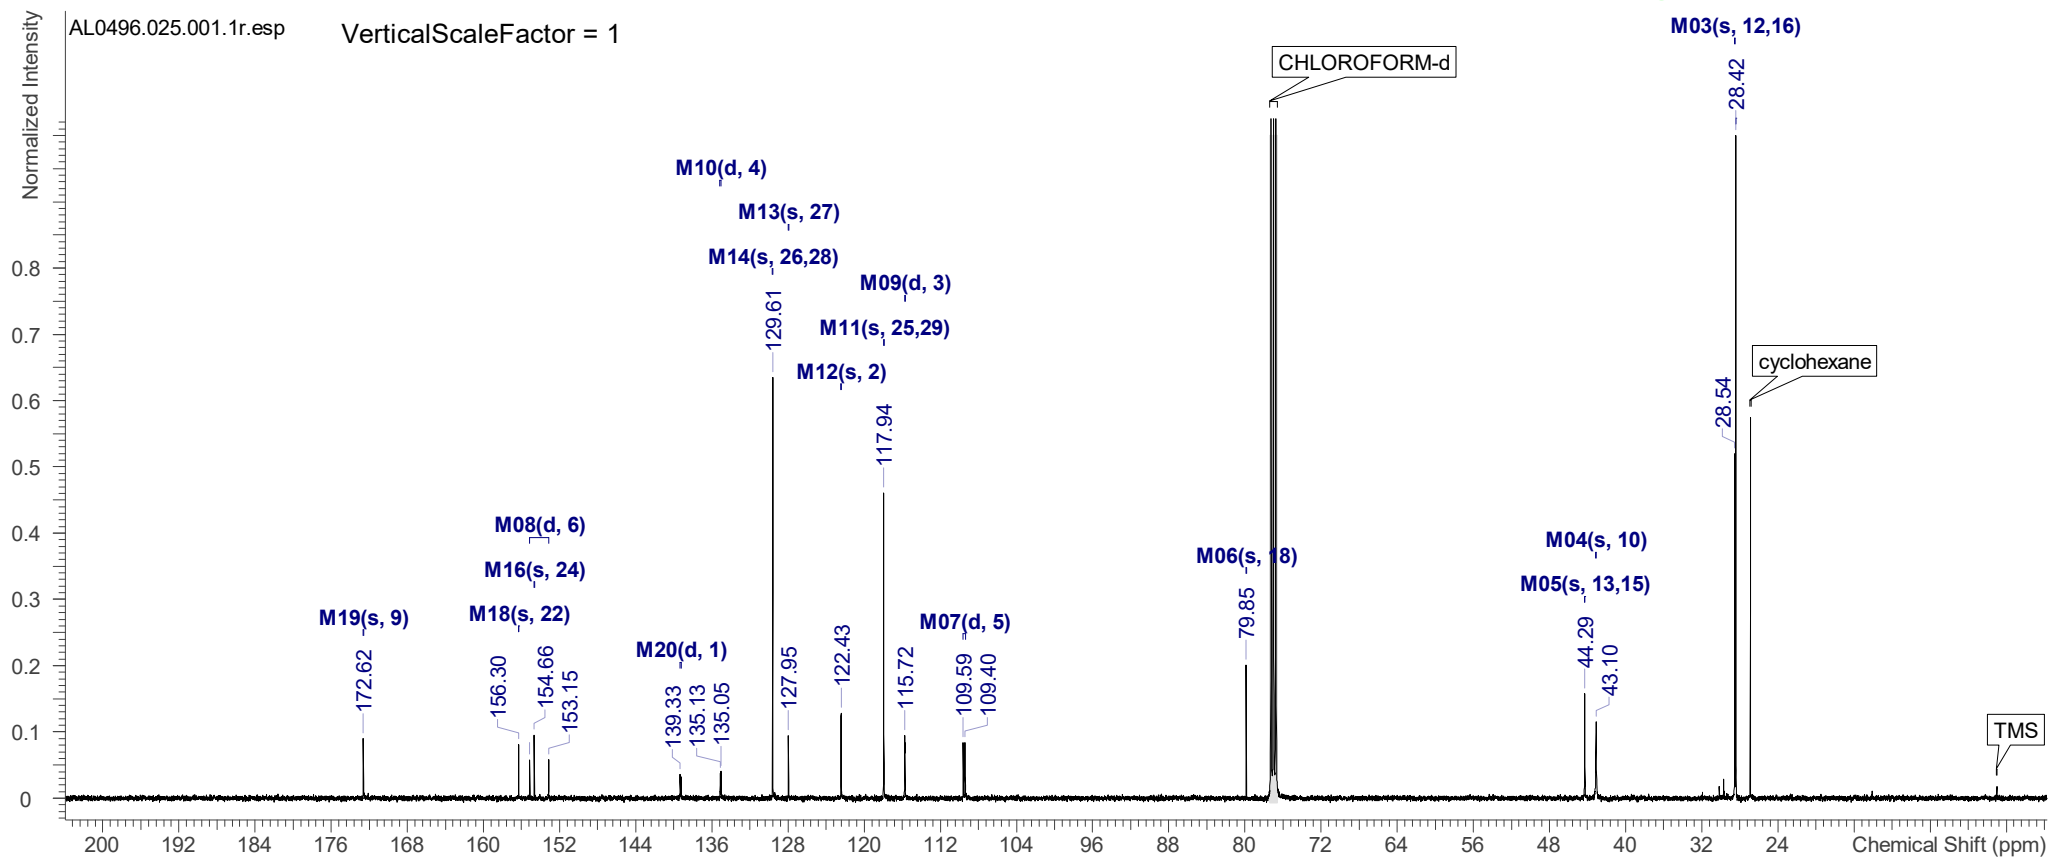

Compound 6e

4/2/2024 9:30:46 AM

|                  |                                      |                               |
|------------------|--------------------------------------|-------------------------------|
| Number of Nuclei | 1 F's / 1 F's (spectrum / structure) | Multiplets Integrals Sum 1.00 |
|------------------|--------------------------------------|-------------------------------|

19F NMR (470 MHz, CHLOROFORM-d, ppm)  $\delta$ = -127.6 (1 F, br dd, J = 12.14, 8.67 Hz)

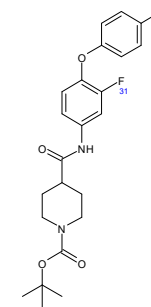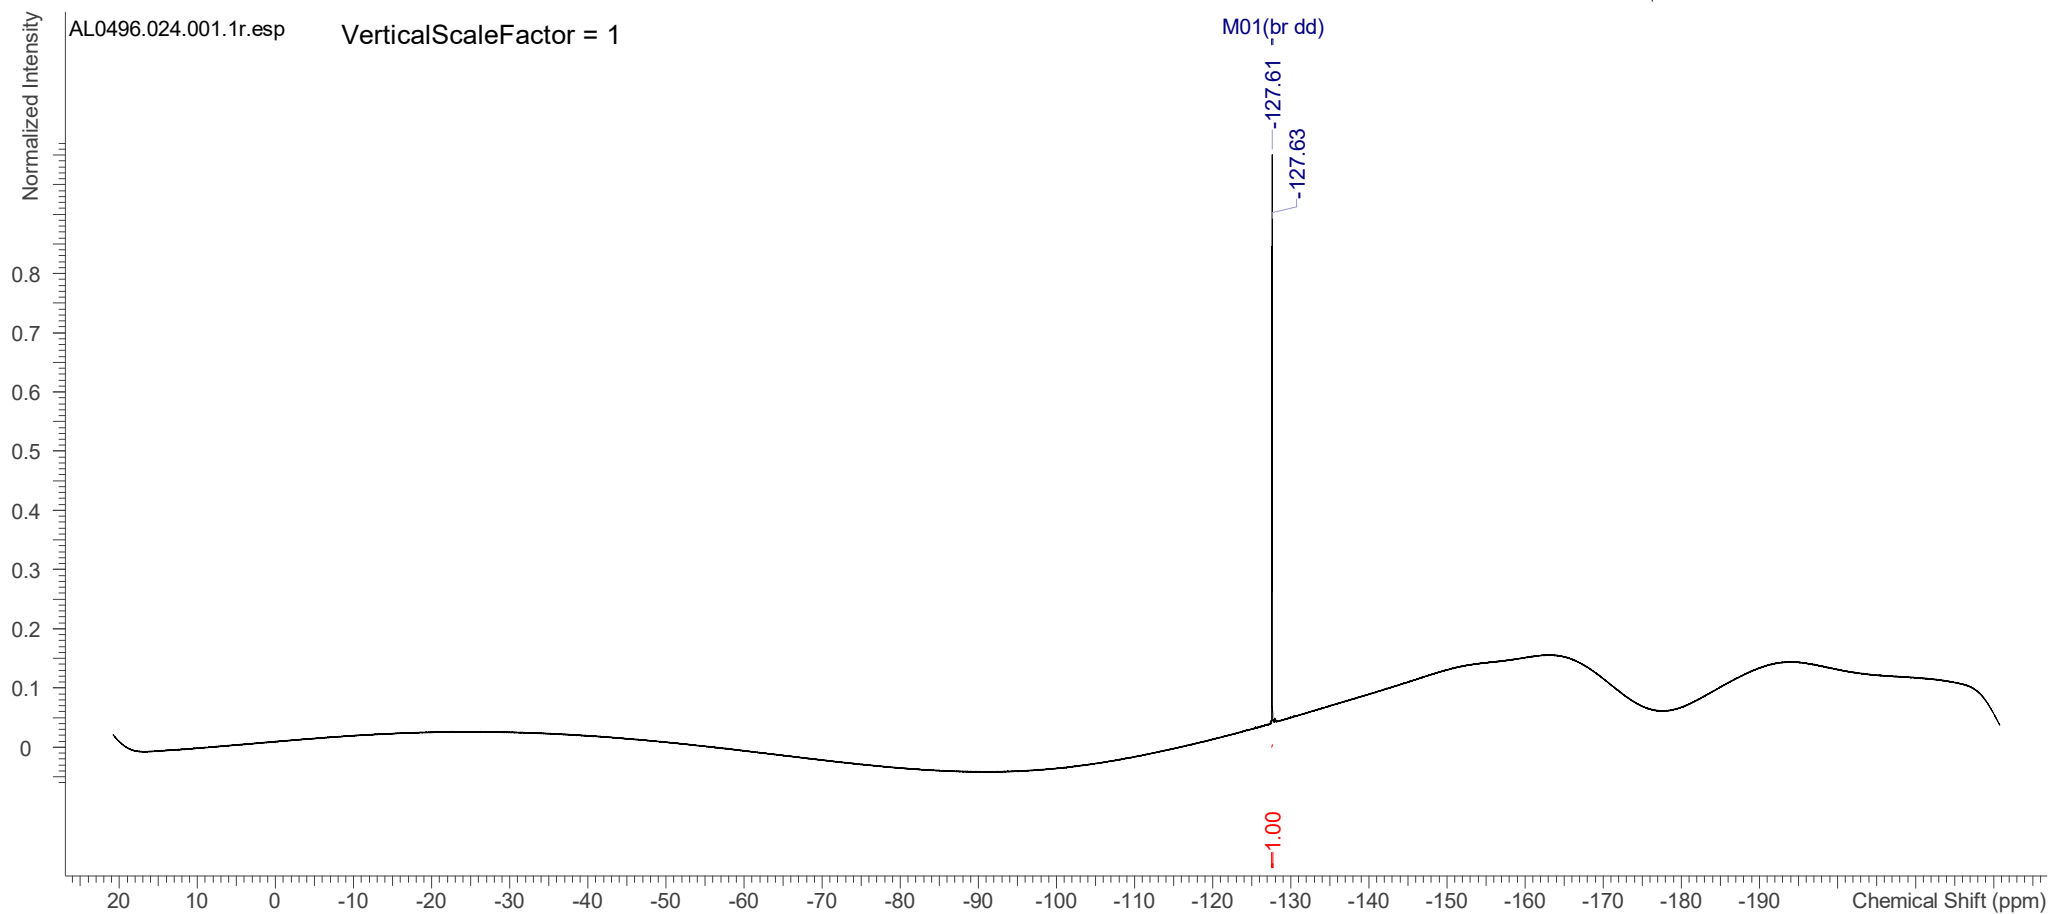

Compound 6f

4/2/2024 9:31:01 AM

|                         |                                        |                                       |
|-------------------------|----------------------------------------|---------------------------------------|
| <b>Number of Nuclei</b> | 26 H's / 26 H's (spectrum / structure) | <b>Multiplets Integrals Sum</b> 26.07 |
|-------------------------|----------------------------------------|---------------------------------------|

<sup>1</sup>H NMR (500 MHz, CHLOROFORM-d, ppm) δ = 7.75 (2 H, br d, J = 2.29 Hz), 7.37 (1 H, dd, J = 8.85, 2.29 Hz), 7.03 – 6.97 (2 H, m), 6.93 – 6.86 (3 H, m), 4.18 (2 H, m), 2.78 (2 H, m), 2.41 (1 H, m), 1.88 (2 H, m), 1.74 (2 H, m), 1.47 (9 H, s);

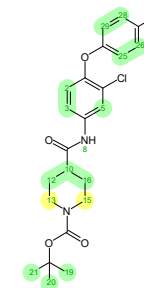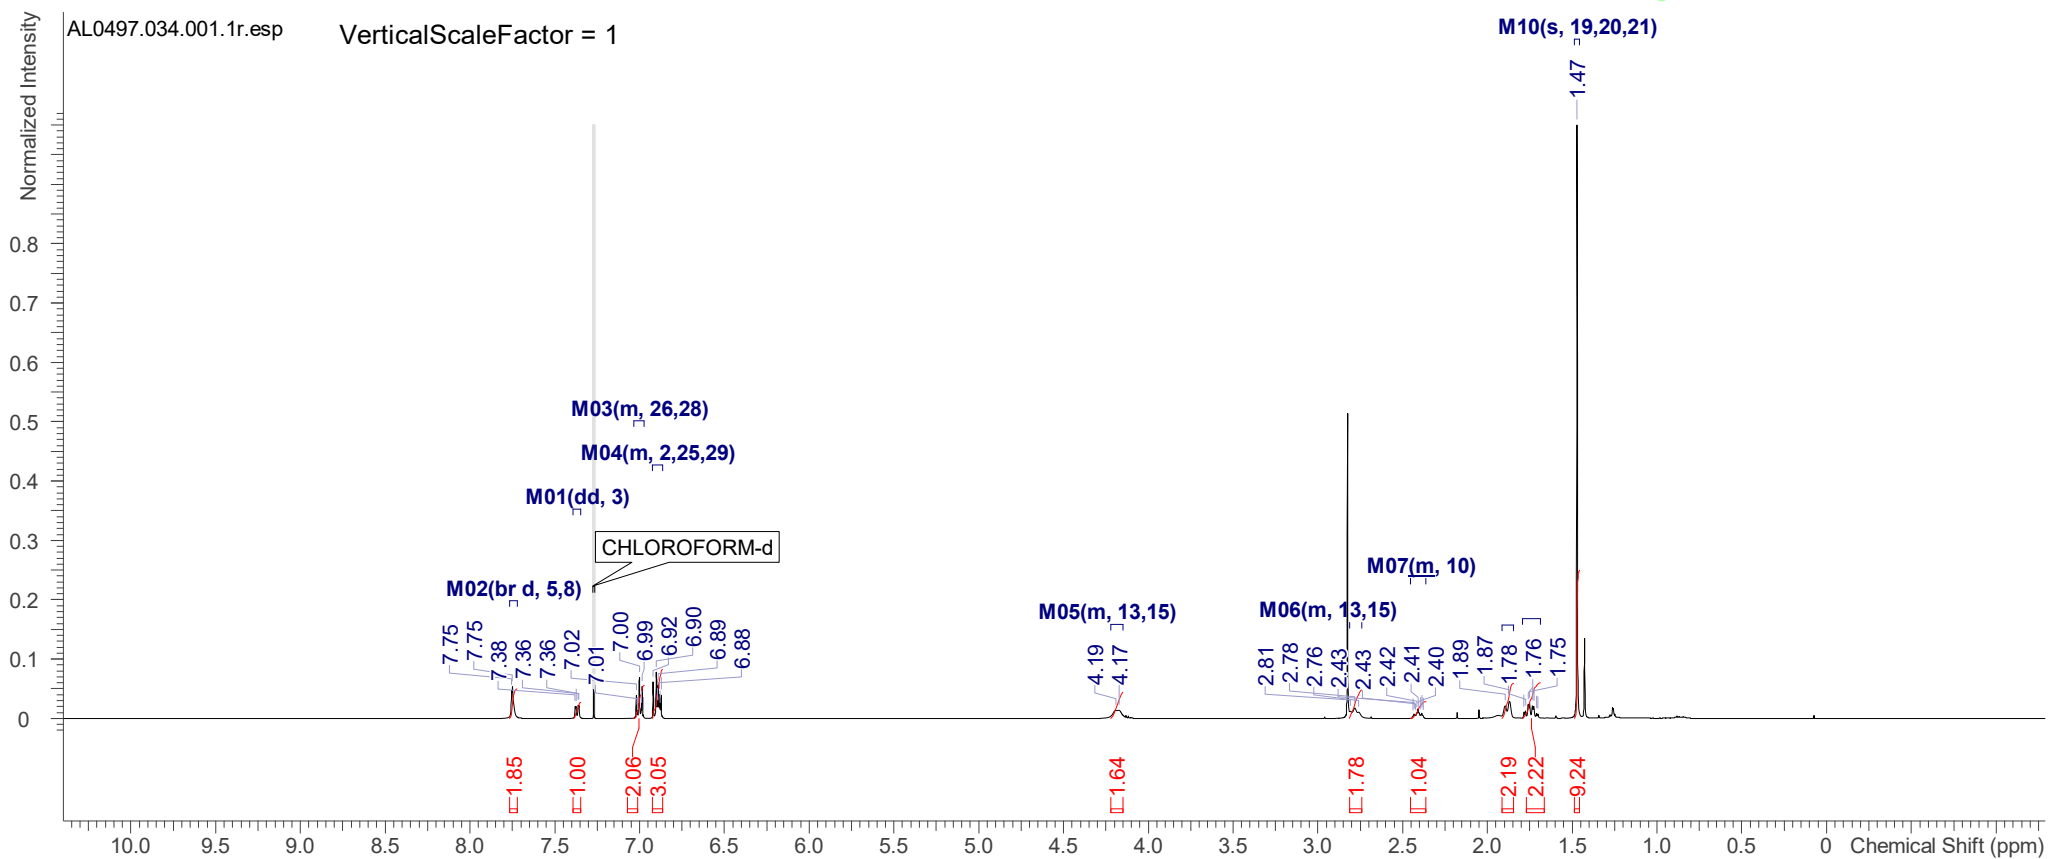

Compound 6f

4/2/2024 9:31:05 AM

|                  |                                        |                               |
|------------------|----------------------------------------|-------------------------------|
| Number of Nuclei | 19 C's / 23 C's (spectrum / structure) | Multiplets Integrals Sum 5.40 |
|------------------|----------------------------------------|-------------------------------|

<sup>13</sup>C NMR (126 MHz, CHLOROFORM-d, ppm) δ= 28.4 (1 C, s), 28.5 (1 C, s), 43.1 (1 C, br s), 44.1 (1 C, s), 79.8 (1 C, s), 116.2 (2 C, d, J = 23.90 Hz), 118.9 (2 C, d, J = 8.27 Hz), 119.6 (1 C, s), 120.8 (1 C, s), 122.3 (1 C, s), 126.0 (1 C, s), 134.6 (1 C, s), 148.8 (1 C, s), 153.0 (1 C, d, J = 2.76 Hz), 154.7 (1 C, s), 158.6 (1 C, d, J = 241.75 Hz), 172.9 (1 C, s);

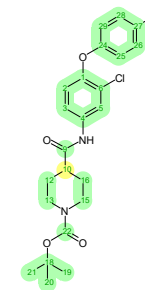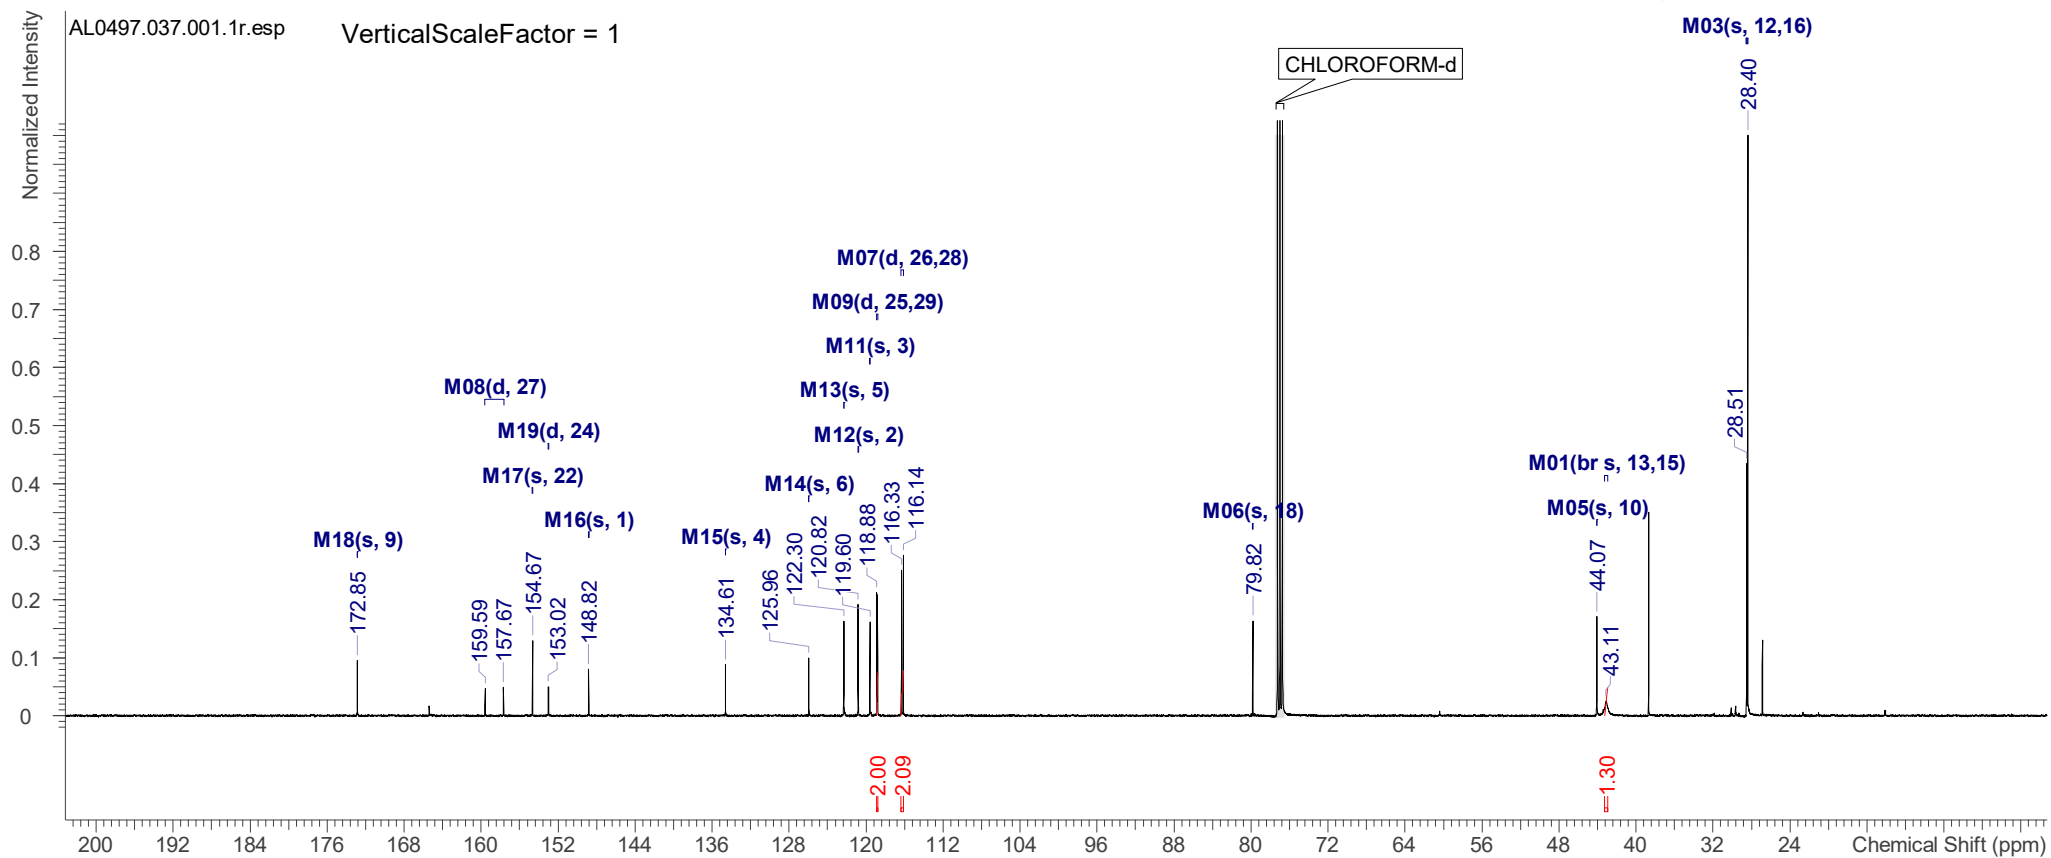

Compound 6f

4/2/2024 9:31:08 AM

|                         |                                      |                                 |      |
|-------------------------|--------------------------------------|---------------------------------|------|
| <b>Number of Nuclei</b> | 1 F's / 1 F's (spectrum / structure) | <b>Multiplets Integrals Sum</b> | 1.00 |
|-------------------------|--------------------------------------|---------------------------------|------|

19F NMR (470 MHz, CHLOROFORM-d, ppm)  $\delta$ = -120.4 – -120.3 (1 F, m)

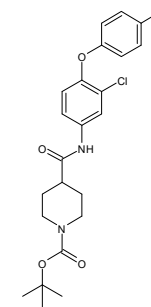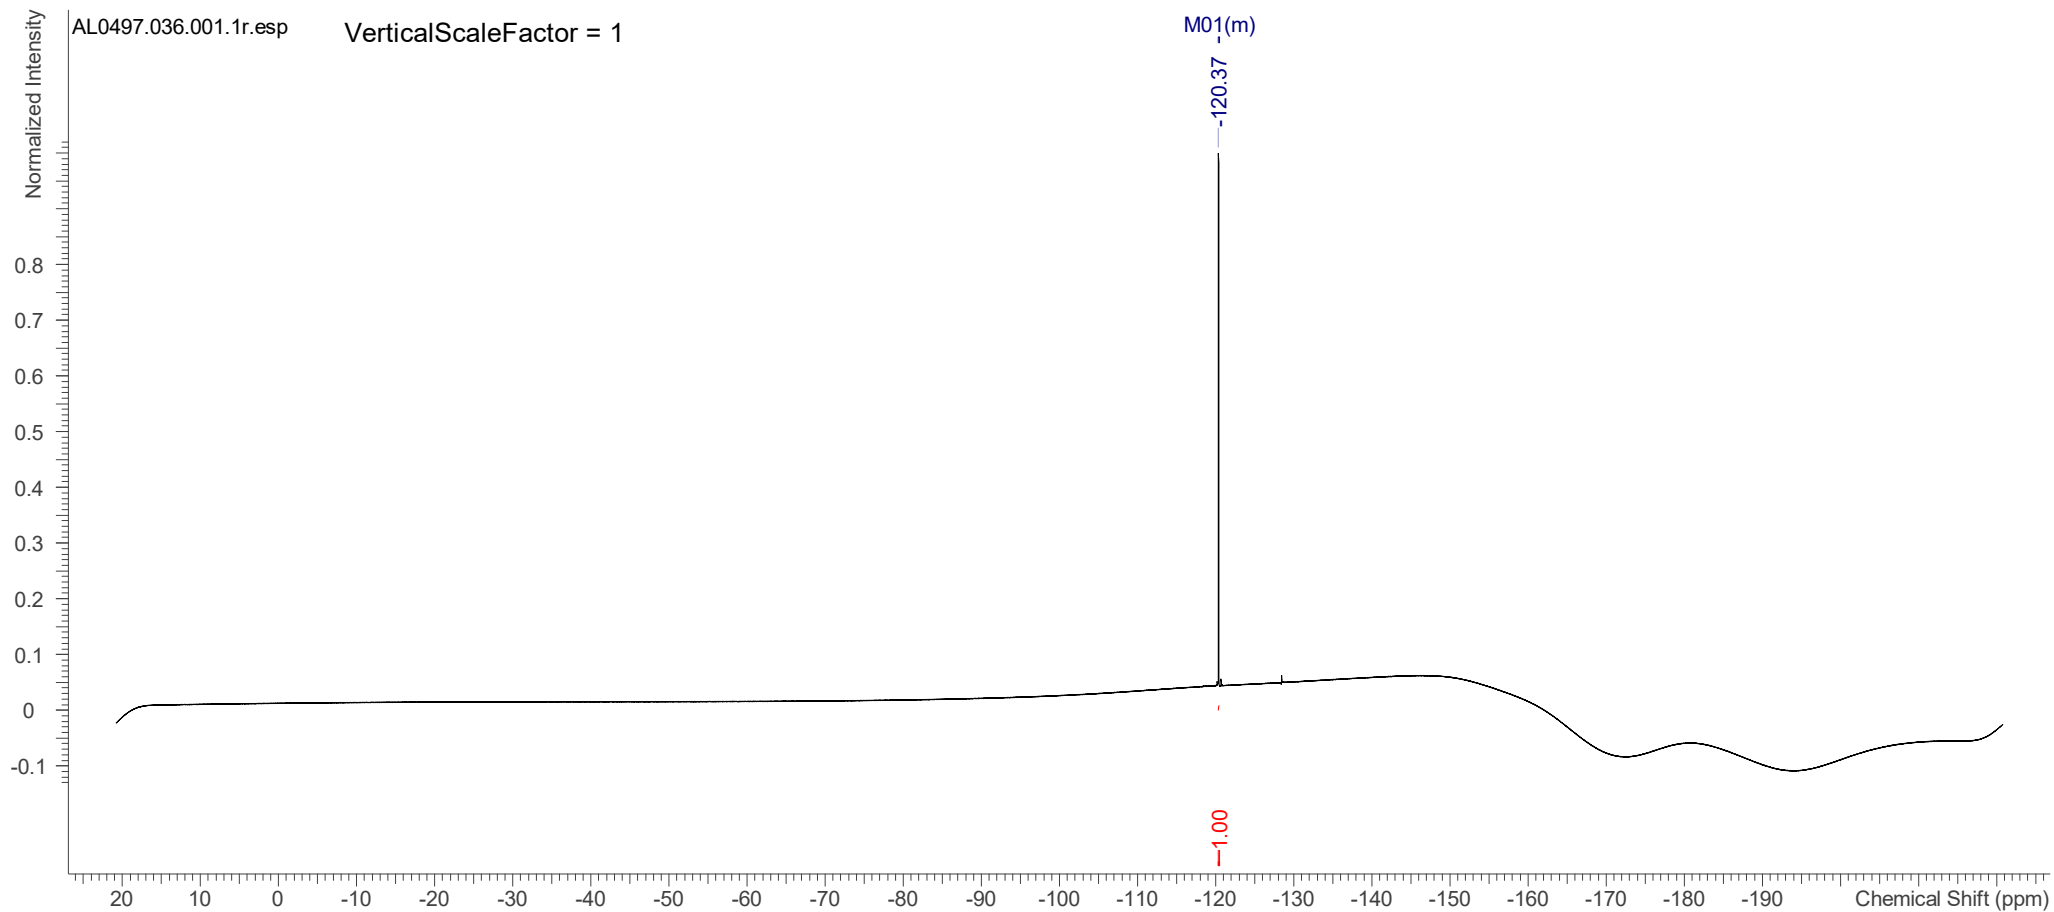

Compound 6g

7/19/2023 8:33:41 AM

|                                       |                                                                |
|---------------------------------------|----------------------------------------------------------------|
| <b>Multiplets Integrals Sum</b> 26.92 | <b>Number of Nuclei</b> 26 H's / 26 H's (spectrum / structure) |
|---------------------------------------|----------------------------------------------------------------|

<sup>1</sup>H NMR (500 MHz, CHLOROFORM-d, ppm) δ= 7.77 (1 H, d, J = 1.98 Hz), 7.45 (1 H, br s), 7.43 – 7.36 (3 H, m), 6.98 (1 H, d, J = 8.85 Hz), 6.79 (2 H, d, J = 8.85 Hz), 4.20 (2 H, m), 2.80 (2 H, br s), 1.90 (2 H, m), 1.75 (3 H, m), 1.48 (9 H, s);

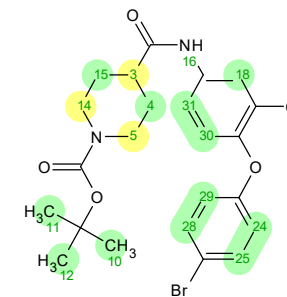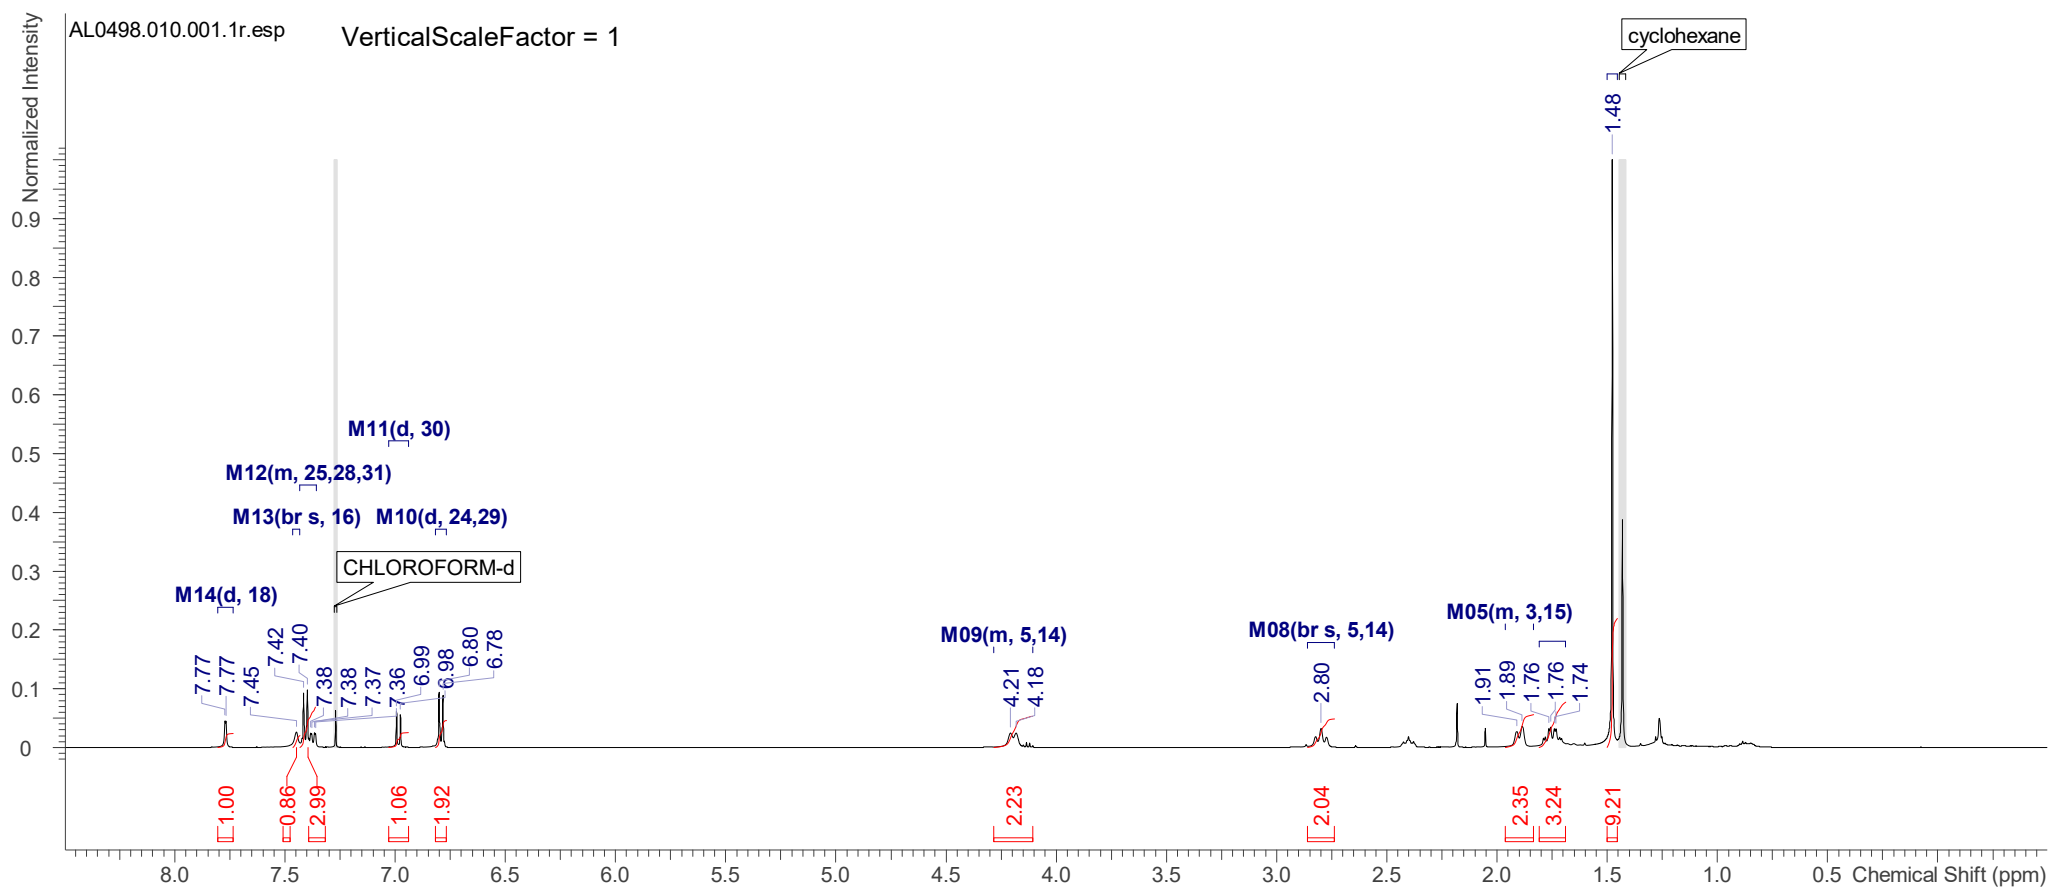

Compound 6g

7/19/2023 8:33:44 AM

|                                      |                                                                |
|--------------------------------------|----------------------------------------------------------------|
| <b>Multiplets Integrals Sum</b> 0.00 | <b>Number of Nuclei</b> 23 C's / 23 C's (spectrum / structure) |
|--------------------------------------|----------------------------------------------------------------|

<sup>13</sup>C NMR (126 MHz, CHLOROFORM-d, ppm) δ= 172.7 (1 C, s), 156.5 (1 C, s), 154.7 (1 C, s), 147.9 (1 C, s), 135.0 (1 C, s), 132.6 (2 C, s), 126.7 (1 C, s), 122.3 (1 C, s), 121.8 (1 C, s), 119.6 (1 C, s), 118.8 (2 C, s), 115.5 (1 C, s), 79.9 (1 C, s), 44.2 (2 C, s), 43.1 (1 C, s), 28.5 (2 C, s), 28.4 (3 C, s)

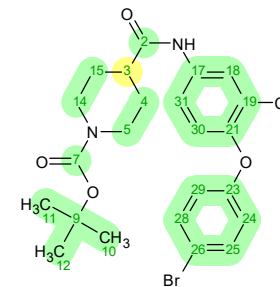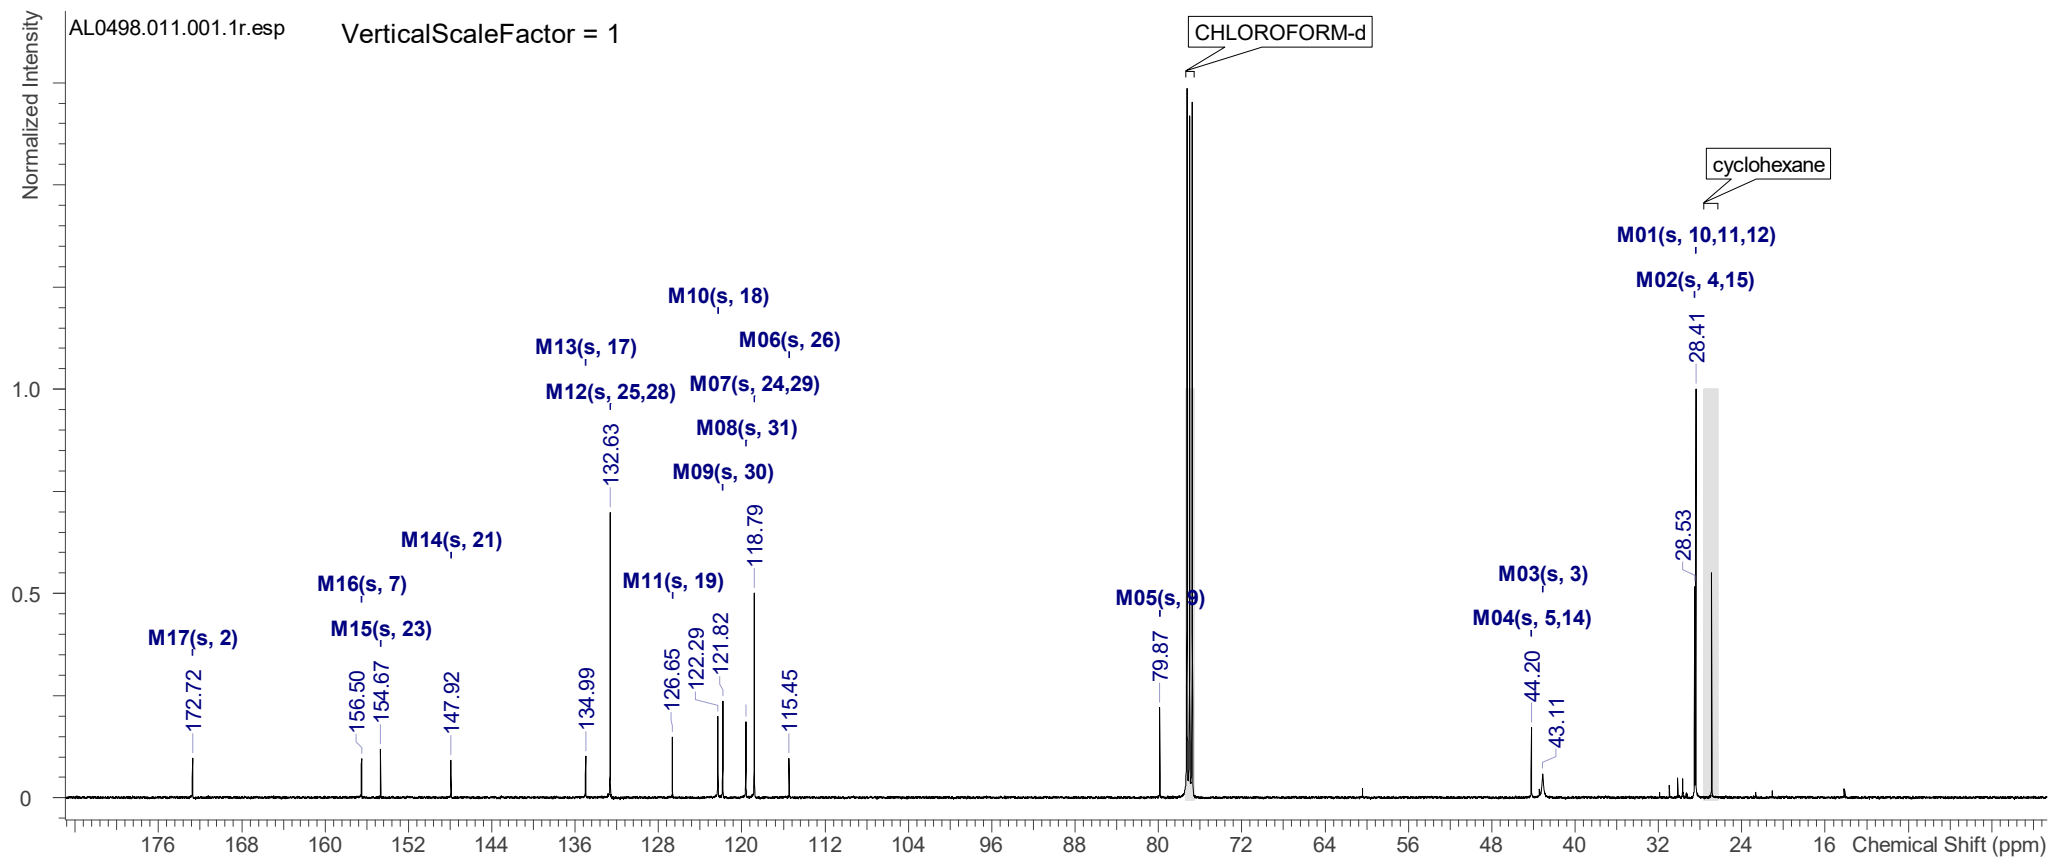

Compound 6h

7/19/2023 8:32:54 AM

|                         |                                        |                                       |
|-------------------------|----------------------------------------|---------------------------------------|
| <b>Number of Nuclei</b> | 26 H's / 26 H's (spectrum / structure) | <b>Multiplets Integrals Sum</b> 27.48 |
|-------------------------|----------------------------------------|---------------------------------------|

<sup>1</sup>H NMR (500 MHz, CHLOROFORM-*d*, ppm) δ= 7.77 (1 H, d, J = 2.29 Hz), 7.62 – 7.57 (2 H, m), 7.40 – 7.35 (2 H, m), 6.99 (1 H, d, J = 8.85 Hz), 6.70 – 6.66 (2 H, m), 4.20 (2 H, m), 2.80 (2 H, m), 2.40 (1 H, m), 1.90 (2 H, m), 1.75 (2 H, m), 1.48 (9 H, s);

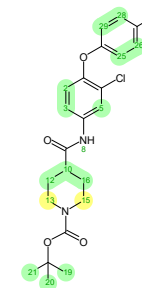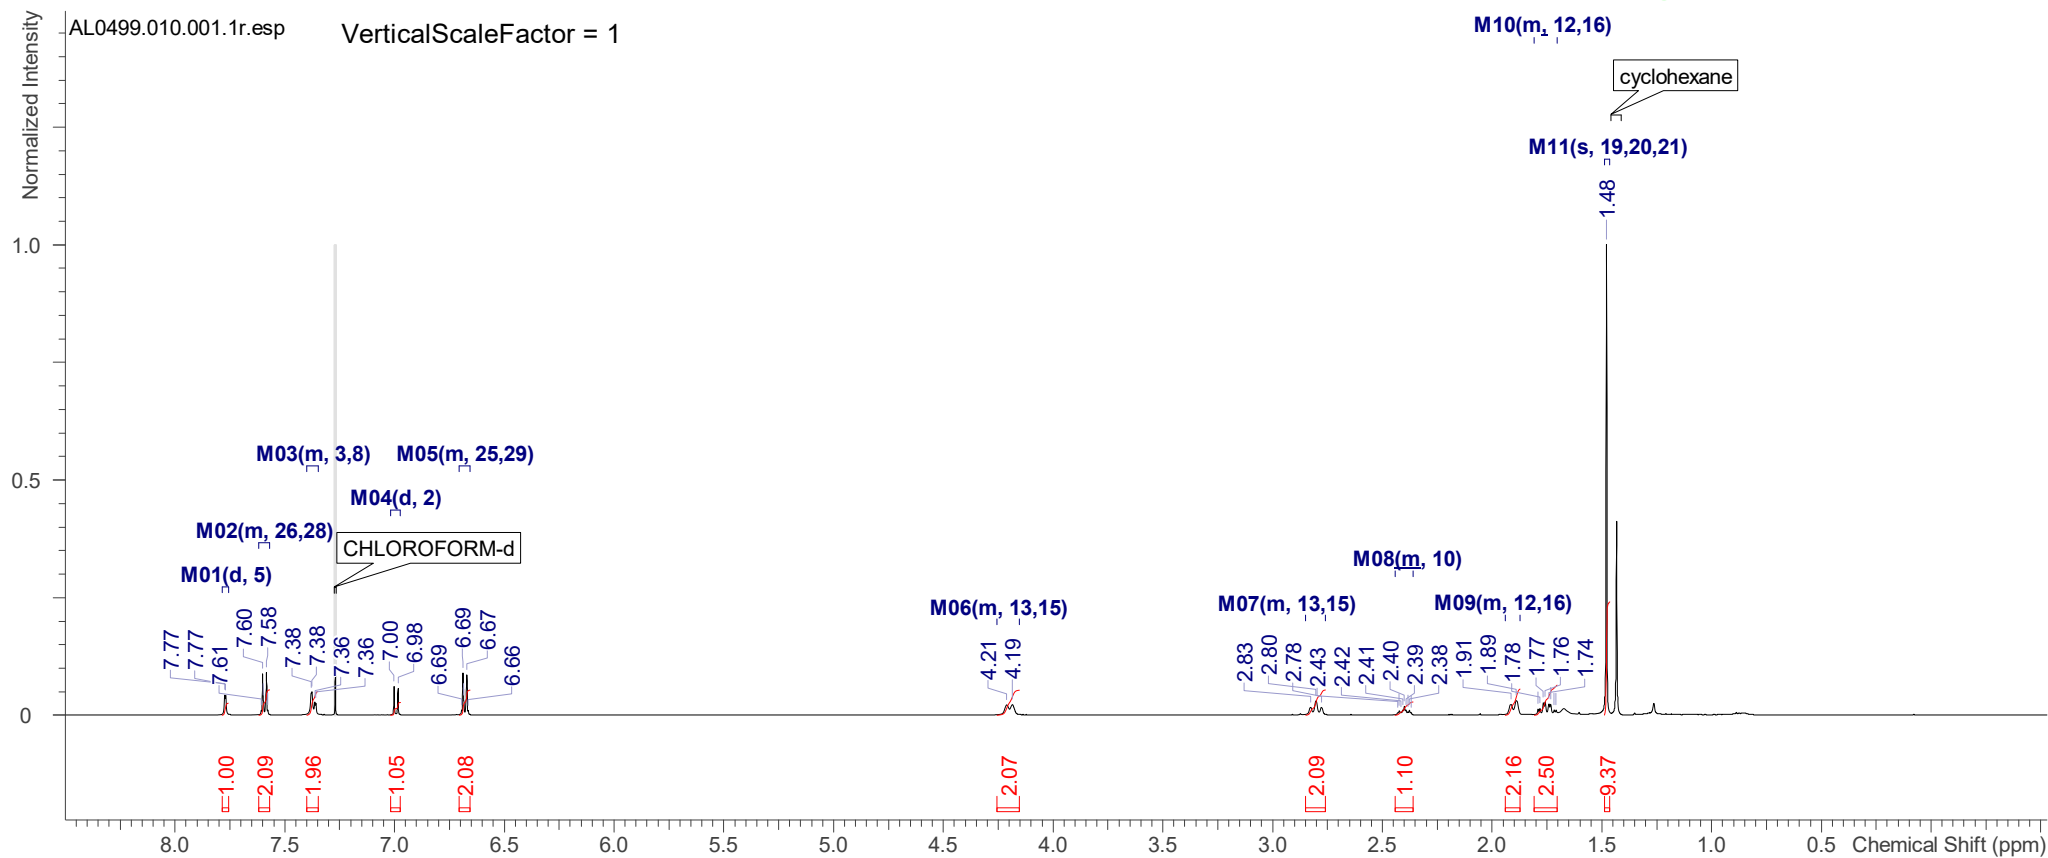

Compound 6h

7/19/2023 8:32:58 AM

|                  |                                        |                          |      |
|------------------|----------------------------------------|--------------------------|------|
| Number of Nuclei | 23 C's / 23 C's (spectrum / structure) | Multiplets Integrals Sum | 0.00 |
|------------------|----------------------------------------|--------------------------|------|

<sup>13</sup>C NMR (126 MHz, CHLOROFORM-d, ppm) δ= 172.7 (1 C, s), 157.4 (1 C, s), 154.7 (1 C, s), 147.8 (1 C, s), 138.6 (2 C, s), 135.0 (1 C, s), 126.8 (1 C, s), 122.3 (1 C, s), 121.9 (1 C, s), 119.6 (1 C, s), 119.2 (2 C, s), 85.7 (1 C, s), 79.9 (1 C, s), 44.2 (2 C, s), 43.1 (1 C, s), 28.5 (2 C, s), 28.4 (3 C, s)

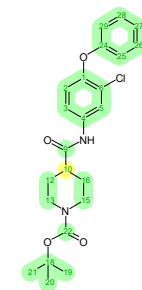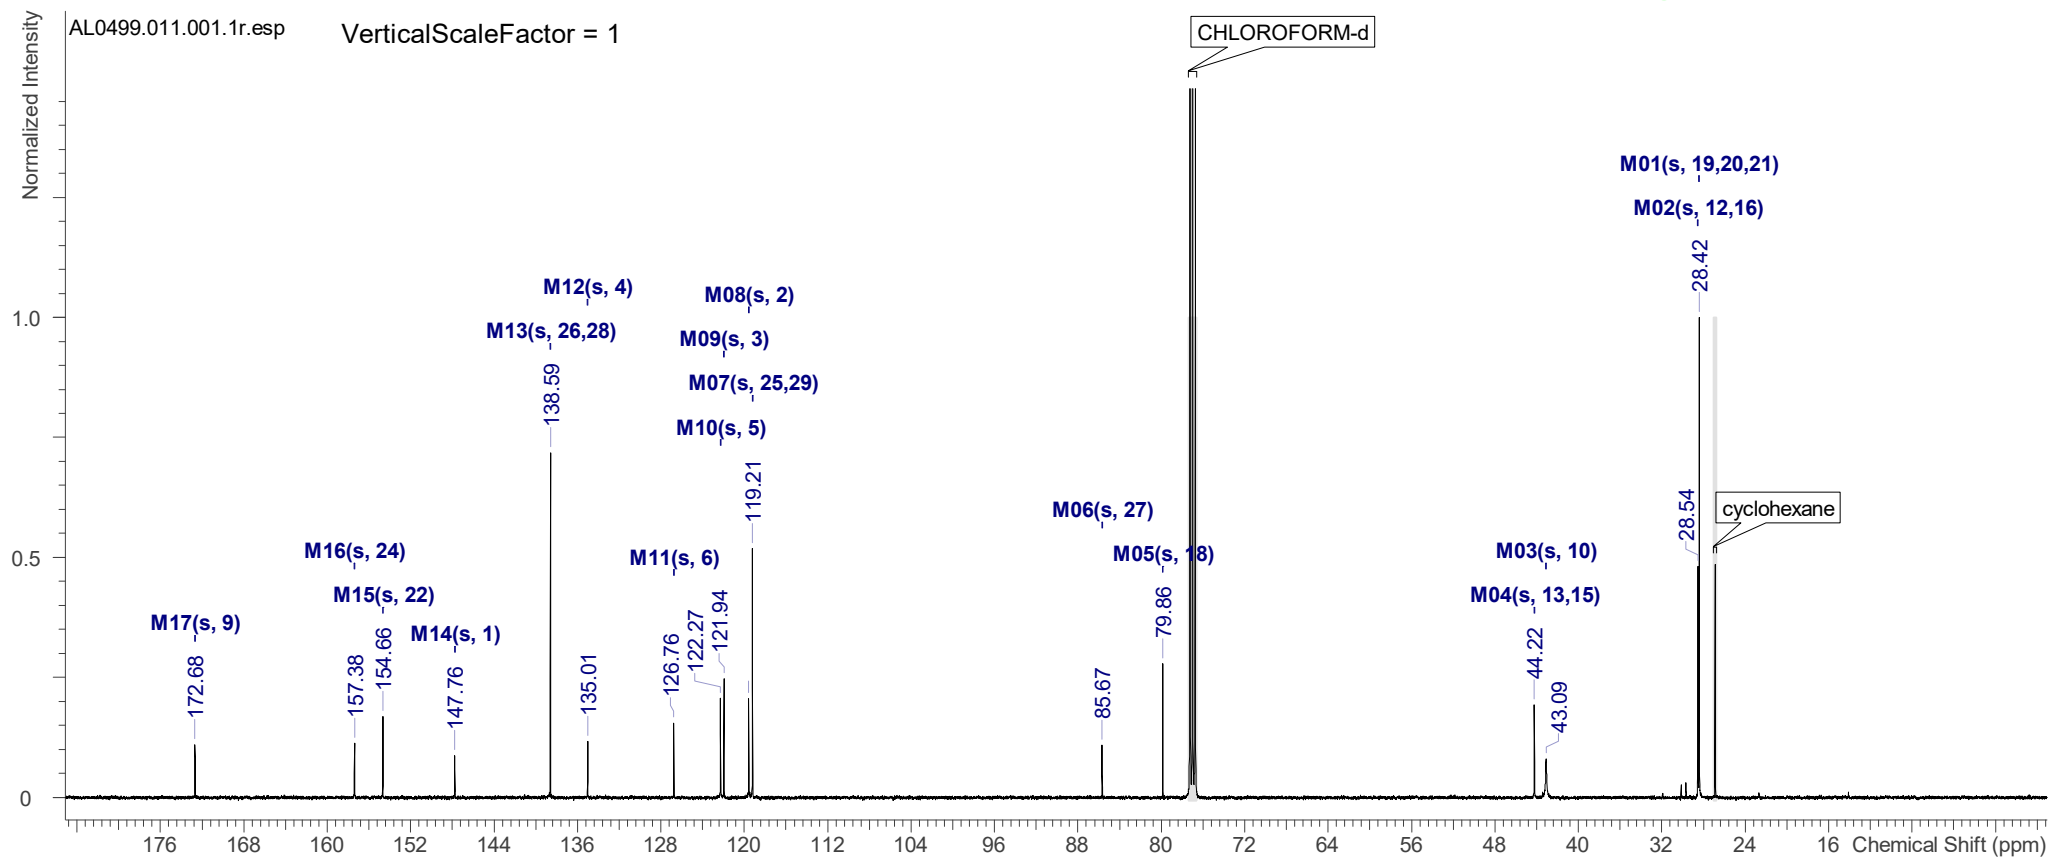

Compound 7a

1/27/2022 8:49:51 AM

Multiplets Integrals Sum 18.11 Number of Nuclei 17 H's / 19 H's (spectrum / structure)

$^1\text{H}$  NMR (500 MHz, METHANOL- $d_4$ , ppm)  $\delta$ = 7.89 (1 H, d,  $J$  = 2.44 Hz), 7.43 (1 H, dd,  $J$  = 8.77, 2.52 Hz), 7.31 (2 H, t,  $J$  = 7.86 Hz), 7.07 (1 H, t,  $J$  = 7.32 Hz), 6.99 (1 H, d,  $J$  = 8.85 Hz), 6.88 (2 H, d,  $J$  = 8.54 Hz), 3.31 – 3.27 (2 H, m), 2.86 (2 H, m), 2.62 (1 H, m), 1.99 – 1.94 (2 H, m), 1.90 – 1.80 (2 H, m);

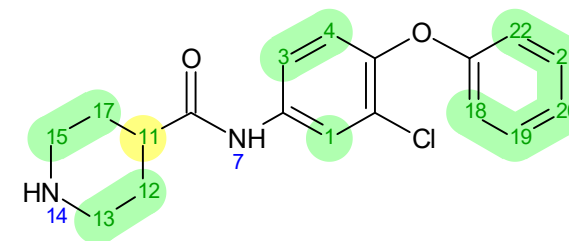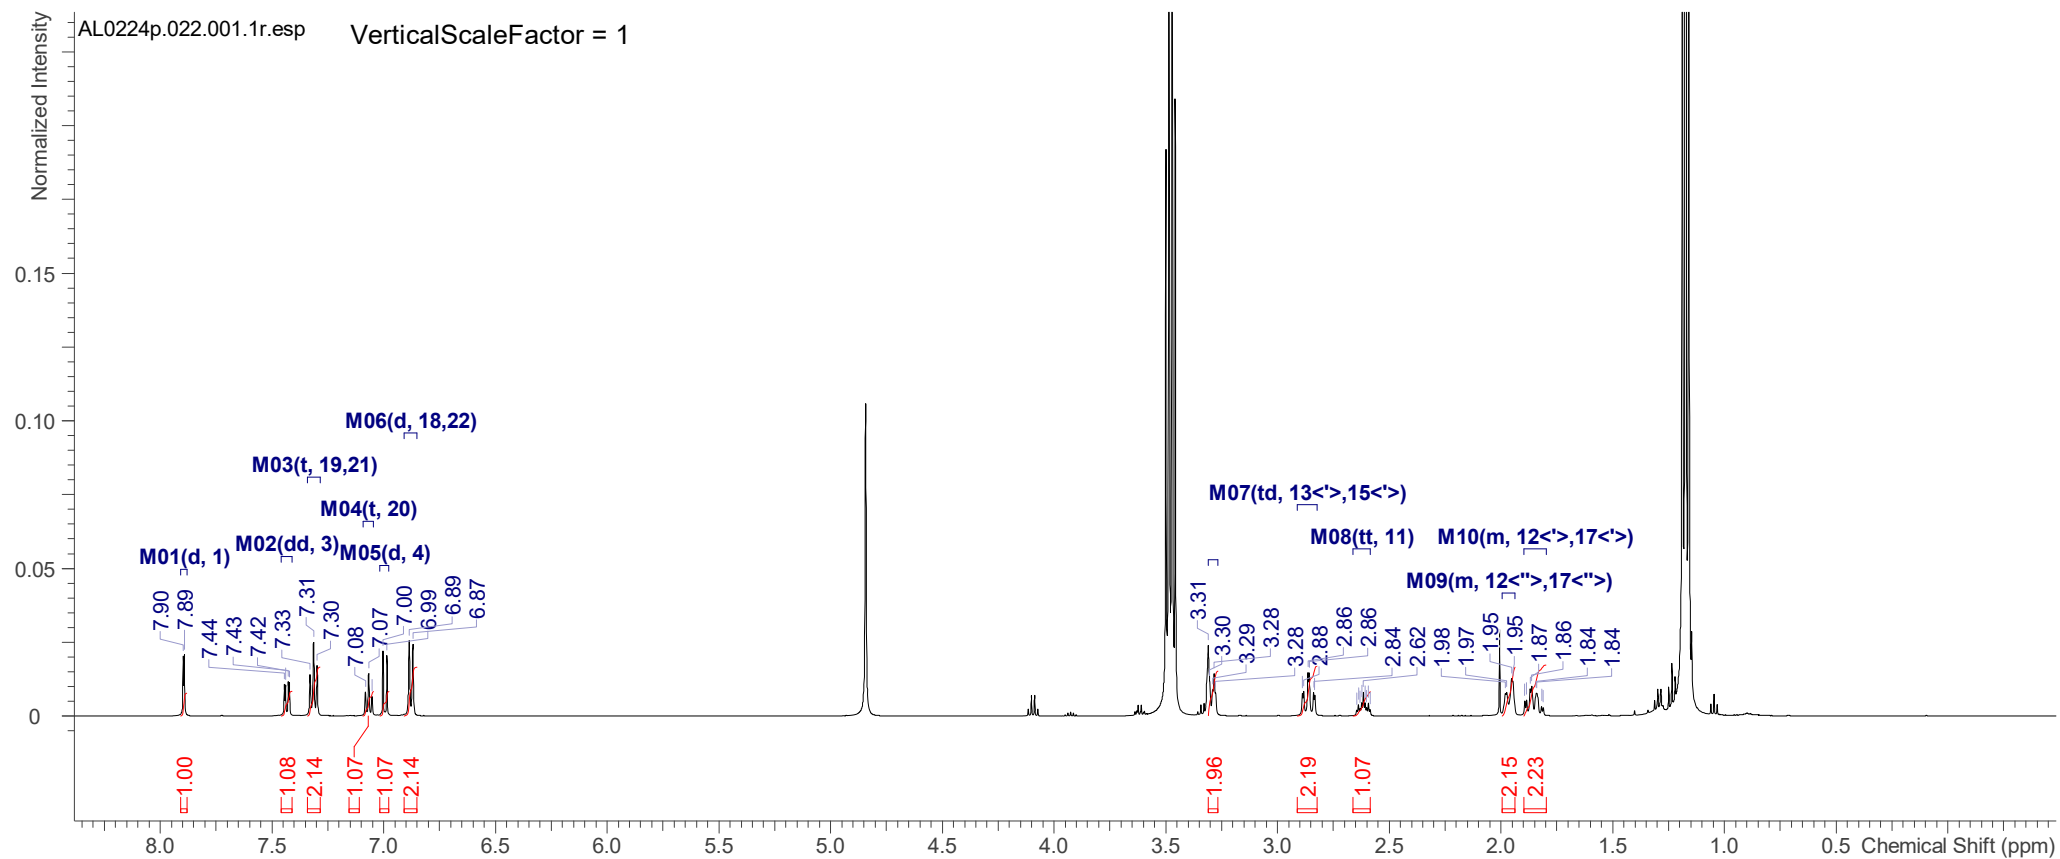

Compound 7a

1/27/2022 8:49:59 AM

|                         |                                        |                                       |
|-------------------------|----------------------------------------|---------------------------------------|
| <b>Number of Nuclei</b> | 18 C's / 18 C's (spectrum / structure) | <b>Multiplets Integrals Sum</b> 17.48 |
|-------------------------|----------------------------------------|---------------------------------------|

<sup>13</sup>C NMR (126 MHz, METHANOL-*d*<sub>4</sub>, ppm) δ= 175.3 (1 C, s), 159.0 (1 C, s), 149.5 (1 C, s), 137.3 (1 C, s), 131.0 (2 C, s), 127.3 (1 C, s), 124.2 (1 C, s), 123.3 (1 C, s), 122.9 (1 C, s), 121.0 (1 C, s), 118.2 (2 C, s), 45.4 (2 C, s), 43.5 (1 C, s), 28.6 (2 C, s).

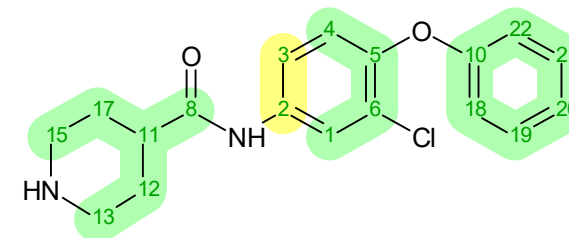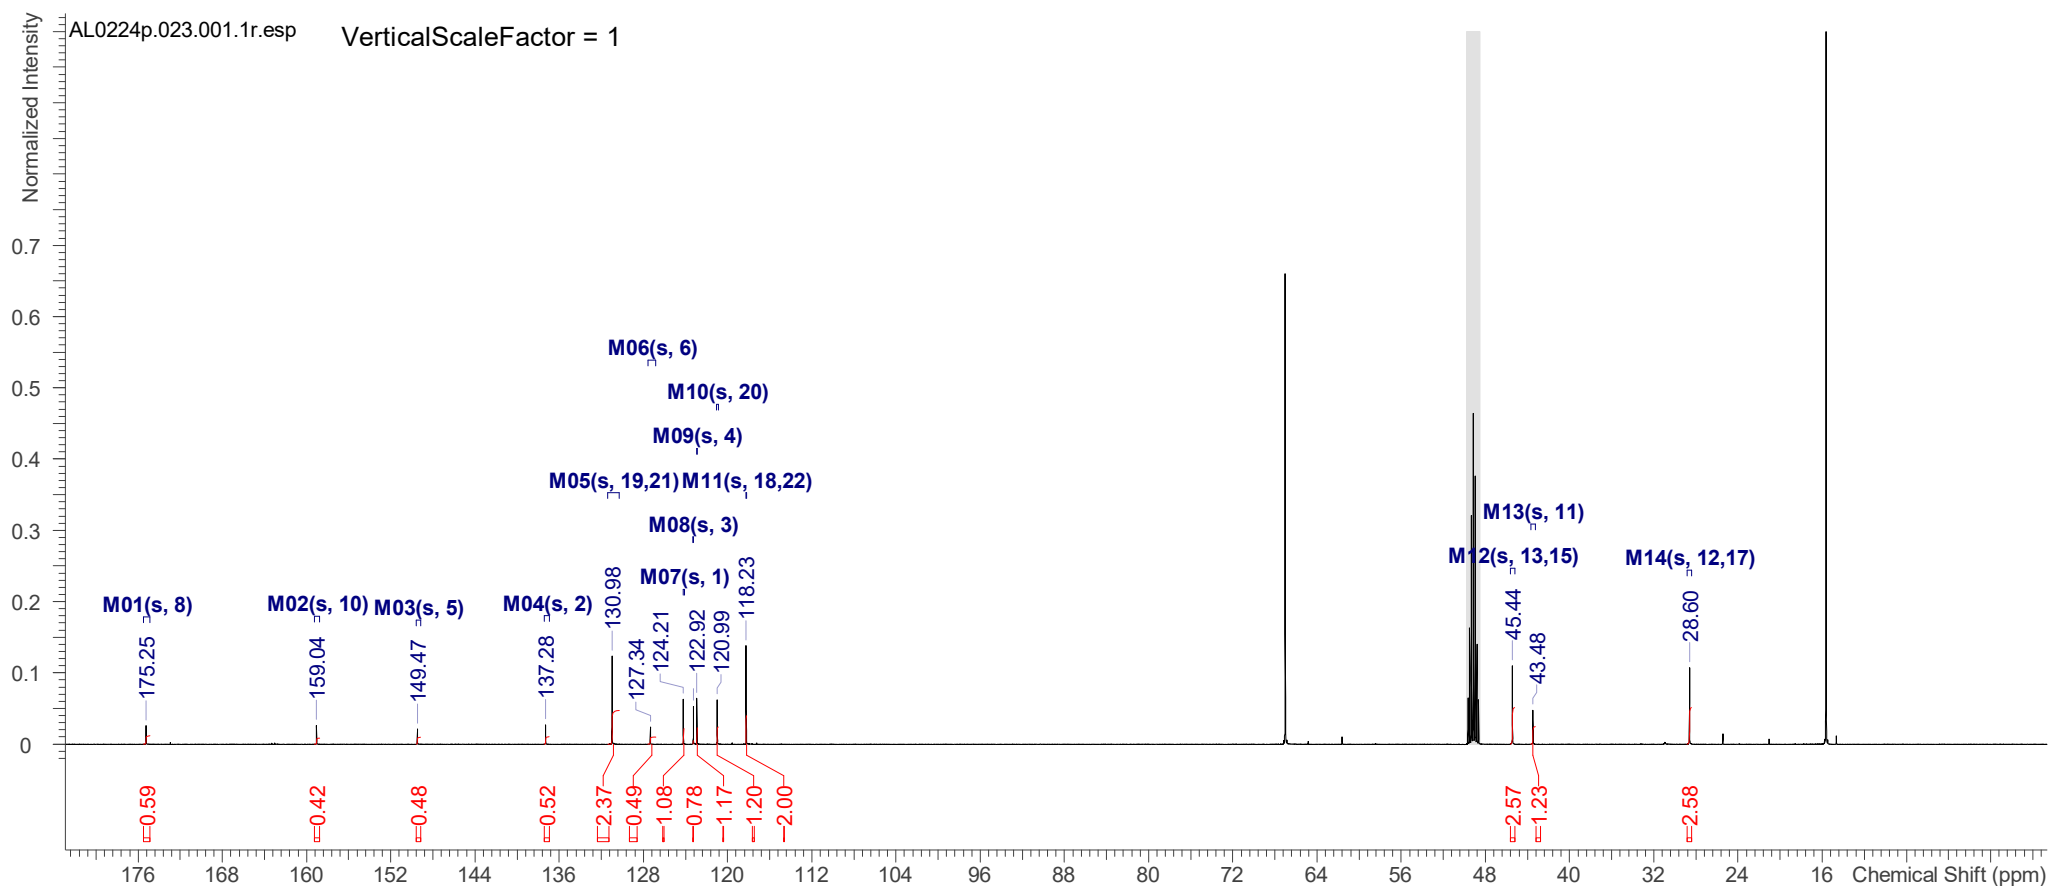

Compound 7b

12/10/2021 9:28:44 AM

<sup>1</sup>H NMR (500 MHz, DMSO-*d*<sub>6</sub>, ppm) δ= 10.19 (1 H, br s), 8.45 (1 H, br s), 7.63 (2 H, br d, J = 8.54 Hz), 7.35 (2 H, br t, J = 7.63 Hz), 7.08 (1 H, br t, J = 7.17 Hz), 6.96 (4 H, br dd, J = 14.80, 8.39 Hz), 3.24 (2 H, m), 2.80 (2 H, m), 2.61 (1 H, m), 1.95 – 1.72 (4 H, m);

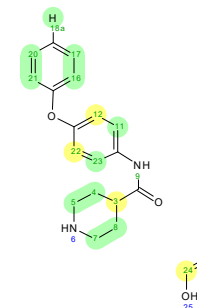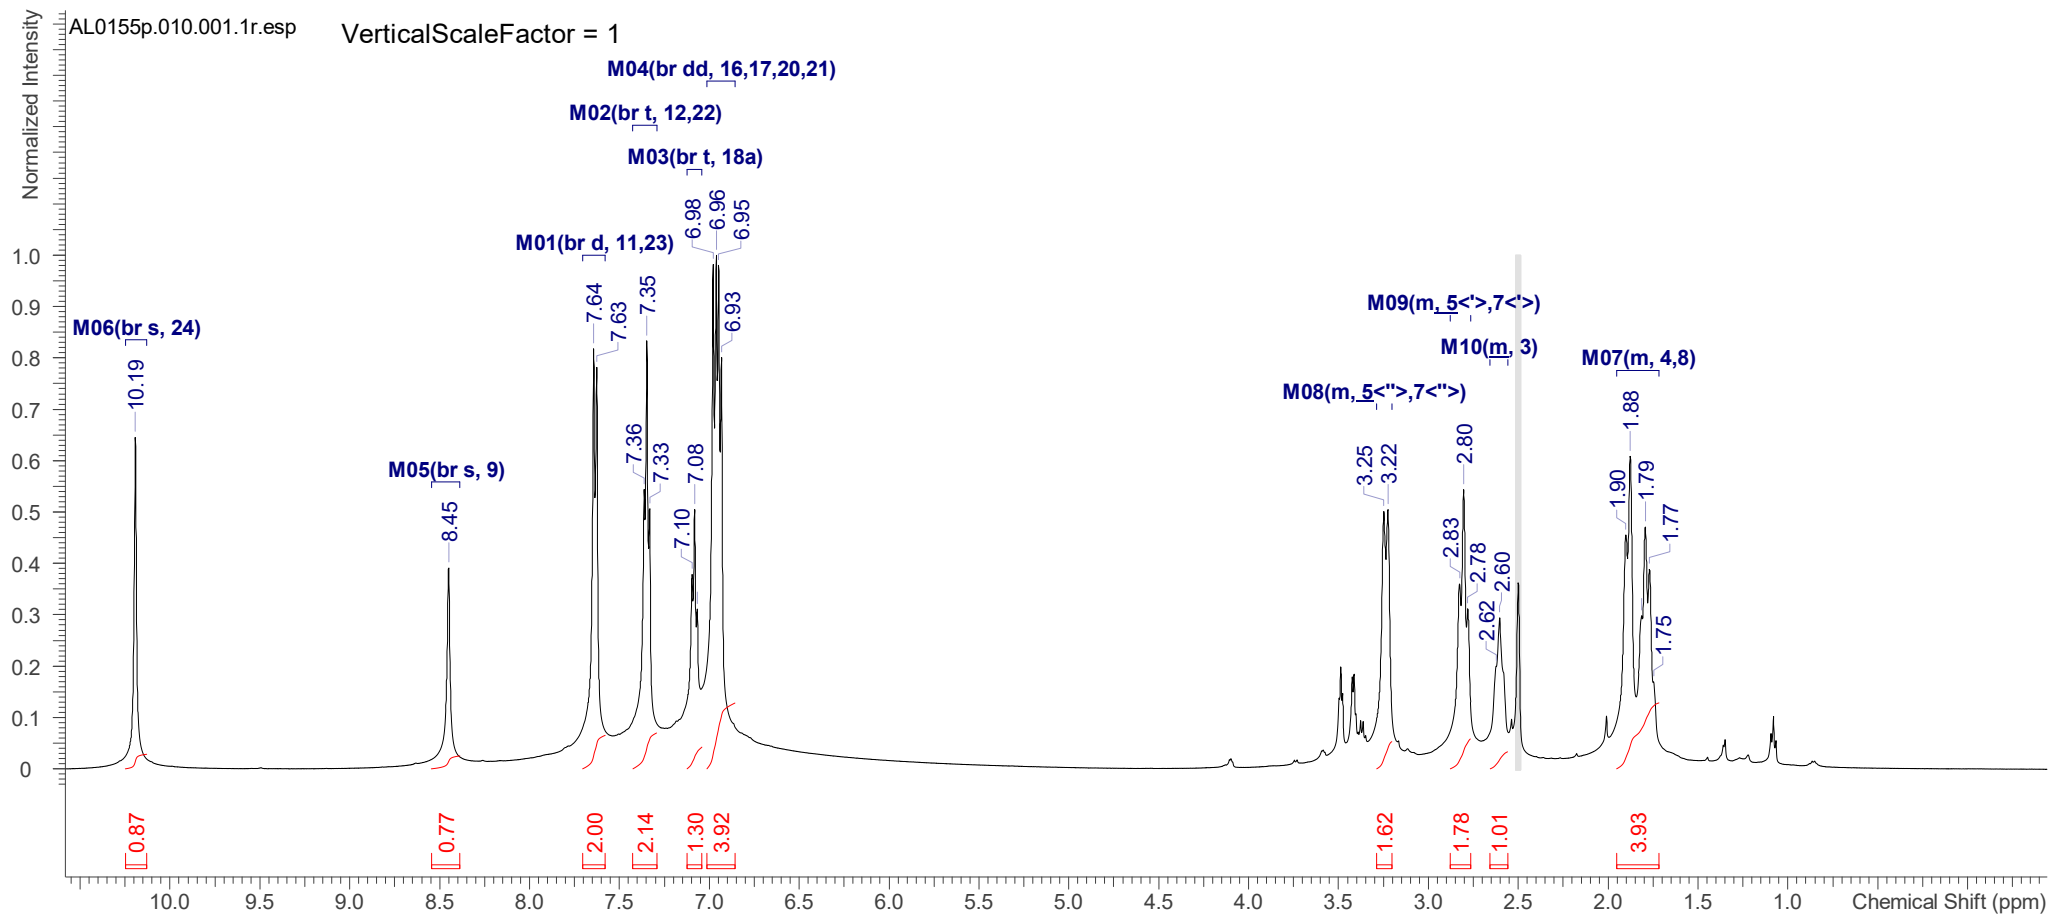

Compound 7b

12/10/2021 9:28:51 AM

<sup>13</sup>C NMR (126 MHz, DMSO-d<sub>6</sub>, ppm) δ= 172.3 (1 C, s), 166.2 (1 C, br s), 157.4 (1 C, s), 151.5 (1 C, s), 135.2 (1 C, s), 129.9 (2 C, s), 122.9 (1 C, s), 120.8 (2 C, s), 119.5 (2 C, s), 117.7 (2 C, s), 42.7 (2 C, s), 40.7 (1 C, br s), 25.9 (2 C, s).

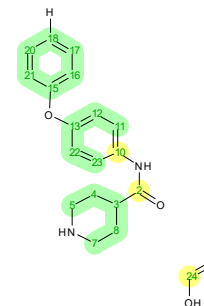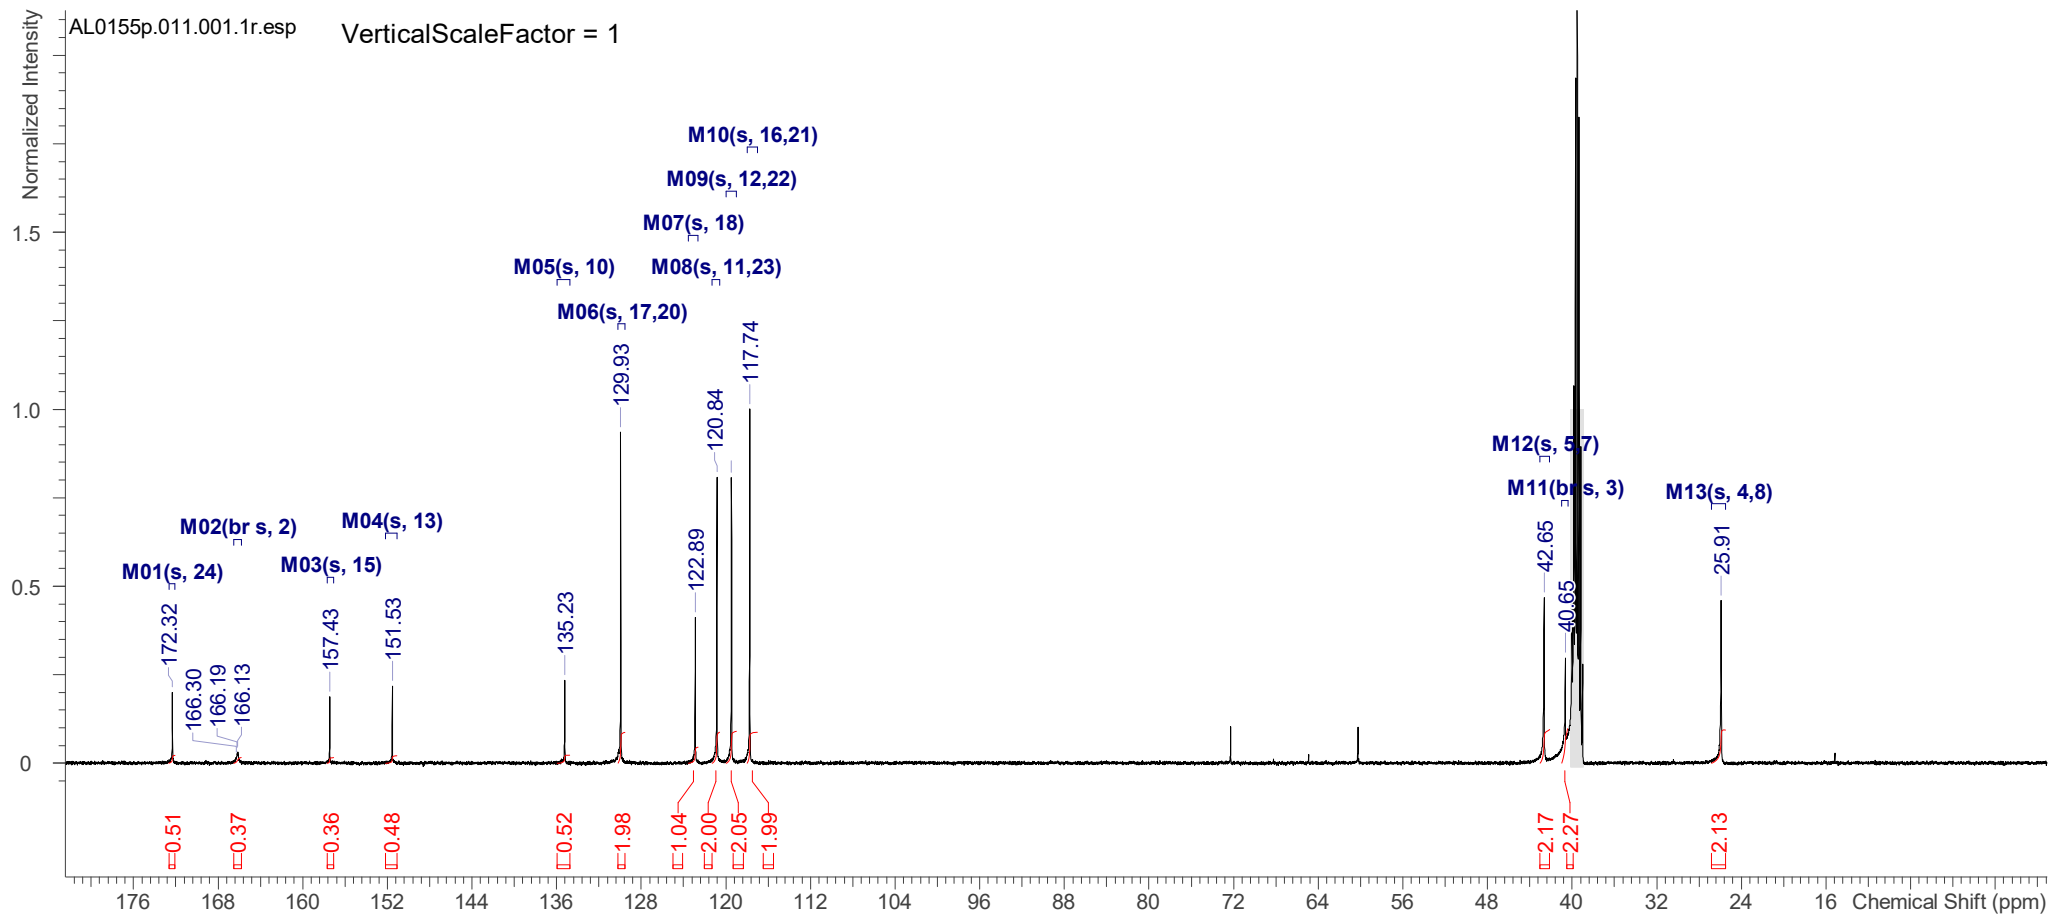

Compound 7c

4/9/2022 2:27:53 PM

|                         |                                        |                                       |
|-------------------------|----------------------------------------|---------------------------------------|
| <b>Number of Nuclei</b> | 16 H's / 18 H's (spectrum / structure) | <b>Multiplets Integrals Sum</b> 18.42 |
|-------------------------|----------------------------------------|---------------------------------------|

<sup>1</sup>H NMR (500 MHz, METHANOL-d<sub>4</sub>, ppm) δ= 8.06 (1 H, d, J = 2.59 Hz), 7.73 (1 H, dd, J = 9.16, 2.59 Hz), 7.43 – 7.39 (2 H, m), 7.08 – 7.04 (2 H, m), 6.99 (1 H, d, J = 9.00 Hz), 3.14 (2 H, m), 2.68 (2 H, m), 2.52 (1 H, m), 1.85 (2 H, m), 1.78 – 1.68 (2 H, m);

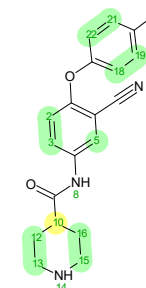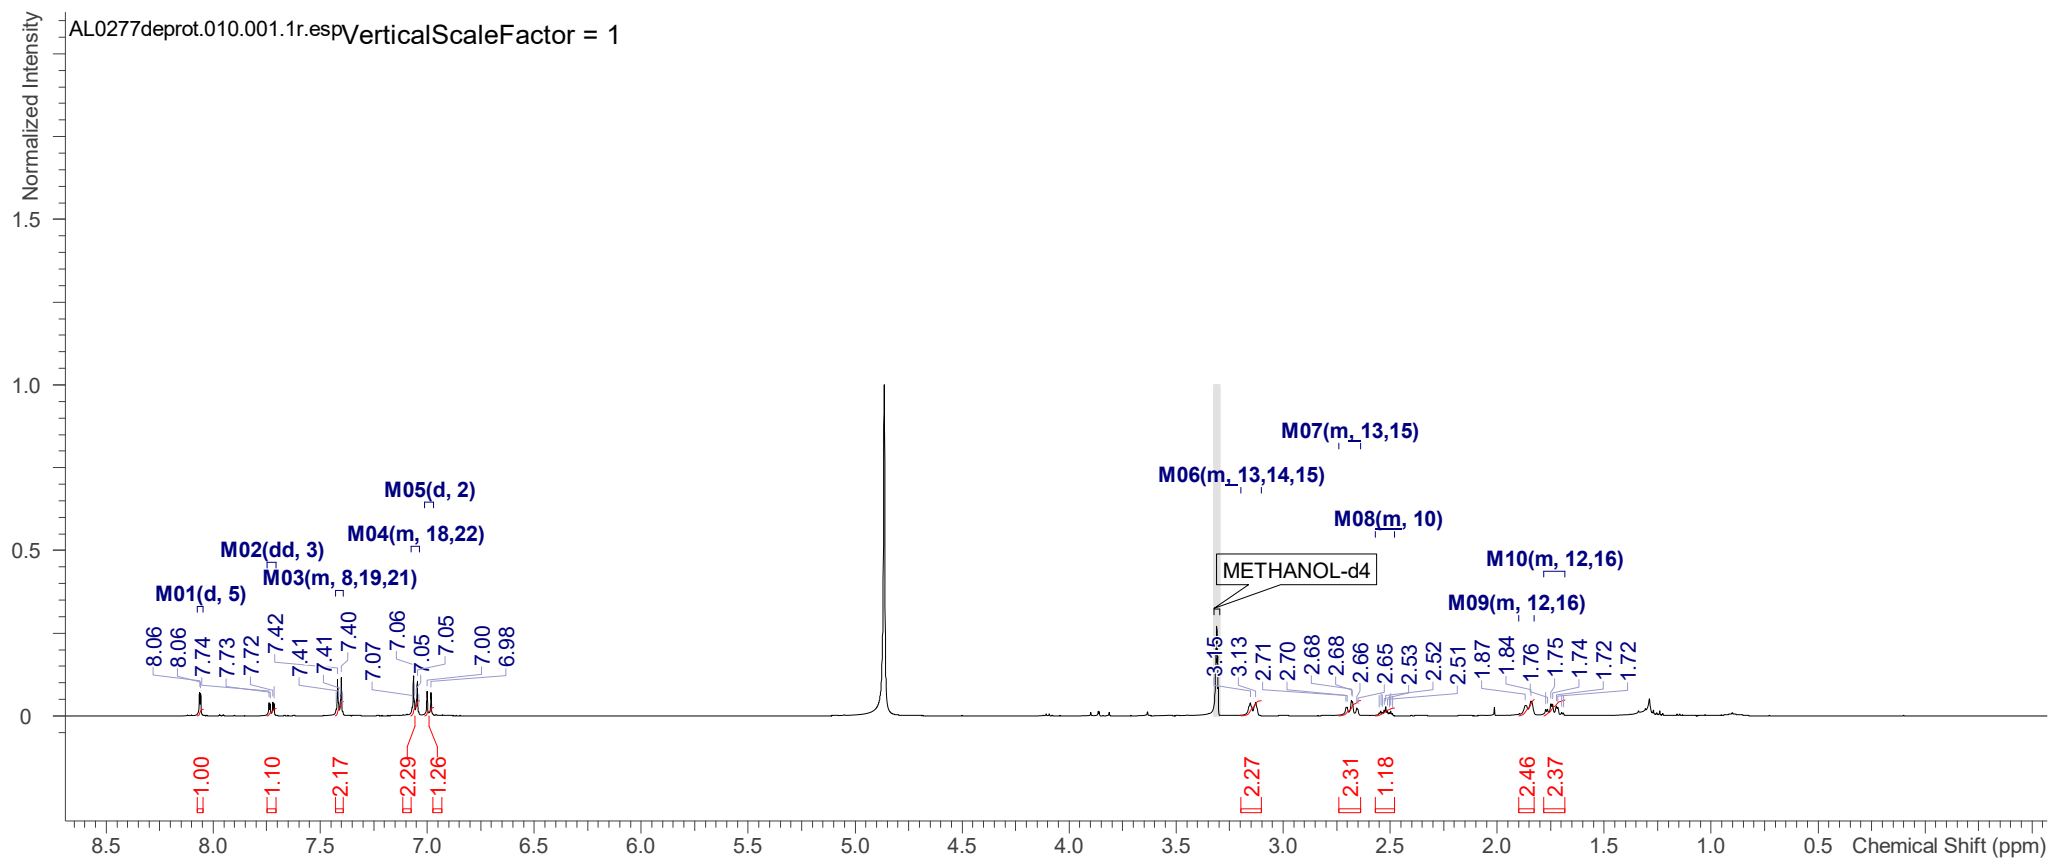

Compound 7c

4/9/2022 2:27:56 PM

|                         |                                        |                                      |
|-------------------------|----------------------------------------|--------------------------------------|
| <b>Number of Nuclei</b> | 19 C's / 19 C's (spectrum / structure) | <b>Multiplets Integrals Sum</b> 0.00 |
|-------------------------|----------------------------------------|--------------------------------------|

<sup>13</sup>C NMR (126 MHz, METHANOL-d<sub>4</sub>, ppm) δ= 176.5 (1 C, s), 156.6 (1 C, s), 156.1 (1 C, s), 136.8 (1 C, s), 131.6 (2 C, s), 131.1 (1 C, s), 127.8 (1 C, s), 126.0 (1 C, s), 121.8 (2 C, s), 120.6 (1 C, s), 116.6 (1 C, s), 105.8 (1 C, s), 46.4 (2 C, s), 45.0 (1 C, s), 30.1 (2 C, s).

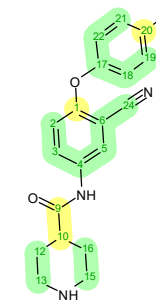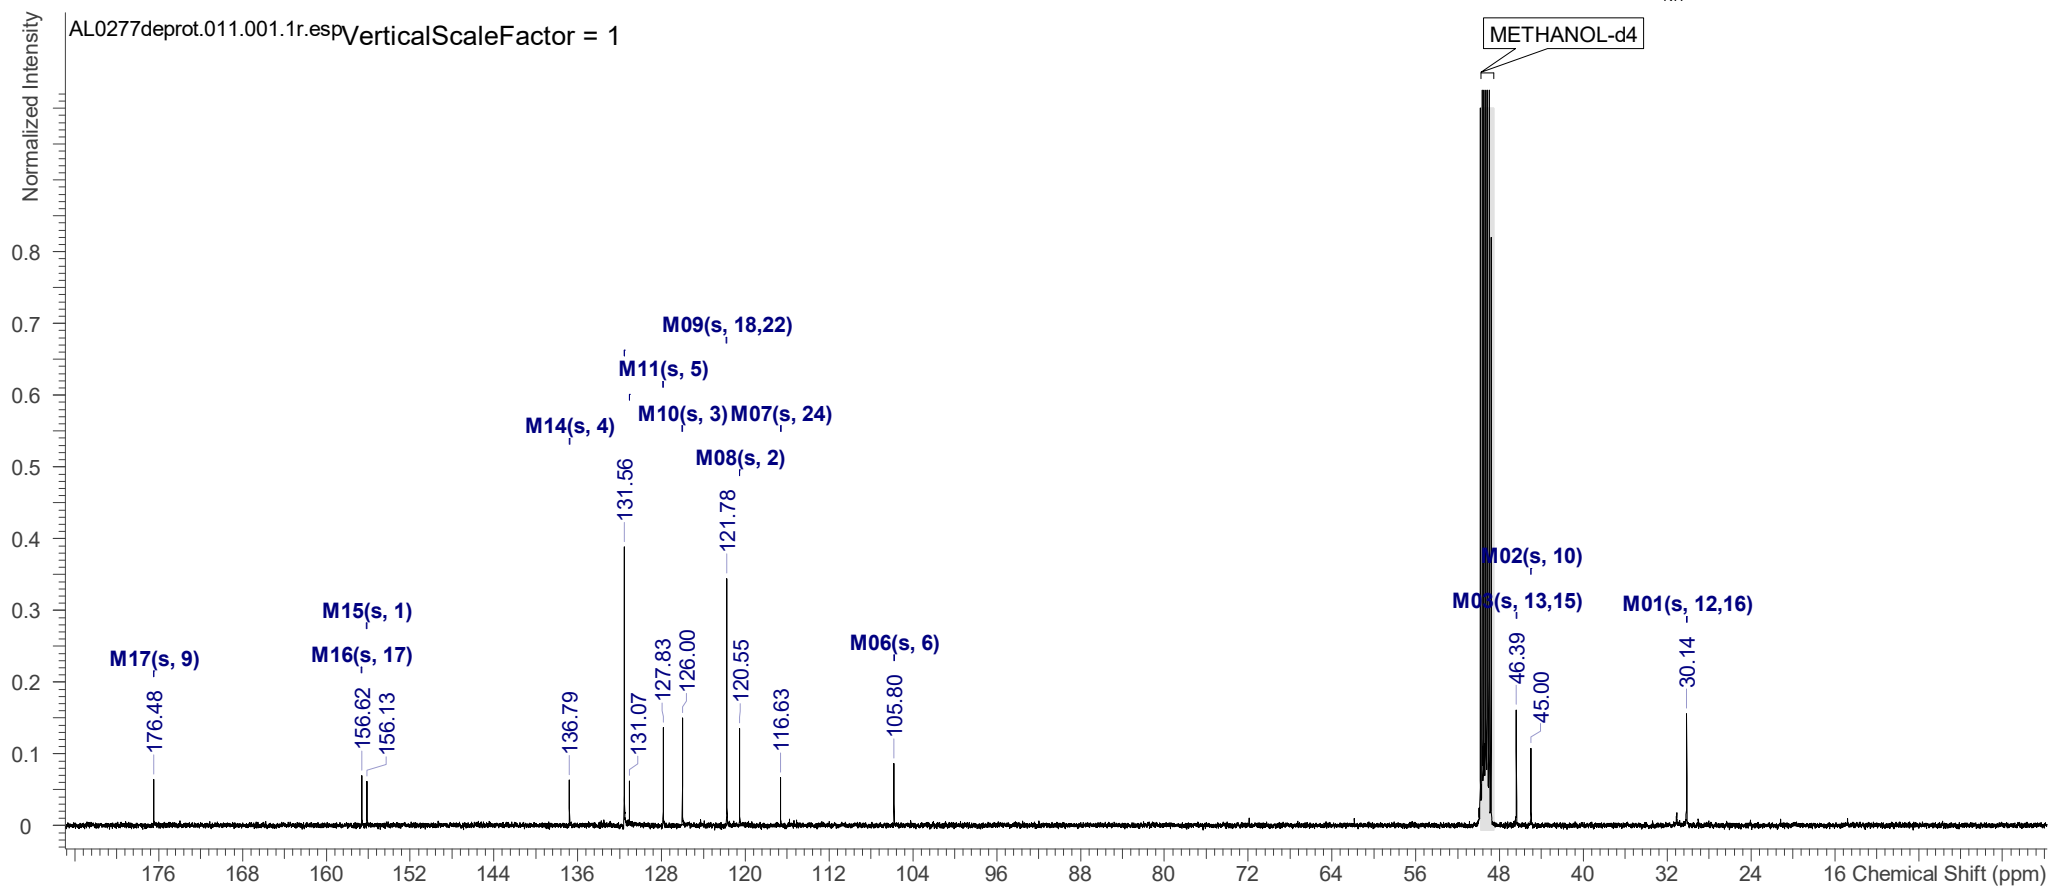

## Compound 7d

4/29/2022 9:05:07 AM

Number of Nuclei 17 H's / 20 H's (spectrum / structure)

Multiplets Integrals Sum 18.12

$^1\text{H}$  NMR (500 MHz, METHANOL- $d_4$ , ppm)  $\delta$ = 8.53 (1 H, br s), 8.17 (1 H, d,  $J$  = 2.59 Hz), 7.82 (1 H, dd,  $J$  = 9.00, 2.59 Hz), 7.80 – 7.76 (2 H, m), 7.21 (1 H, d,  $J$  = 9.00 Hz), 7.16 (2 H, d,  $J$  = 7.86 Hz), 3.53 – 3.46 (2 H, m), 3.08 (2 H, m), 2.74 (1 H, m), 2.15 – 2.07 (2 H, m), 2.06 – 1.93 (2 H, m);

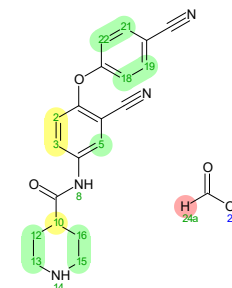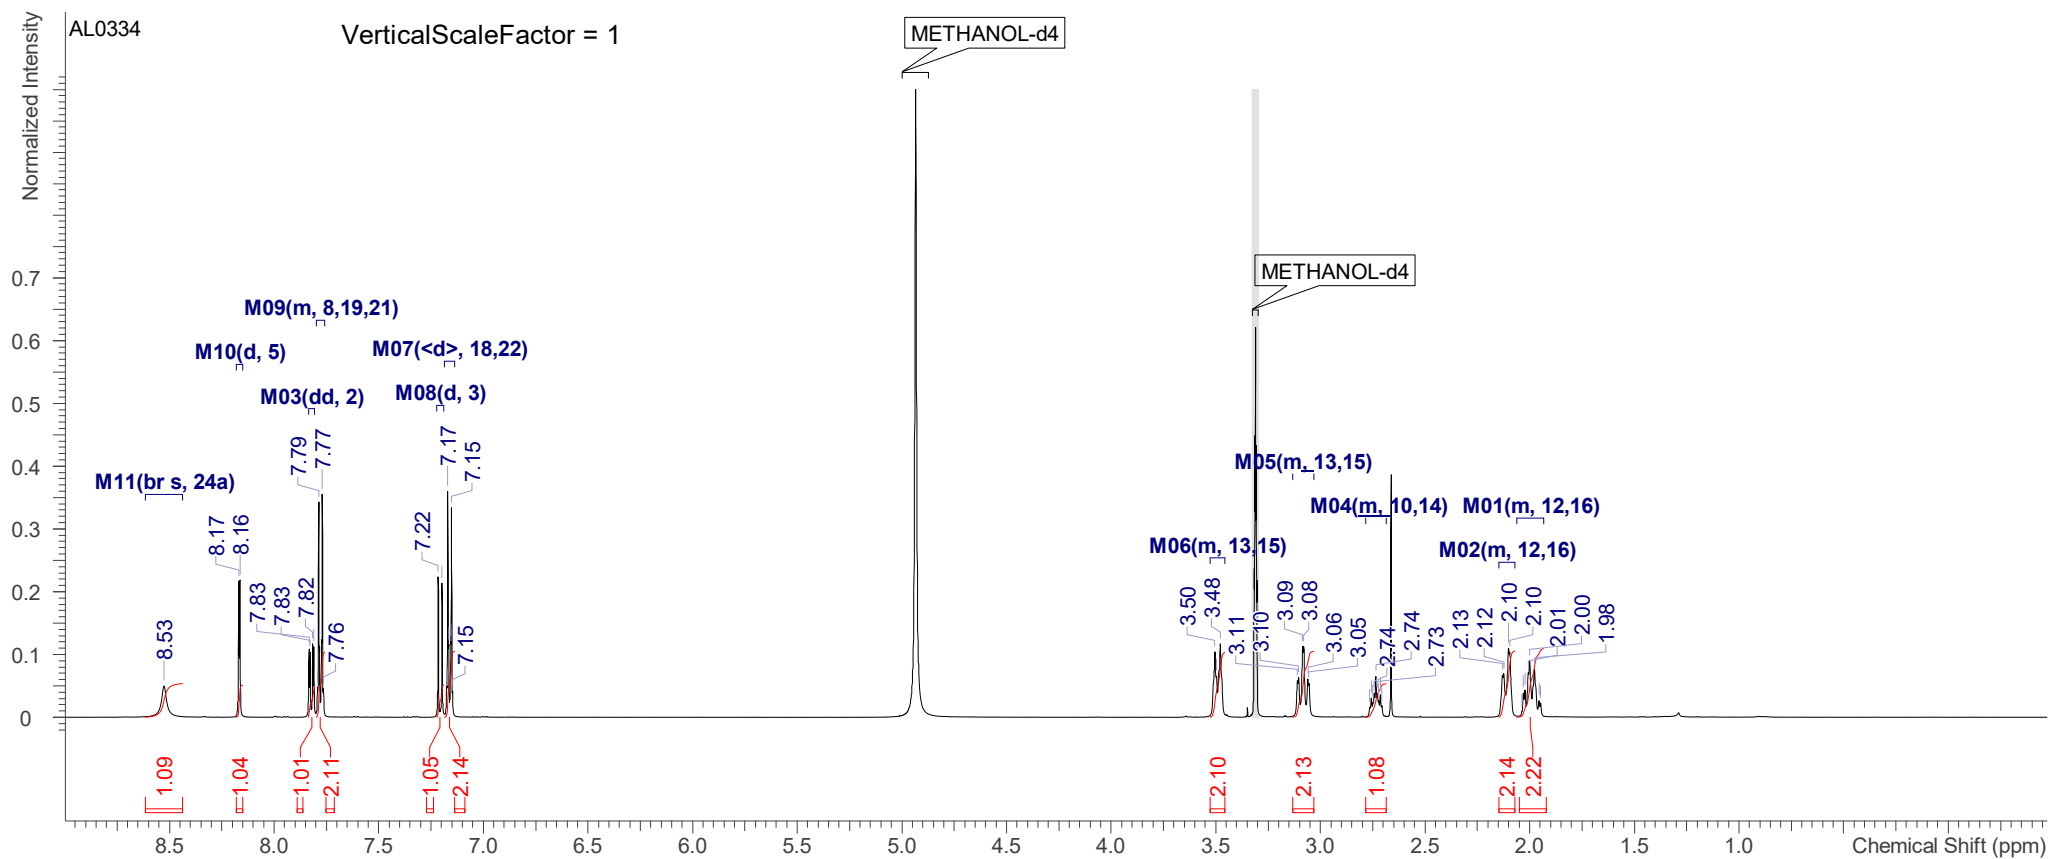

AL0334

Compound 7d

4/29/2022 9:05:11 AM

|                  |                                        |                          |      |
|------------------|----------------------------------------|--------------------------|------|
| Number of Nuclei | 21 C's / 21 C's (spectrum / structure) | Multiplets Integrals Sum | 0.00 |
|------------------|----------------------------------------|--------------------------|------|

<sup>13</sup>C NMR (126 MHz, METHANOL-d<sub>4</sub>, ppm) δ= 174.5 (1 C, s), 170.1 (1 C, s), 161.9 (1 C, s), 153.9 (1 C, s), 137.7 (1 C, s), 135.9 (2 C, s), 127.6 (1 C, s), 125.8 (1 C, s), 122.7 (1 C, s), 119.6 (1 C, s), 119.5 (2 C, s), 116.1 (1 C, s), 108.6 (1 C, s), 107.1 (1 C, s), 44.3 (2 C, s), 41.7 (1 C, s), 26.7 (2 C, s).

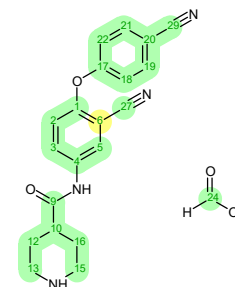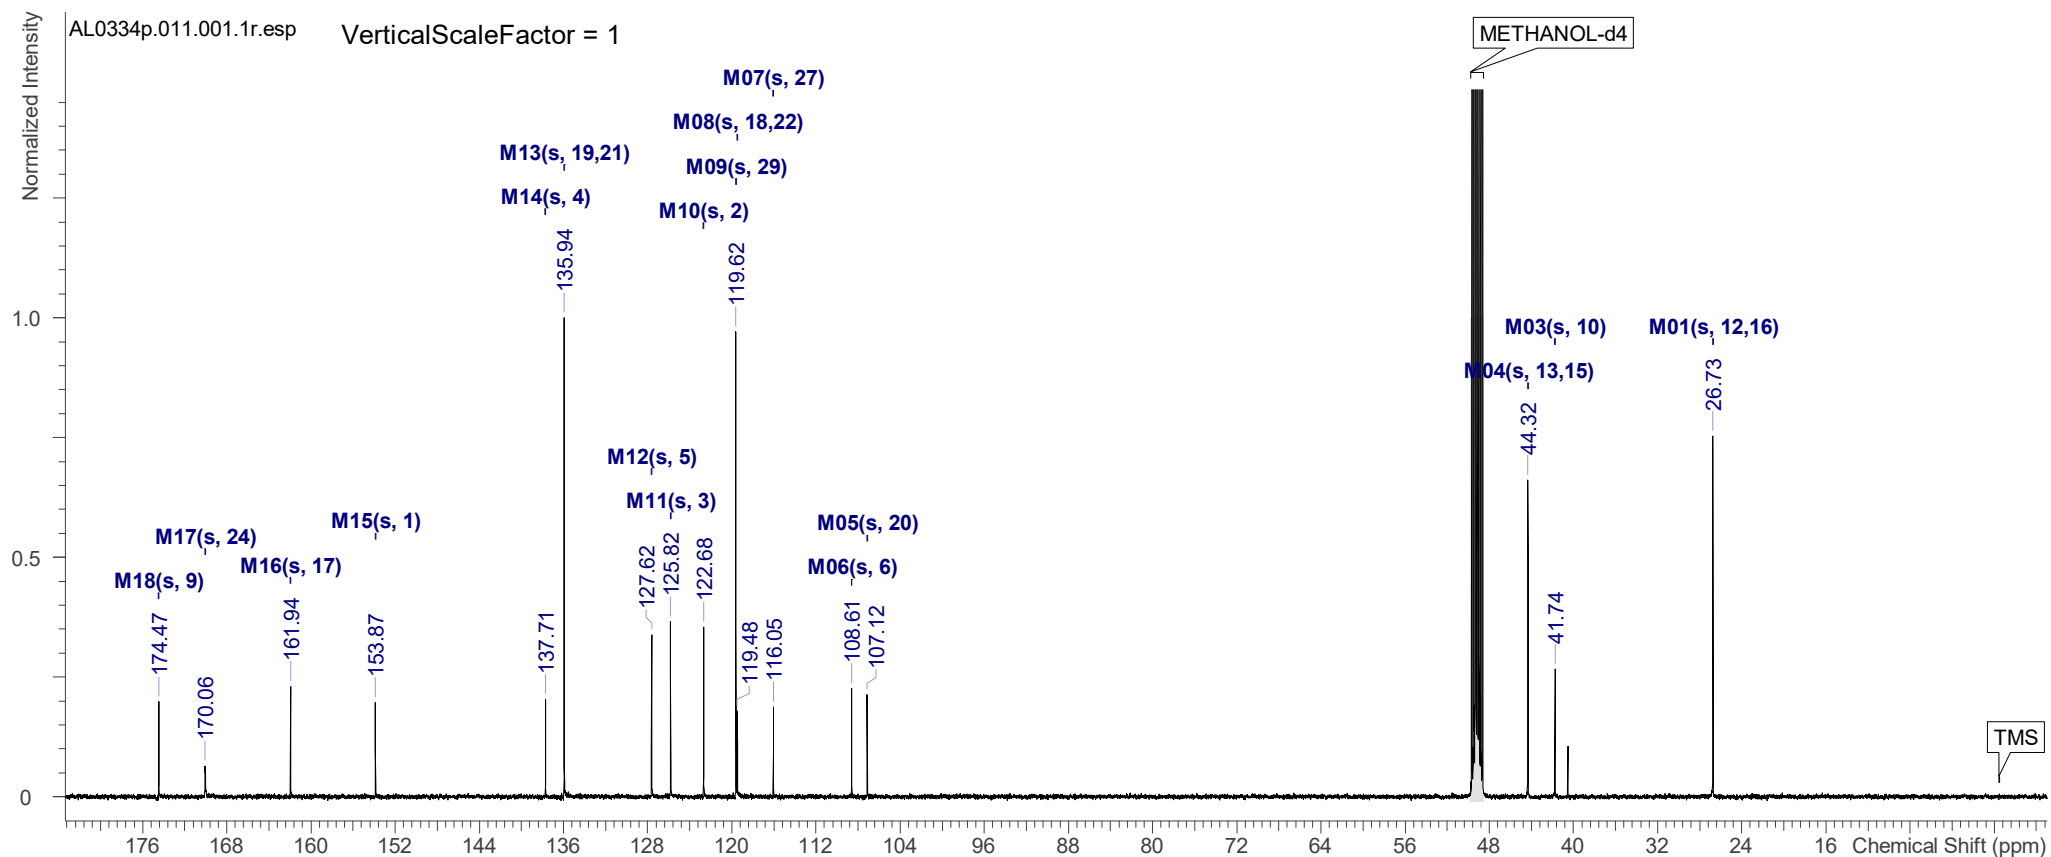

Compound 7e

4/2/2024 10:02:03 AM

|                         |                                        |                                 |       |
|-------------------------|----------------------------------------|---------------------------------|-------|
| <b>Number of Nuclei</b> | 16 H's / 18 H's (spectrum / structure) | <b>Multiplets Integrals Sum</b> | 16.42 |
|-------------------------|----------------------------------------|---------------------------------|-------|

<sup>1</sup>H NMR (500 MHz, METHANOL-d<sub>4</sub>, ppm) δ= 7.71 (1 H, dd, J = 12.89, 2.21 Hz), 7.27 (1 H, br d, J = 8.70 Hz), 7.05 (3 H, td, J = 8.77, 4.43 Hz), 6.94 – 6.88 (2 H, m), 3.49 (2 H, m), 3.11 (2 H, m), 2.80 – 2.74 (1 H, m), 2.11 (2 H, m), 2.06 – 1.91 (2 H, m);

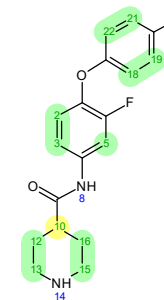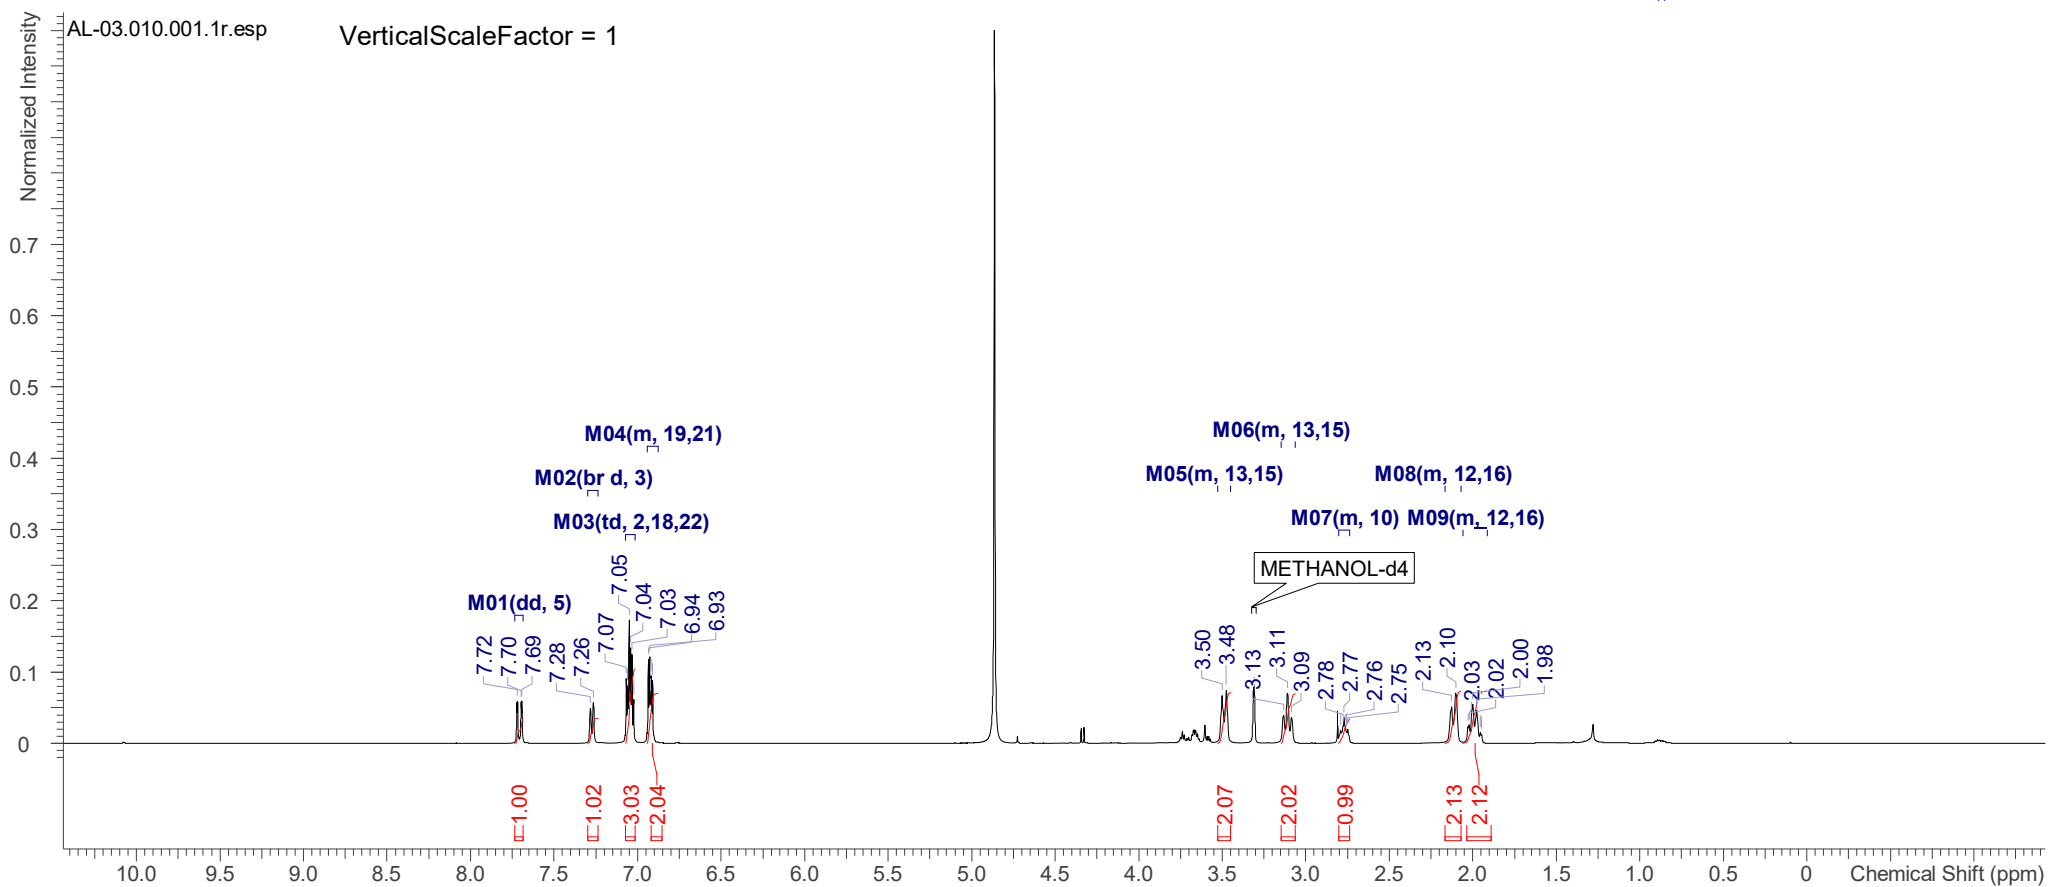

Compound 7e

4/2/2024 10:02:07 AM

|                  |                                        |                          |      |
|------------------|----------------------------------------|--------------------------|------|
| Number of Nuclei | 18 C's / 18 C's (spectrum / structure) | Multiplets Integrals Sum | 0.00 |
|------------------|----------------------------------------|--------------------------|------|

<sup>13</sup>C NMR (126 MHz, METHANOL-d<sub>4</sub>, ppm) δ= 26.7 (2 C, s), 41.7 (1 C, s), 44.4 (2 C, s), 110.3 (1 C, d, J = 22.98 Hz), 117.3 (2 C, d, J = 23.90 Hz), 117.4 (1 C, br d, J = 3.68 Hz), 119.4 (1 C, d, J = 8.27 Hz), 123.3 (2 C, d, J = 1.84 Hz), 137.3 (1 C, d, J = 9.19 Hz), 141.1 (1 C, d, J = 11.95 Hz), 155.3 (1 C, d, J = 246.35 Hz), 155.4 (1 C, d, J = 1.84 Hz), 160.1 (1 C, d, J = 239.91 Hz), 174.3 (1 C, s);

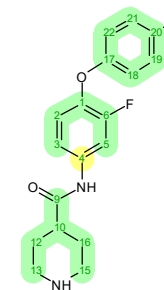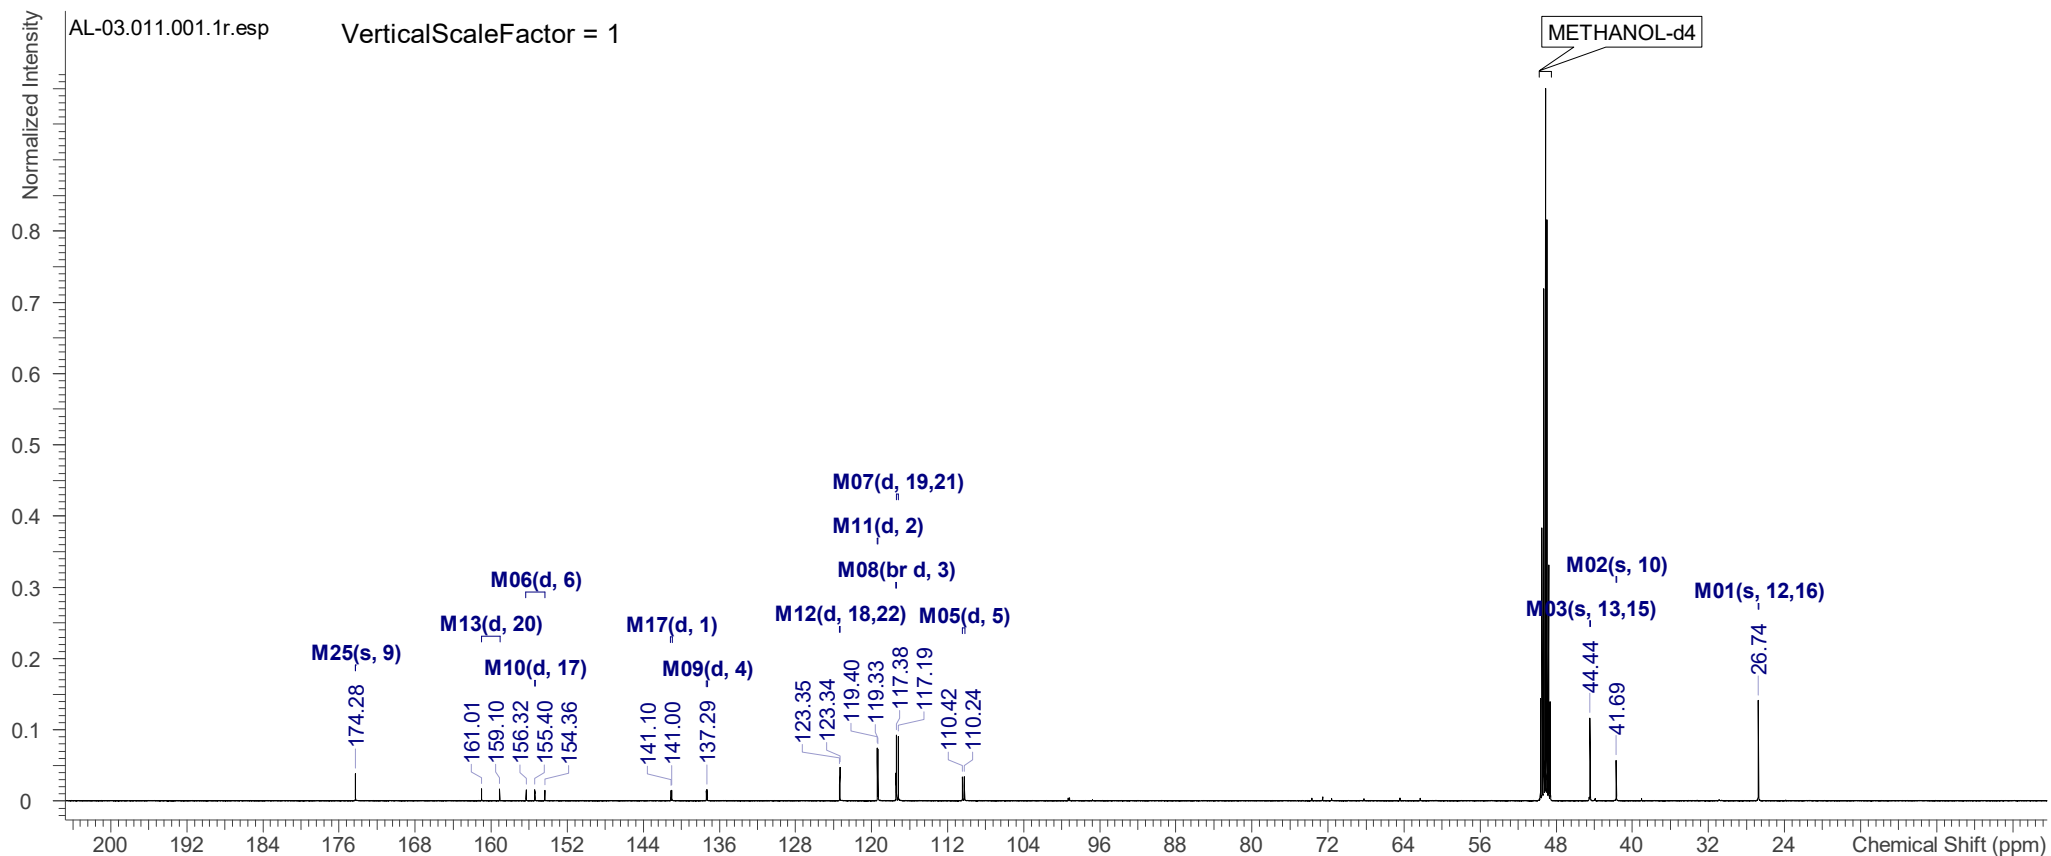

Compound 7e

4/2/2024 10:02:11 AM

|                  |                                      |                          |      |
|------------------|--------------------------------------|--------------------------|------|
| Number of Nuclei | 2 F's / 2 F's (spectrum / structure) | Multiplets Integrals Sum | 2.59 |
|------------------|--------------------------------------|--------------------------|------|

$^{19}\text{F}$  NMR (470 MHz, METHANOL- $d_4$ , ppm)  $\delta = -130.9$  (1 F, br dd,  $J = 12.14, 8.67$  Hz),  $-123.2$  –  $-122.8$  (1 F, m).

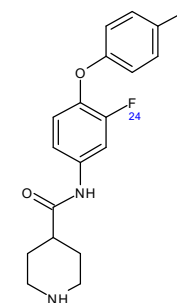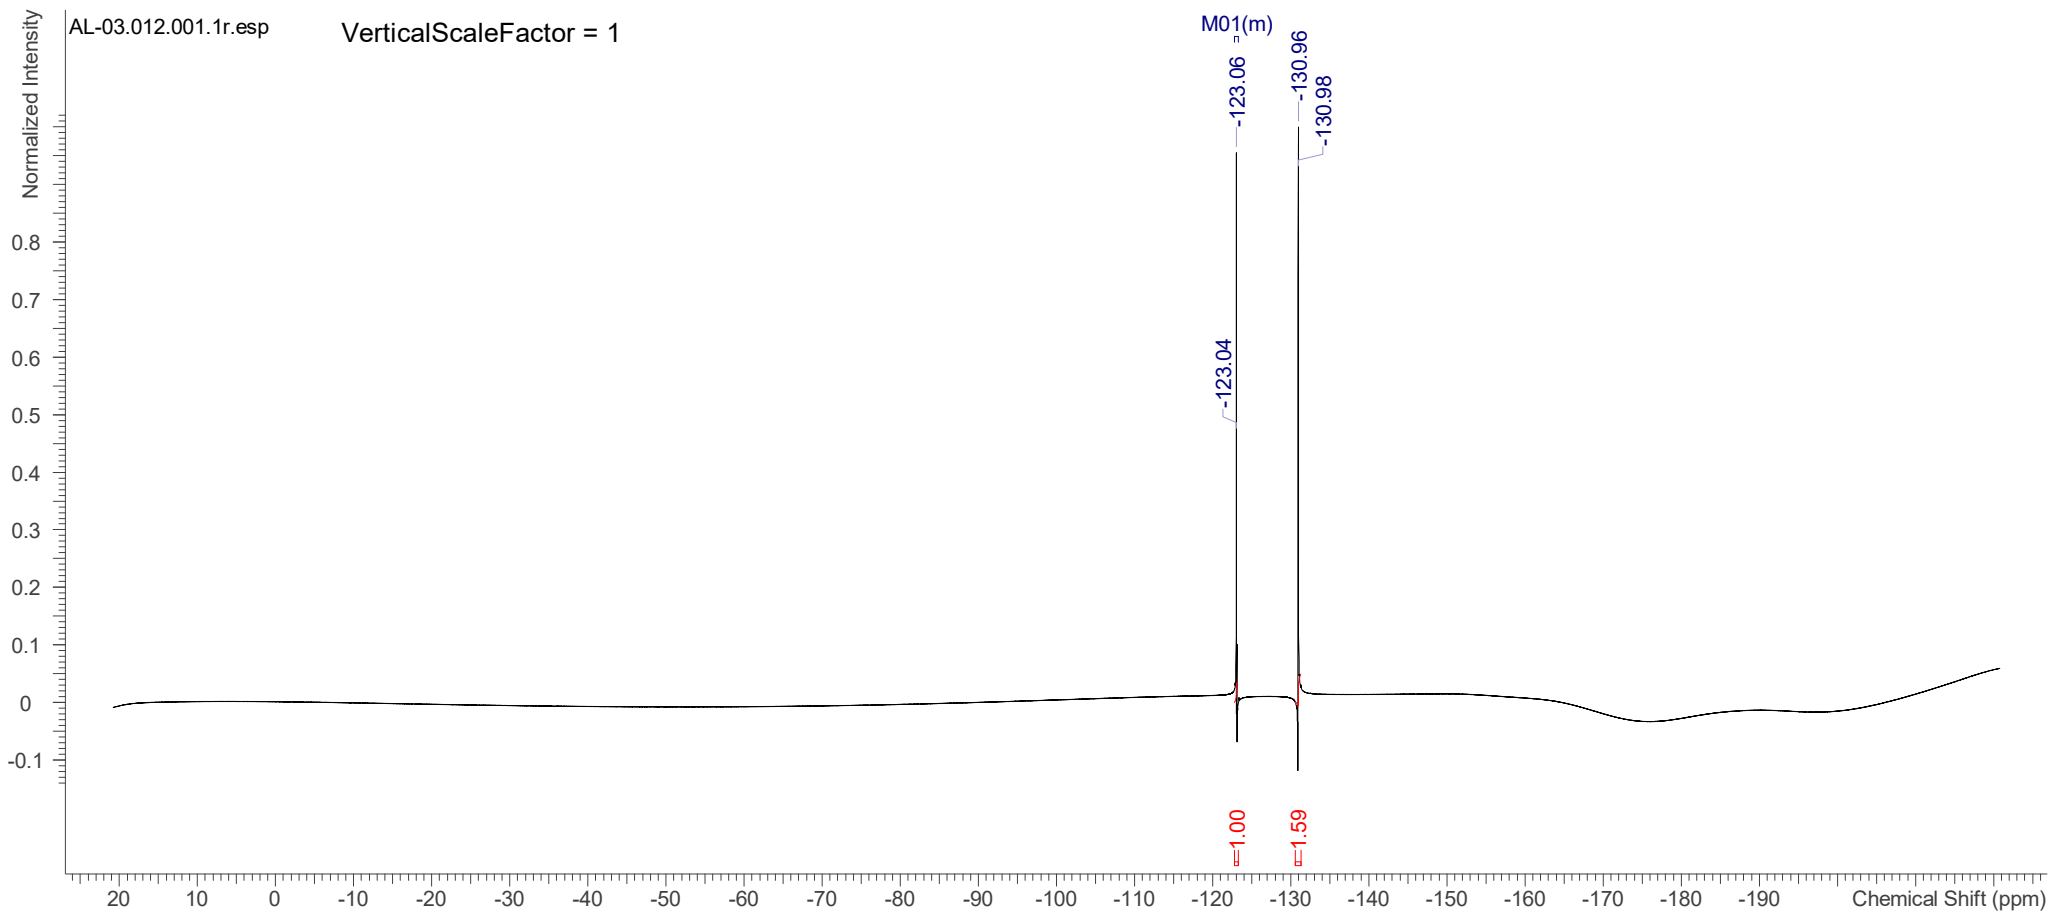

Multiplets Integrals Sum 16.85 Number of Nuclei 16 H's / 18 H's (spectrum / structure)

$^1\text{H}$  NMR (500 MHz, METHANOL- $d_4$ , ppm)  $\delta$ = 7.72 (1 H, br d,  $J$  = 12.66 Hz), 7.32 – 7.26 (3 H, m), 7.10 (1 H, t,  $J$  = 8.85 Hz), 6.90 (2 H, d,  $J$  = 8.70 Hz), 3.49 (2 H, m), 3.10 (2 H, m), 2.76 (1 H, m), 2.12 (2 H, m), 2.05 – 1.92 (2 H, m);

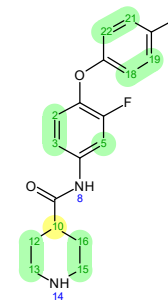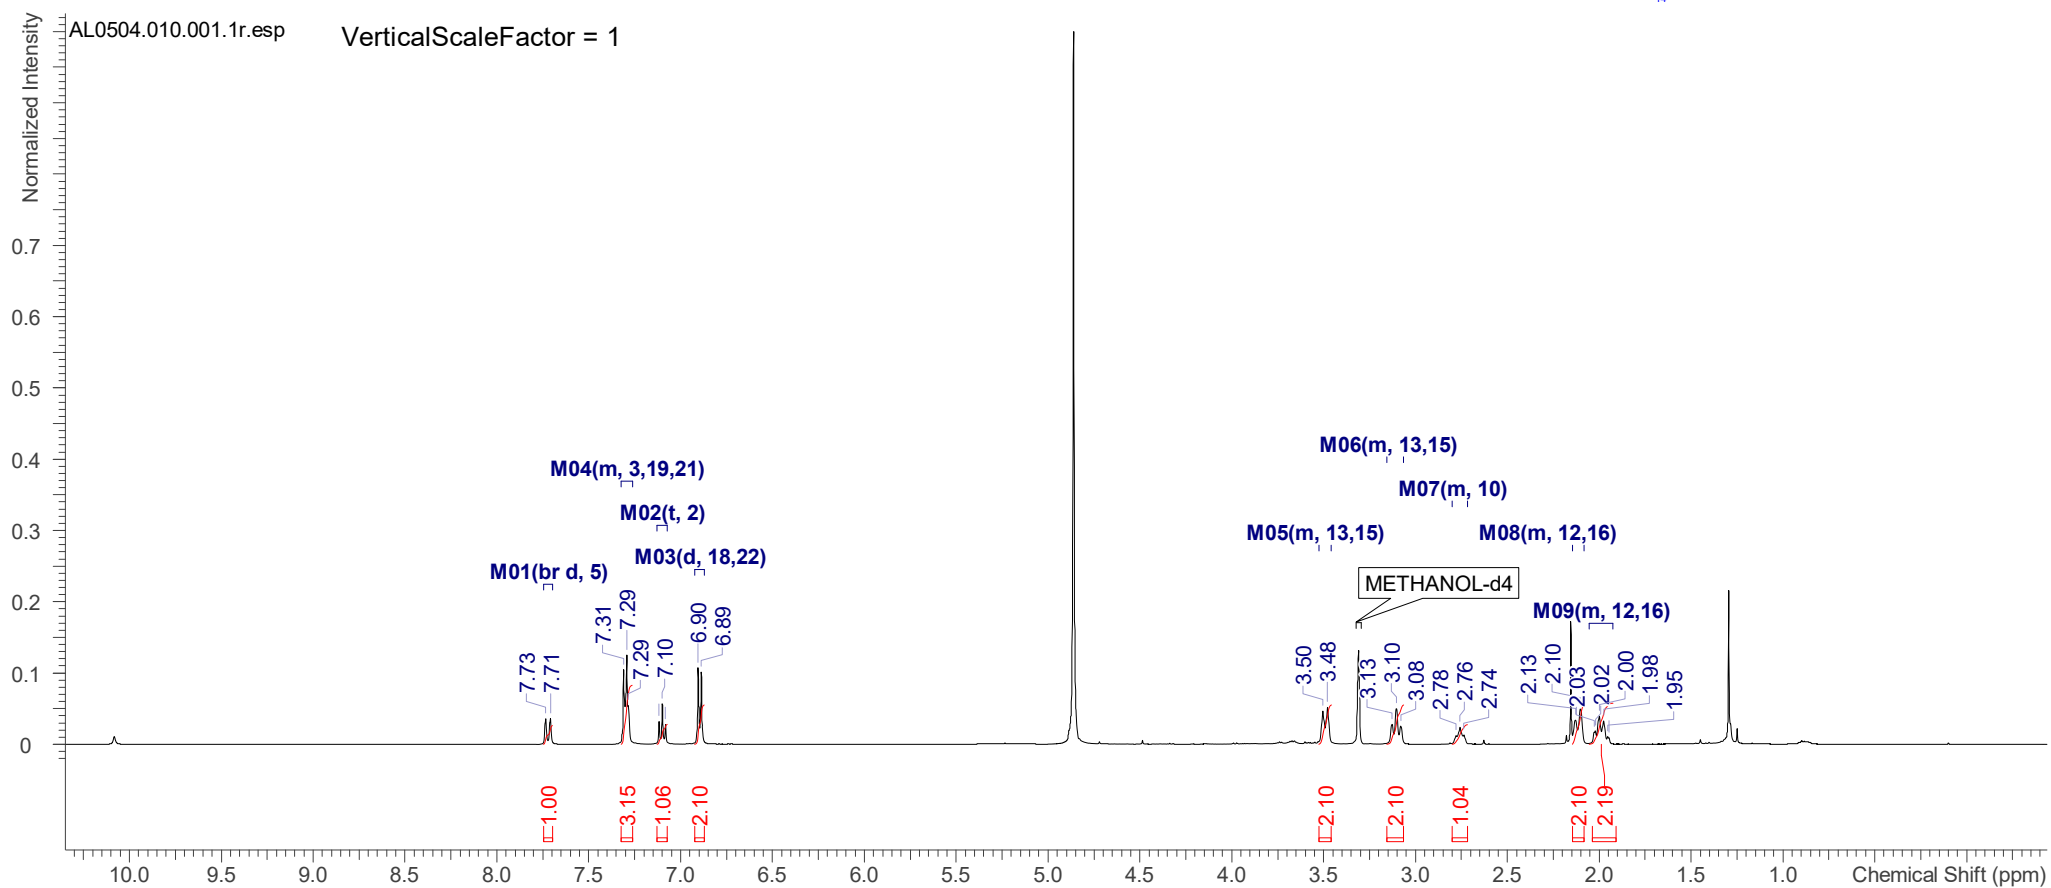

Multiplets Integrals Sum 8.46 Number of Nuclei 18 C's / 18 C's (spectrum / structure)

$^{13}\text{C}$  NMR (126 MHz, METHANOL- $d_4$ , ppm)  $\delta$ = 26.7 (2 C, s), 41.8 (1 C, s), 44.5 (2 C, s), 110.3 (1 C, d,  $J$  = 22.98 Hz), 117.8 (1 C, d,  $J$  = 3.68 Hz), 119.0 (2 C, s), 124.0 (1 C, s), 129.0 (1 C, s), 130.9 (2 C, s), 137.8 (1 C, d,  $J$  = 9.19 Hz), 140.2 (1 C, d,  $J$  = 11.95 Hz), 155.5 (1 C, d,  $J$  = 247.27 Hz), 158.3 (1 C, s), 174.3 (1 C, s);

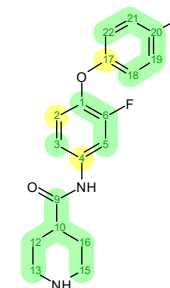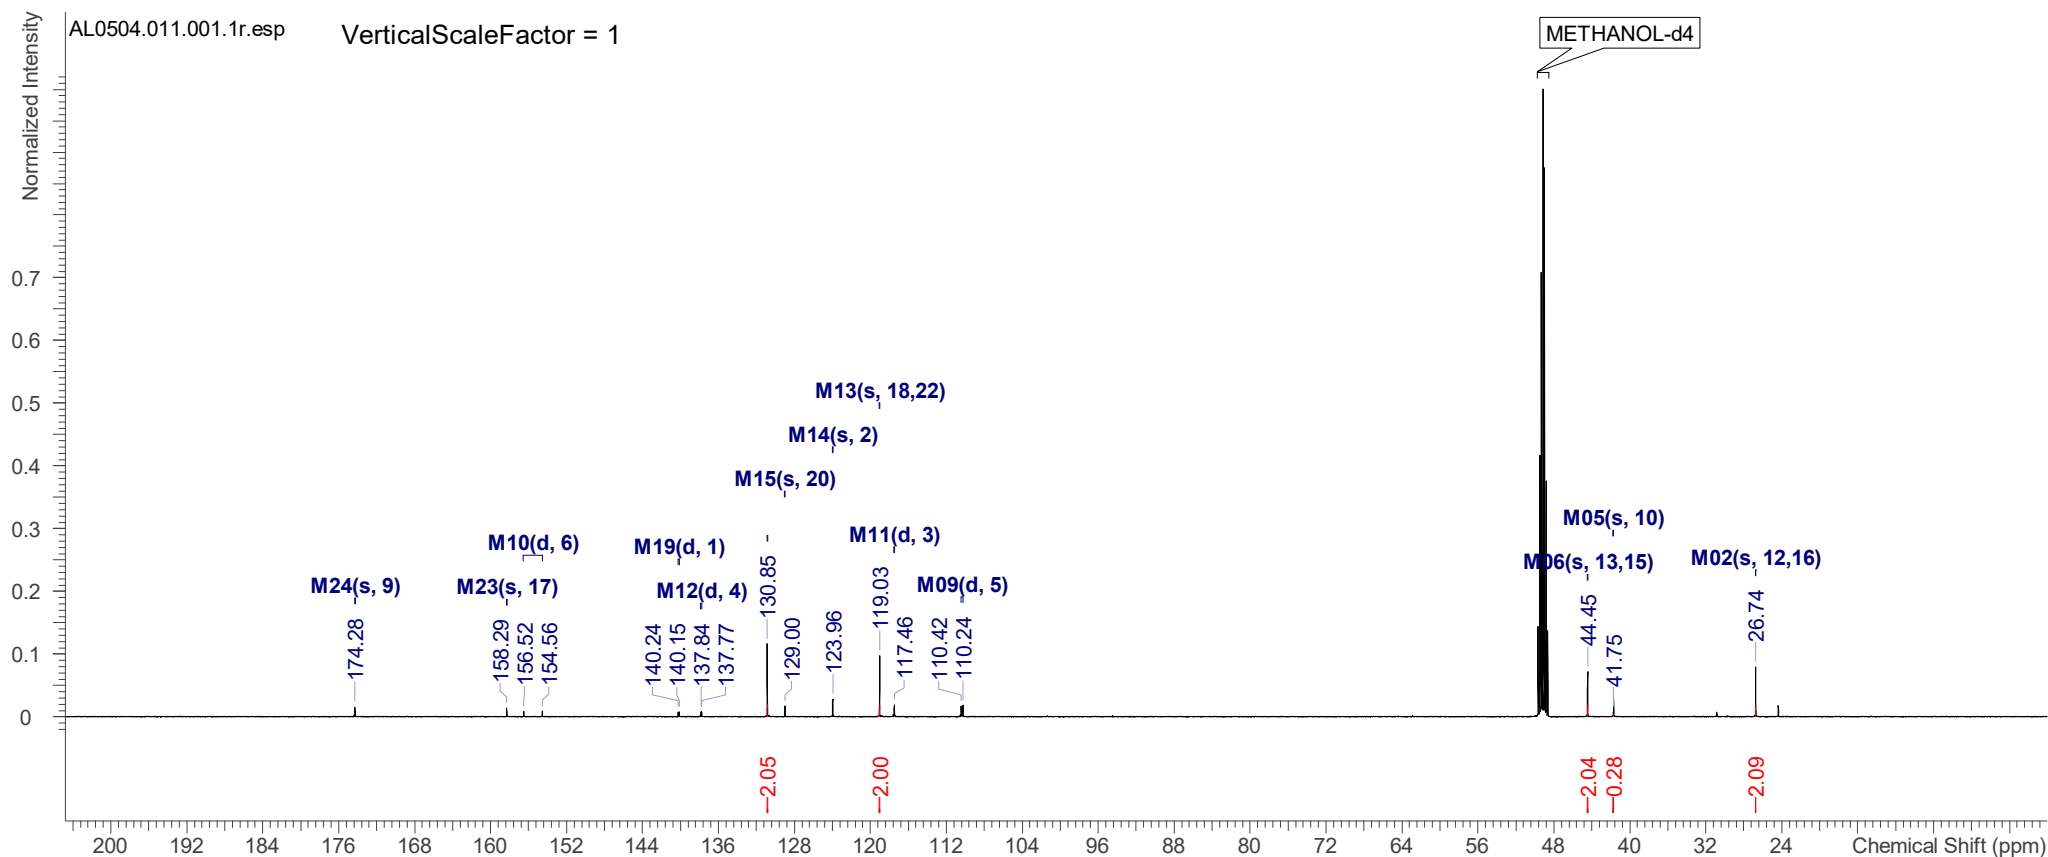

Compound 7f

4/2/2024 10:02:37 AM

|                  |                                      |                          |      |
|------------------|--------------------------------------|--------------------------|------|
| Number of Nuclei | 1 F's / 1 F's (spectrum / structure) | Multiplets Integrals Sum | 1.00 |
|------------------|--------------------------------------|--------------------------|------|

$^{19}\text{F}$  NMR (470 MHz, METHANOL- $d_4$ , ppm)  $\delta = -130.4$  (1 F, br dd,  $J = 12.14, 8.67$  Hz).

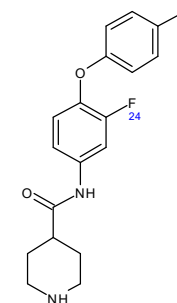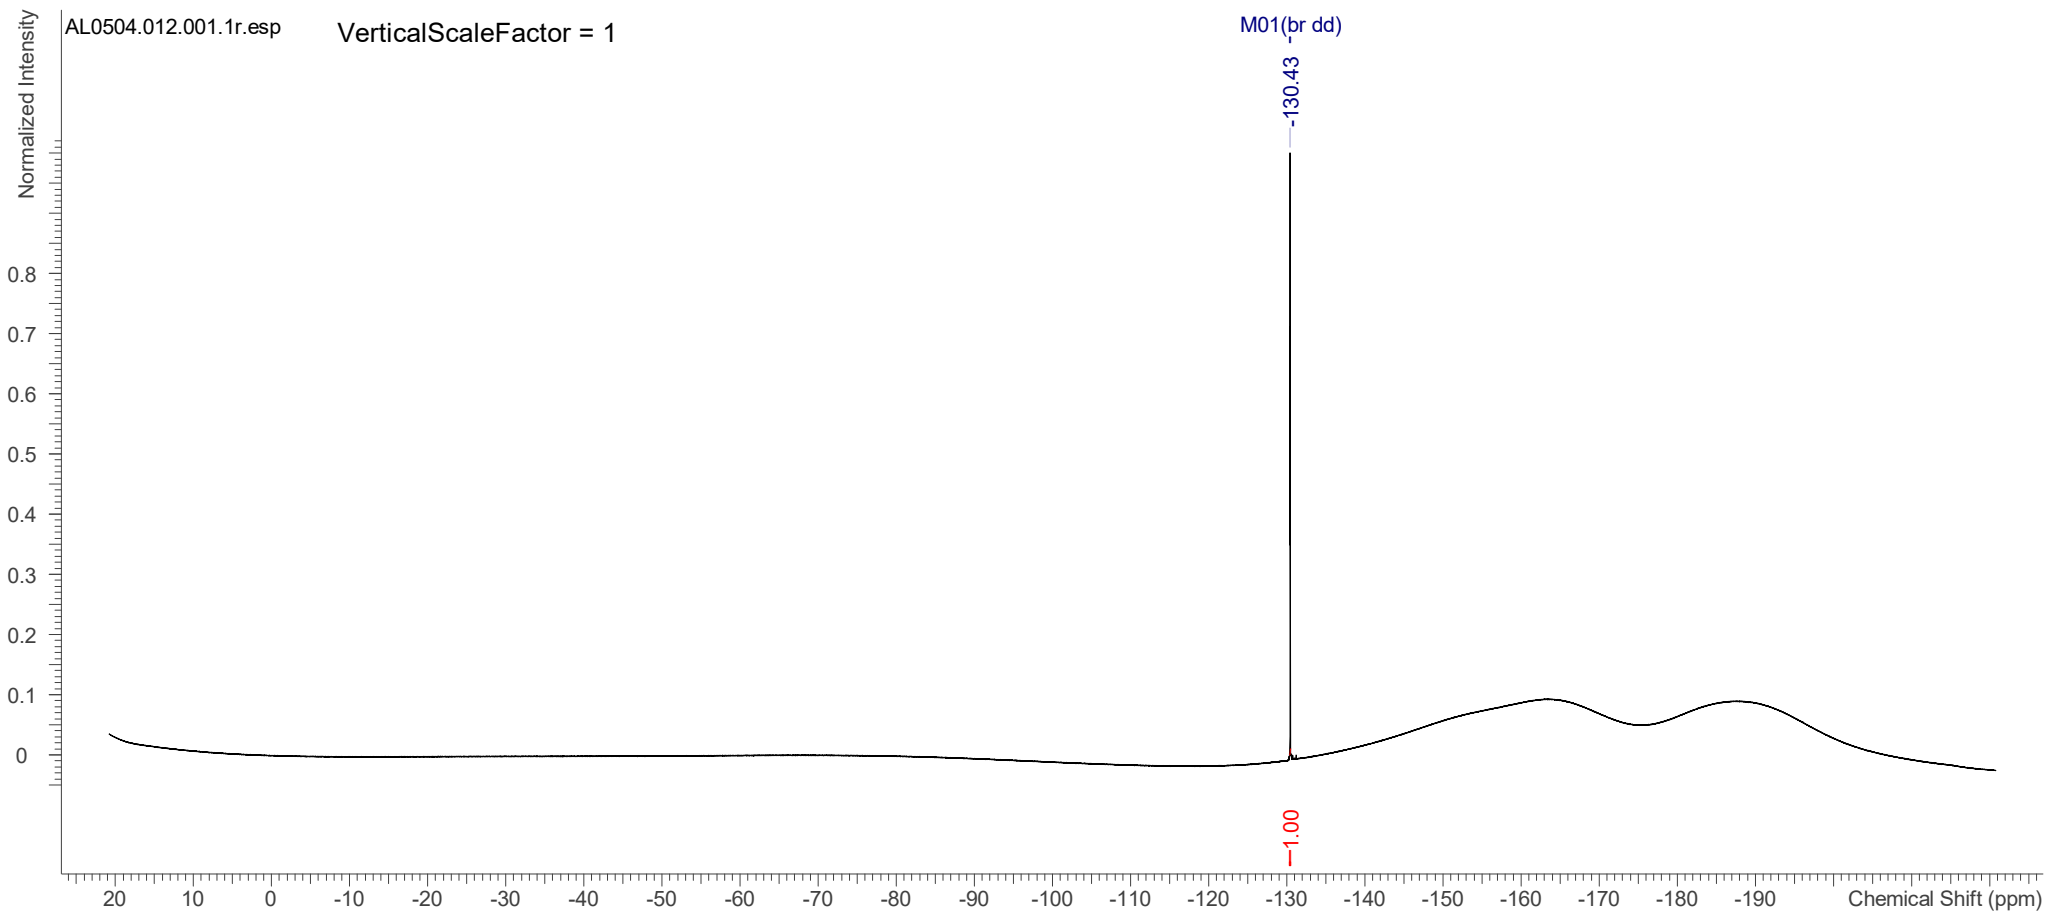

Compound 7g

4/2/2024 10:02:54 AM

|                         |                                        |                                       |
|-------------------------|----------------------------------------|---------------------------------------|
| <b>Number of Nuclei</b> | 16 H's / 18 H's (spectrum / structure) | <b>Multiplets Integrals Sum</b> 17.14 |
|-------------------------|----------------------------------------|---------------------------------------|

<sup>1</sup>H NMR (500 MHz, METHANOL-d<sub>4</sub>, ppm) δ= 7.89 (1 H, d, J = 2.44 Hz), 7.44 (1 H, dd, J = 8.77, 2.21 Hz), 7.10 – 7.04 (2 H, m), 6.99 (1 H, d, J = 8.70 Hz), 6.91 (2 H, dd, J = 9.00, 4.27 Hz), 3.49 (2 H, m), 3.10 (2 H, m), 2.78 – 2.71 (1 H, m), 2.14 – 2.08 (2 H, m), 2.03 – 1.93 (2 H, m);

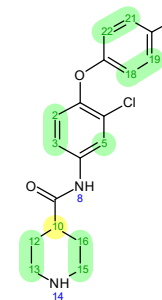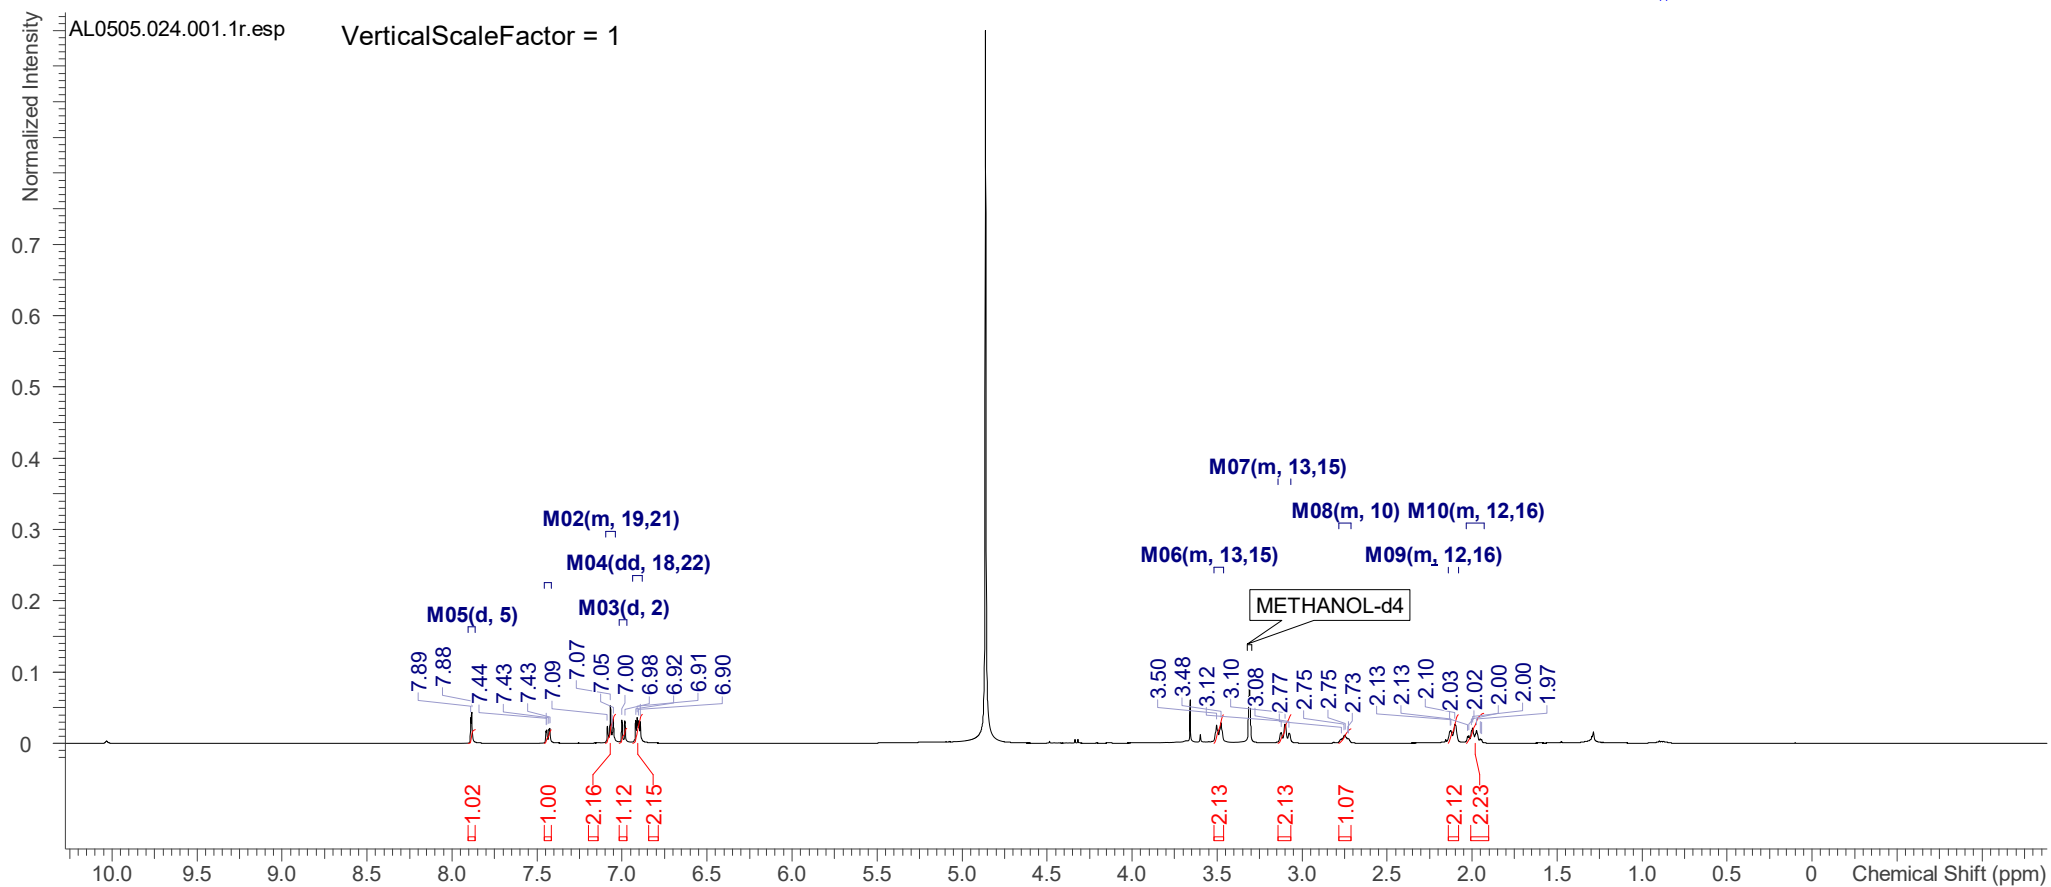

Compound 7g

4/2/2024 10:02:58 AM

|                         |                                        |                                      |
|-------------------------|----------------------------------------|--------------------------------------|
| <b>Number of Nuclei</b> | 18 C's / 18 C's (spectrum / structure) | <b>Multiplets Integrals Sum</b> 0.00 |
|-------------------------|----------------------------------------|--------------------------------------|

<sup>13</sup>C NMR (126 MHz, METHANOL-d<sub>4</sub>, ppm) δ= 26.7 (2 C, s), 41.7 (1 C, s), 44.4 (2 C, s), 117.4 (2 C, d, J = 23.90 Hz), 119.9 (2 C, d, J = 8.27 Hz), 121.2 (1 C, s), 122.5 (1 C, s), 123.4 (1 C, s), 127.1 (1 C, s), 137.0 (1 C, s), 150.0 (1 C, s), 155.0 (1 C, d, J = 1.84 Hz), 160.2 (1 C, d, J = 239.91 Hz), 174.3 (1 C, s);

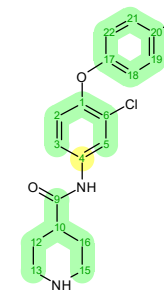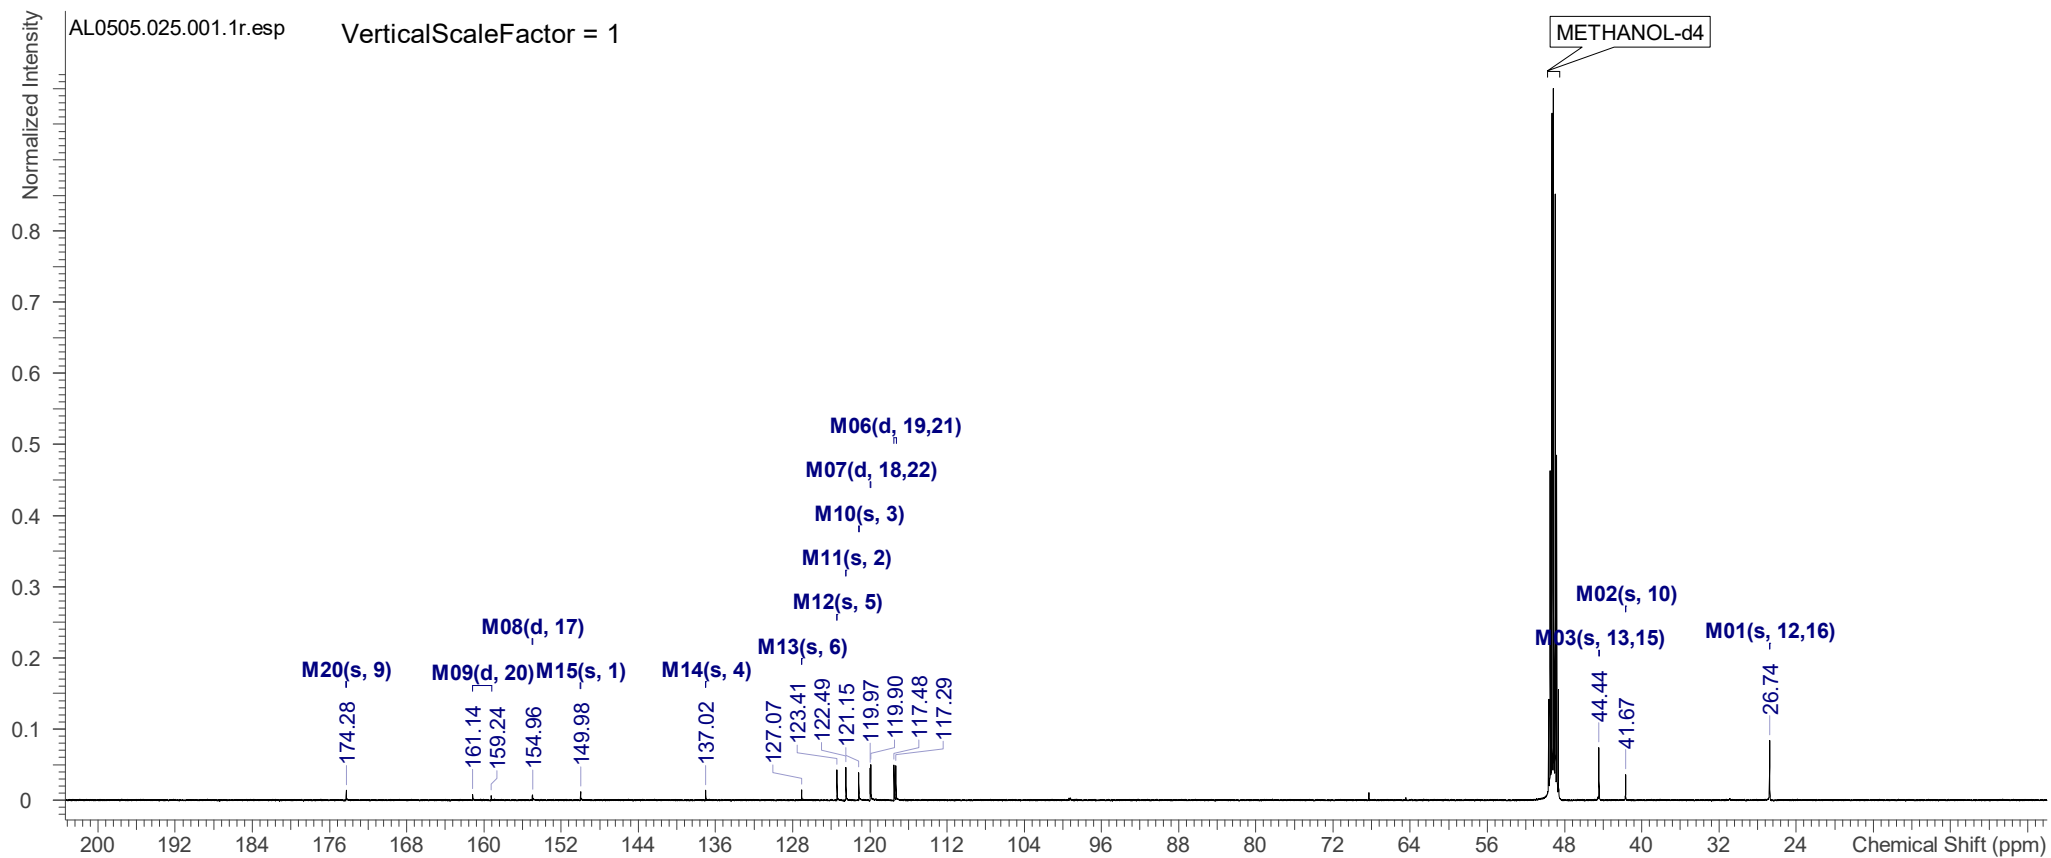

Compound 7g

4/2/2024 10:03:01 AM

|                         |                                      |                                 |      |
|-------------------------|--------------------------------------|---------------------------------|------|
| <b>Number of Nuclei</b> | 1 F's / 1 F's (spectrum / structure) | <b>Multiplets Integrals Sum</b> | 1.00 |
|-------------------------|--------------------------------------|---------------------------------|------|

$^{19}\text{F}$  NMR (470 MHz, METHANOL- $d_4$ , ppm)  $\delta$ = -122.8 – -122.7 (1 F, m).

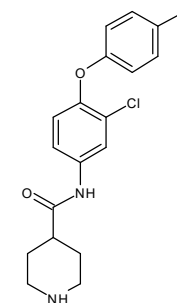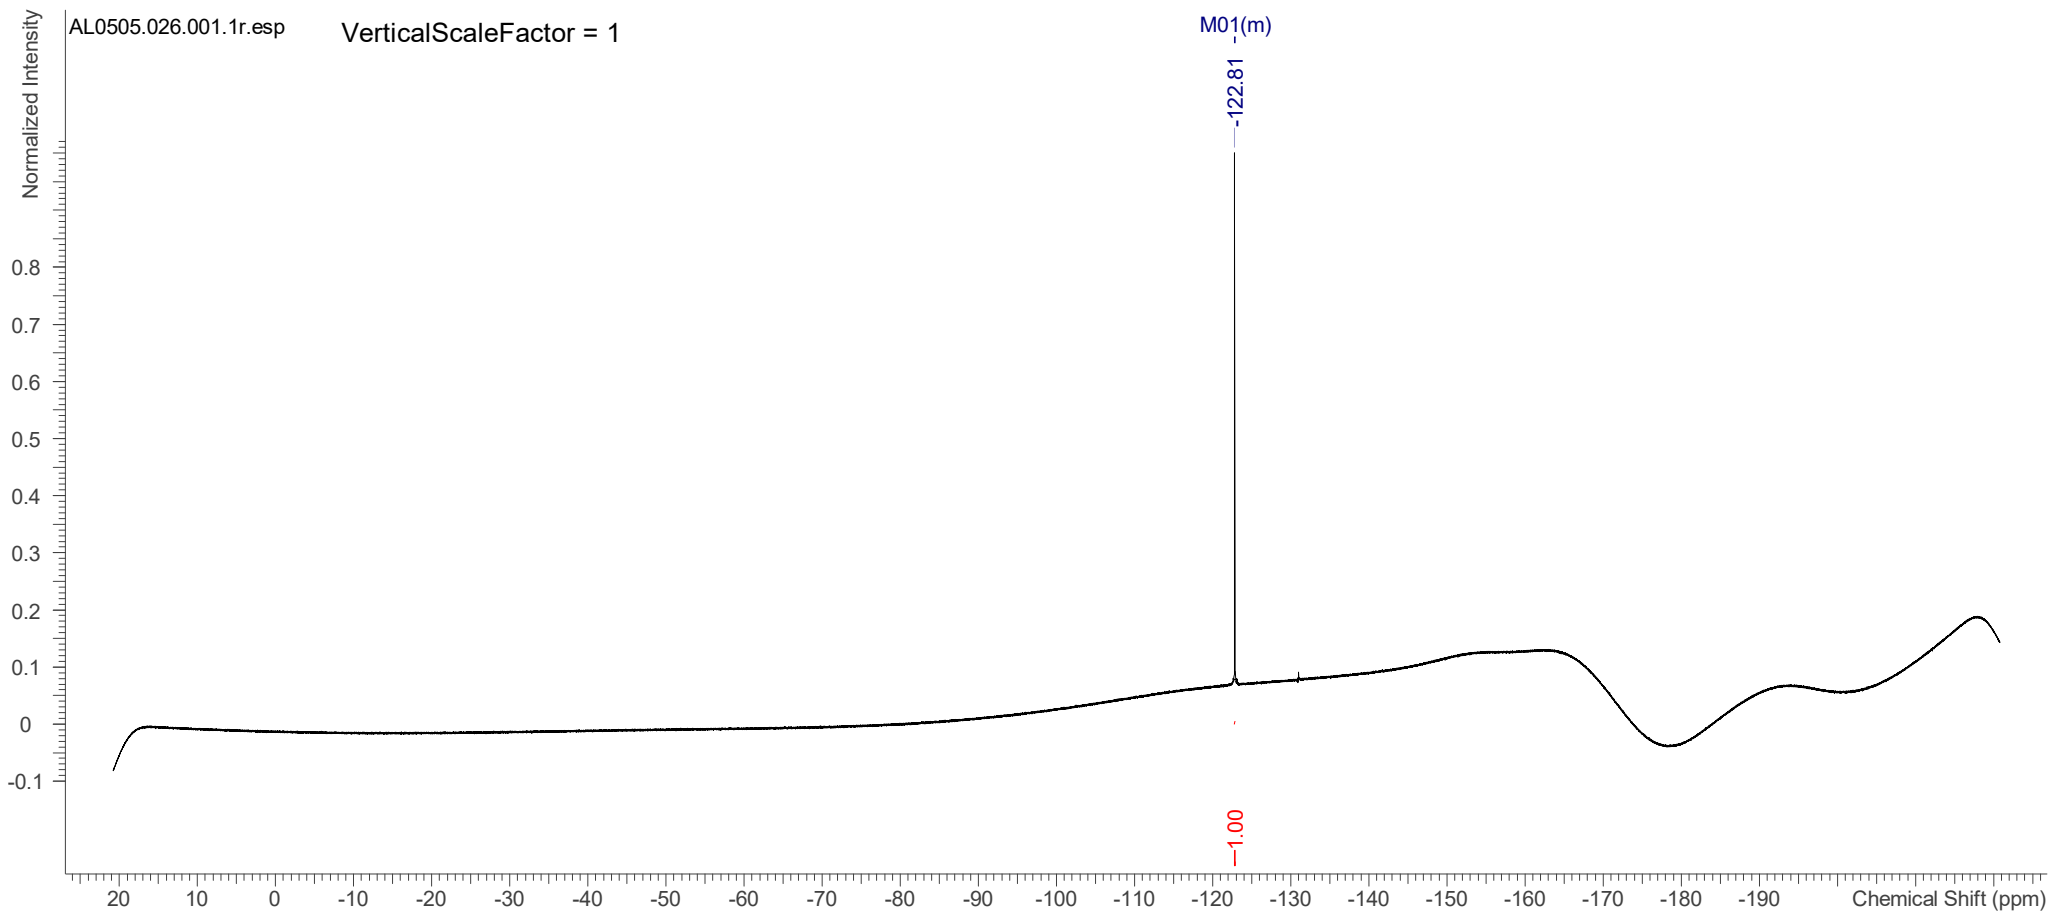

Compound 7h

7/25/2023 9:27:42 AM

Multiplets Integrals Sum 17.14 Number of Nuclei 16 H's / 18 H's (spectrum / structure)

<sup>1</sup>H NMR (500 MHz, METHANOL-d<sub>4</sub>, ppm) δ= 7.90 (1 H, d, J = 2.44 Hz), 7.49 – 7.42 (3 H, m), 7.06 (1 H, d, J = 8.85 Hz), 6.80 (2 H, d, J = 8.70 Hz), 3.48 (2 H, m), 3.09 (2 H, m), 2.75 (1 H, m), 2.11 (2 H, m), 2.04 – 1.91 (2 H, m);

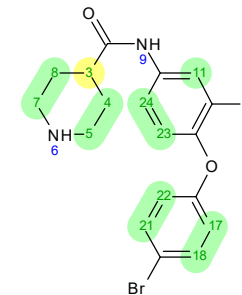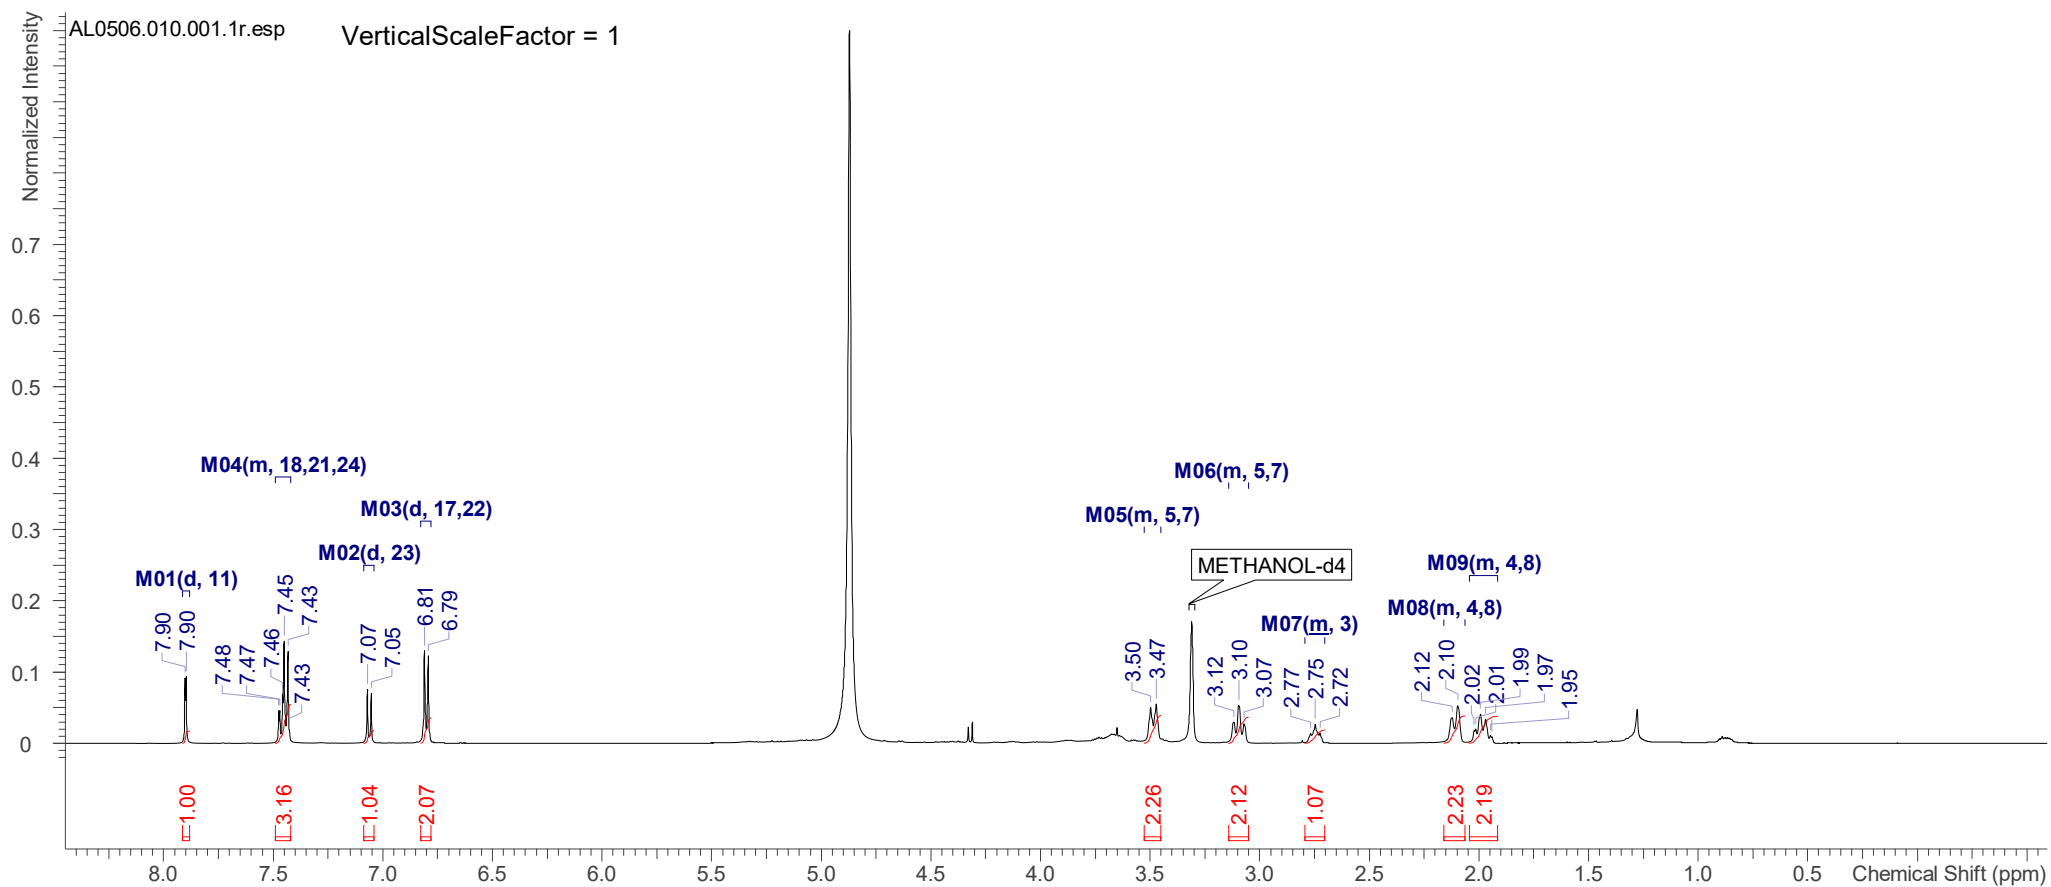

Compound 7h

7/25/2023 9:27:48 AM

|                         |                                        |                                      |
|-------------------------|----------------------------------------|--------------------------------------|
| <b>Number of Nuclei</b> | 18 C's / 18 C's (spectrum / structure) | <b>Multiplets Integrals Sum</b> 0.00 |
|-------------------------|----------------------------------------|--------------------------------------|

<sup>13</sup>C NMR (126 MHz, METHANOL-d<sub>4</sub>, ppm) δ= 174.3 (1 C, s), 158.4 (1 C, s), 148.9 (1 C, s), 137.6 (1 C, s), 133.9 (2 C, s), 127.6 (1 C, s), 123.4 (1 C, s), 123.4 († C, s), 121.2 (2 C, s), 119.8 (1 C, s), 116.3 (1 C, s), 44.4 (2 C, s), 41.7 (1 C, s), 26.7 (2 C, s).

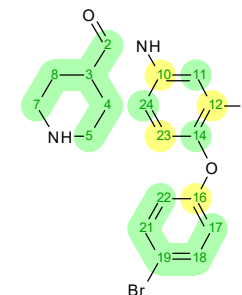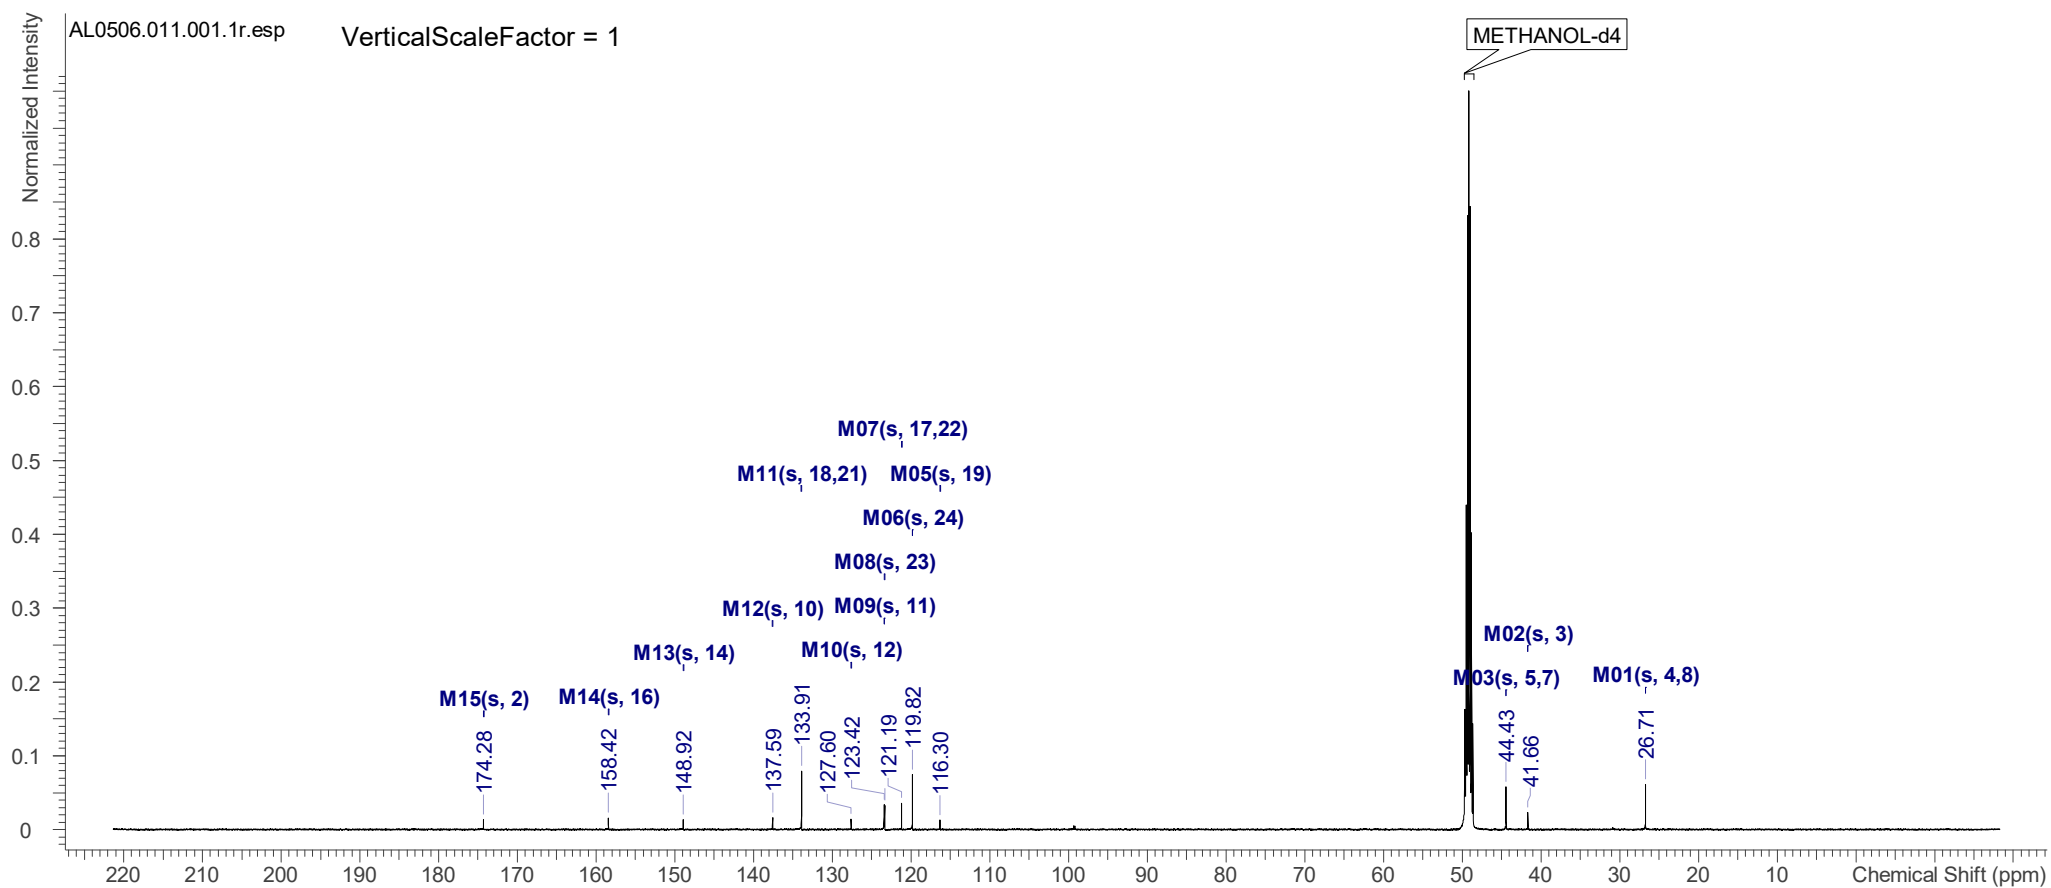

Compound 7i

7/25/2023 9:28:05 AM

Multiplets Integrals Sum 16.45 Number of Nuclei 16 H's / 18 H's (spectrum / structure)

<sup>1</sup>H NMR (500 MHz, METHANOL-*d*<sub>4</sub>, ppm) δ= 7.90 (1 H, d, J = 2.29 Hz), 7.63 (2 H, d, J = 8.70 Hz), 7.47 (1 H, dd, J = 8.85, 2.29 Hz), 7.07 (1 H, d, J = 8.85 Hz), 6.69 (2 H, d, J = 8.70 Hz), 3.49 (2 H, m), 3.10 (2 H, m), 2.75 (1 H, m), 2.12 (2 H, m), 2.04 – 1.96 (2 H, m);

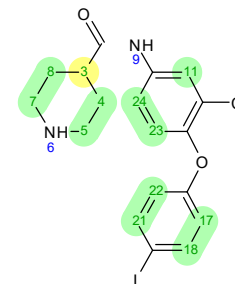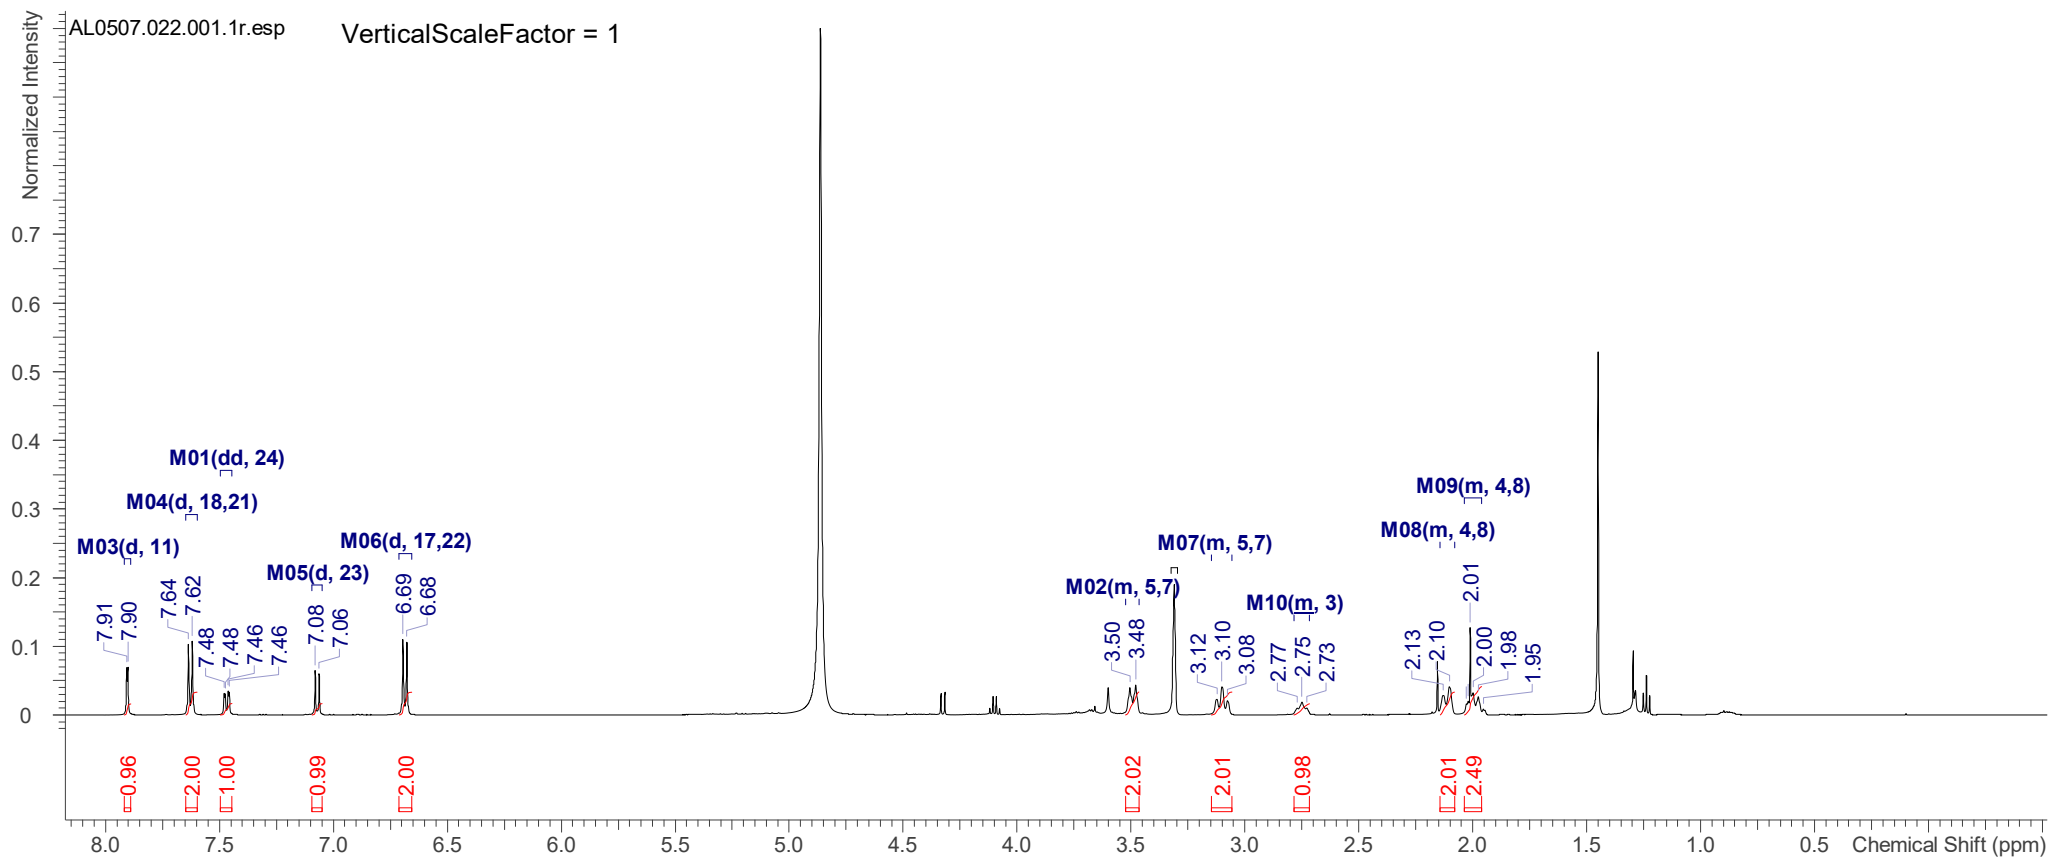

Compound 7i

7/25/2023 9:28:11 AM

|                         |                                        |                                       |
|-------------------------|----------------------------------------|---------------------------------------|
| <b>Number of Nuclei</b> | 18 C's / 18 C's (spectrum / structure) | <b>Multiplets Integrals Sum</b> 12.77 |
|-------------------------|----------------------------------------|---------------------------------------|

<sup>13</sup>C NMR (126 MHz, METHANOL-d<sub>4</sub>, ppm) δ= 174.3 (1 C, s), 159.2 (1 C, s), 148.8 (1 C, s), 140.0 (2 C, s), 137.6 (1 C, s), 127.7 (1 C, s), 123.5 (1 C, s), 123.4 (1 C, s), 121.2 (1 C, s), 120.2 (2 C, s), 86.3 (1 C, s), 44.4 (2 C, s), 41.7 (1 C, s), 28.1 (2 C, s).

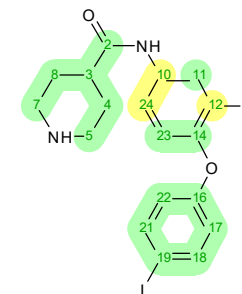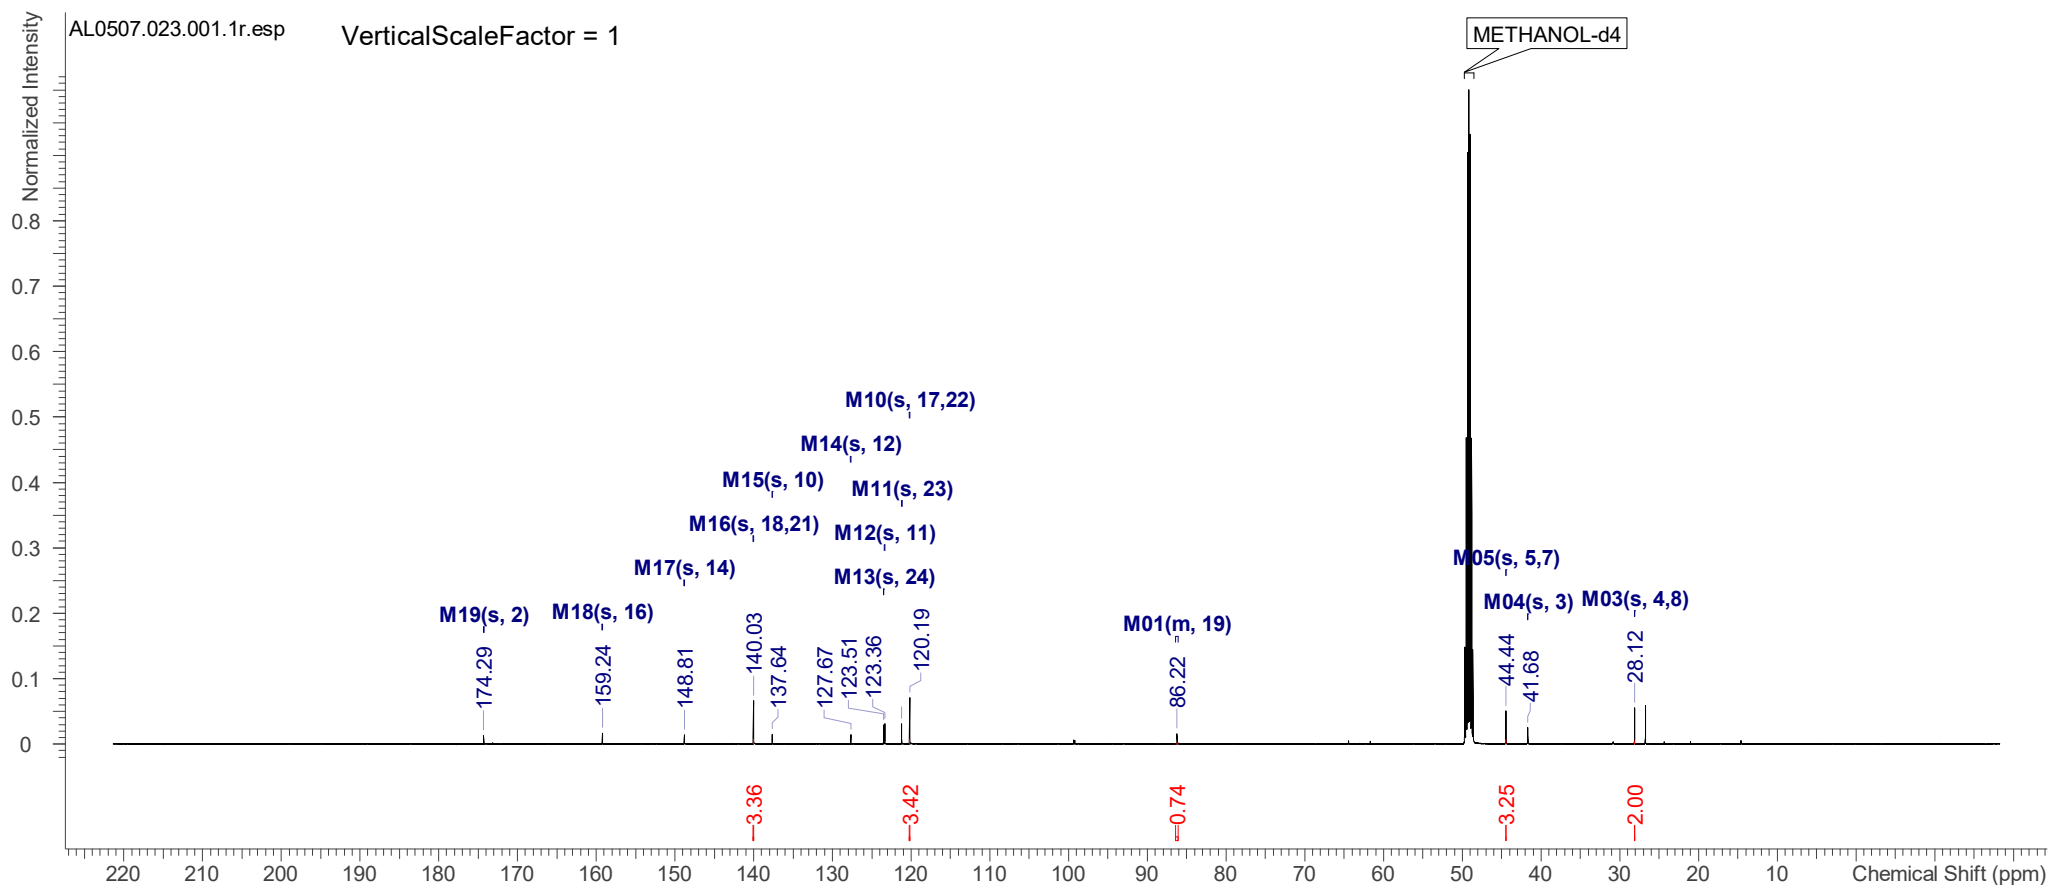

Compound 8

8/16/2022 10:15:54 AM

|                  |                                        |                          |       |
|------------------|----------------------------------------|--------------------------|-------|
| Number of Nuclei | 19 H's / 20 H's (spectrum / structure) | Multiplets Integrals Sum | 19.02 |
|------------------|----------------------------------------|--------------------------|-------|

<sup>1</sup>H NMR (500 MHz, METHANOL-d<sub>4</sub>, ppm) δ= 7.87 (1 H, d, J = 2.59 Hz), 7.45 (1 H, dd, J = 8.85, 2.59 Hz), 7.33 – 7.28 (2 H, m), 7.05 (1 H, d, J = 8.85 Hz), 6.88 – 6.84 (2 H, m), 2.96 (2 H, m), 2.35 (1 H, m), 2.28 (3 H, s), 2.09 (2 H, m), 1.90 – 1.84 (4 H, m);

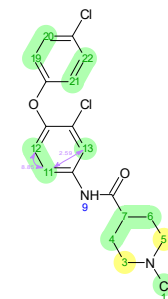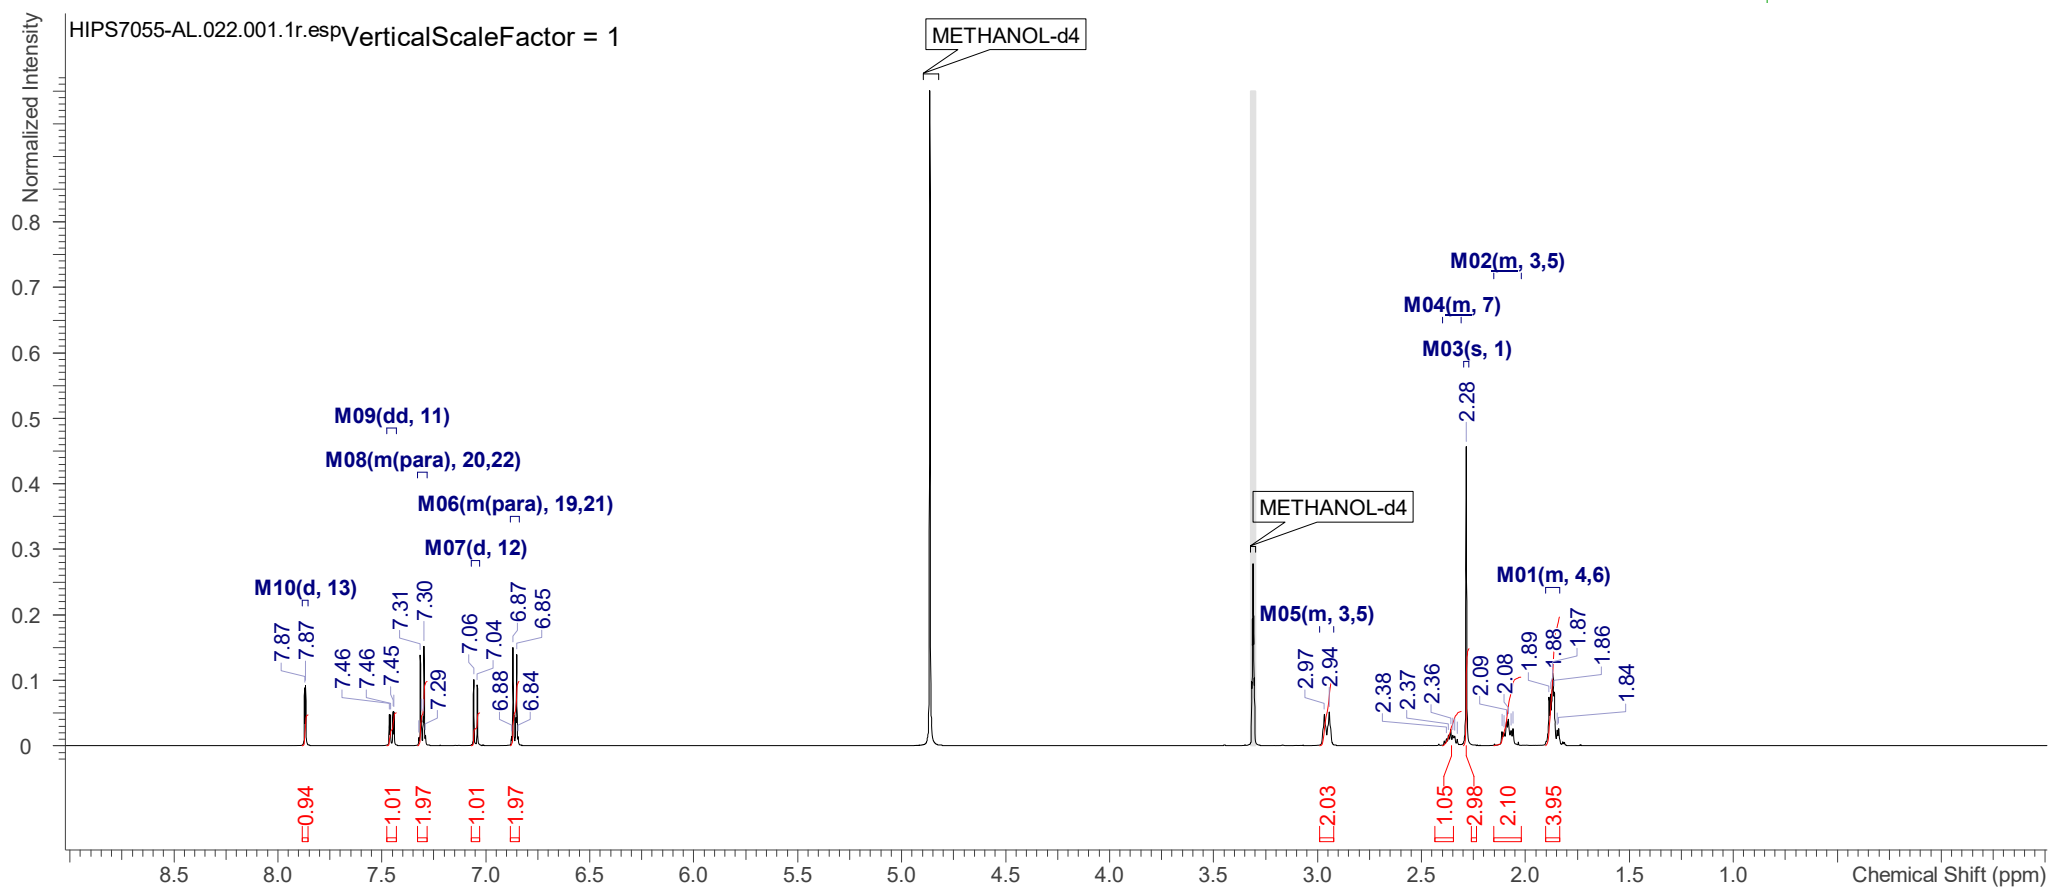

Compound 8

8/16/2022 10:15:59 AM

|                  |                                        |                          |      |
|------------------|----------------------------------------|--------------------------|------|
| Number of Nuclei | 17 C's / 19 C's (spectrum / structure) | Multiplets Integrals Sum | 0.00 |
|------------------|----------------------------------------|--------------------------|------|

<sup>13</sup>C NMR (126 MHz, METHANOL-d<sub>4</sub>, ppm) δ= 176.3 (1 C, s), 158.0 (1 C, s), 148.8 (1 C, s), 137.9 (1 C, s), 130.9 (2 C, s), 129.0 (1 C, s), 127.6 (1 C, s), 123.4 (1 C, s), 123.3 (1 C, s), 121.2 (1 C, s), 119.4 (2 C, s), 56.1 (1 C, s), 46.5 (1 C, s), 44.2 (1 C, s), 29.7 (1 C, s).

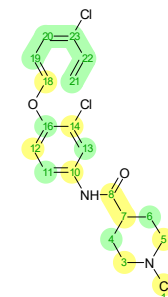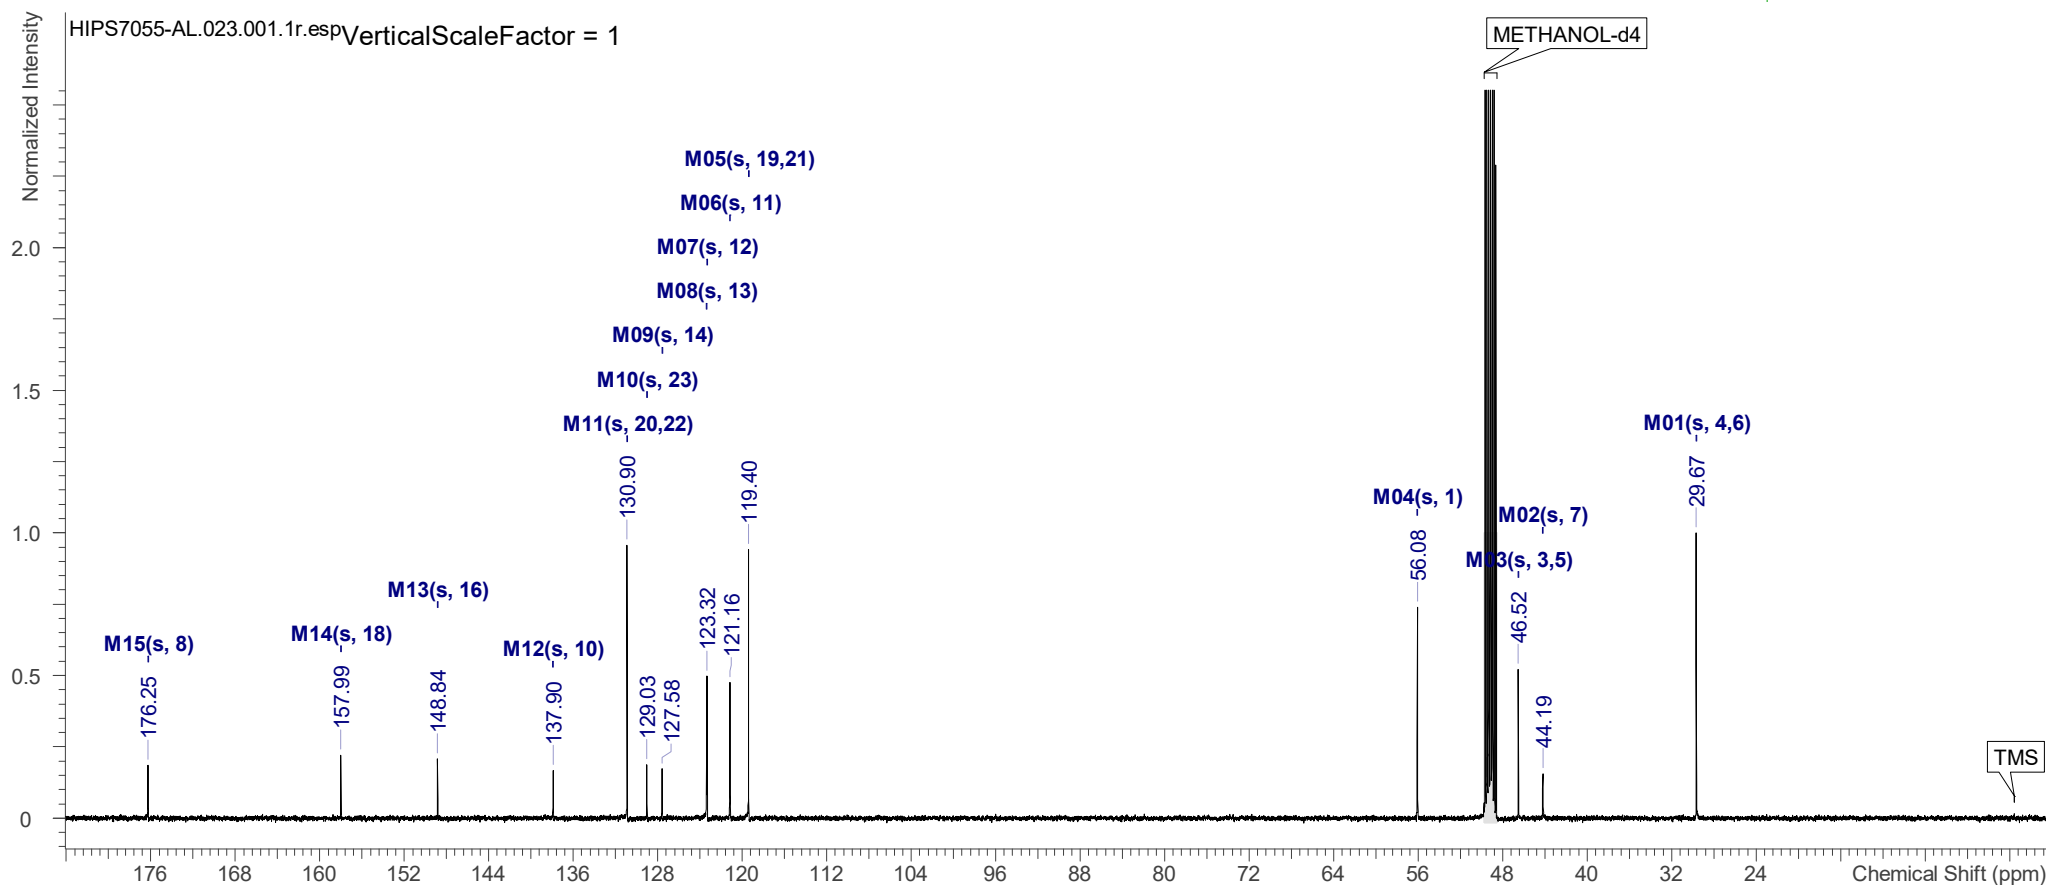

Compound 9

10/25/2023 10:15:55 AM

|                         |                                        |                                 |       |
|-------------------------|----------------------------------------|---------------------------------|-------|
| <b>Number of Nuclei</b> | 16 H's / 17 H's (spectrum / structure) | <b>Multiplets Integrals Sum</b> | 15.35 |
|-------------------------|----------------------------------------|---------------------------------|-------|

<sup>1</sup>H NMR (500 MHz, METHANOL-d<sub>4</sub>, ppm) δ = 7.91 – 7.84 (1 H, m), 7.50 – 7.41 (1 H, m), 7.35 – 7.27 (2 H, m), 7.07 (1 H, s), 6.90 – 6.83 (2 H, m), 4.05 – 3.97 (2 H, m), 3.49 (2 H, m), 2.63 (1 H, m), 1.90 – 1.72 (4 H, m);

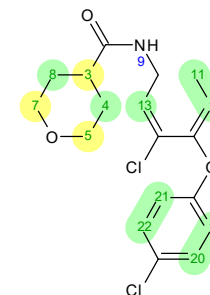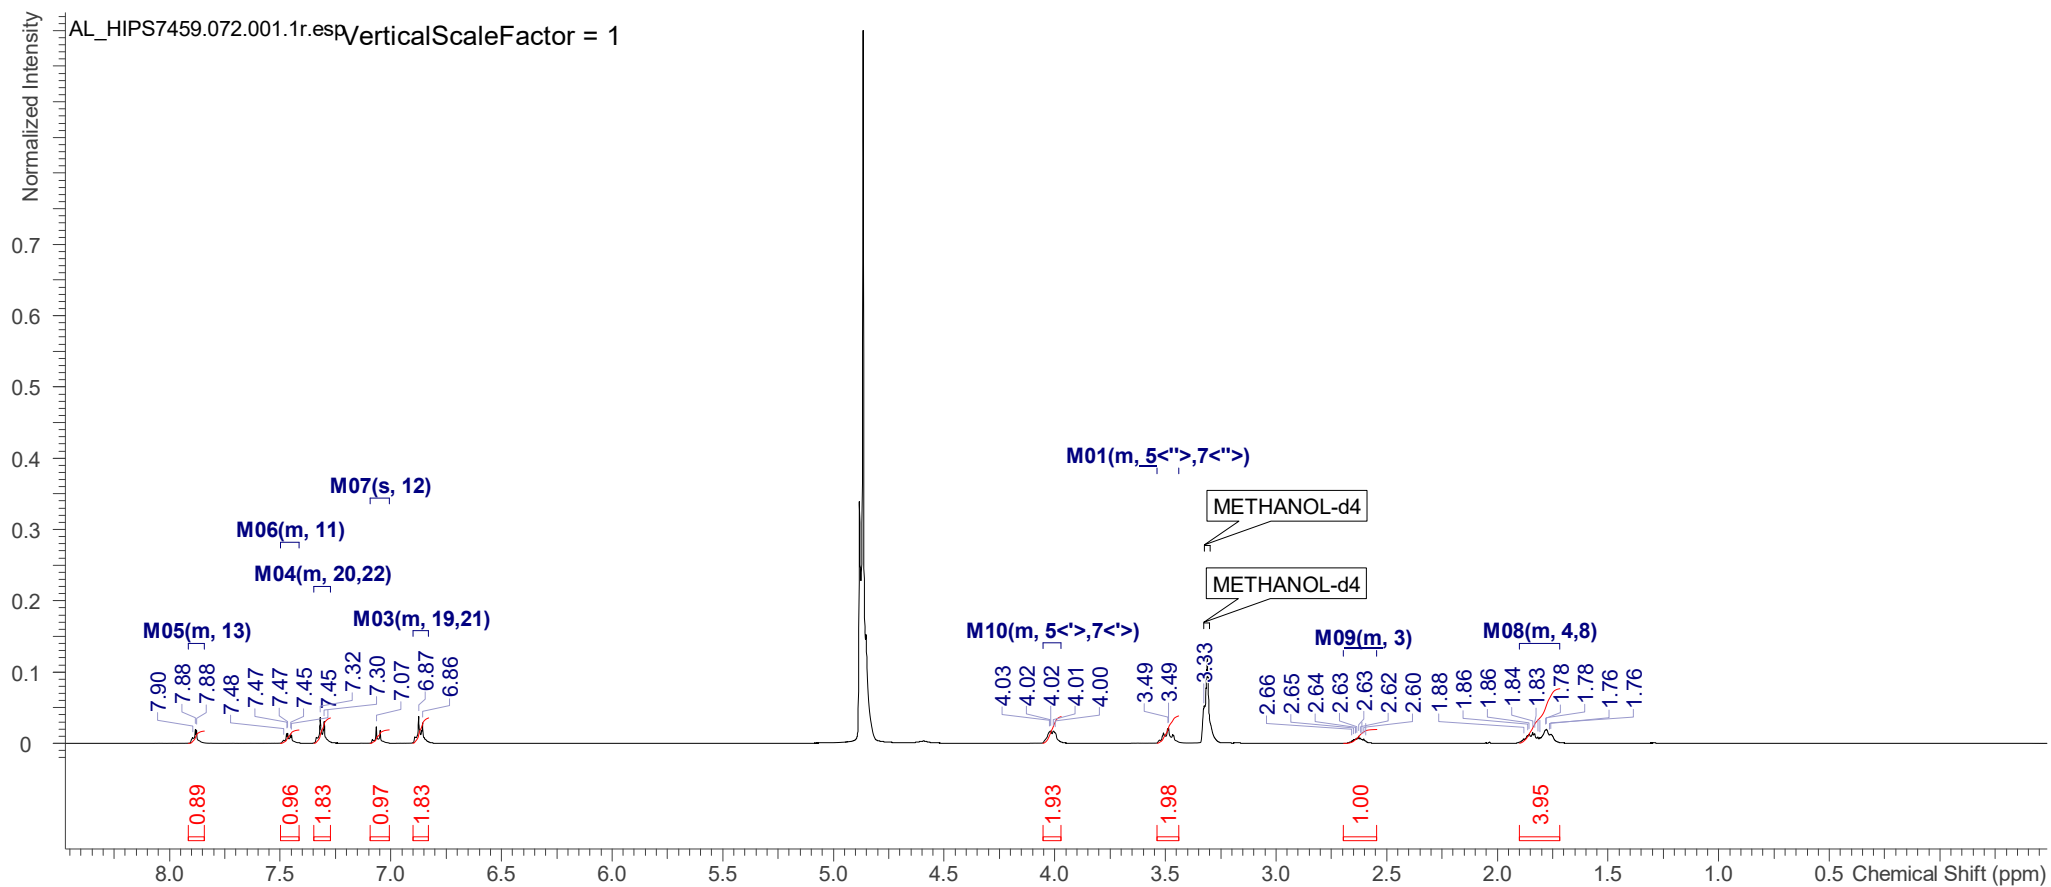

Compound 9

10/25/2023 10:15:59 AM

|                         |                                        |                                      |
|-------------------------|----------------------------------------|--------------------------------------|
| <b>Number of Nuclei</b> | 18 C's / 18 C's (spectrum / structure) | <b>Multiplets Integrals Sum</b> 0.00 |
|-------------------------|----------------------------------------|--------------------------------------|

<sup>13</sup>C NMR (126 MHz, METHANOL-d<sub>4</sub>, ppm) δ= 176.0 (1 C, s), 158.0 (1 C, s), 148.9 (1 C, s), 137.9 (1 C, s), 130.9 (2 C, s), 129.1 (1 C, s), 127.6 (1 C, s), 123.4 (2 C, s), 121.2 (1 C, s), 119.4 (2 C, s), 68.4 (2 C, s), 43.9 (1 C, s), 30.4 (2 C, s).

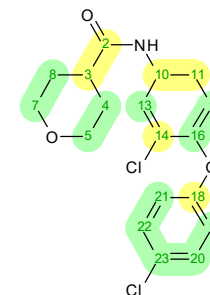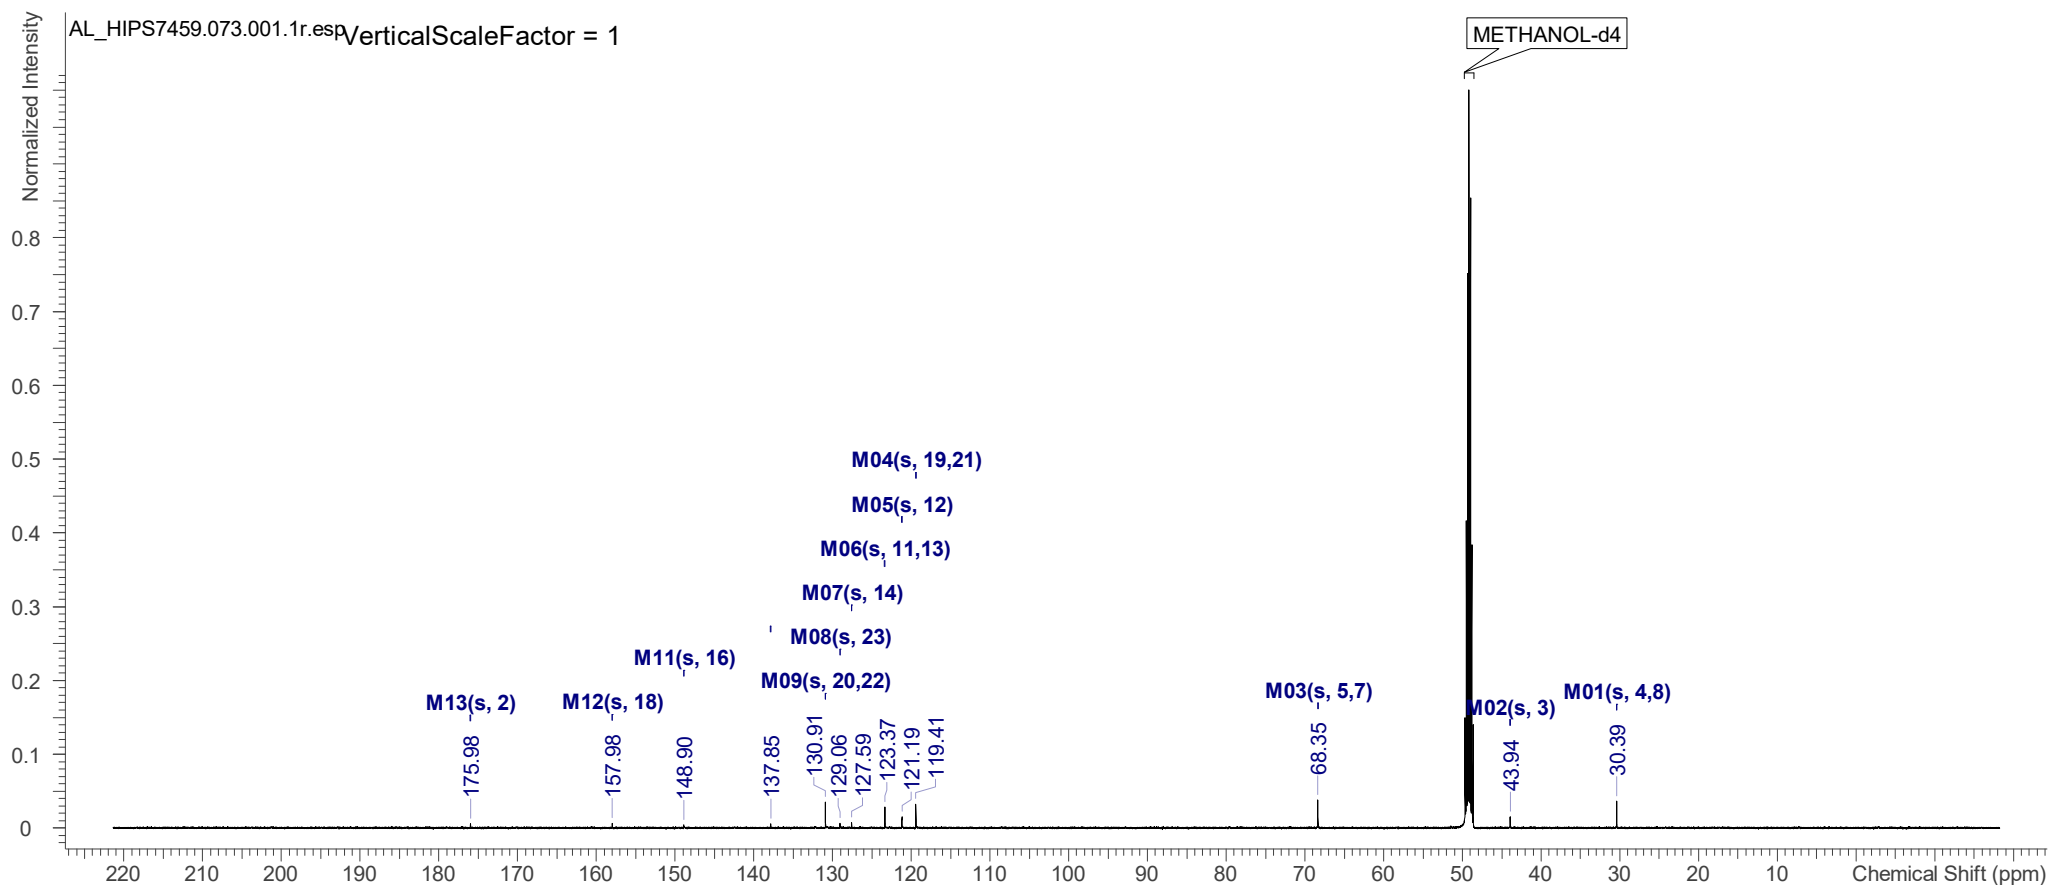

Compound 10

10/18/2023 10:12:34 AM

|                         |                                        |                                       |
|-------------------------|----------------------------------------|---------------------------------------|
| <b>Number of Nuclei</b> | 12 H's / 13 H's (spectrum / structure) | <b>Multiplets Integrals Sum</b> 11.01 |
|-------------------------|----------------------------------------|---------------------------------------|

<sup>1</sup>H NMR (500 MHz, METHANOL-d<sub>4</sub>, ppm) δ= 8.02 (1 H, d, J = 2.44 Hz), 7.94 (2 H, d, J = 7.17 Hz), 7.65 (1 H, dd, J = 8.77, 2.52 Hz), 7.60 (1 H, t, J = 7.32 Hz), 7.52 (2 H, t, J = 7.55 Hz), 7.39 – 7.26 (2 H, m), 7.11 (1 H, d, J = 8.70 Hz), 6.96 – 6.85 (2 H, m);

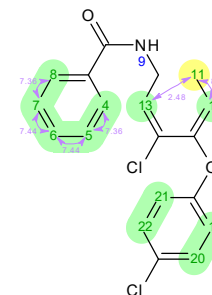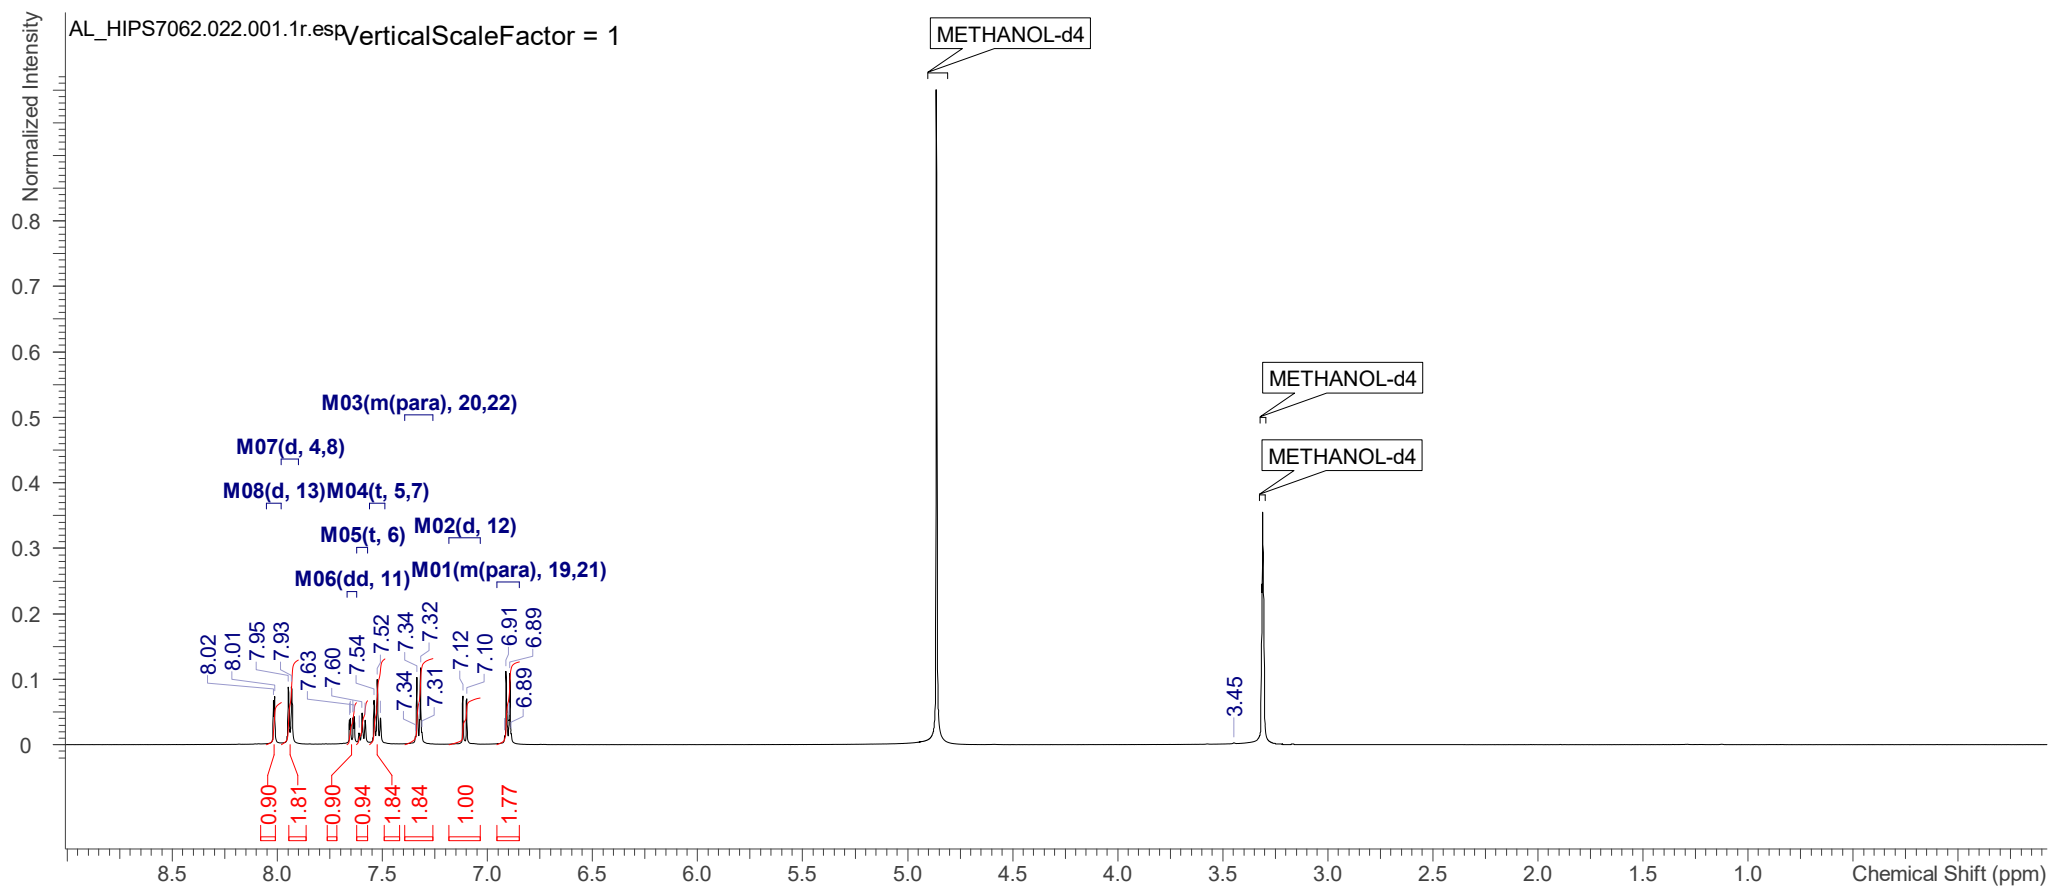

Compound 10

10/18/2023 10:12:37 AM

|                         |                                        |                                      |
|-------------------------|----------------------------------------|--------------------------------------|
| <b>Number of Nuclei</b> | 19 C's / 19 C's (spectrum / structure) | <b>Multiplets Integrals Sum</b> 0.00 |
|-------------------------|----------------------------------------|--------------------------------------|

<sup>13</sup>C NMR (126 MHz, METHANOL-d<sub>4</sub>, ppm) δ= 169.0 (1 C, s), 158.0 (1 C, s), 149.3 (1 C, s), 137.8 (1 C, s), 136.1 (1 C, s), 133.3 (1 C, s), 130.9 (2 C, s), 129.8 (2 C, s), 129.1 (1 C, s), 128.8 (2 C, s), 127.5 (1 C, s), 124.3 (1 C, s), 123.3 (1 C, s), 122.2 (1 C, s), 119.5 (2 C, s).

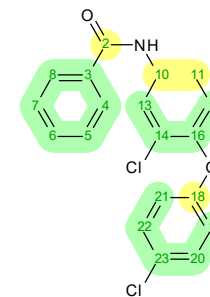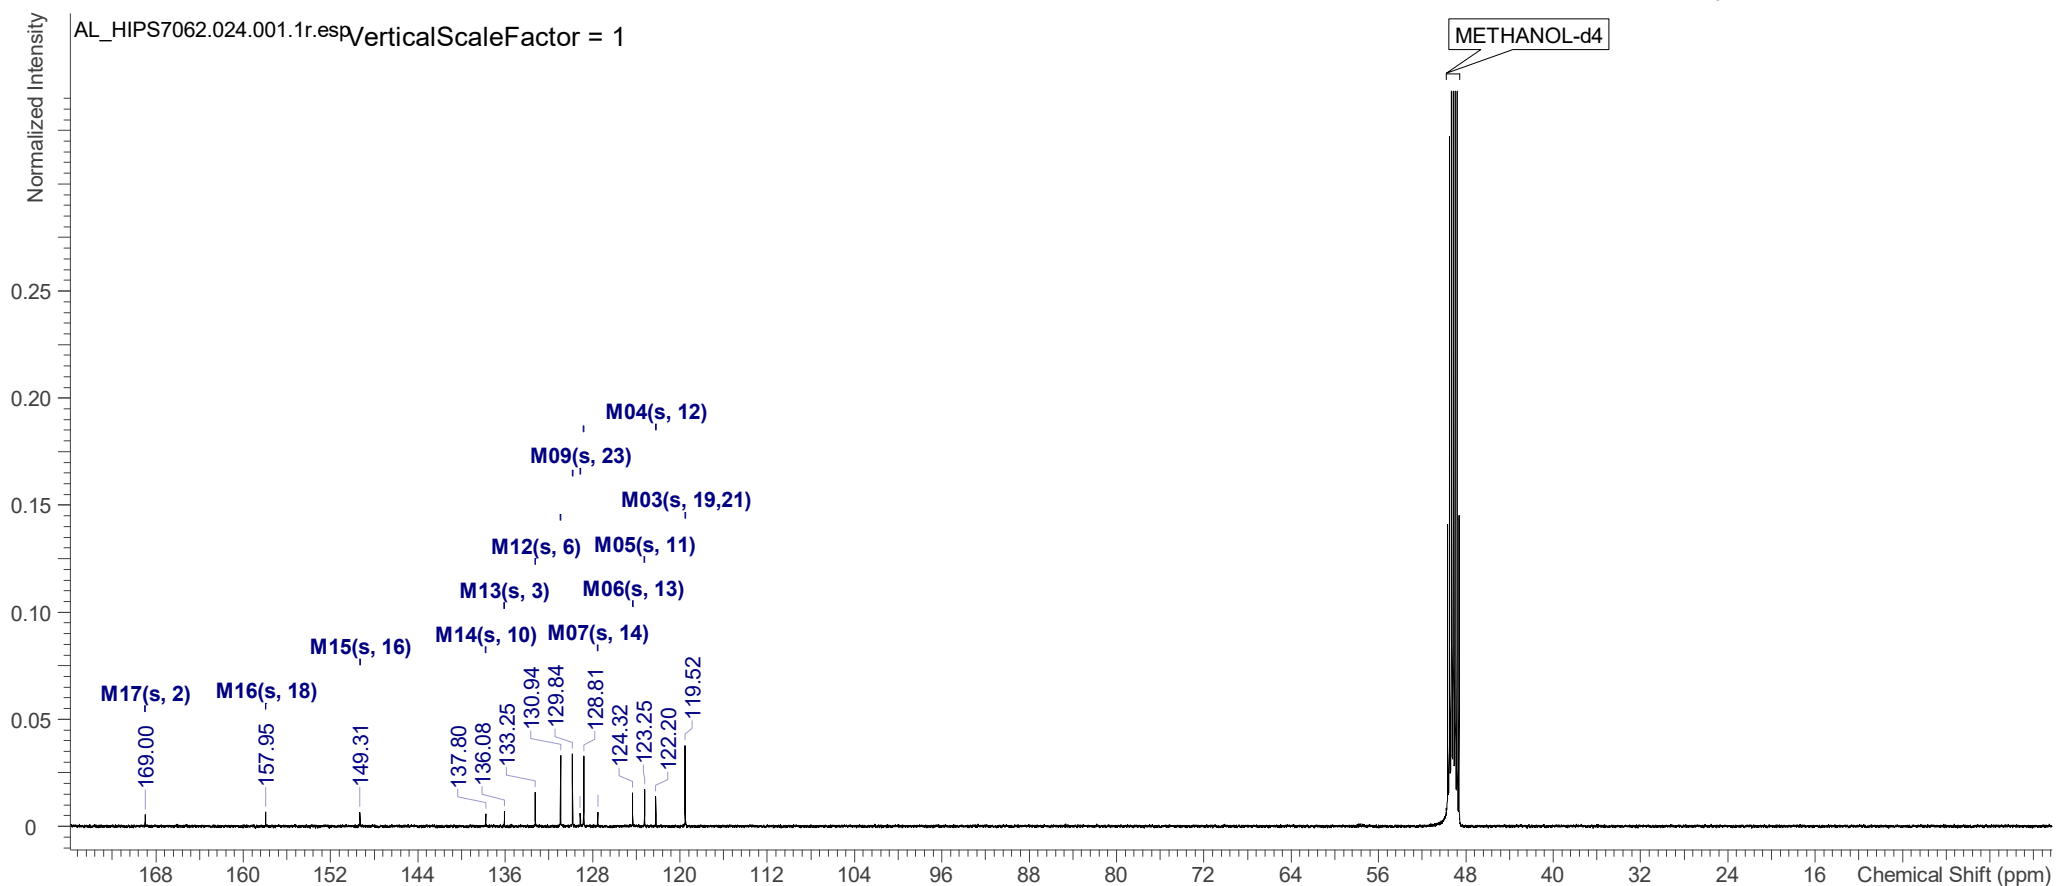

Compound 11

10/25/2023 9:42:16 AM

|                         |                                        |                                 |       |
|-------------------------|----------------------------------------|---------------------------------|-------|
| <b>Number of Nuclei</b> | 16 H's / 18 H's (spectrum / structure) | <b>Multiplets Integrals Sum</b> | 16.42 |
|-------------------------|----------------------------------------|---------------------------------|-------|

<sup>1</sup>H NMR (500 MHz, METHANOL-d<sub>4</sub>, ppm) δ= 7.93 (1 H, d, J = 2.59 Hz), 7.47 (1 H, dd, J = 8.85, 2.44 Hz), 7.38 – 7.25 (2 H, m), 7.07 (1 H, d, J = 8.85 Hz), 6.90 – 6.84 (2 H, m), 3.38 – 3.32 (2 H, m), 3.27 – 3.12 (2 H, m), 2.99 – 2.91 (1 H, m), 2.18 – 1.81 (4 H, m);

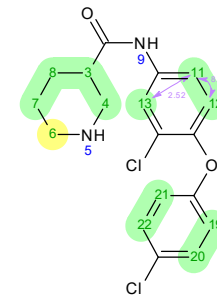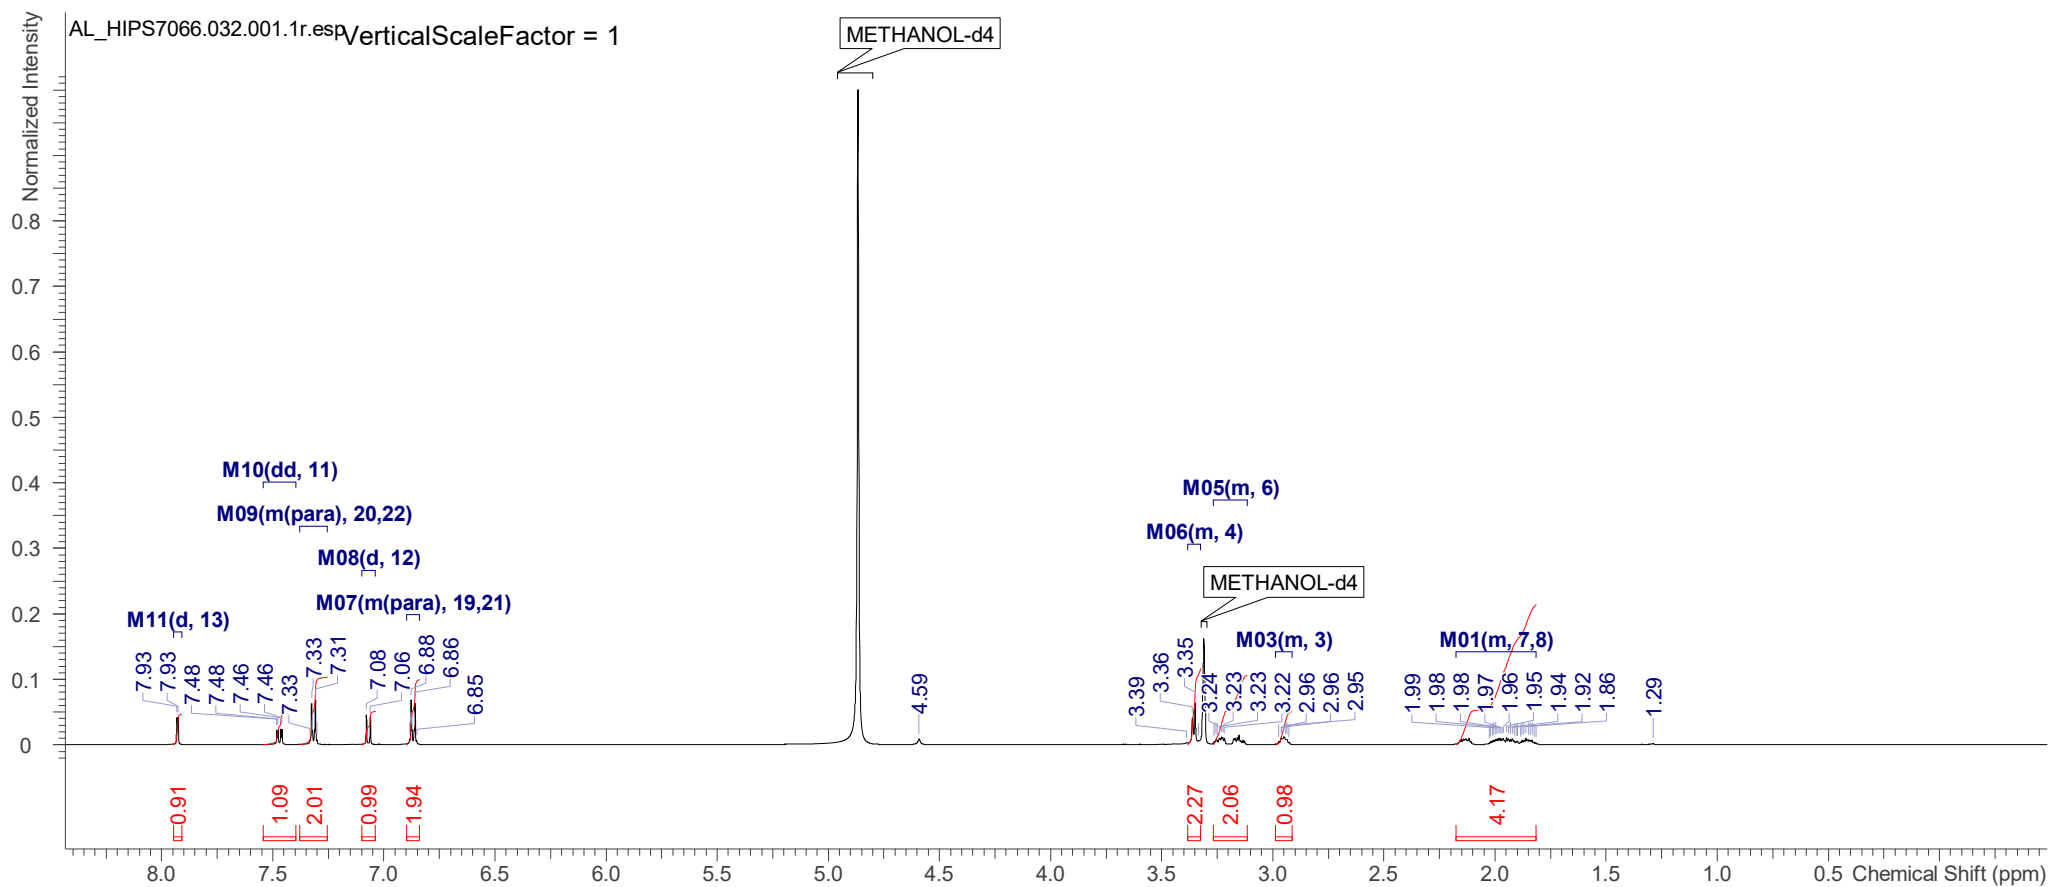

Compound 11

10/25/2023 9:42:20 AM

|                         |                                        |                                      |
|-------------------------|----------------------------------------|--------------------------------------|
| <b>Number of Nuclei</b> | 18 C's / 18 C's (spectrum / structure) | <b>Multiplets Integrals Sum</b> 0.00 |
|-------------------------|----------------------------------------|--------------------------------------|

<sup>13</sup>C NMR (126 MHz, METHANOL-d<sub>4</sub>, ppm) δ= 173.3 (1 C, s), 157.9 (1 C, s), 149.2 (1 C, s), 137.4 (1 C, s), 130.9 (2 C, s), 129.2 (1 C, s), 127.6 (1 C, s), 123.4 (1 C, s), 123.4 (1 C, s), 121.2 (1 C, s), 119.5 (2 C, s), 46.2 (1 C, s), 45.3 (1 C, s), 40.6 (1 C, s), 27.4 (1 C, s), 22.0 (1 C, s).

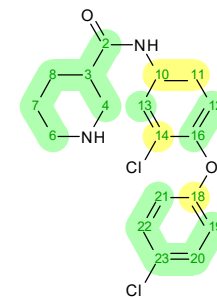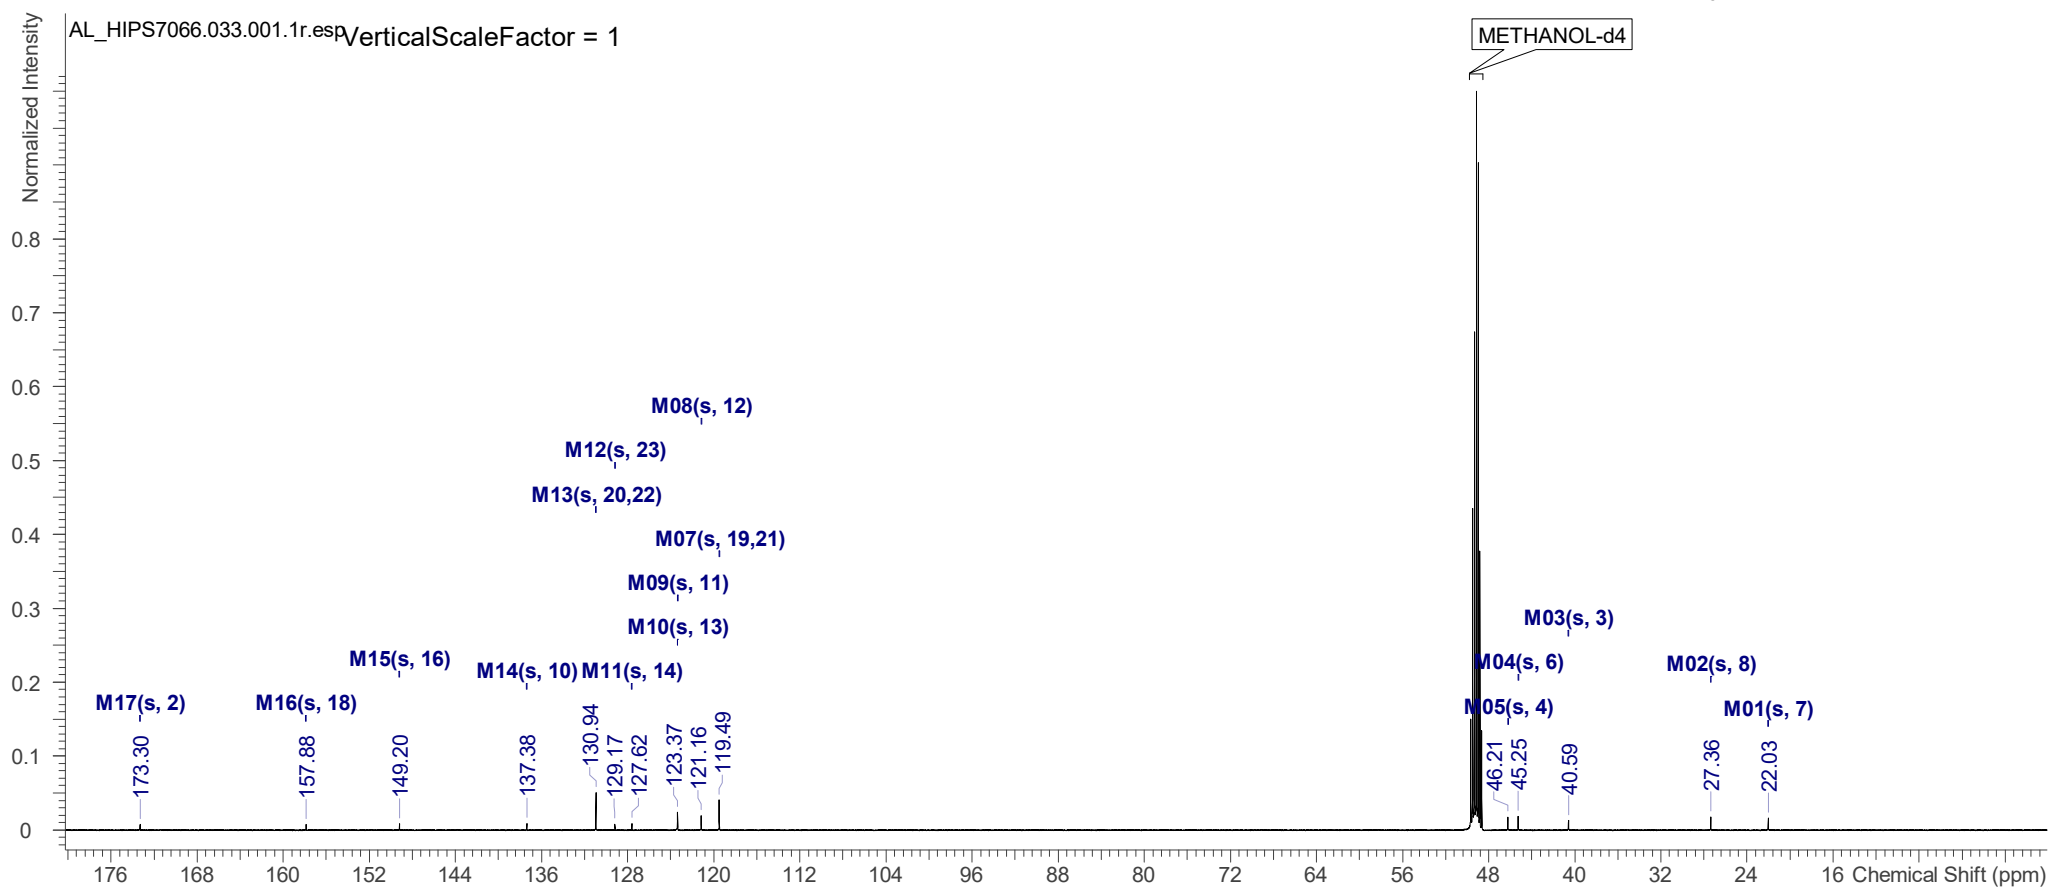

Compound 12

10/25/2023 9:51:34 AM

|                         |                                        |                                       |
|-------------------------|----------------------------------------|---------------------------------------|
| <b>Number of Nuclei</b> | 19 H's / 21 H's (spectrum / structure) | <b>Multiplets Integrals Sum</b> 17.53 |
|-------------------------|----------------------------------------|---------------------------------------|

<sup>1</sup>H NMR (500 MHz, METHANOL-d<sub>4</sub>, ppm) δ= 7.91 (1 H, d, J = 2.29 Hz), 7.46 (1 H, dd, J = 8.77, 2.37 Hz), 7.33 – 7.29 (2 H, m), 7.06 (1 H, d, J = 8.70 Hz), 6.90 – 6.83 (2 H, m), 3.52 – 3.42 (2 H, m), 3.30 – 3.21 (3 H, m), 2.87 – 2.78 (1 H, m), 2.24 – 2.05 (4 H, m), 2.00 – 1.88 (2 H, m);

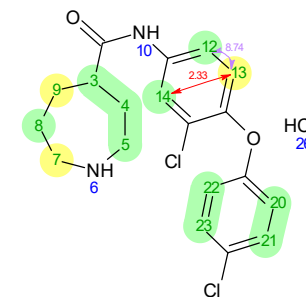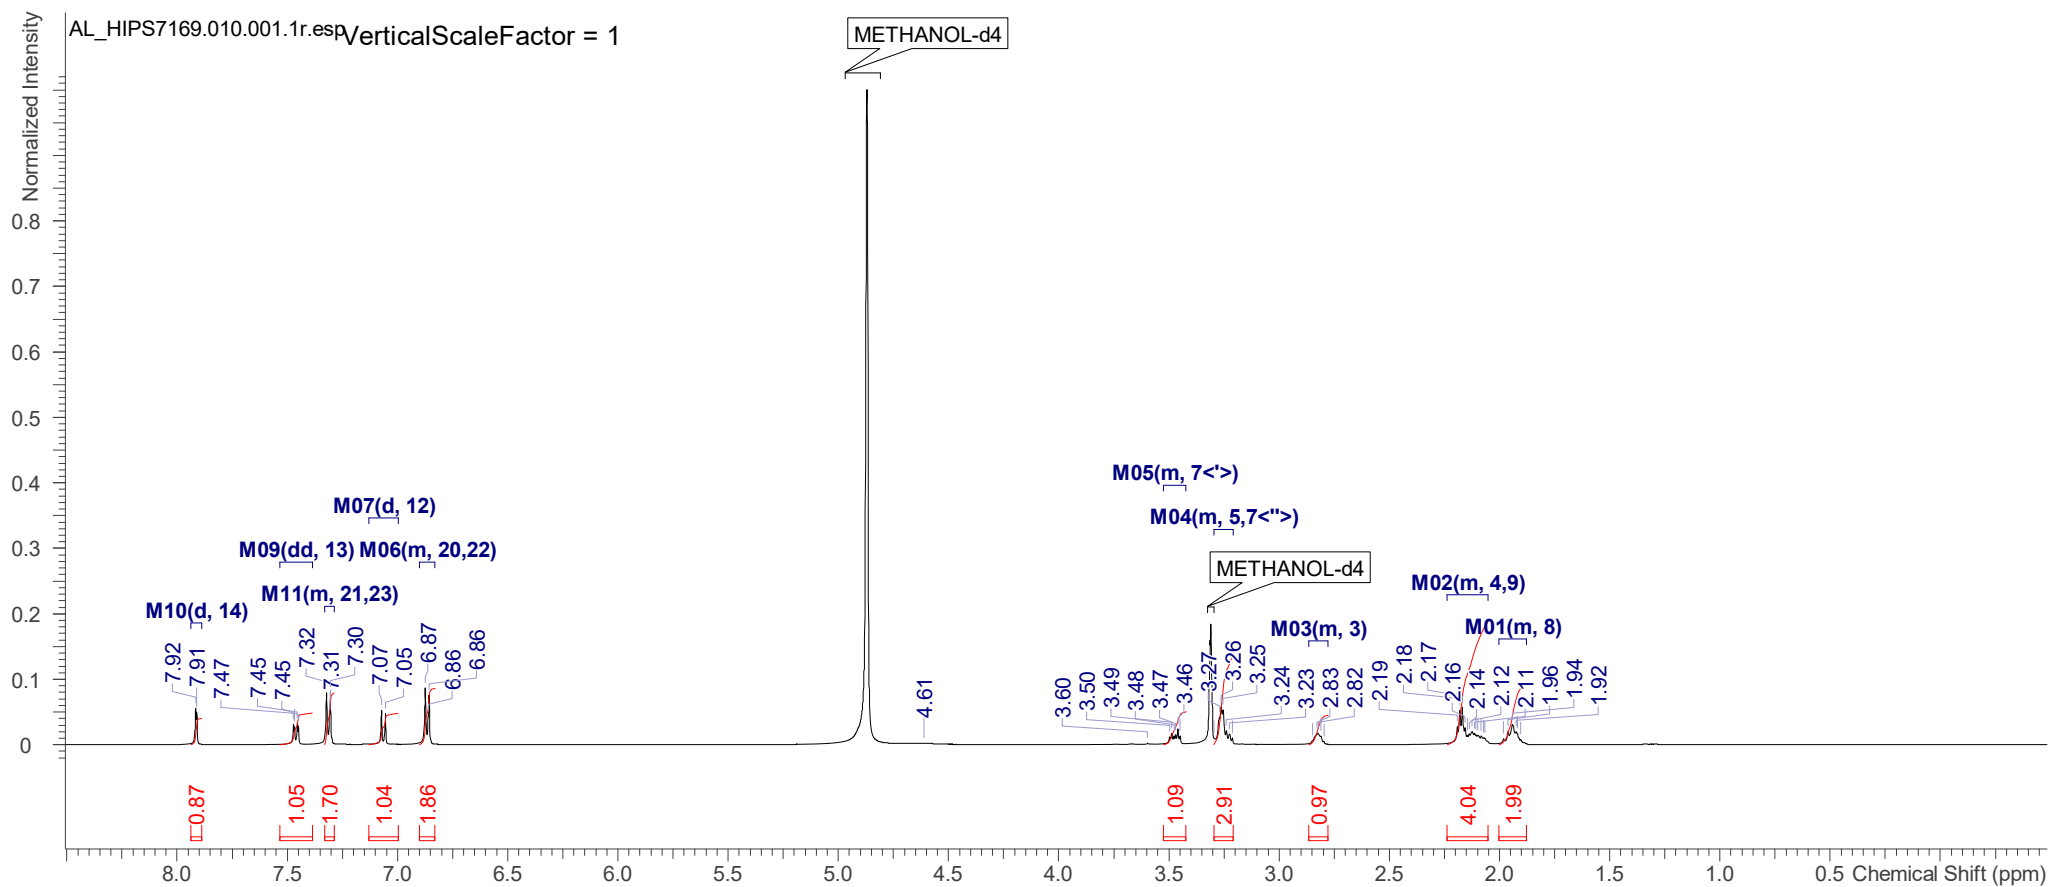

Compound 12

10/25/2023 9:51:37 AM

|                         |                                        |                                      |
|-------------------------|----------------------------------------|--------------------------------------|
| <b>Number of Nuclei</b> | 19 C's / 19 C's (spectrum / structure) | <b>Multiplets Integrals Sum</b> 0.00 |
|-------------------------|----------------------------------------|--------------------------------------|

<sup>13</sup>C NMR (126 MHz, METHANOL-d<sub>4</sub>, ppm) δ= 176.2 (1 C, s), 157.9 (1 C, s), 149.1 (1 C, s), 137.6 (1 C, s), 130.9 (2 C, s), 129.1 (1 C, s), 127.6 (1 C, s), 123.4 (1 C, s), 123.4 (1 C, s), 121.2 (1 C, s), 119.5 (2 C, s), 48.0 (1 C, s), 46.0 (1 C, s), 45.4 (1 C, s), 31.2 (1 C, s), 28.7 (1 C, s), 24.4 (1 C, s).

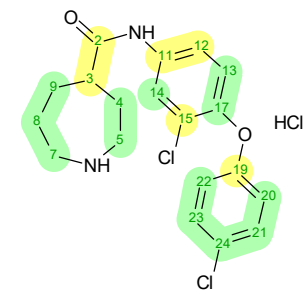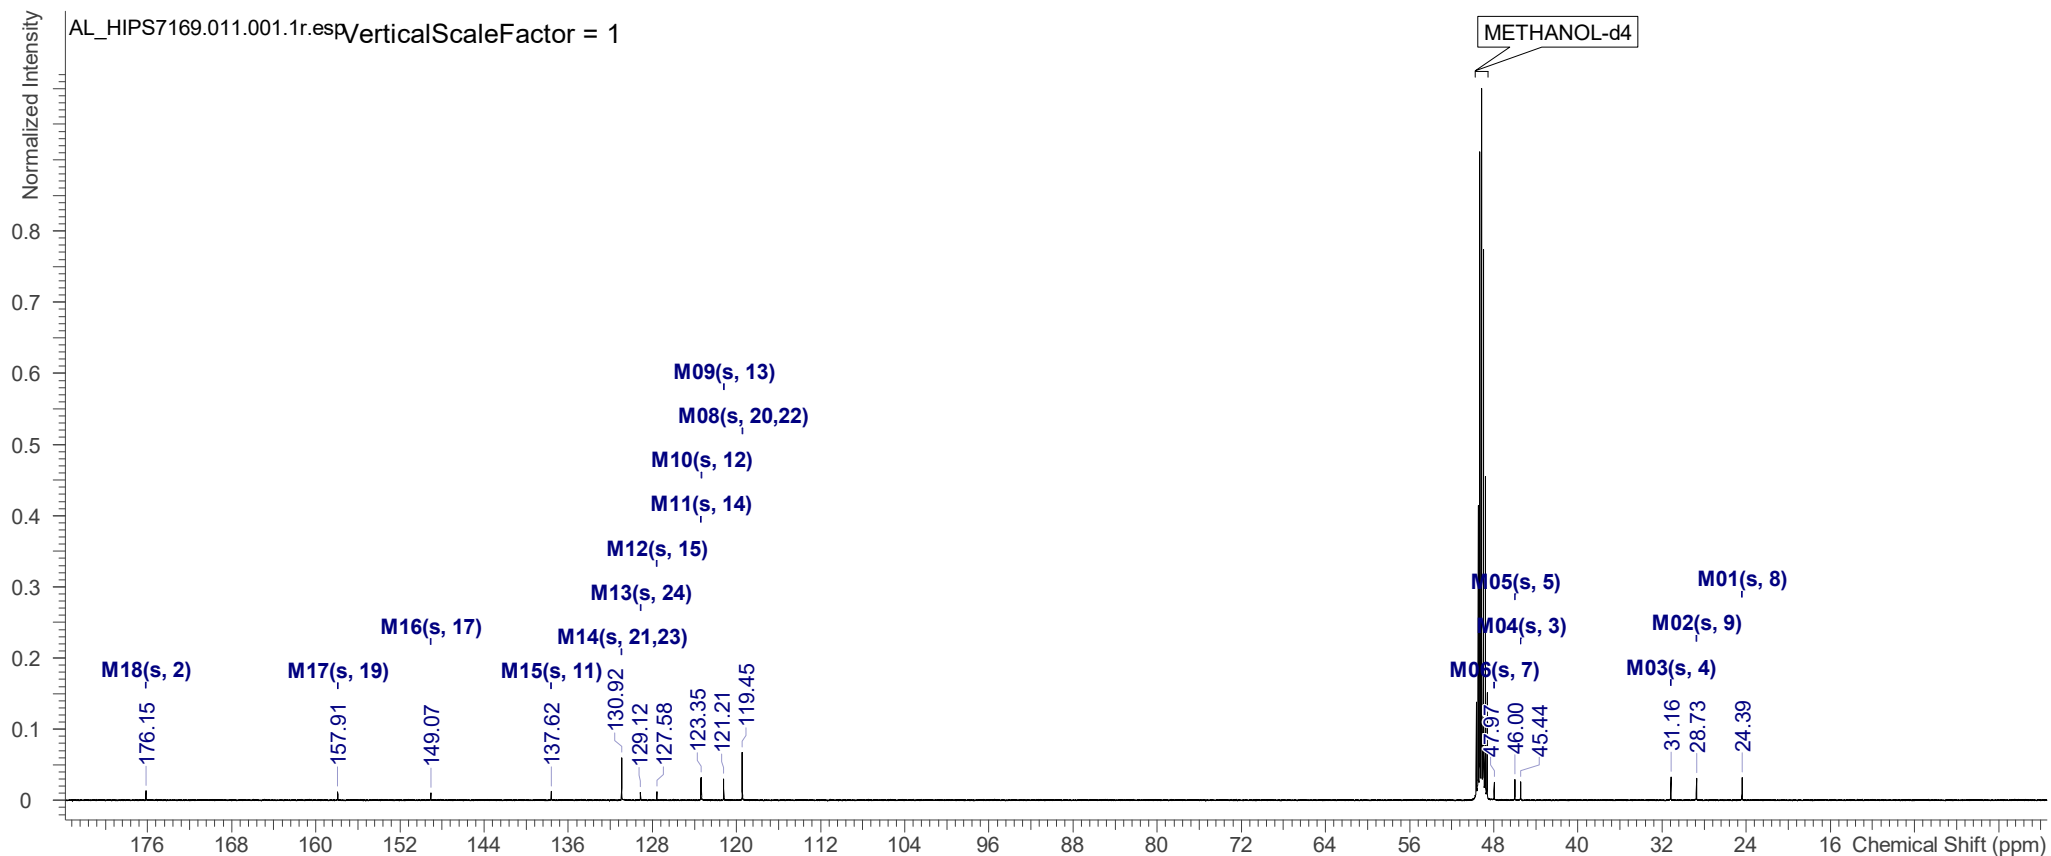

Compound 13

24.05.2024 16:58:35

|                                       |                                                                |
|---------------------------------------|----------------------------------------------------------------|
| <b>Multiplets Integrals Sum</b> 21.66 | <b>Number of Nuclei</b> 20 H's / 20 H's (spectrum / structure) |
|---------------------------------------|----------------------------------------------------------------|

<sup>1</sup>H NMR (500 MHz, CHLOROFORM-d, ppm) δ= 8.64 (br s, 1 H), 7.78 (d, J = 1.22 Hz, 1 H), 7.49 – 7.41 (m, 1 H), 7.26 – 7.23 (m, 3 H), 6.93 (d, J = 8.70 Hz, 1 H), 6.81 (d, J = 8.85 Hz, 2 H), 3.37 (br s, 2 H), 2.88 (br s, 2 H), 2.42 – 2.33 (m, 2 H), 2.21 (br s, 1 H), 1.93 (br d, 2 H), 1.61 (br s, 2 H);

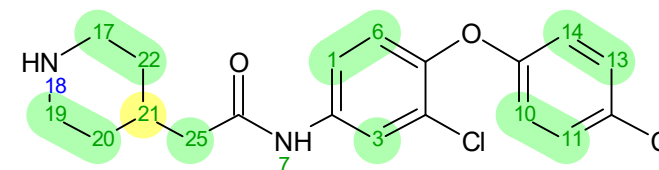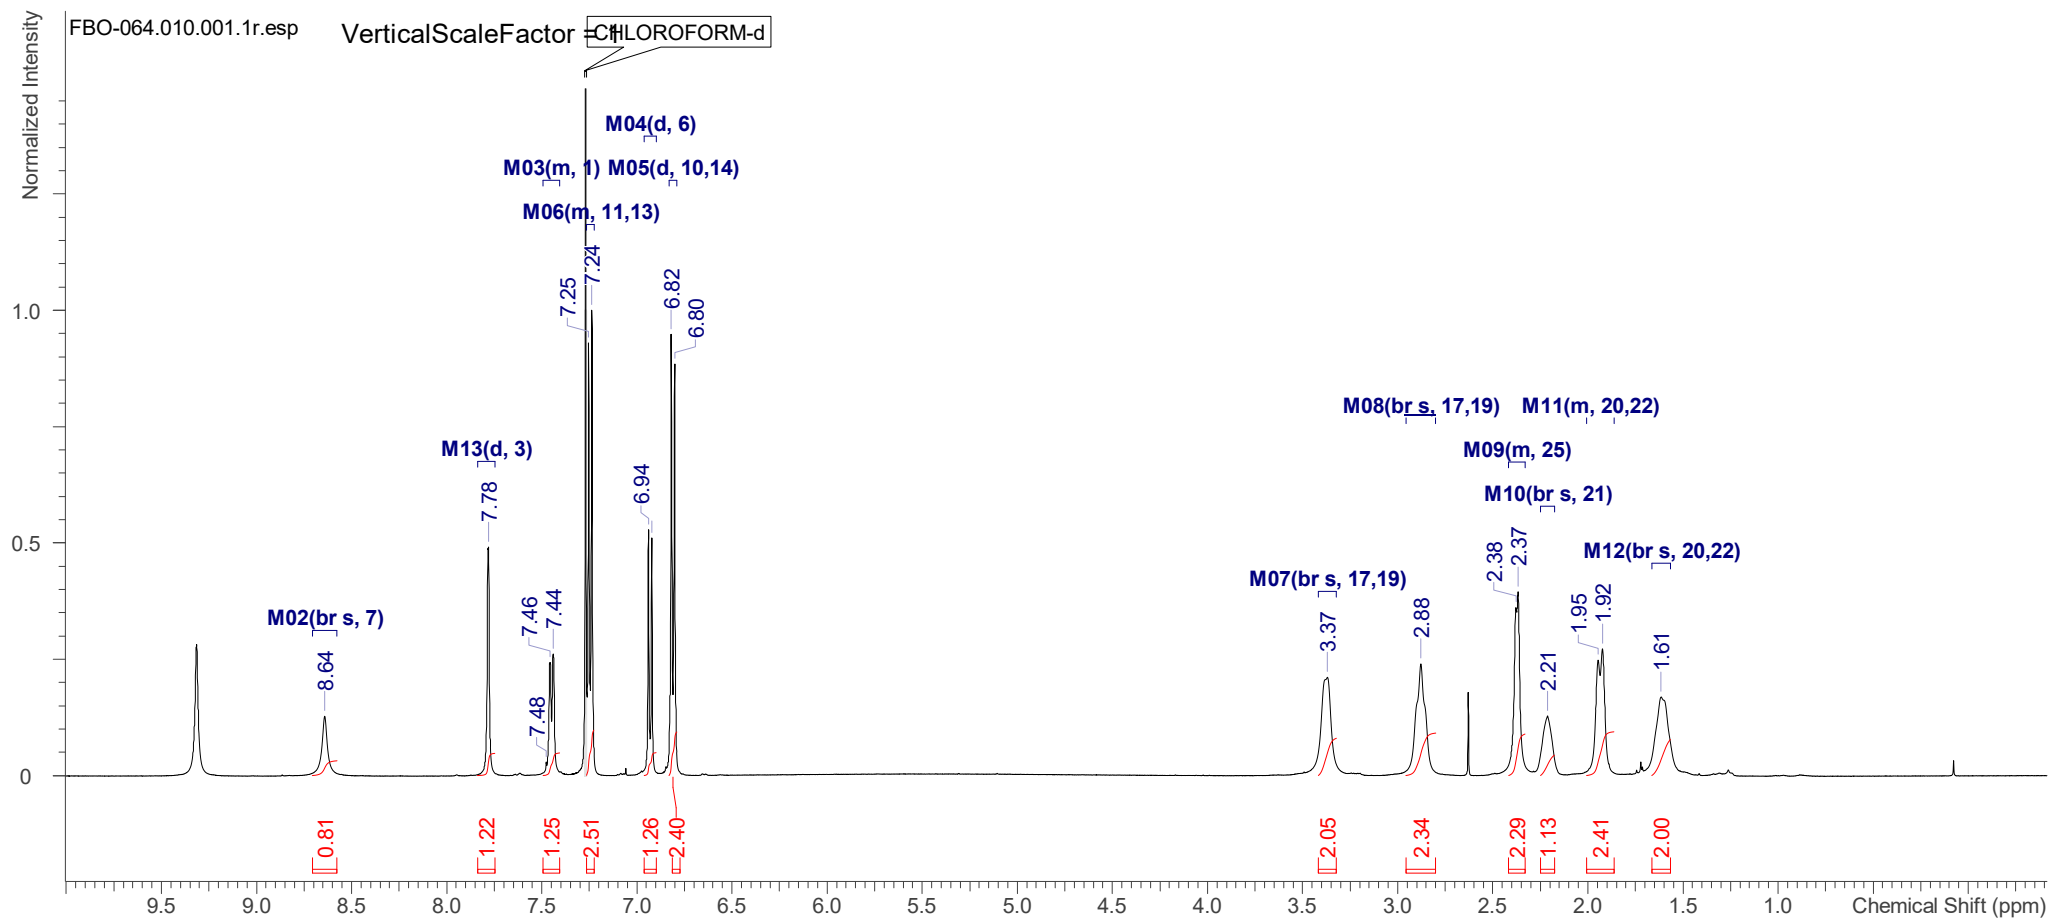

Compound 13

24.05.2024 16:58:41

|                         |                                        |                                        |
|-------------------------|----------------------------------------|----------------------------------------|
| <b>Number of Nuclei</b> | 19 C's / 19 C's (spectrum / structure) | <b>Multiplets Integrals Sum</b> 204.73 |
|-------------------------|----------------------------------------|----------------------------------------|

<sup>13</sup>C NMR (126 MHz, CHLOROFORM-d, ppm) δ= 169.8 (s, 1 C), 155.9 (s, 1 C), 147.9 (s, 1 C), 135.4 (s, 1 C), 129.7 (s, 2 C), 128.1 (s, 1 C), 126.3 (s, 1 C), 122.2 (s, 1 C), 121.7 (s, 1 C), 119.7 (s, 1 C), 118.4 (s, 2 C), 43.7 (s, 2 C), 43.1 (s, 1 C), 31.4 (s, 1 C), 28.6 (s, 2 C).

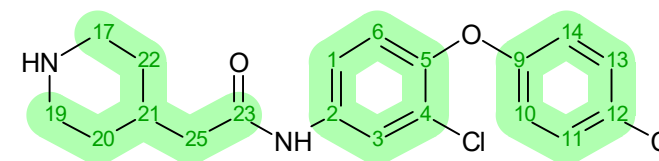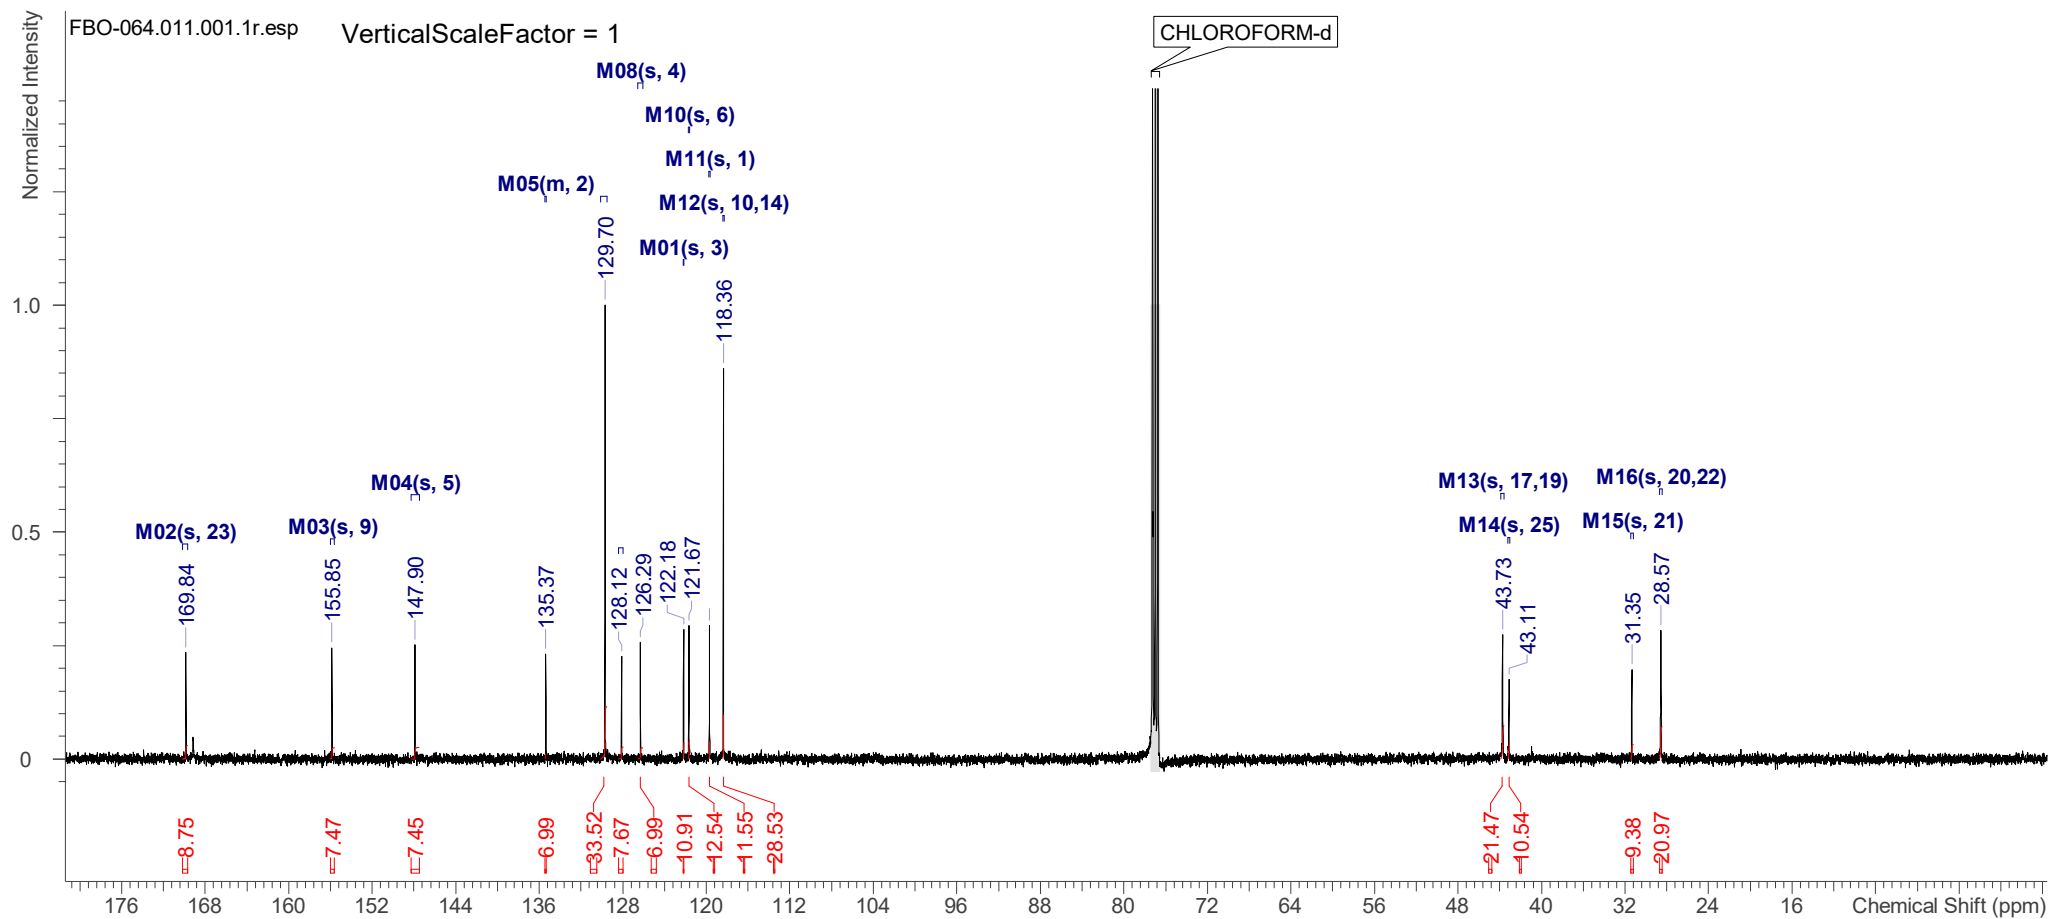

## Compound 14

4/4/2024 8:44:36 AM

Number of Nuclei 22 H's / 22 H's (spectrum / structure)

Multiplets Integrals Sum 21.49

$^1\text{H}$  NMR (500 MHz, CHLOROFORM-*d*, ppm)  $\delta$ = 9.65 – 9.11 (1 H, m), 8.49 (1 H, br s), 7.77 (1 H, s), 7.40 (1 H, br d,  $J$  = 8.70 Hz), 7.25 (2 H, d,  $J$  = 8.70 Hz), 6.94 (1 H, d,  $J$  = 8.85 Hz), 6.82 (2 H, d,  $J$  = 8.70 Hz), 3.39 (2 H, m), 2.86 (2 H, m), 2.40 (2 H, m), 1.88 (2 H, m), 1.74 (2 H, m), 1.70 – 1.53 (3 H, m);

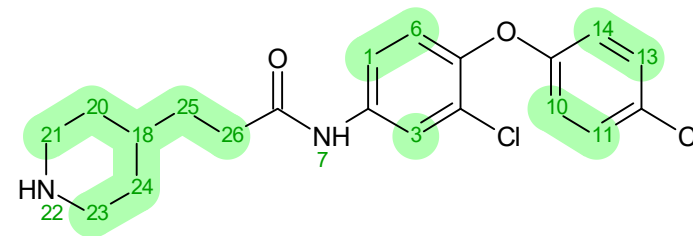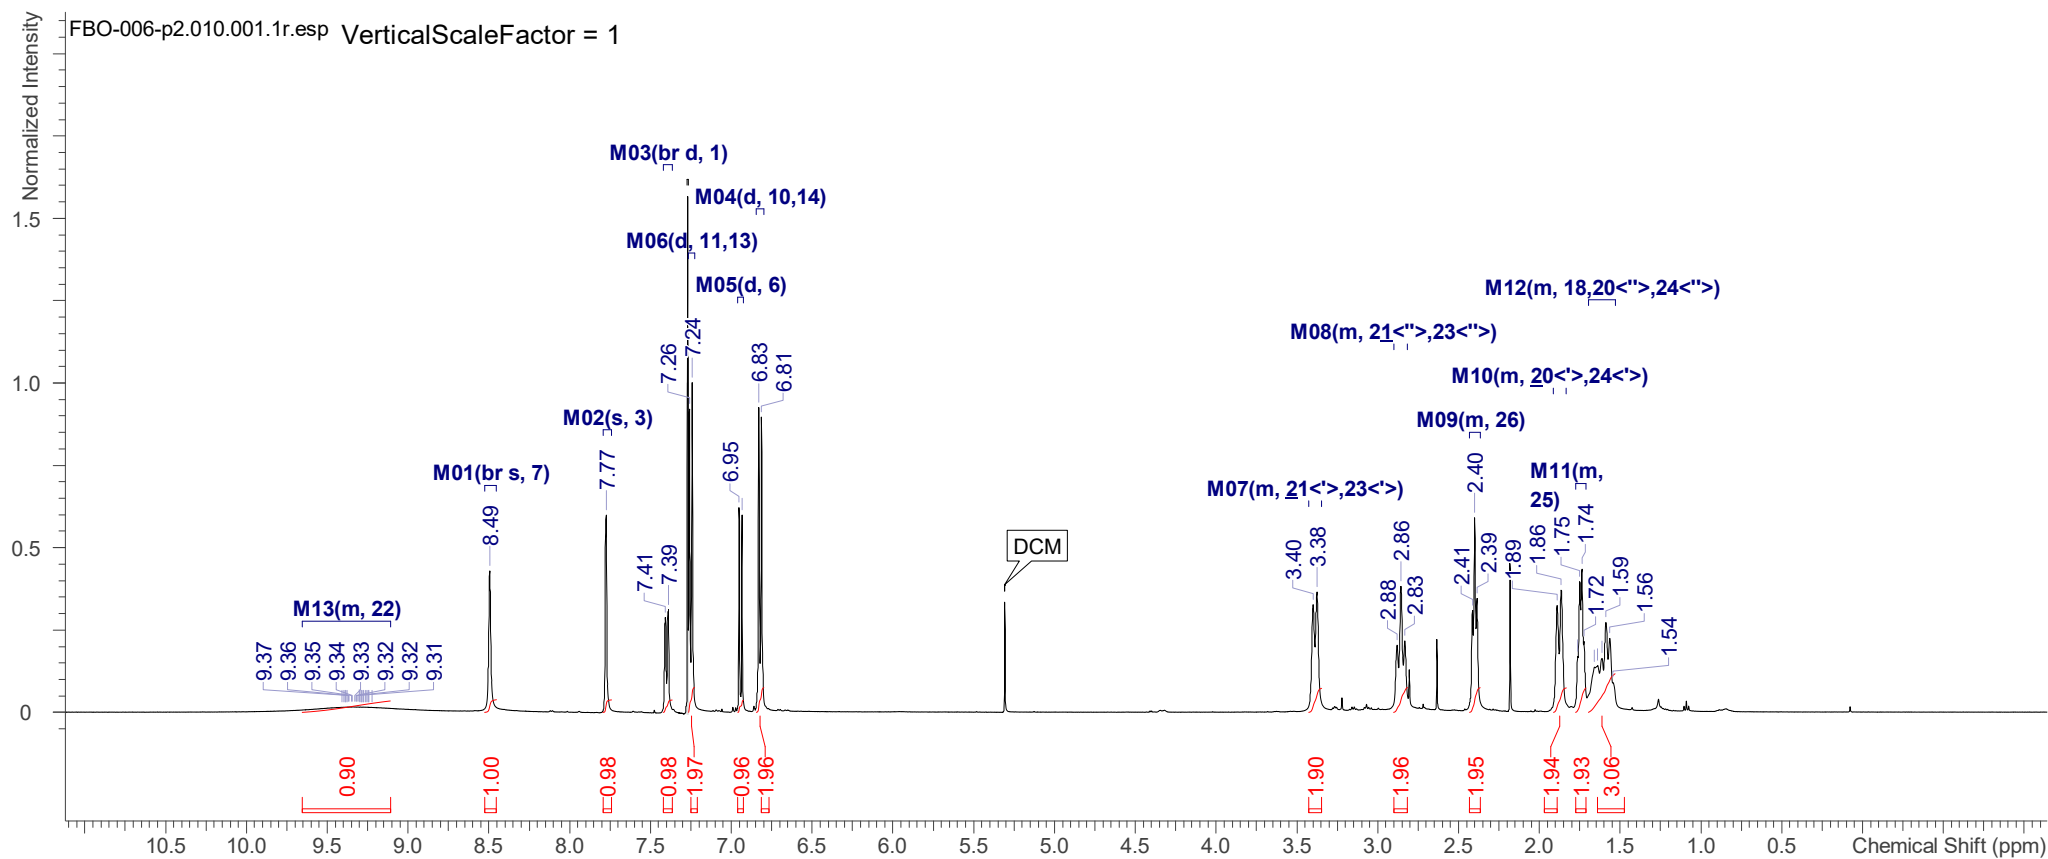

FBO-006-p2.010.001.1r.esp

Compound 14

4/4/2024 8:44:41 AM

|                  |                                        |                          |       |
|------------------|----------------------------------------|--------------------------|-------|
| Number of Nuclei | 20 C's / 20 C's (spectrum / structure) | Multiplets Integrals Sum | 18.76 |
|------------------|----------------------------------------|--------------------------|-------|

<sup>13</sup>C NMR (126 MHz, CHLOROFORM-*d*, ppm)  $\delta$  = 171.3 (1 C, s), 155.9 (1 C, s), 147.9 (1 C, s), 135.3 (1 C, s), 129.7 (2 C, s), 128.1 (1 C, s), 126.3 (1 C, s), 122.2 (1 C, s), 121.7 (1 C, s), 119.6 (1 C, s), 118.4 (2 C, s), 44.1 (2 C, s), 33.5 (1 C, s), 33.3 (1 C, s), 31.0 (1 C, s), 28.2 (2 C, s).

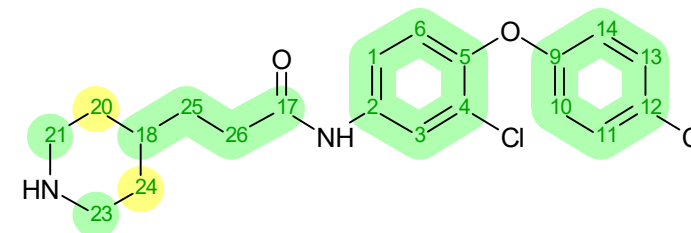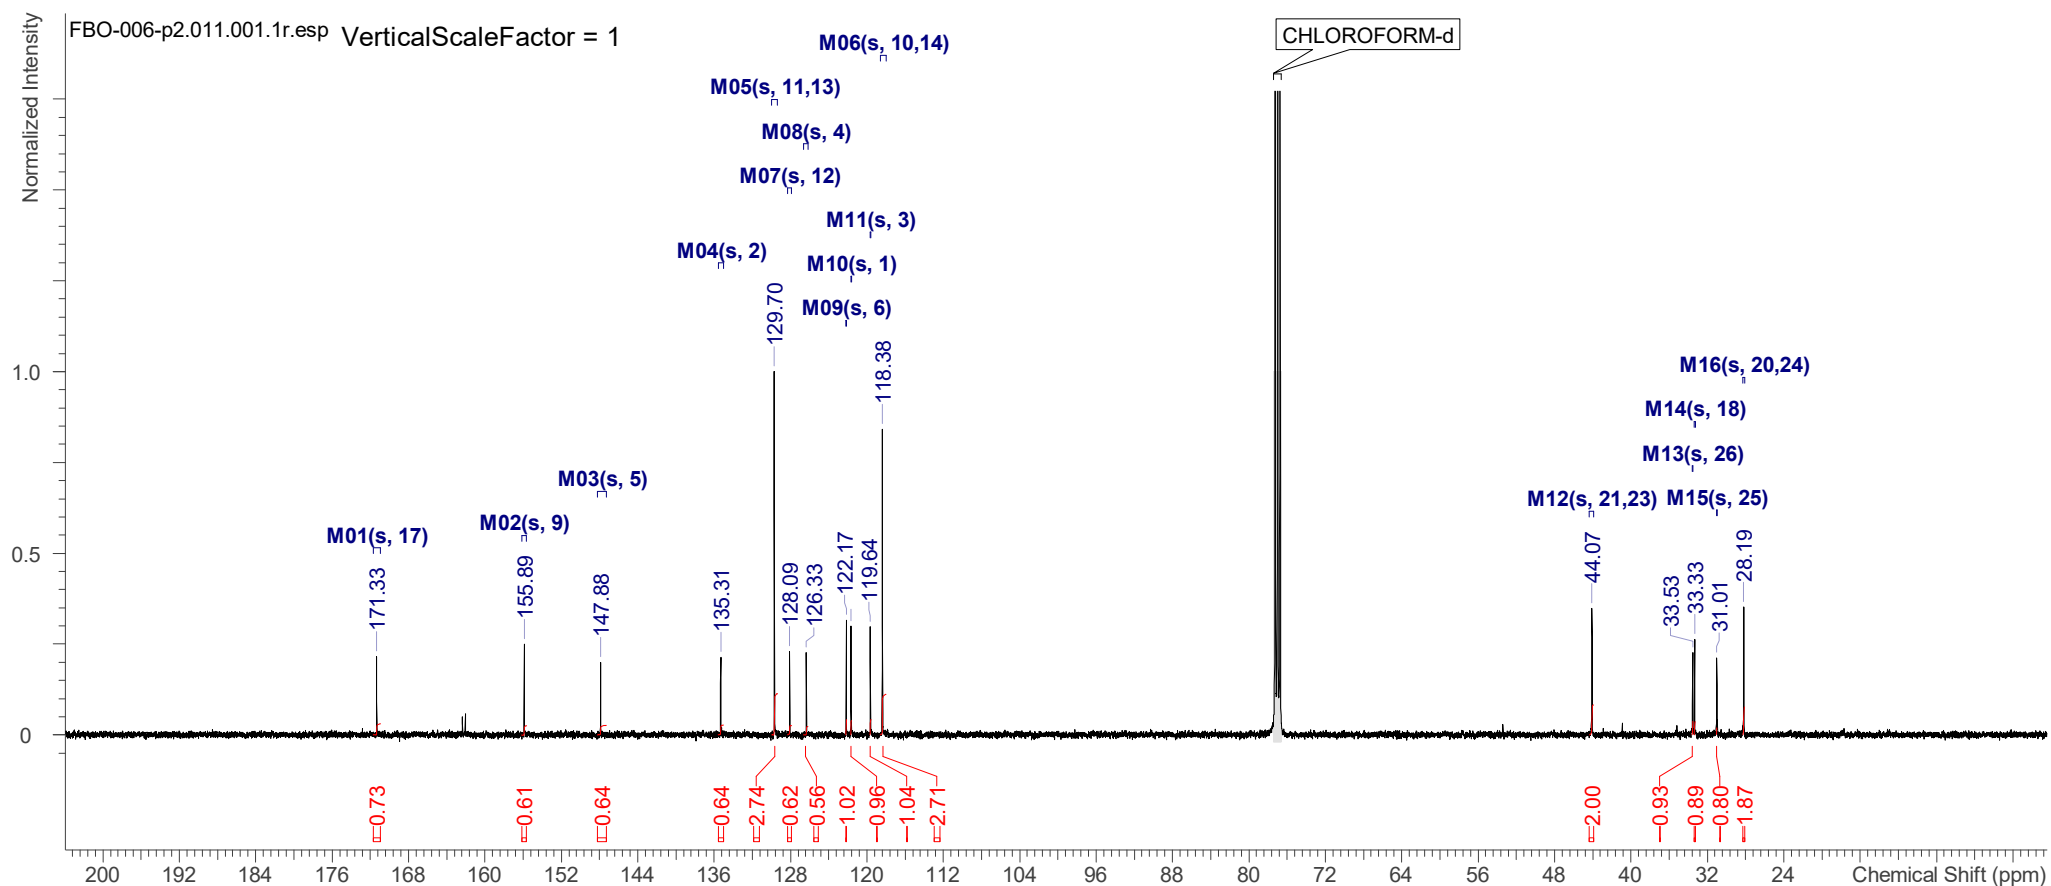

## Compound 15

4/3/2024 4:13:05 PM

Number of Nuclei 7 H's / 11 H's (spectrum / structure)

Multiplets Integrals Sum 6.81

$^1\text{H}$  NMR (500 MHz, METHANOL- $d_4$ , ppm)  $\delta$ = 8.51 (1 H, s), 7.89 (1 H, d,  $J$  = 2.14 Hz), 7.54 (1 H, dd,  $J$  = 8.77, 2.21 Hz), 7.32 (1 H, d,  $J$  = 9.00 Hz), 7.07 (1 H, d,  $J$  = 8.85 Hz), 6.88 (1 H, d,  $J$  = 8.85 Hz), 4.59 (1 H, br s);

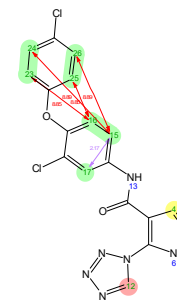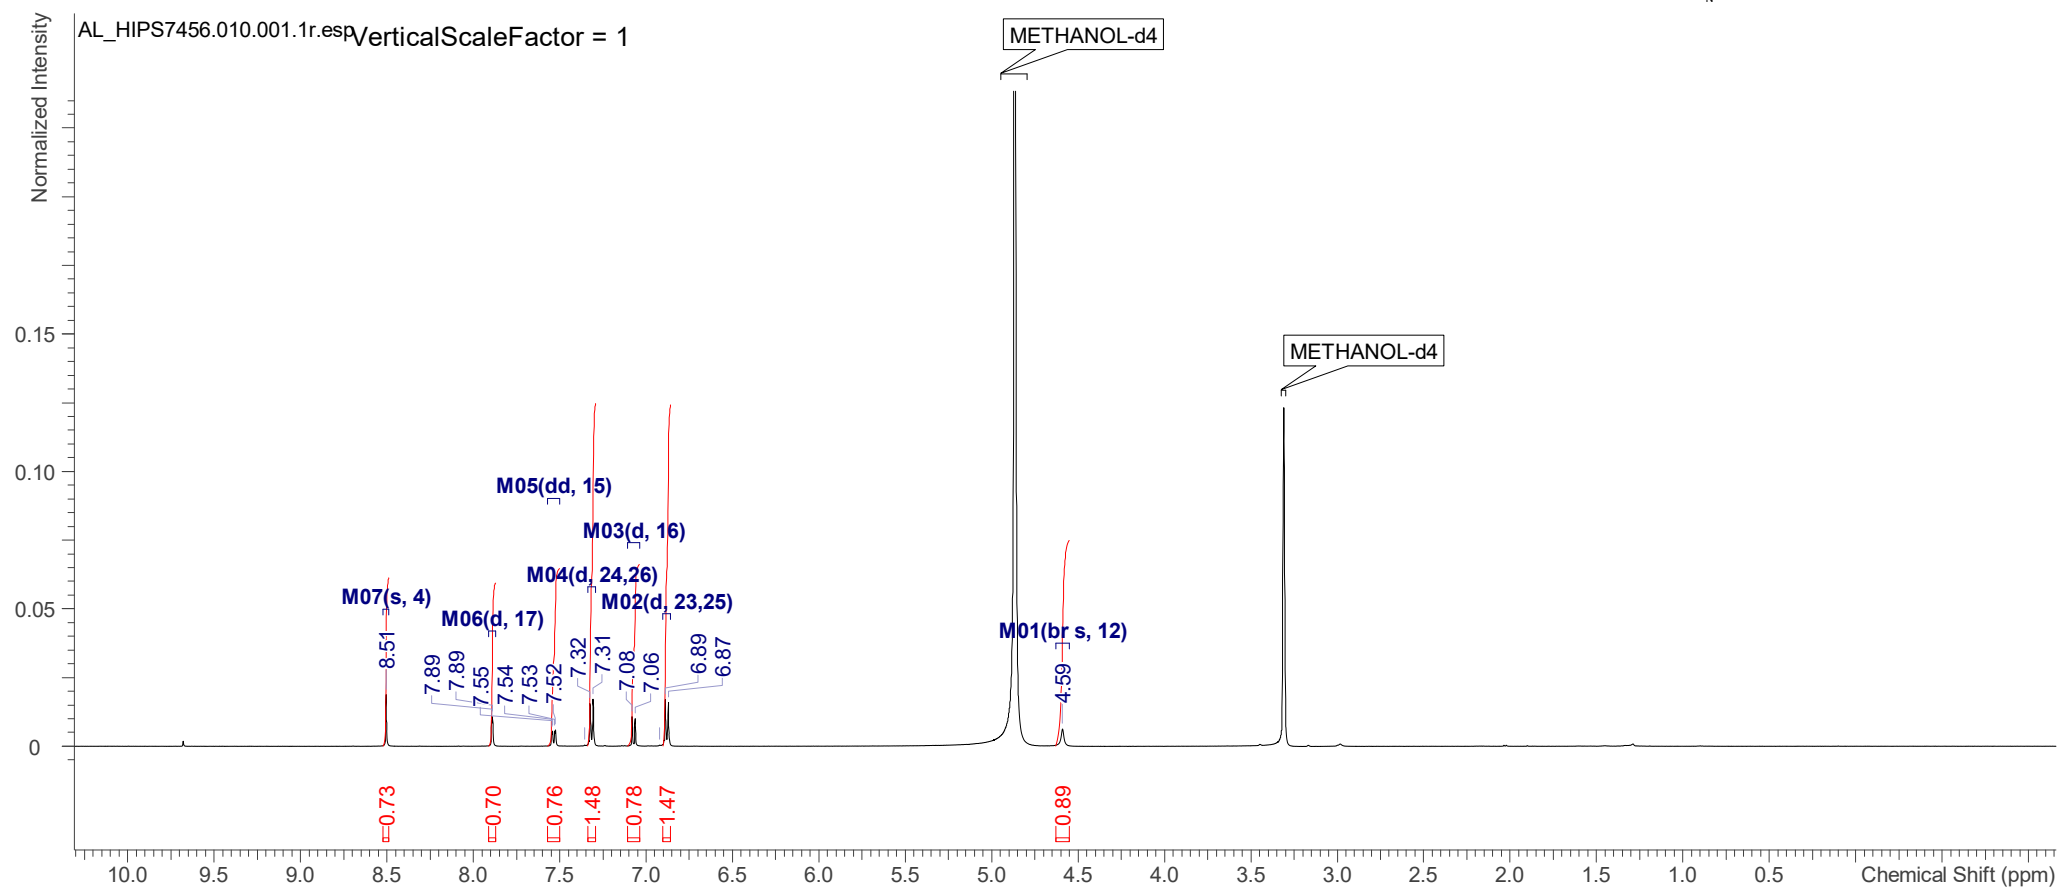

AL\_HIPS7456.010.001.1r.esp

Multiplets Integrals Sum 6.73 Number of Nuclei 17 C's / 17 C's (spectrum / structure)

$^{13}\text{C}$  NMR (126 MHz, METHANOL- $d_4$ , ppm)  $\delta$ = 161.7 (1 C, br s), 157.9 (1 C, s), 149.2 (1 C, s), 145.9 (1 C, s), 143.1 (1 C, br s), 137.4 (1 C, s), 134.3 (1 C, br s), 130.9 (2 C, s), 129.1 (1 C, s), 127.5 (1 C, s), 123.9 (1 C, s), 123.3 (1 C, s), 121.8 (1 C, s), 119.5 (2 C, s), 111.7 (1 C, s).

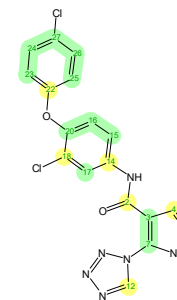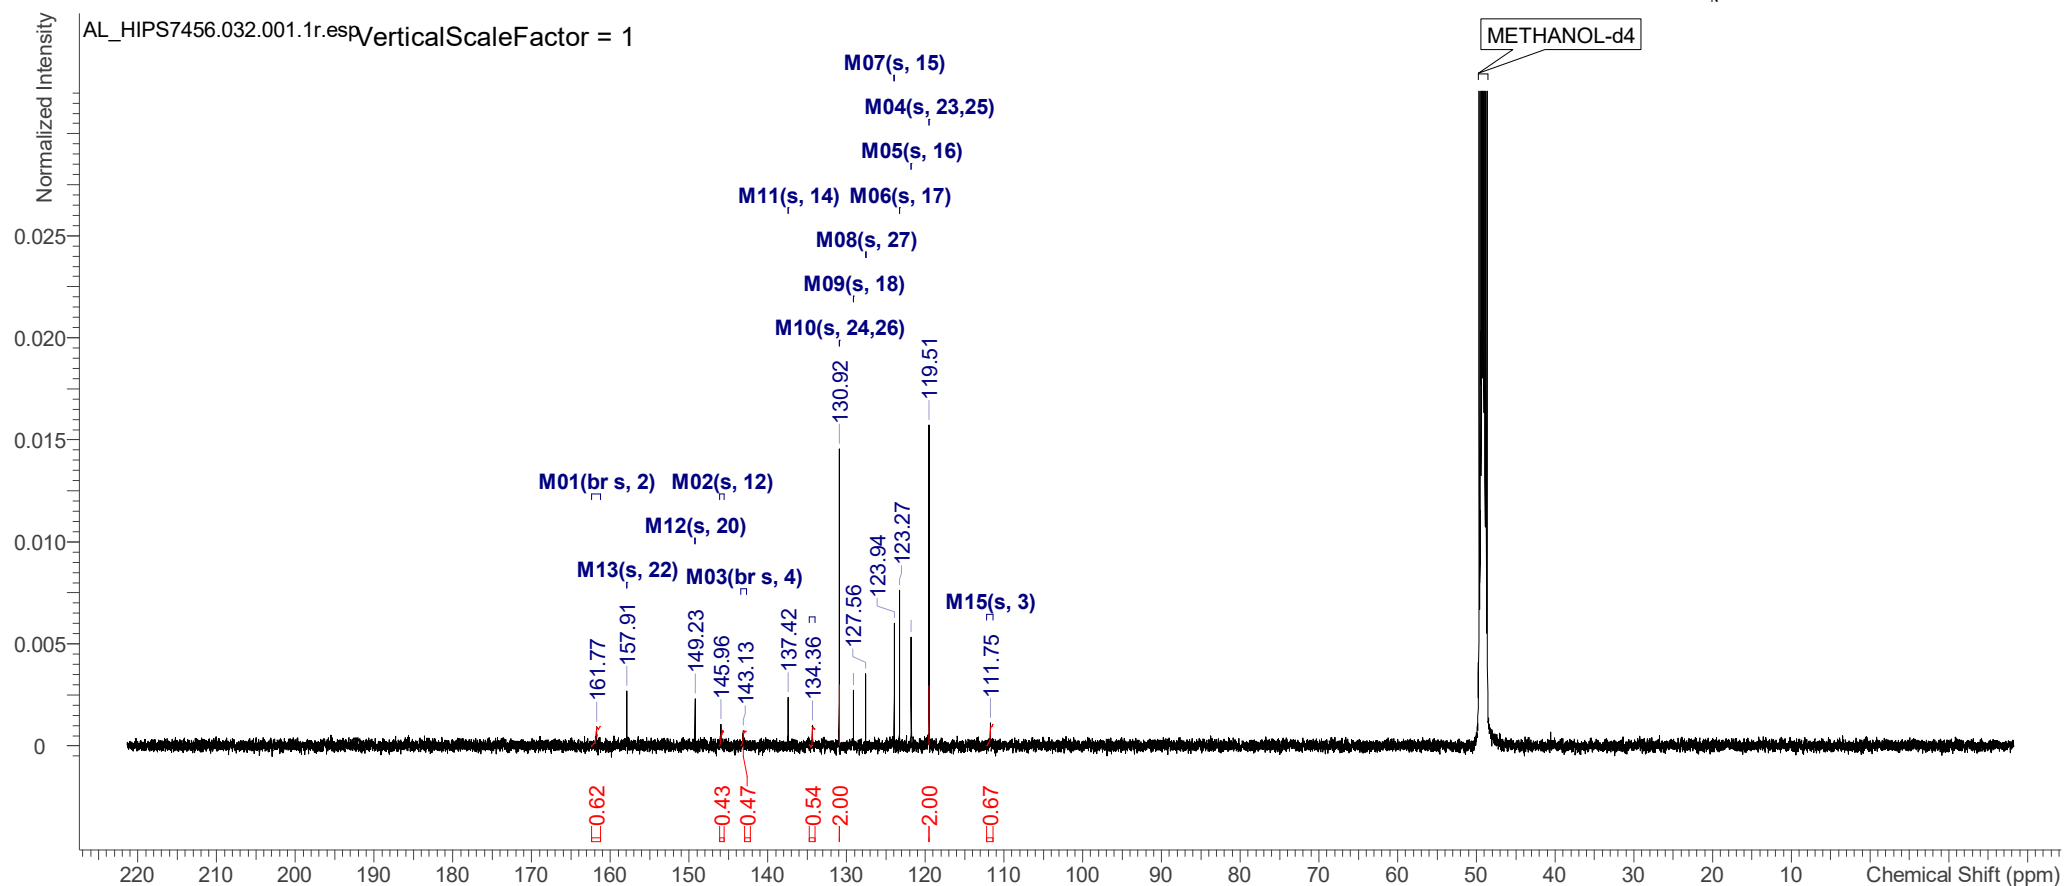

Compound 18

5/10/2022 7:56:03 AM

|                         |                                        |                                       |
|-------------------------|----------------------------------------|---------------------------------------|
| <b>Number of Nuclei</b> | 10 H's / 10 H's (spectrum / structure) | <b>Multiplets Integrals Sum</b> 10.17 |
|-------------------------|----------------------------------------|---------------------------------------|

<sup>1</sup>H NMR (500 MHz, CHLOROFORM-d, ppm) δ= 8.14 (1 H, d, J = 1.98 Hz), 7.86 (1 H, dd, J = 8.62, 2.06 Hz), 7.36 – 7.32 (2 H, m), 7.00 – 6.94 (2 H, m), 6.89 (1 H, d, J = 8.54 Hz), 3.91 (3 H, s);

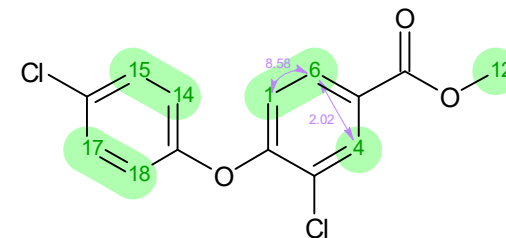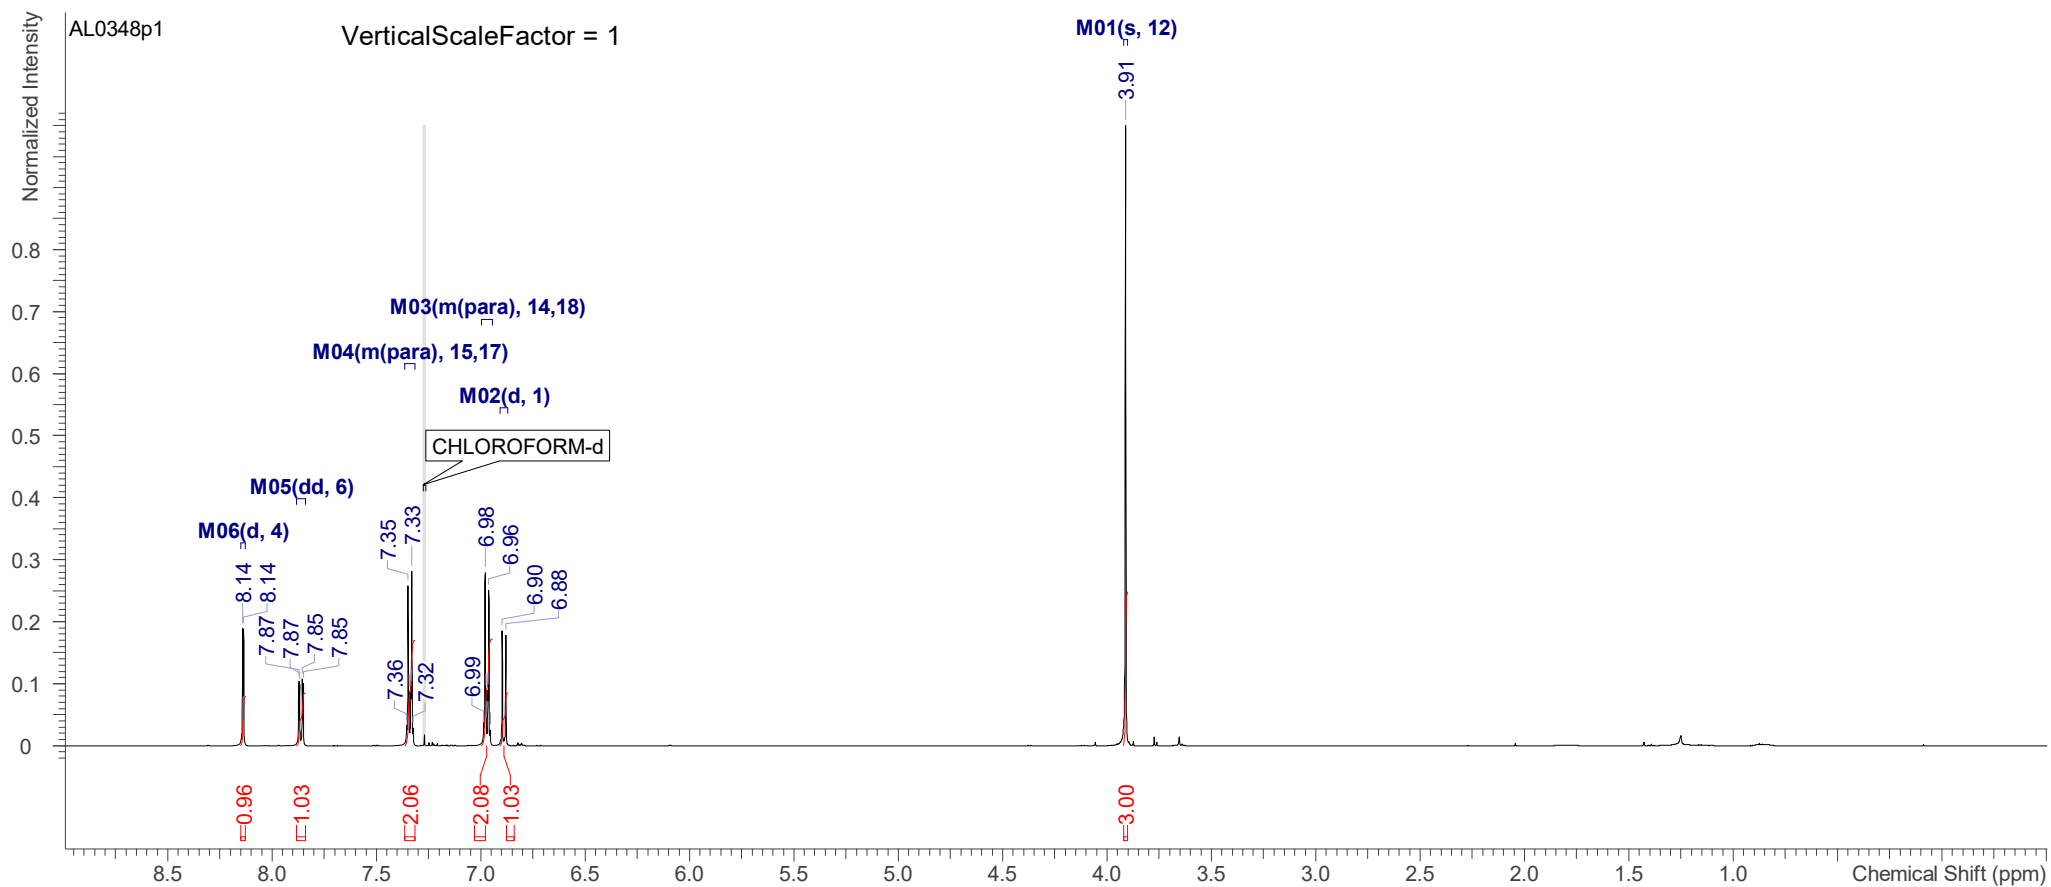

AL0348p1

Compound 18

5/10/2022 7:56:09 AM

|                         |                                        |                                      |
|-------------------------|----------------------------------------|--------------------------------------|
| <b>Number of Nuclei</b> | 14 C's / 14 C's (spectrum / structure) | <b>Multiplets Integrals Sum</b> 0.00 |
|-------------------------|----------------------------------------|--------------------------------------|

<sup>13</sup>C NMR (126 MHz, CHLOROFORM-d, ppm) δ= 165.3 (1 C, s), 156.5 (1 C, s), 154.0 (1 C, s), 132.3 (1 C, s), 130.0 (2 C, s), 129.7 (1 C, s), 129.5 (1 C, s), 126.1 (1 C, s), 124.8 (1 C, s), 120.5 (2 C, s), 118.9 (1 C, s), 52.3 (1 C, s)

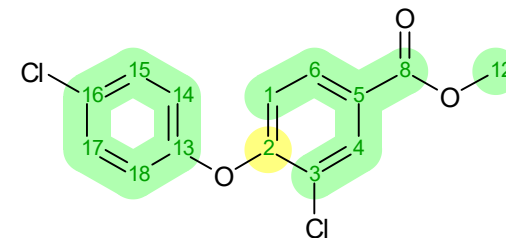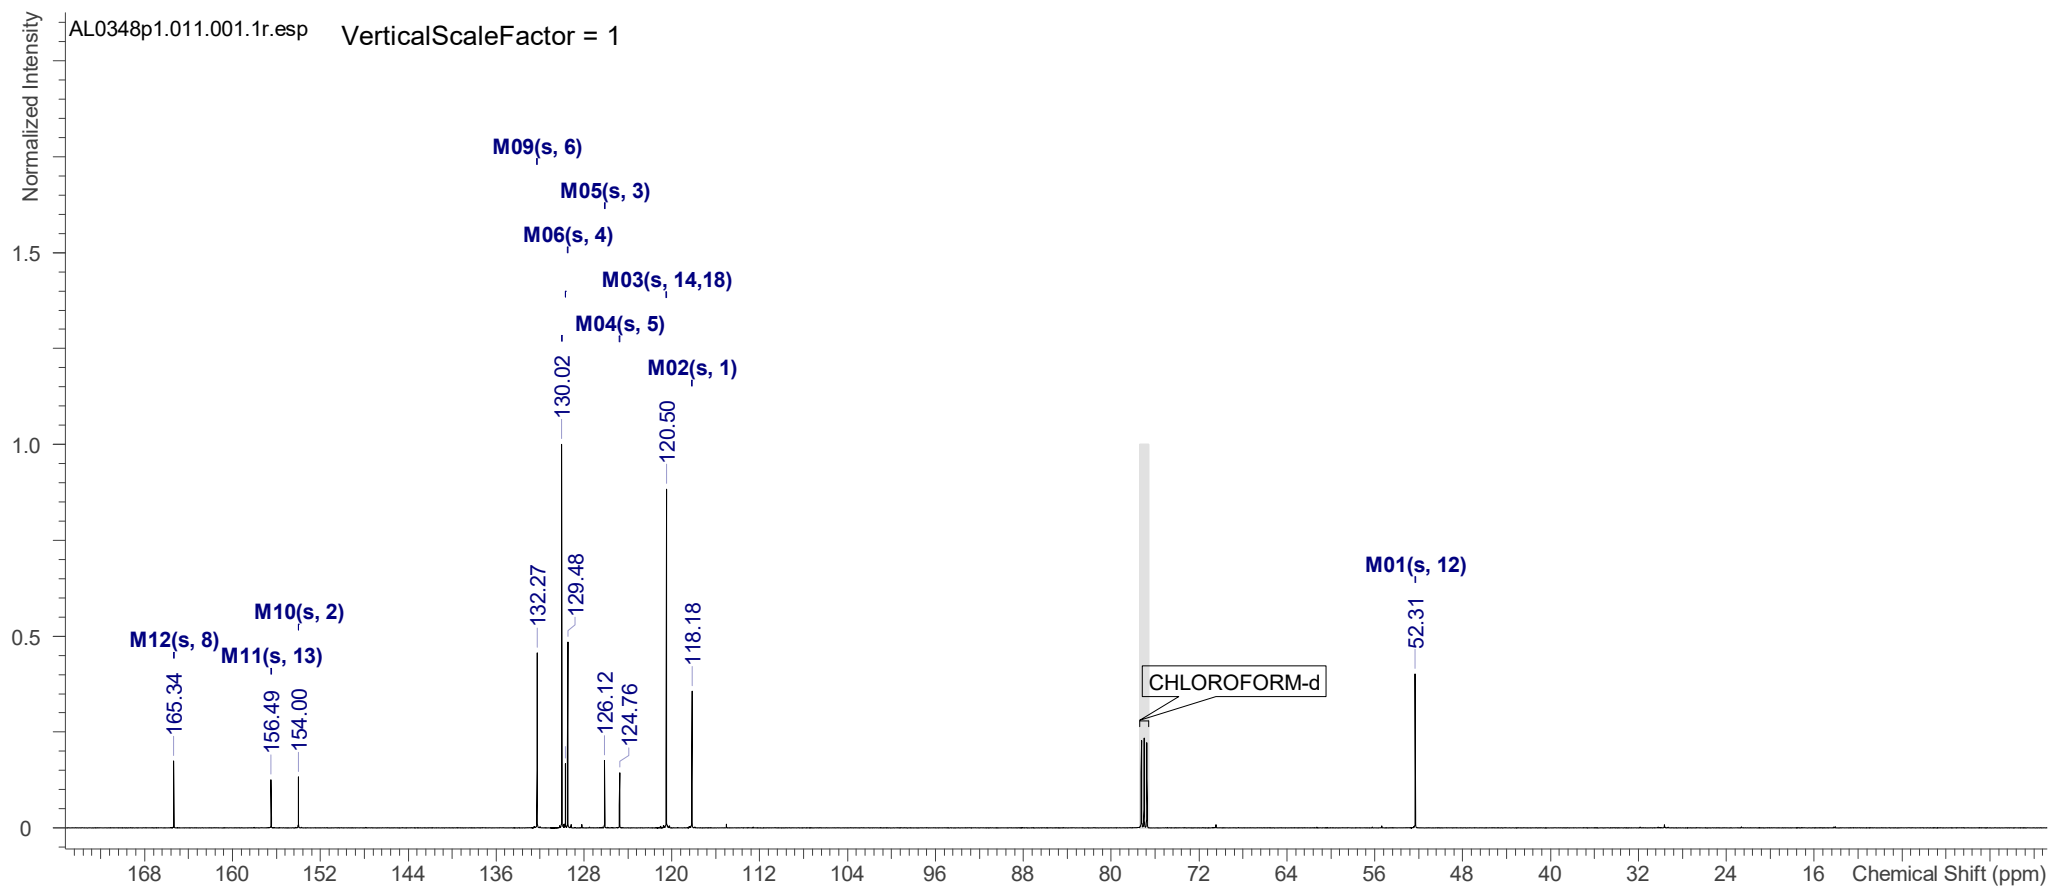

Compound 19

5/17/2022 8:22:02 AM

Multiplets Integrals Sum 7.28 Number of Nuclei 7 H's / 8 H's (spectrum / structure)

<sup>1</sup>H NMR (500 MHz, METHANOL-d<sub>4</sub>, ppm) δ= 8.12 (1 H, d, J = 1.98 Hz), 7.92 (1 H, dd, J = 8.54, 1.98 Hz), 7.43 – 7.38 (2 H, m), 7.05 – 6.98 (3 H, m);

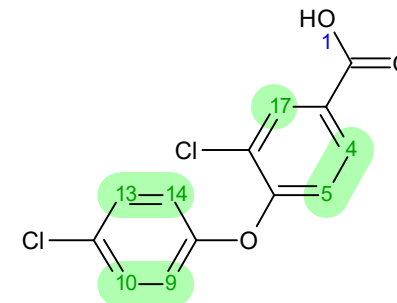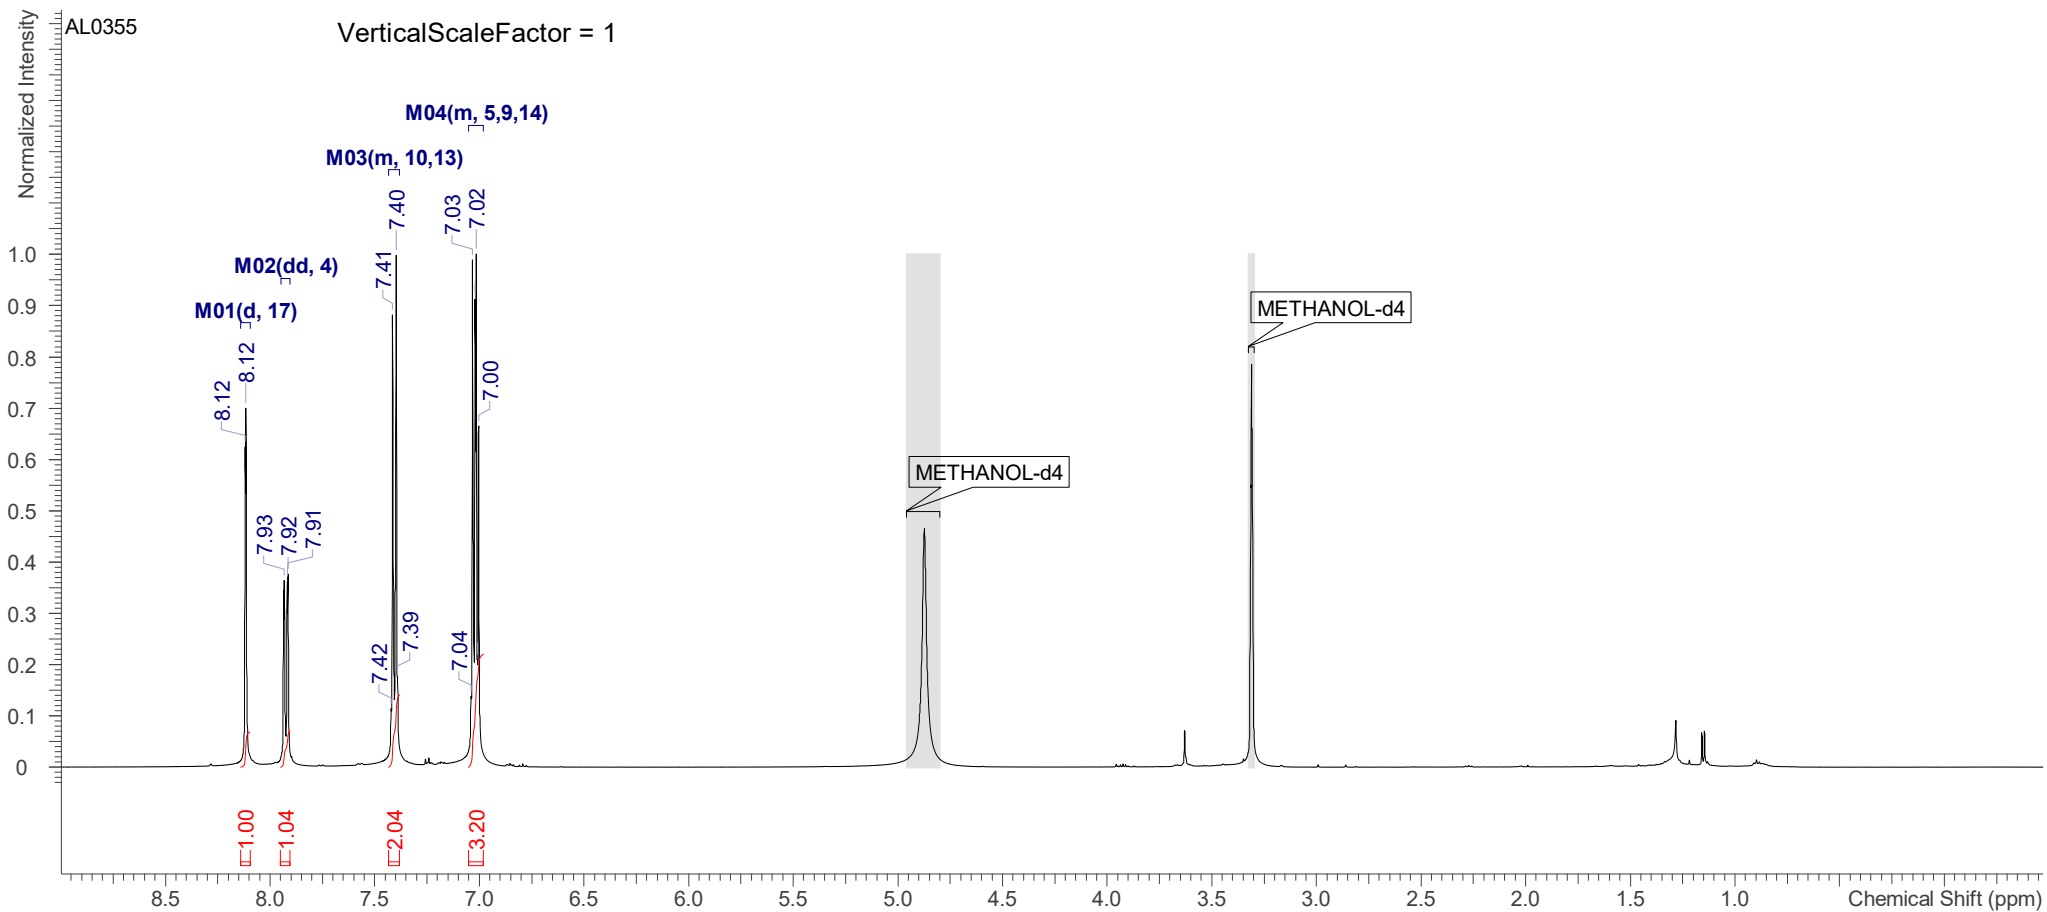

AL0355

Compound 19

5/17/2022 8:22:08 AM

|                         |                                        |                                      |
|-------------------------|----------------------------------------|--------------------------------------|
| <b>Number of Nuclei</b> | 13 C's / 13 C's (spectrum / structure) | <b>Multiplets Integrals Sum</b> 0.00 |
|-------------------------|----------------------------------------|--------------------------------------|

<sup>13</sup>C NMR (126 MHz, METHANOL-d<sub>4</sub>, ppm) δ= 168.0 (1 C, s), 157.8 (1 C, s), 156.1 (1 C, s), 133.5 (1 C, s), 131.4 (2 C, s), 131.3 (1 C, s), 130.8 (1 C, s), 128.8 (1 C, s), 126.2 (1 C, s), 121.6 (2 C, s), 120.9 (1 C, s)

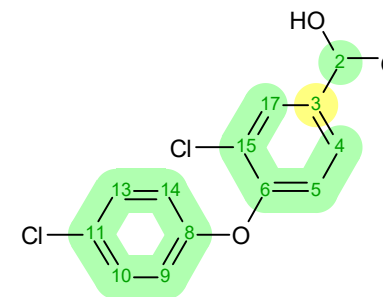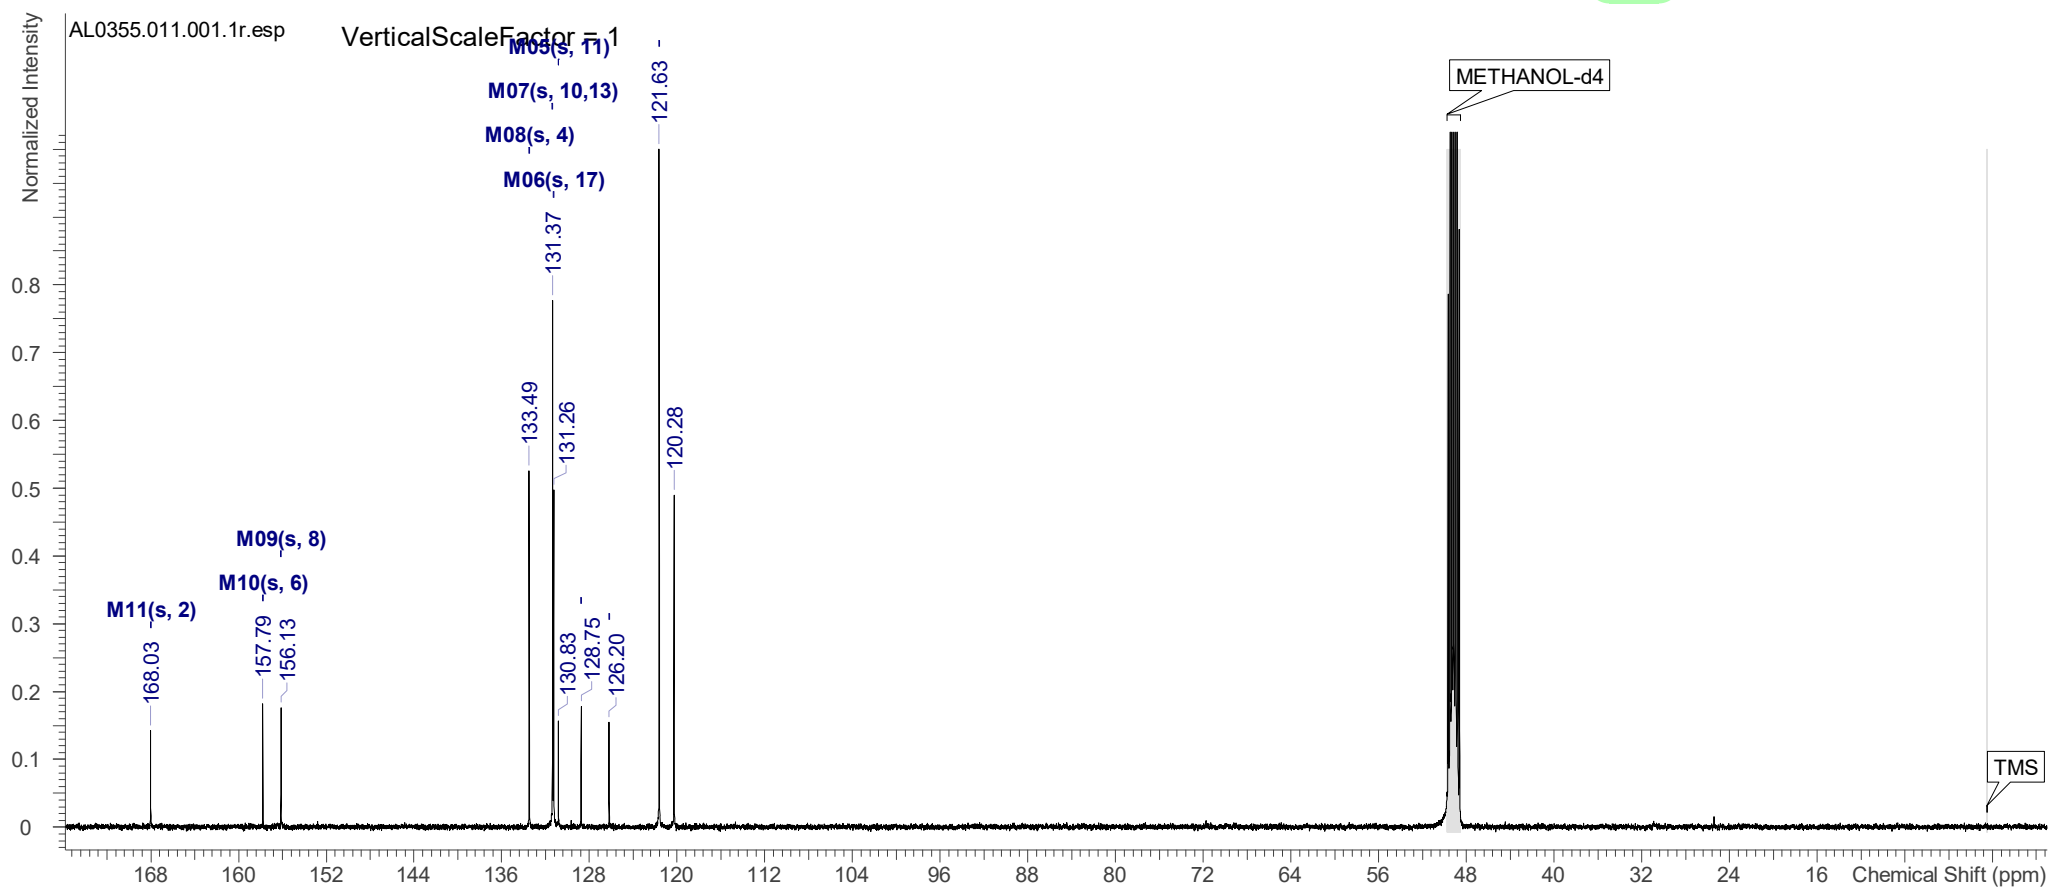

Compound 20

6/2/2022 8:40:47 AM

|                  |                                        |                          |       |
|------------------|----------------------------------------|--------------------------|-------|
| Number of Nuclei | 28 H's / 28 H's (spectrum / structure) | Multiplets Integrals Sum | 28.89 |
|------------------|----------------------------------------|--------------------------|-------|

<sup>1</sup>H NMR (500 MHz, CHLOROFORM-d, ppm) δ= 7.89 (1 H, d, J = 1.98 Hz), 7.63 (1 H, dd, J = 8.54, 2.14 Hz), 7.33 (2 H, d, J = 7.72 Hz), 6.96 – 6.92 (3 H, m), 6.34 (1 H, br t, J = 5.87 Hz), 4.16 – 4.09 (2 H, m), 3.35 (2 H, m), 2.73 – 2.65 (2 H, m), 1.85 – 1.76 (1 H, m), 1.73 (2 H, m), 1.45 (9 H, s), 1.24 – 1.13 (2 H, m);

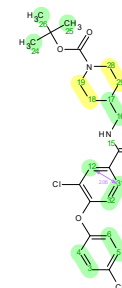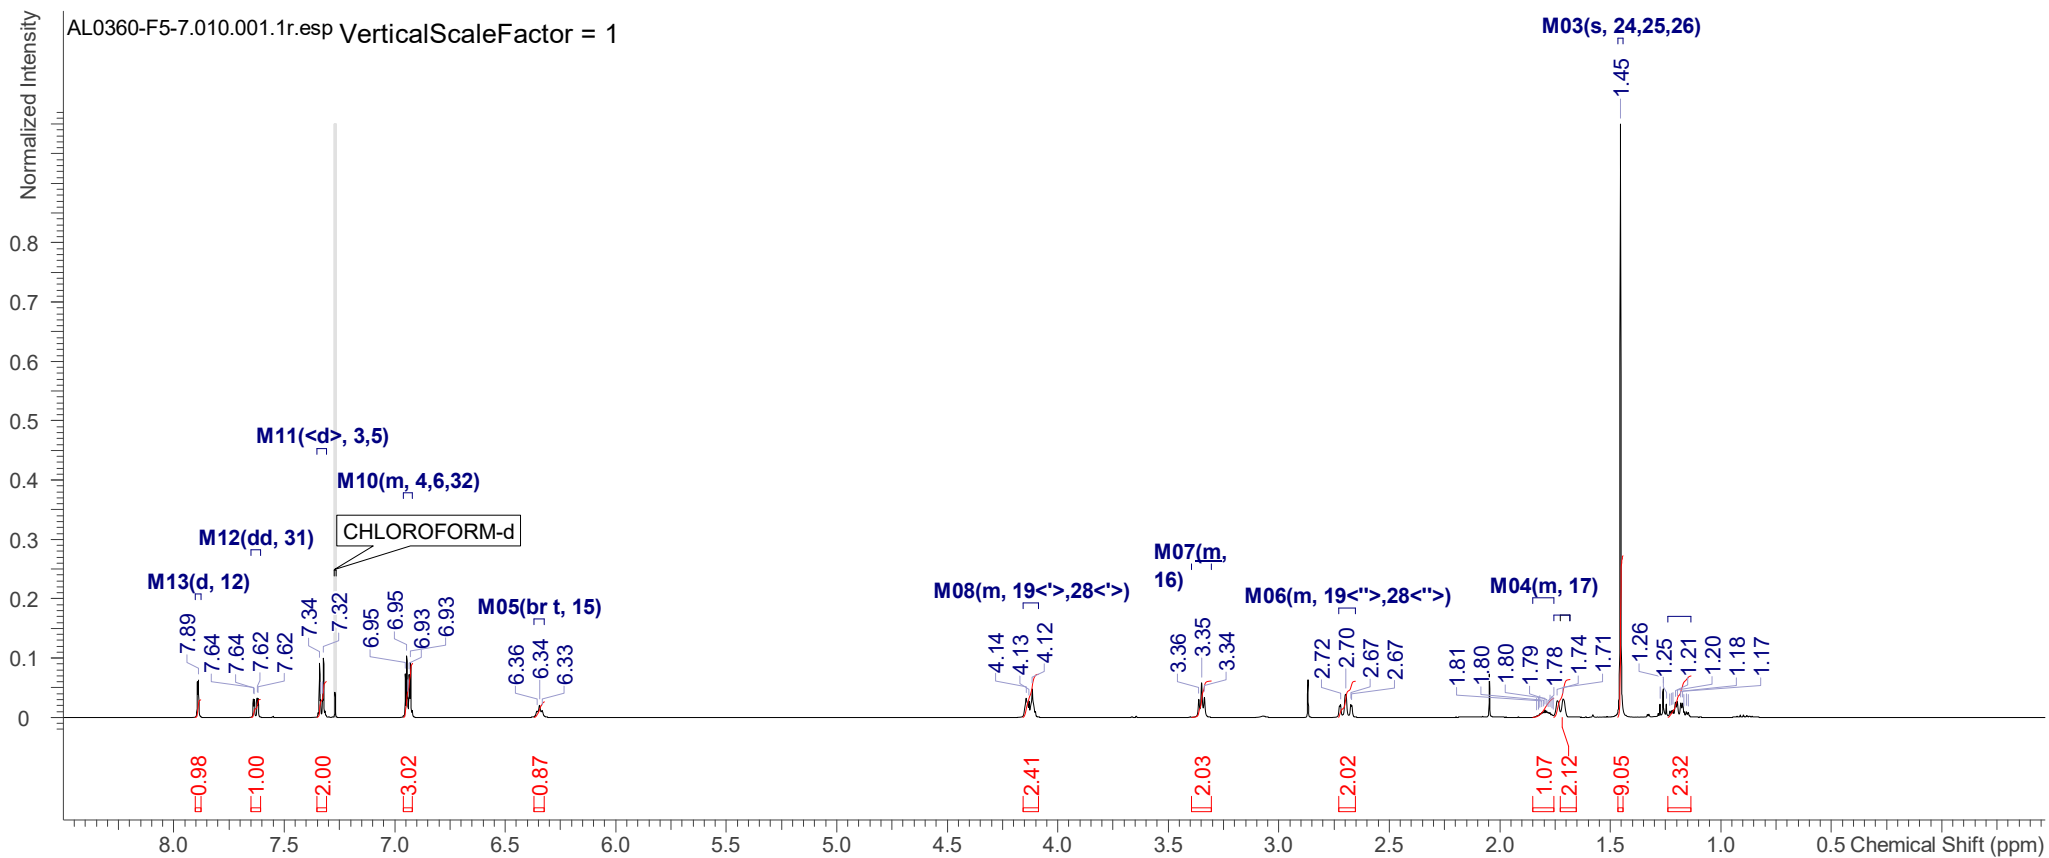

Compound 20

6/2/2022 8:40:53 AM

|                         |                                        |                                      |
|-------------------------|----------------------------------------|--------------------------------------|
| <b>Number of Nuclei</b> | 24 C's / 24 C's (spectrum / structure) | <b>Multiplets Integrals Sum</b> 0.00 |
|-------------------------|----------------------------------------|--------------------------------------|

<sup>13</sup>C NMR (126 MHz, CHLOROFORM-d, ppm) δ= 165.7 (1 C, s), 155.1 (1 C, s), 154.8 (1 C, s), 154.5 (1 C, s), 130.9 (1 C, s), 130.0 (2 C, s), 129.7 (1 C, s), 129.4 (1 C, s), 126.8 (1 C, s), 125.5 (1 C, s), 120.0 (2 C, s), 119.3 (1 C, s), 79.5 (1 C, s), 45.5 (2 C, s), 43.5 (1 C, s), 36.4 (1 C, s), 29.8 (2 C, s), 28.4 (3 C, s)

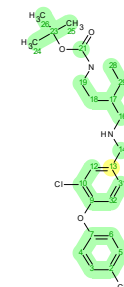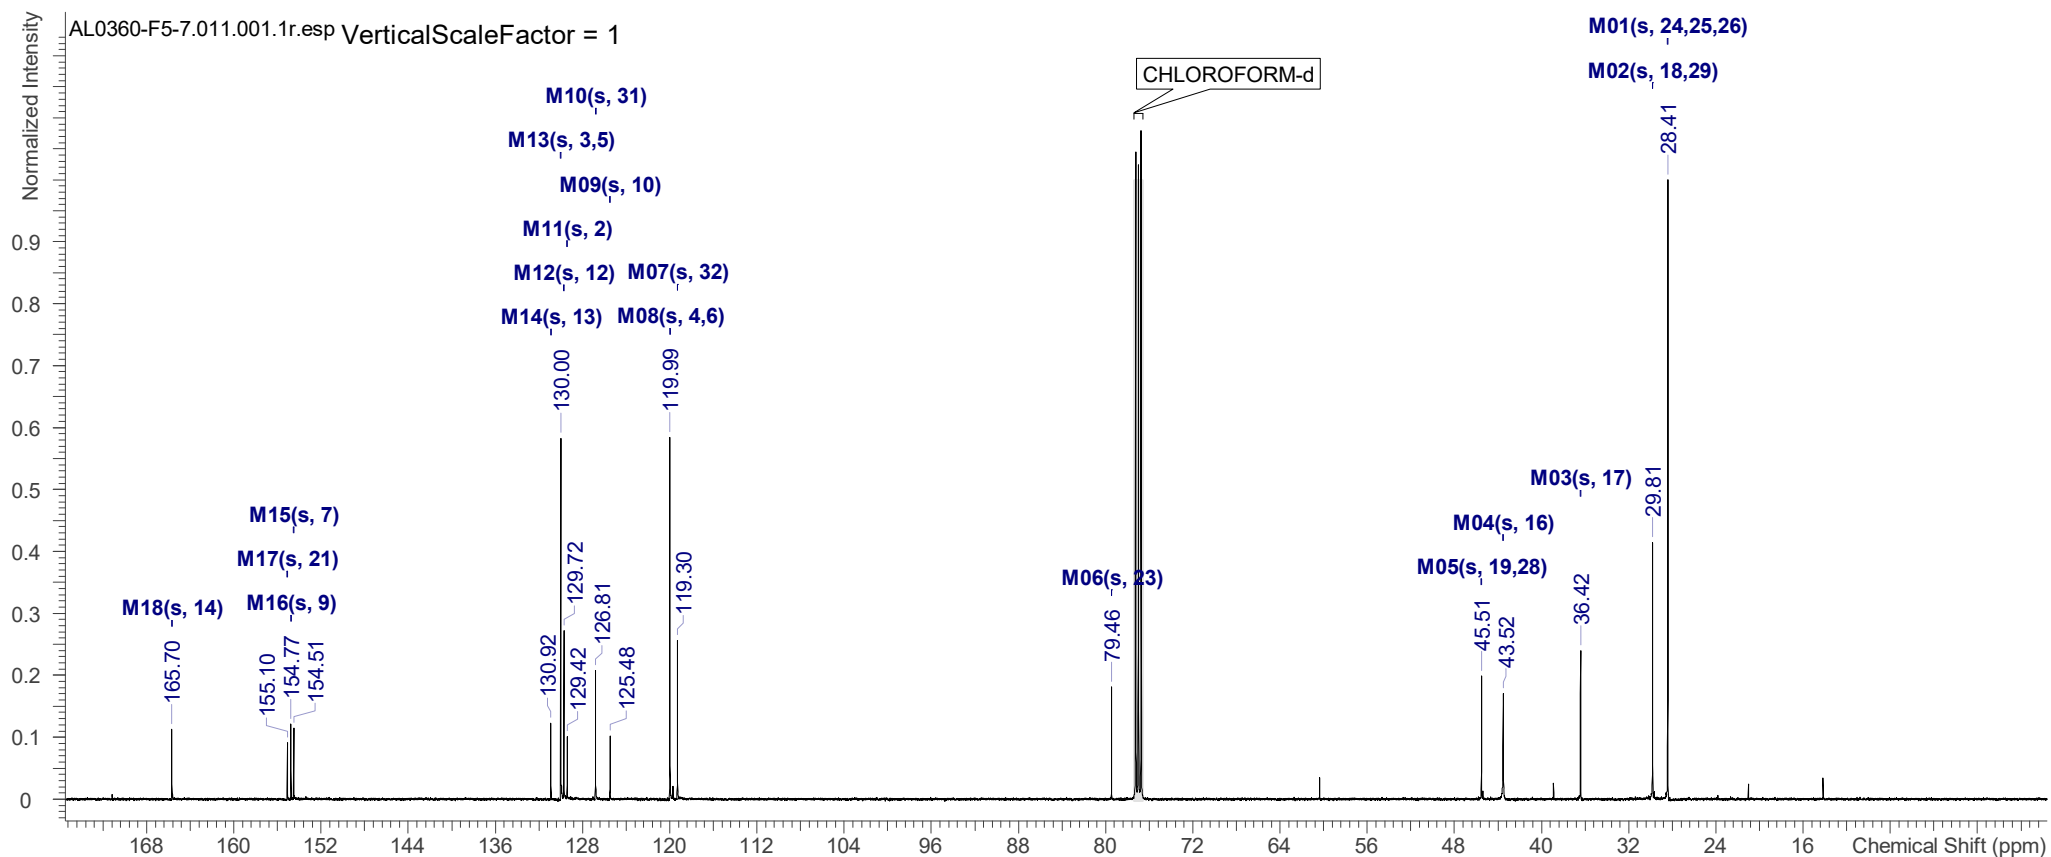

Compound 21

7/21/2022 5:43:44 PM

|                         |                                        |                                 |       |
|-------------------------|----------------------------------------|---------------------------------|-------|
| <b>Number of Nuclei</b> | 18 H's / 20 H's (spectrum / structure) | <b>Multiplets Integrals Sum</b> | 18.19 |
|-------------------------|----------------------------------------|---------------------------------|-------|

<sup>1</sup>H NMR (500 MHz, METHANOL-d<sub>4</sub>, ppm) δ= 8.00 (1 H, d, J = 2.14 Hz), 7.76 (1 H, dd, J = 8.54, 2.14 Hz), 7.42 – 7.36 (2 H, m), 7.04 (1 H, d, J = 8.54 Hz), 7.01 – 6.98 (2 H, m), 3.30 – 3.23 (2 H, m), 3.10 (2 H, m), 2.62 (2 H, m), 1.84 – 1.72 (3 H, m), 1.29 – 1.20 (2 H, m);

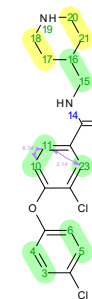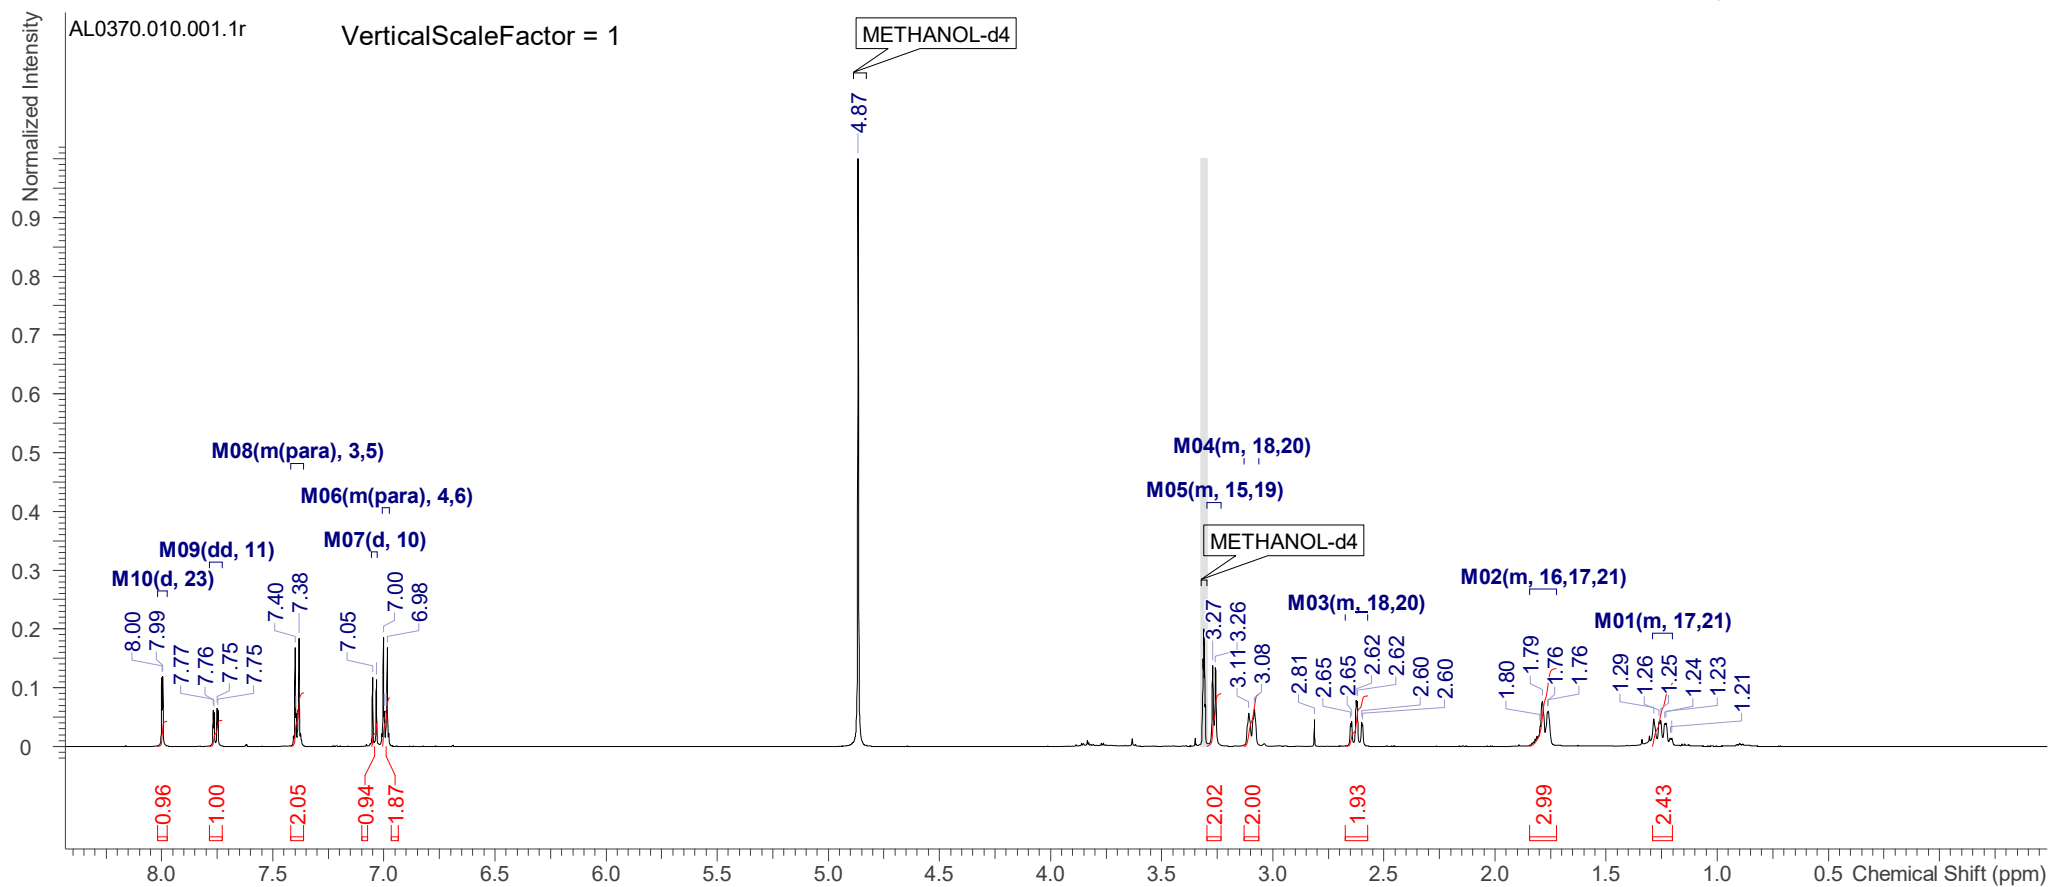

Compound 21

7/21/2022 5:43:48 PM

|                         |                                        |                                      |
|-------------------------|----------------------------------------|--------------------------------------|
| <b>Number of Nuclei</b> | 19 C's / 19 C's (spectrum / structure) | <b>Multiplets Integrals Sum</b> 0.00 |
|-------------------------|----------------------------------------|--------------------------------------|

<sup>13</sup>C NMR (126 MHz, METHANOL-d<sub>4</sub>, ppm) δ= 168.3 (1 C, s), 156.4 (1 C, s), 156.4 (1 C, s), 132.6 (1 C, s), 131.3 (1 C, s), 131.3 (2 C, s), 130.5 (1 C, s), 128.8 (1 C, s), 126.6 (1 C, s), 121.2 (2 C, s), 120.9 (1 C, s), 46.9 (1 C, s), 46.6 (2 C, s), 37.5 (1 C, s), 31.2 (2 C, s).

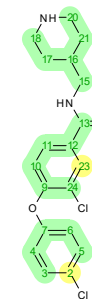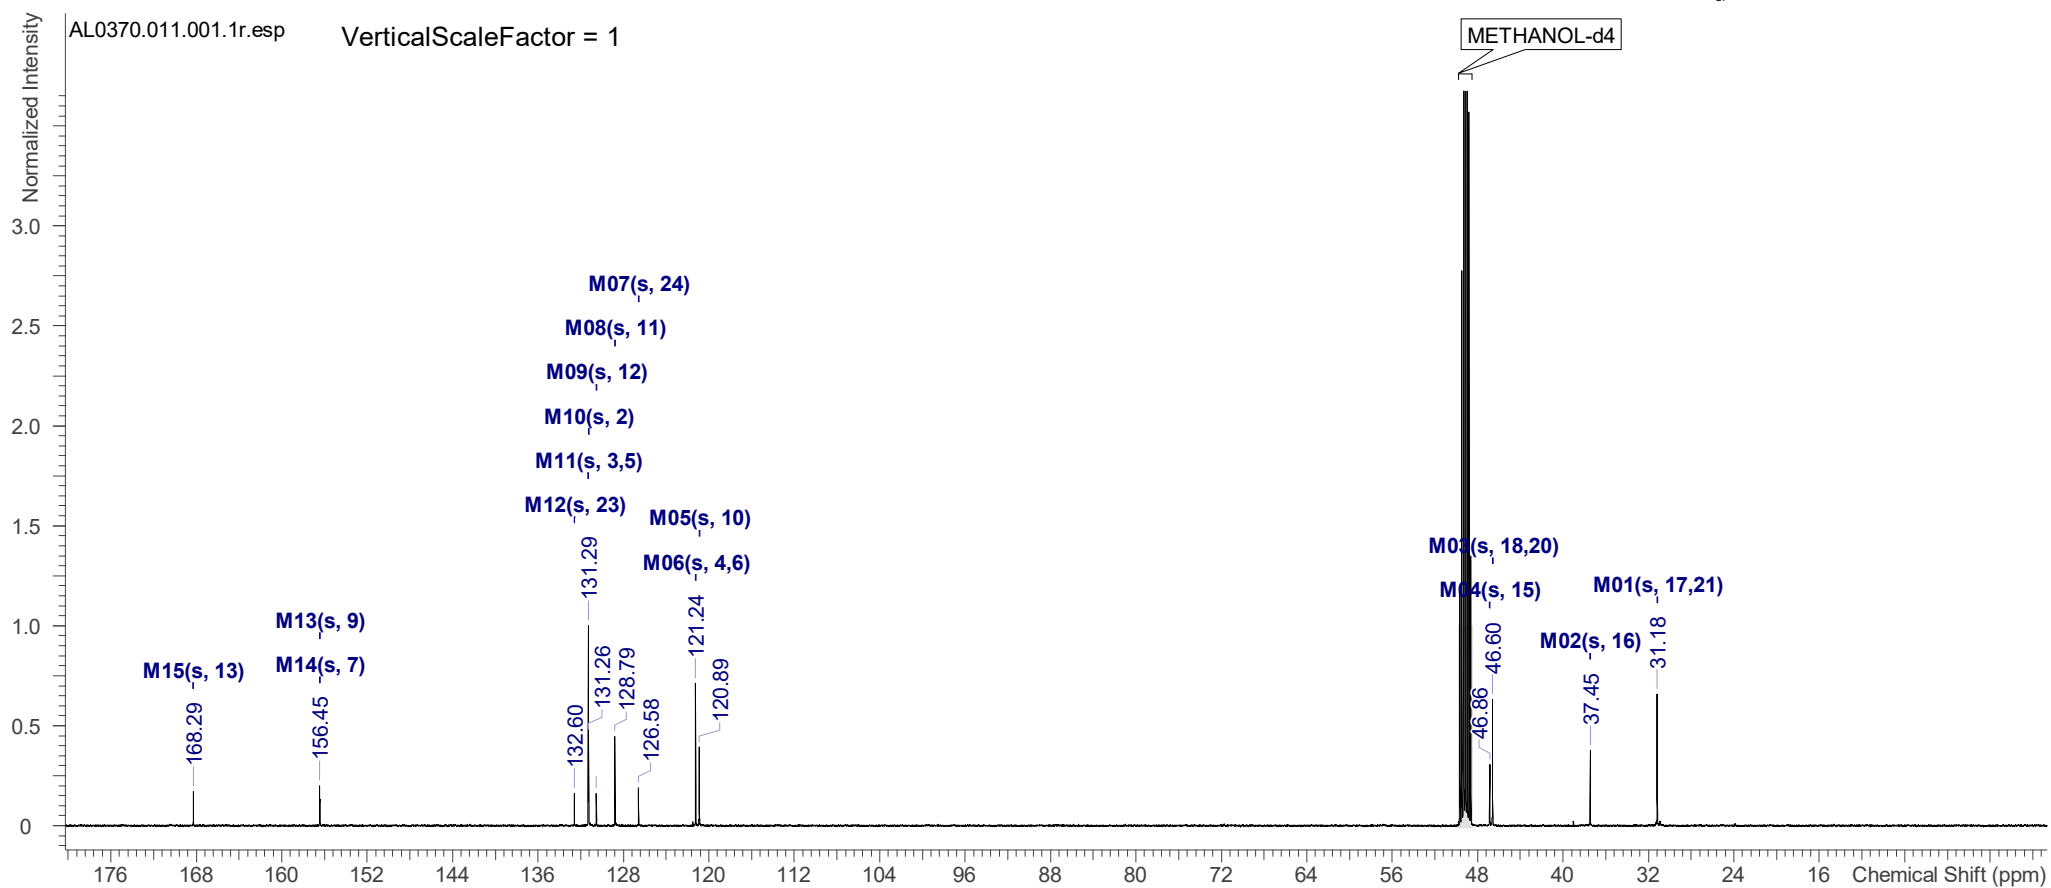

Supplement: Supplementary file 1 [file 0e91fd77191059f48681018b.pdf]
