# Supplementary material for: X-ray Co-crystal Structure of a Novel Pseudomonas aeruginosa DXPS Inhibitor Reveals an Unusual Allosteric Binding Pocket
Source: Research Square preprint supplement (doi:10.21203/rs.3.rs-8434964/v1), 2026-04-10
Supplement: Supplementary file 2 [file 476551da546933374d6c59e9.docx]

**X-ray Co-crystal Structure of a Novel *Pseudomonas aeruginosa* DXPS Inhibitor Reveals an Unusual Allosteric Binding Pocket**

Antoine M. L. Lacour[a], Rawia Hamid[a], Noah D. Smith[b], Lydia J. Kramer[b], Jörg Haupenthal[c, d], Prateek Raj[e], Sidra Eisa[a], Dirk W. Heinz[e], Mostafa M. Hamed[c,d], Eleonora Diamanti[c], Caren L. Freel Meyers[b], Anna K. H. Hirsch*[a, d]

**Abstract:** The enzyme 1-deoxy-D-xylulose 5-phosphate synthase (DXPS) catalyzes the first and rate-limiting step of the methylerythritol 4-phosphate (MEP) pathway, representing a promising target for novel anti-infective agents. Given its essential role in the survival of Gram-negative pathogenic bacteria and its absence in humans, drug-discovery efforts to advance our understanding of this enzyme are urgently needed. Here, we unraveled a novel druggable allosteric pocket in DXPS, unexpectedly revealed through co-crystallization of tool compound **14** with *Pseudomonas aeruginosa* DXPS. This inhibitor, identified via virtual screening and subsequent synthetic optimization, binds within an allosteric site distinct from the active site, engaging the protein through halogen bonding interactions. Compound **14** exhibits comparable IC₅₀ values against both *P. aeruginosa* and *Klebsiella pneumoniae* DXPS, highlighting its potential as a broad-spectrum DXPS inhibitor. This first co-crystal structure of a non-substrate analog inhibitor with a pathogenic DXPS establishes **14** as a valuable tool compound and provides a novel structural template for future antibiotic development.

Contents

[Contents 1](#_Toc217392722)

[Structure-based virtual screening 3](#_Toc217392723)

[Receptor-structure preparation 3](#_Toc217392724)

[Molecular docking 3](#_Toc217392725)

[Data processing and compound selection 3](#_Toc217392726)

[Experimental Procedures 3](#_Toc217392727)

[General information 3](#_Toc217392728)

[Chemicals 4](#_Toc217392729)

[General synthetic methods 4](#_Toc217392730)

[General method A: phenol substitution 4](#_Toc217392731)

[General method B: nitro group reduction (Fe) 4](#_Toc217392732)

[General method C1: peptide coupling 4](#_Toc217392733)

[General method C2: peptide coupling via mixed anhydride 4](#_Toc217392734)

[General method D1: Boc deprotection (TFA) 4](#_Toc217392735)

[General method D2: Boc deprotection (HCl) 4](#_Toc217392736)

[Synthesis and analytical details of compounds 4a–21 5](#_Toc217392737)

[Protein expression and purification 21](#_Toc217392738)

[WT and Δ*ec*DXPS expression and purification 21](#_Toc217392739)

[Inhibition assays 21](#_Toc217392740)

[Inhibition of Δ*kp* and Δ*pa*DXPS by DXPS-IspC coupled assay 21](#_Toc217392741)

[Determining kinetic parameters for *Δec*DXPS and *K*i against WT and *Δec*DXPS by DXPS-IspC coupled assay 21](#_Toc217392742)

[DXPS HPLC-MS/MS assay to determine inhibitory potency 23](#_Toc217392743)

[Crystallography 24](#_Toc217392744)

[Binding Pocket Conservation Analysis 25](#_Toc217392745)

[References 27](#_Toc217392746)

[Author Contributions 28](#_Toc217392747)

Structure-based virtual screening

Receptor-structure preparation

Protein structures were obtained from the RCSB Protein Data Bank (PDB) database1 and downloaded in .pdb format. These files were imported into MOE (Molecular Operating Environment)2 and prepared using the QuickPrep module using the default settings. The prepared files were then imported into SeeSAR (version 10.3),3 and the binding site was initially defined using the ThDP molecule present in the crystal structure. Residues belonging to the substrate channel were then added manually.

Molecular docking

The compound library (3932 compounds from our in-house collection) were imported into the SeeSAR project and docked against the prepared binding site using the default settings (10 poses per compound).

Data processing and compound selection

The docked poses were scored using SeeSAR’s HYDE scoring function and their torsional, inter-clash and intra-clash properties were calculated using the SeeSAR user interface. Poses that showed high torsional strain or important clashes were filtered out from the dataset. Only the pose with the best HYDE score was kept for further processing.

The filtered poses were then rescored using the RFScoreVS4 scoring function. The executable was obtained from the corresponding GitHub repository (https://github.com/oddt/rfscorevs_binary). Since RFScoreVS outputs the score in pIC50 format, the HYDE score was also converted to this format for ease of processing. We then calculated the average score of the two scoring functions and proceeded to compound selection.

The rescored compound library was imported into Stardrop,5 and their chemical space mapped using the ‘Visual Clustering’ method. These coordinates were then exported into KNIME6 and clustered using the k-means algorithm to obtain 14 clusters. We then selected the top compounds from each cluster, also considering the binding affinity scores from SeeSAR and RFScoreVS, chemical intuition and manual inspection of predicted binding modes. This led to the selection of 266 compounds, 140 of which were available in sufficient amounts for biological evaluation. The compounds were initially screened at 120 µM in a DXPS-IspC coupled assay on three homologs of DXPS (*dr*DXPS, Δ*pa*DXPS and Δ*kp*DXPS, unfortunately Δ*mt*DXPS was not available at the time) (see DXPS-IspC coupled assay section below for details).

Experimental Procedures

General information

Reactions were monitored either by thin-layer chromatography or by a liquid chromatography-mass spectrometry (LC-MS) system equipped with a Dionex UltiMate 3000 pump, autosampler, column compartment, detector, and ESI quadrupole MS (MSQ Plus or ISQ EC) from Thermo Fisher Scientific, Dreieich, Germany.

Column chromatography was performed using the automated flash chromatography system CombiFlash®Rf (Teledyne Isco) equipped with RediSepRf silica columns.

Preparative RP-HPLC was performed either using an UltiMate 3000 Semi-Preparative System (Thermo Fisher Scientific) equipped with nucleodur®C18 Gravity (250 mm × 16 mm, 5 μm) column or using a Pure C-850 Flash/Prep (Buchi) equipped with Nucleodur C18 HTec (250 mm x 40 mm, particle size 5 µm). The solvents used for the chromatography were water (0.1% formic acid) and MeCN (0.1% formic acid).

Low-resolution mass spectrometry and purity control of final compounds was carried out using an Ultimate 3000-MSQ LCMS system (Thermo Fisher Scientific) consisting of a pump, an autosampler, MWD detector and an ESI quadrupole mass spectrometer.

High-resolution mass (HRMS) of final products was determined by LCMS/MS using a Thermo Scientific Q Exactive Focus Orbitrap LC-MS/MS system.

1H and 13C NMR spectra were recorded as indicated on a Bruker Avance Neo 500 MHz (1H, 500 MHz; 13C, 126 MHz) with a Prodigy cryoprobe system. Chemical shifts were recorded as δ values in ppm units and referenced against the residual solvent peak (DMSO-*d*6, δ= 2.50, 39.52, CD3OD: δ= 3.27, 47.6, CDCl3: δ= 7.26, 77.16, CD3CN: δ= 1.94, 118.26). Splitting patterns describe apparent multiplicities and are designated as s (singlet), br s (broad singlet), d (doublet), dd (doublet of doublet), t (triplet), q (quartet), m (multiplet). Coupling constants (J) are given in Hertz (Hz).

Chemicals

Unless indicated otherwise, reagents and substrates were purchased from commercial sources and used as received. Solvents not required to be dry were purchased as technical-grade and used as received.

All final compounds were fully characterized by 1H, 13C-NMR (19F-NMR where applicable) and HRMS techniques. All final compounds have a purity > 95% according to LC-MS.

General synthetic methods

General method A: phenol substitution

The nitrophenyl fluoride (1 eq.), the appropriately substituted phenol (1.1 eq.) and cesium carbonate (2 eq.) were dissolved in acetonitrile (10 mL/g of nitrophenyl fluoride). The reaction mixture was heated to 60 °C and stirred overnight. Upon completion, 10 mol/LNaOH was added to the reaction, and the resulting solution was extracted with ethyl acetate (3 x). The combined organic layers were washed with water, followed by saturated aqueous NaCl solution, dried over magnesium sulfate, filtered and concentrated by rotary evaporation. Unless indicated otherwise, the resulting nitrophenylether was used as is without further purification.

General method B: nitro group reduction (Fe)

The nitrophenylether (1 eq.) was dissolved in EtOH (140 eq.) and ammonium chloride solution (166 mM, 0.5 eq.). Iron powder (5 eq.) was added, and the resulting suspension refluxed at 80 °C for 3 hours. Upon completion, the iron was removed using a magnet, and the filtrate was concentrated by rotary evaporation. The resulting residue was dissolved in ethyl acetate and washed sequentially with 2 mol/L NaOH (2 x) and saturated aqueous NaCl solution. The combined organic layers were dried over magnesium sulfate, filtered and concentrated by rotary evaporation. The crude product was purified by flash column chromatography (0–100% ethyl acetate in cyclohexane) to yield the pure product.

General method C1: peptide coupling

The amino phenoxyether (1 eq.), carboxylic acid (1.1 eq.), potassium carbonate (3 eq.) and HATU (1.1 eq.) were dissolved in acetonitrile (80 mL/g of starting material) and stirred at room temperature overnight. Upon completion, water was added to the reaction, and the resulting solution was extracted with ethyl acetate (3 x). The combined organic layers were washed once with saturated aqueous NaCl solution , dried over magnesium sulfate, filtered and concentrated by rotary evaporation. The crude product was purified by flash column chromatography (0–100% ethyl acetate in cyclohexane or 0–10% MeOH in DCM) to yield the pure product.

General method C2: peptide coupling via mixed anhydride

The carboxylic acid (1.1 eq.) and *N*-methyl morpholine (1.1 eq.) were dissolved in DCM at 0 °C. Isopropyl chloroformate (1.1 eq.) was added dropwise to the solution, and the resulting reaction mixture stirred at room temperature for 1 hour. The amino phenoxyether (1 eq.) was then added as a solution in DCM, and the resulting reaction mixture stirred at room temperature for 4 hours. Upon completion, the reaction mixture was evaporated to dryness, re-dissolved in 4 mol/L HCl in dioxane and stirred at room temperature overnight. The reaction mixture was concentrated by rotary evaporation, and the crude product was purified by prep-HPLC, and the obtained fractions dried by freeze-drying.

General method D1: Boc deprotection (TFA)

The carboxamide (1 eq.) was dissolved in DCM. TFA (3 eq.) was added, and the resulting mixture stirred at room temperature overnight. Upon completion, the reaction mixture was concentrated by rotary evaporation. If required, the crude product was purified by prep-HPLC and the obtained fractions dried by freeze-drying.

General method D2: Boc deprotection (HCl)

The carboxamide (1 eq.) was dissolved in 4 mol/L HCl in dioxane, and the resulting mixture stirred at room temperature overnight. Upon completion, the reaction mixture was concentrated by rotary evaporation. If required, the crude product was purified by prep-HPLC, and the obtained fractions dried by freeze-drying.

Synthesis and analytical details of compounds 4a–21

**2-Chloro-1-(4-chlorophenoxy)-4-nitrobenzene (4a)**

Prepared using general method A, starting from 1,2-dichloro-4-nitrobenzene (5.00 g, 26.04 mmol). Desired product was obtained as a dark yellow oil in 92.3% yield (6.83 g, 24.06 mmol).

1H NMR (500 MHz, CHLOROFORM-*d*, ppm) δ= 8.31 (1 H, d, J = 2.75 Hz), 8.00 (1 H, dd, J = 9.08, 2.67 Hz), 7.36 – 7.31 (2 H, m), 6.99 – 6.94 (2 H, m), 6.83 (1 H, d, J = 9.16 Hz); 13C NMR (126 MHz, CHLOROFORM-*d*, ppm) δ= 158.5 (1 C, s), 153.2 (1 C, s), 143.0 (1 C, s), 130.9 (1 C, s), 130.5 (2 C, s), 126.7 (1 C, s), 125.0 (1 C, s), 123.7 (1 C, s), 121.3 (2 C, s), 117.1 (1 C, s)

**2-Chloro-4-nitro-1-phenoxybenzene (4b)**

Prepared using general method A, starting from 2-chloro-1-fluoro-4-nitrobenzene (500 mg, 2.85 mmol). Desired product was obtained as a light-yellow oil in 84.4% yield (600 mg, 2.40 mmol).

1H NMR (500 MHz, CHLOROFORM-*d*, ppm) δ= 8.39 (1 H, d, J = 2.59 Hz), 8.06 (1 H, dd, J = 9.08, 2.67 Hz), 7.49 – 7.43 (2 H, m), 7.29 (1 H, t, J = 7.40 Hz), 7.10 (2 H, dd, J = 8.54, 0.76 Hz), 6.88 (1 H, d, J = 9.00 Hz); 13C NMR (126 MHz, CHLOROFORM-*d*, ppm) δ= 159.1 (1 C, s), 154.5 (1 C, s), 142.6 (1 C, s), 130.4 (2 C, s), 126.5 (1 C, s), 125.7 (1 C, s), 124.7 (1 C, s), 123.6 (1 C, s), 120.2 (1 C, s), 116.7 (2 C, s)

**1-Nitro-4-phenoxybenzene (4c)**

Prepared using general method A, starting from 1-fluoro-4-nitrobenzene (1.00 g, 7.09 mmol). Desired product was obtained as a light-yellow oil in 85.2% yield (1.30 g, 6.04 mmol).

1H NMR (500 MHz, CHLOROFORM-*d*, ppm) δ= 8.24 – 8.19 (2 H, m), 7.48 – 7.42 (2 H, m), 7.29 – 7.25 (1 H, m), 7.10 (2 H, d, J = 7.78 Hz), 7.05 – 7.00 (2 H, m); 13C NMR (126 MHz, CHLOROFORM-*d*, ppm) δ= 163.4 (1 C, s), 154.7 (1 C, s), 142.6 (1 C, s), 130.3 (2 C, s), 125.9 (2 C, s), 125.4 (1 C, s), 120.5 (2 C, s), 117.1 (2 C, s)

**2-(4-Chlorophenoxy)-5-nitrobenzonitrile (4d)**

Prepared using general method A, starting from 2-fluoro-5-nitrobenzonitrile (500 mg, 3.01 mmol). Desired product was obtained as a yellow oil in 50.4% yield (417 mg, 1.52 mmol).

1H NMR (500 MHz, CHLOROFORM-*d*, ppm) δ= 8.59 (1 H, d, J = 2.59 Hz), 8.34 (1 H, dd, J = 9.31, 2.75 Hz), 7.50 – 7.46 (2 H, m), 7.14 – 7.10 (2 H, m), 6.91 (1 H, d, J = 9.31 Hz); 13C NMR (126 MHz, CHLOROFORM-*d*, ppm) δ= 164.0 (1 C, s), 151.8 (1 C, s), 142.2 (1 C, s), 132.3 (1 C, s), 130.8 (2 C, s), 130.0 (1 C, s), 129.7 (1 C, s), 122.2 (2 C, s), 115.5 (1 C, s), 113.7 (1 C, s), 103.9 (1 C, s)

**2-(4-Cyanophenoxy)-5-nitrobenzonitrile (4e)**

Prepared using general method A, starting from 2-fluoro-5-nitrobenzonitrile (500 mg, 3.01 mmol). Desired product was obtained as a yellow oil in 67.8% yield (541 mg, 2.04 mmol).

1H NMR (500 MHz, CHLOROFORM-*d*, ppm) δ= 8.63 (1 H, d, J = 2.59 Hz), 8.41 (1 H, dd, J = 9.16, 2.75 Hz), 7.85 – 7.79 (2 H, m), 7.29 – 7.26 (2 H, m), 7.03 (1 H, d, J = 9.31 Hz); 13C NMR (126 MHz, CHLOROFORM-*d*, ppm) δ= 162.4 (1 C, s), 157.0 (1 C, s), 143.1 (1 C, s), 134.9 (2 C, s), 130.1 (1 C, s), 129.8 (1 C, s), 121.0 (2 C, s), 117.6 (1 C, s), 117.1 (1 C, s), 113.3 (1 C, s), 110.4 (1 C, s), 105.1 (1 C, s)

**2-Fluoro-1-(4-fluorophenoxy)-4-nitrobenzene (4f)**

Prepared using general method A, starting from 1,2-difluoro-4-nitrobenzene (200 mg, 1.26 mmol). Desired product was obtained as a light-yellow oil in 95.0% yield (300 mg, 1.19 mmol).

1H NMR (500 MHz, ACETONITRILE-*d*3, ppm) δ= 8.15 (1 H, dd, J = 10.76, 2.67 Hz), 8.00 (1 H, dt, J = 9.12, 1.70 Hz), 7.24 – 7.15 (4 H, m), 7.02 (1 H, t, J = 8.70 Hz); 13C NMR (126 MHz, ACETONITRILE-*d*3, ppm) δ= 114.1 (1 C, d, J = 22.98 Hz), 118.0 (2 C, d, J = 23.90 Hz), 119.2 (1 C, s), 122.0 (1 C, d, J = 3.68 Hz), 122.6 (2 C, d, J = 9.19 Hz), 143.9 (1 C, br d, J = 8.27 Hz), 151.8 (1 C, d, J = 2.76 Hz), 153.0 (1 C, d, J = 250.02 Hz), 152.3 (1 C, d, J = 10.11 Hz), 161.0 (1 C, d, J = 241.75 Hz); 19F NMR (470 MHz, ACETONITRILE-*d*3, ppm) δ= -131.1 (1 F, br d, J = 8.67 Hz), -119.0 (1 F, s)

**1-(4-Chlorophenoxy)-2-fluoro-4-nitrobenzene (4g)**

Prepared using general method A, starting from 1,2-difluoro-4-nitrobenzene (200 mg, 1.26 mmol). Desired product was obtained as a light-yellow oil in 88.3% yield (297 mg, 1.11 mmol).

1H NMR (500 MHz, ACETONITRILE-*d*3, ppm) δ= 8.15 (1 H, dd, J = 10.68, 2.75 Hz), 8.02 (1 H, dt, J = 9.04, 1.81 Hz), 7.49 – 7.43 (2 H, m), 7.16 – 7.12 (2 H, m), 7.10 (1 H, t, J = 8.70 Hz); 13C NMR (126 MHz, ACETONITRILE-*d*3, ppm) δ= 114.2 (1 C, d, J = 23.90 Hz), 120.1 (1 C, s), 122.1 (1 C, br s), 122.1 (2 C, s), 131.0 (1 C, s), 131.4 (2 C, s), 144.4 (1 C, s), 151.5 (1 C, d, J = 11.95 Hz), 153.3 (1 C, d, J = 250.94 Hz), 154.9 (1 C, s); 19F NMR (470 MHz, ACETONITRILE-*d*3, ppm) δ= -130.4 (1 F, br d, J = 8.68 Hz)

**2-Chloro-1-(4-fluorophenoxy)-4-nitrobenzene (4h)**

Prepared using general method A, starting from 2-chloro-1-fluoro-4-nitrobenzene (200 mg, 1.14 mmol). Desired product was obtained as a light brown oil in 98.1% yield (299 mg, 1.12 mmol).

1H NMR (500 MHz, ACETONITRILE-*d*3, ppm) δ= 8.39 (1 H, d, J = 2.59 Hz), 8.07 (1 H, dd, J = 9.16, 2.59 Hz), 7.25 – 7.14 (4 H, m), 6.92 (1 H, d, J = 9.16 Hz); 13C NMR (126 MHz, ACETONITRILE-*d*3, ppm) δ= 118.1 (2 C, d, J = 23.90 Hz), 118.3 – 118.4 (1 C, m), 123.1 (2 C, d, J = 8.27 Hz), 124.9 (1 C, s), 125.2 (1 C, s), 127.3 (1 C, s), 144.0 (1 C, s), 151.6 (1 C, d, J = 2.76 Hz), 161.1 (1 C, d, J = 256.46 Hz), 160.2 (1 C, s); 19F NMR (470 MHz, ACETONITRILE-*d*3, ppm) δ= -119.7 – -117.40 ­ (1 F, m)

**1-(4-Bromophenoxy)-2-chloro-4-nitrobenzene (4i)**

Prepared using general method A, starting from 2-chloro-1-fluoro-4-nitrobenzene (200 mg, 1.14 mmol). Desired product was obtained as a dark yellow oil in 94.3% yield (353 mg, 1.07 mmol).

1H NMR (500 MHz, ACETONITRILE-*d*3, ppm) δ= 8.40 (1 H, dd, J = 5.87, 2.36 Hz), 8.10 (1 H, ddd, J = 8.89, 6.29, 2.52 Hz), 7.67 – 7.58 (2 H, m), 7.12 – 6.98 (3 H, m); 13C NMR (126 MHz, ACETONITRILE-*d*3, ppm) δ= 118.8 (1 C, br s), 119.1 (1 C, s), 122.9 (2 C, s), 125.2 (1 C, s), 125.6 (1 C, s), 127.4 (1 C, s), 134.5 (2 C, s), 144.5 (1 C, s), 155.2 (1 C, s), 159.2 (1 C, d, J = 1.84 Hz)

**2-Chloro-1-(4-iodophenoxy)-4-nitrobenzene (4j)**

Prepared using general method A, starting from 2-chloro-1-fluoro-4-nitrobenzene (200 mg, 1.14 mmol). Desired product was obtained as a dark-yellow oil in 93.0% yield (398 mg, 1.06 mmol).

1H NMR (500 MHz, ACETONITRILE-*d*3, ppm) δ= 8.40 (1 H, d, J = 2.75 Hz), 8.10 (1 H, dd, J = 9.00, 2.75 Hz), 7.83 – 7.76 (2 H, m), 7.03 (1 H, d, J = 9.16 Hz), 6.95 – 6.90 (2 H, m); 13C NMR (126 MHz, ACETONITRILE-*d*3, ppm) δ= 159.1 (1 C, s), 156.0 (1 C, s), 144.5 (1 C, s), 140.5 (2 C, s), 127.4 (1 C, s), 125.7 (1 C, s), 125.2 (1 C, s), 123.1 (2 C, s), 119.3 (1 C, s), 89.5 (1 C, s)

**3-Chloro-4-(4-chlorophenoxy)aniline (5a)**

Prepared from **4a** using general method B. Desired product was obtained as a clear oil that crystalized upon standing in 88.4% yield (5.40 g, 21.25 mmol).

1H NMR (500 MHz, CHLOROFORM-*d*, ppm) δ= 7.26 – 7.22 (2 H, m), 6.90 (1 H, d, J = 8.54 Hz), 6.84 – 6.80 (2 H, m), 6.78 (1 H, d, J = 2.75 Hz), 6.57 (1 H, dd, J = 8.54, 2.75 Hz), 3.69 (2 H, br s); 13C NMR (126 MHz, CHLOROFORM-*d*, ppm) δ= 157.0 (1 C, s), 144.3 (1 C, s), 143.0 (1 C, s), 129.4 (2 C, s), 127.3 (1 C, s), 127.0 (1 C, s), 123.4 (1 C, s), 117.3 (2 C, s), 116.5 (1 C, s), 114.6 (1 C, s)

**3-Chloro-4-phenoxyaniline (5b)**

Prepared from **4b** using general method B. Desired product was obtained as a light brown oil that crystalized upon standing in 61.6% yield (325 mg, 1.48 mmol).

1H NMR (500 MHz, CHLOROFORM-*d*, ppm) δ= 7.26 – 7.22 (2 H, m), 6.90 (1 H, d, J = 8.54 Hz), 6.84 – 6.80 (2 H, m), 6.78 (1 H, d, J = 2.75 Hz), 6.57 (1 H, dd, J = 8.54, 2.75 Hz), 3.69 (2 H, br s); 13C NMR (126 MHz, CHLOROFORM-*d*, ppm) δ= 157.0 (1 C, s), 144.3 (1 C, s), 143.0 (1 C, s), 129.4 (2 C, s), 127.3 (1 C, s), 127.0 (1 C, s), 123.4 (1 C, s), 117.3 (2 C, s), 116.5 (1 C, s), 114.6 (1 C, s)

**4-Phenoxyaniline (5c)**

Prepared from **4c** using general method B. Desired product was obtained as a clear oil in 35.0% yield (392 mg, 2.12 mmol).

1H NMR (500 MHz, CHLOROFORM-*d*, ppm) δ= 7.33 – 7.27 (2 H, m), 7.02 (1 H, t, J = 7.32 Hz), 6.96 – 6.92 (2 H, m), 6.91 – 6.86 (2 H, m), 6.71 – 6.66 (2 H, m), 3.59 (2 H, br s); 13C NMR (126 MHz, CHLOROFORM-*d*, ppm) δ= 158.9 (1 C, s), 148.6 (1 C, s), 142.7 (1 C, s), 129.0 (2 C, s), 122.0 (1 C, s), 121.1 (2 C, s), 117.2 (2 C, s), 116.2 (2 C, s)

**5-Amino-2-(4-chlorophenoxy)benzonitrile (5d)**

Prepared from **4d** using general method B. Desired product was obtained as a light-yellow oil that crystalized upon standing in 89.1% yield (342 mg, 1.40 mmol).

1H NMR (500 MHz, CHLOROFORM-*d*, ppm) δ= 7.31 – 7.28 (2 H, m), 6.94 – 6.90 (3 H, m), 6.85 – 6.83 (2 H, m), 3.79 (2 H, br s); 13C NMR (126 MHz, CHLOROFORM-*d*, ppm) δ= 155.8 (1 C, s), 150.3 (1 C, s), 143.0 (1 C, s), 129.8 (2 C, s), 128.6 (1 C, s), 120.9 (1 C, s), 120.9 (1 C, s), 119.2 (2 C, s), 118.4 (1 C, s), 115.8 (1 C, s), 105.7 (1 C, s)

**5-Amino-2-(4-cyanophenoxy)benzonitrile (5e)**

Prepared from **4e** using general method B. Desired product was obtained as a light-yellow oil that crystalized upon standing in 59.6% yield (286 mg, 1.22 mmol).

1H NMR (500 MHz, CHLOROFORM-*d*, ppm) δ= 7.65 – 7.60 (2 H, m), 7.02 – 6.99 (2 H, m), 6.97 – 6.94 (2 H, m), 6.92 – 6.89 (1 H, m), 3.90 (2 H, br s); 13C NMR (126 MHz, CHLOROFORM-*d*, ppm) δ= 161.2 (1 C, s), 147.8 (1 C, s), 144.2 (1 C, s), 134.3 (2 C, s), 122.6 (1 C, s), 120.8 (1 C, s), 118.6 (1 C, s), 118.4 (1 C, s), 117.3 (2 C, s), 115.2 (1 C, s), 106.9 (1 C, s), 106.5 (1 C, s)

**3-fluoro-4-(4-fluorophenoxy)aniline (5f)**

Prepared from **4f** using general method B. Desired product was obtained as a clear oil that crystalized upon standing in 83.7% yield (221 mg, 0.99 mmol).

1H NMR (500 MHz, METHANOL-*d*4, ppm) δ= 7.35 – 7.30 (1 H, m), 7.18 (2 H, dd, J = 4.43, 1.83 Hz), 7.16 – 7.10 (2 H, m), 7.07 – 7.01 (2 H, m); 13C NMR (126 MHz, METHANOL-*d*4, ppm) δ= 113.7 (1 C, br d, J = 22.06 Hz), 117.7 (2 C, br d, J = 23.90 Hz), 120.9 (2 C, d, J = 8.27 Hz), 120.9 (1 C, br s), 123.1 (1 C, s), 128.5 – 128.7 (1 C, m), 146.4 (1 C, br d, J = 11.03 Hz), 154.0 (1 C, s), 155.3 (1 C, br d, J = 250.94 Hz), 160.8 (1 C, br d, J = 240.83 Hz); 19F NMR (470 MHz, METHANOL-*d*4, ppm) δ= -129.8 – -129.3 (1 F, m), -121.5 – -121.1 (1 F, m)

**4-(4-Chlorophenoxy)-3-fluoroaniline (5g)**

Prepared from **4g** using general method B. Desired product was obtained as a light-brown oil in 88.7% yield (234 mg, 0.98 mmol).

1H NMR (500 MHz, METHANOL-*d*4, ppm) δ= 7.40 – 7.35 (3 H, m), 7.29 – 7.22 (2 H, m), 7.02 – 6.98 (2 H, m); 13C NMR (126 MHz, METHANOL-*d*4, ppm) δ= 114.1 (1 C, d, J = 22.06 Hz), 120.4 (2 C, s), 121.3 (1 C, d, J = 3.68 Hz), 124.0 (1 C, d, J = 1.84 Hz), 128.6 (1 C, d, J = 8.27 Hz), 130.4 (1 C, s), 131.2 (2 C, s), 145.8 (1 C, d, J = 11.95 Hz), 155.5 (1 C, d, J = 251.86 Hz), 157.0 (1 C, s); 19F NMR (470 MHz, METHANOL-*d*4, ppm) δ= -128.5 (1 F, br dd, J = 10.41, 6.93 Hz)

**3-Chloro-4-(4-fluorophenoxy)aniline (5h)**

Prepared from **4h** using general method B. Desired product was obtained as a light-yellow oil that crystalized upon standing in 73.4% yield (195 mg, 0.82 mmol).

1H NMR (500 MHz, METHANOL-*d*4, ppm) δ= 7.58 (1 H, d, J = 2.59 Hz), 7.32 (1 H, dd, J = 8.77, 2.67 Hz), 7.19 – 7.13 (2 H, m), 7.08 (1 H, d, J = 8.85 Hz), 7.06 – 7.00 (2 H, m); 13C NMR (126 MHz, METHANOL-*d*4, ppm) δ= 117.9 (2 C, d, J = 23.90 Hz), 121.6 (1 C, s), 121.7 (2 C, d, J = 1.84 Hz), 124.5 (1 C, s), 126.9 (1 C, s), 127.4 (1 C, s), 127.9 (1 C, s), 153.5 (1 C, s), 155.3 (1 C, s), 161.0 (1 C, d, J = 241.75 Hz); 19F NMR (470 MHz, METHANOL-*d*4, ppm) δ= -120.8 – -120.7 (1 F, m)

**4-(4-Bromophenoxy)-3-chloroaniline (5i)**

Prepared from **4i** using general method B. Desired product was obtained as a brown oil that crystalized upon standing in 96.9% yield (311 mg, 1.04 mmol).

1H NMR (500 MHz, METHANOL-*d*4, ppm) δ= 7.56 – 7.50 (3 H, m), 7.29 (1 H, dd, J = 8.77, 2.67 Hz), 7.16 (1 H, d, J = 8.70 Hz), 6.93 – 6.88 (2 H, m); 13C NMR (126 MHz, METHANOL-*d*4, ppm) δ= 157.3 (1 C, s), 155.8 (1 C, s), 153.3 (1 C, s), 134.3 (2 C, s), 128.2 (1 C, s), 126.2 (1 C, s), 123.9 (1 C, s), 123.1 (1 C, s), 121.1 (2 C, s), 117.6 (1 C, s)

**2-Chloro-1-(4-iodophenoxy)aniline (5j)**

Prepared from **4j** using general method B. Desired product was obtained as a light-brown oil that crystalized upon standing in 88.2% yield (323 mg, 0.93 mmol).

1H NMR (500 MHz, METHANOL-*d*4, ppm) δ= 7.70 (2 H, d, J = 8.85 Hz), 7.51 (1 H, d, J = 2.59 Hz), 7.28 (1 H, dd, J = 8.77, 2.52 Hz), 7.16 (1 H, d, J = 8.70 Hz), 6.81 – 6.75 (2 H, m); 13C NMR (126 MHz, METHANOL-*d*4, ppm) δ= 158.2 (1 C, s), 156.1 (1 C, s), 153.0 (1 C, s), 140.4 (2 C, s), 128.2 (1 C, s), 126.0 (1 C, s), 123.7 (1 C, s), 123.3 (1 C, s), 121.3 (2 C, s), 87.7 (1 C, s)

***tert*-Butyl 4-((3-chloro-4-(4-chlorophenoxy)phenyl)carbamoyl)piperidine-1-carboxylate (6a)**

Prepared from **5a** using general method C1. Desired product was obtained as a cream-colored solid in 51.3% yield (94 mg, 0.20 mmol).

1H NMR (500 MHz, CHLOROFORM-*d*, ppm) δ= 7.79 (1 H, d, J = 2.44 Hz), 7.70 (1 H, s), 7.41 (1 H, dd, J = 8.85, 2.44 Hz), 7.30 – 7.27 (2 H, m), 6.99 (1 H, d, J = 8.85 Hz), 6.87 (2 H, d, J = 8.20 Hz), 4.21 (2 H, m), 2.81 (2 H, br s), 2.44 (1 H, s), 1.91 (2 H, m), 1.77 (2 H, m), 1.50 (9 H, s); 13C NMR (126 MHz, CHLOROFORM-*d*, ppm) δ= 172.9 (1 C, s), 155.9 (1 C, s), 154.7 (1 C, s), 148.0 (1 C, s), 135.0 (1 C, s), 129.7 (2 C, s), 128.0 (1 C, s), 126.5 (1 C, s), 122.3 (1 C, s), 121.7 (1 C, s), 119.6 (1 C, s), 118.4 (2 C, s), 79.9 (1 C, s), 44.1 (2 C, s), 43.1 (1 C, s), 28.5 (2 C, s), 28.4 (3 C, s)

***tert*-Butyl 4-((3-chloro-4-(4-chlorophenoxy)phenyl)carbamoyl)piperidine-1-carboxylate (6b)**

Prepared from **5b** using general method C1. Desired product was obtained as a gray solid in 56.1% yield (55 mg, 0.127 mmol).

1H NMR (500 MHz, CHLOROFORM-*d*, ppm) δ= 7.76 (1 H, d, J = 2.44 Hz), 7.51 (1 H, s), 7.38 – 7.29 (3 H, m), 7.09 (1 H, t, J = 7.40 Hz), 6.97 (1 H, d, J = 8.85 Hz), 6.92 (2 H, d, J = 7.93 Hz), 4.19 (2 H, m), 2.79 (2 H, m), 2.40 (1 H, m), 1.95 – 1.87 (2 H, m), 1.81 – 1.70 (2 H, m), 1.48 (9 H, s); 13C NMR (126 MHz, CHLOROFORM-*d*, ppm) δ= 172.72 (1 C, s), 157.19 (1 C, s), 154.68 (1 C, s), 148.58 (1 C, s), 134.48 (1 C, s), 129.72 (2 C, s), 126.36 (1 C, s), 123.13 (1 C, s), 122.25 (1 C, s), 121.45 (1 C, s), 119.56 (1 C, s), 117.36 (2 C, s), 79.84 (1 C, s), 44.15 (2 C, s), 43.11 (1 C, br s), 28.53 (2 C, s), 28.41 (3 C, s)

***tert*-Butyl 4-((3-cyano-4-(4-cyanophenoxy)phenyl)carbamoyl)piperidine-1-carboxylate (6c)**

Prepared from **5e** using general method C1. Desired product was obtained as a light yellow solid in 33.7% yield (32 mg, 0.07 mmol).

1H NMR (500 MHz, CHLOROFORM-*d*, ppm) δ= 7.98 (1 H, d, J = 2.59 Hz), 7.92 (1 H, s), 7.83 (1 H, dd, J = 9.08, 2.67 Hz), 7.69 – 7.64 (2 H, m), 7.08 – 7.06 (2 H, m), 7.04 (1 H, d, J = 9.00 Hz), 4.19 (2 H, m), 2.81 (2 H, m), 2.45 (1 H, m), 1.95 – 1.86 (2 H, m), 1.75 (2 H, m), 1.47 (9 H, s); 13C NMR (126 MHz, CHLOROFORM-*d*, ppm) δ= 173.1 (1 C, s), 158.0 (1 C, s), 154.7 (1 C, s), 152.6 (1 C, s), 135.4 (1 C, s), 134.4 (2 C, s), 126.1 (1 C, s), 124.7 (1 C, s), 120.8 (1 C, s), 118.4 (2 C, s), 118.3 (1 C, s), 114.8 (1 C, s), 107.5 (1 C, s), 106.0 (1 C, s), 80.0 (1 C, s), 44.1 (2 C, s), 43.1 (1 C, br s), 28.4 (3 C, s), 28.4 – 28.4 (2 C, m)

***tert*-Butyl 4-((3-fluoro-4-(4-fluorophenoxy)phenyl)carbamoyl)piperidine-1-carboxylate (6d)**

Prepared from **5f** using general method C1. Desired product was obtained as a white solid in 43.0% yield (42 mg, 0.097 mmol).

1H NMR (500 MHz, CHLOROFORM-*d*, ppm) δ= 7.63 (1 H, br dd, J = 12.13, 4.04 Hz), 7.48 (1 H, br d, J = 3.81 Hz), 7.17 – 7.10 (1 H, m), 7.04 – 6.90 (5 H, m), 4.21 (2 H, br s), 2.80 (2 H, br s), 2.45 – 2.37 (1 H, m), 1.91 – 1.75 (4 H, m), 1.48 (9 H, s); 13C NMR (126 MHz, CHLOROFORM-*d*, ppm) δ= 28.4 (3 C, s), 28.5 (2 C, s), 43.1 (2 C, s), 44.2 (1 C, s), 79.8 (1 C, s), 109.5 (1 C, d, J = 22.98 Hz), 115.7 (1 C, d, J = 3.68 Hz), 116.2 (2 C, d, J = 23.90 Hz), 118.3 (2 C, d, J = 8.27 Hz), 121.8 (1 C, s), 134.7 (1 C, d, J = 10.11 Hz), 140.1 (1 C, d, J = 11.03 Hz), 153.9 (1 C, d, J = 249.10 Hz), 153.4 (1 C, d, J = 1.84 Hz), 154.7 (1 C, s), 158.5 (1 C, d, J = 240.83 Hz), 172.7 (1 C, s); 19F NMR (470 MHz, CHLOROFORM-*d*, ppm) δ= -128.3 (1 F, br d, J = 12.14 Hz), -120.7 (1 F, br s)

***tert*-Butyl 4-((4-(4-chlorophenoxy)-3-fluorophenyl)carbamoyl)piperidine-1-carboxylate (6e)**

Prepared from **5g** using general method C1. Desired product was obtained as a gray solid in 39.2% yield (37 mg, 0.082 mmol).

1H NMR (500 MHz, CHLOROFORM-*d*, ppm) δ= 7.64 (1 H, dd, J = 12.21, 2.29 Hz), 7.33 (1 H, s), 7.27 – 7.24 (2 H, m), 7.14 (1 H, br d, J = 8.85 Hz), 7.05 – 7.01 (1 H, m), 6.90 – 6.85 (2 H, m), 4.20 (2 H, m), 2.85 – 2.77 (2 H, m), 2.40 (1 H, m), 1.94 – 1.88 (2 H, m), 1.75 (2 H, m), 1.48 (9 H, s); 13C NMR (126 MHz, CHLOROFORM-*d*, ppm) δ= 28.4 (3 C, s), 28.5 (2 C, s), 43.1 (1 C, s), 44.3 (2 C, s), 79.9 (1 C, s), 109.5 (1 C, d, J = 22.98 Hz), 115.7 (1 C, d, J = 2.76 Hz), 117.9 (2 C, s), 122.4 (1 C, s), 128.0 (1 C, s), 129.6 (2 C, s), 135.1 (1 C, d, J = 10.11 Hz), 139.3 (1 C, d, J = 11.95 Hz), 154.2 (1 C, d, J = 249.10 Hz), 154.7 (1 C, s), 156.3 (1 C, s), 172.6 (1 C, s); 19F NMR (470 MHz, CHLOROFORM-*d*, ppm) δ= -127.6 (1 F, br dd, J = 12.14, 8.67 Hz)

***tert*-Butyl 4-((3-chloro-4-(4-fluorophenoxy)phenyl)carbamoyl)piperidine-1-carboxylate (6f)**

Prepared from **5h** using general method C1. Desired product was obtained as a pale yellow solid in 30.7% yield (29 mg, 0.064 mmol).

1H NMR (500 MHz, CHLOROFORM-*d*, ppm) δ= 7.75 (2 H, br d, J = 2.29 Hz), 7.37 (1 H, dd, J = 8.85, 2.29 Hz), 7.03 – 6.97 (2 H, m), 6.93 – 6.86 (3 H, m), 4.18 (2 H, m), 2.78 (2 H, m), 2.41 (1 H, m), 1.88 (2 H, m), 1.74 (2 H, m), 1.47 (9 H, s); 13C NMR (126 MHz, CHLOROFORM-*d*, ppm) δ= 28.4 (1 C, s), 28.5 (1 C, s), 43.1 (1 C, br s), 44.1 (1 C, s), 79.8 (1 C, s), 116.2 (2 C, d, J = 23.90 Hz), 118.9 (2 C, d, J = 8.27 Hz), 119.6 (1 C, s), 120.8 (1 C, s), 122.3 (1 C, s), 126.0 (1 C, s), 134.6 (1 C, s), 148.8 (1 C, s), 153.0 (1 C, d, J = 2.76 Hz), 154.7 (1 C, s), 158.6 (1 C, d, J = 241.75 Hz), 172.9 (1 C, s); 19F NMR (470 MHz, CHLOROFORM-*d*, ppm) δ= -120.4 – -120.3 (1 F, m)

***tert*-Butyl 4-((4-(4-bromophenoxy)-3-chlorophenyl)carbamoyl)piperidine-1-carboxylate (6g)**

Prepared from **5i** using general method C1. Desired product was obtained as a tan solid in 43.3% yield (37 mg, 0.073 mmol).

1H NMR (500 MHz, CHLOROFORM-*d*, ppm) δ= 7.77 (1 H, d, J = 1.98 Hz), 7.45 (1 H, br s), 7.43 – 7.36 (3 H, m), 6.98 (1 H, d, J = 8.85 Hz), 6.79 (2 H, d, J = 8.85 Hz), 4.20 (2 H, m), 2.80 (2 H, br s), 1.90 (2 H, m), 1.75 (3 H, m), 1.48 (9 H, s); 13C NMR (126 MHz, CHLOROFORM-*d*, ppm) δ= 172.7 (1 C, s), 156.5 (1 C, s), 154.7 (1 C, s), 147.9 (1 C, s), 135.0 (1 C, s), 132.6 (2 C, s), 126.7 (1 C, s), 122.3 (1 C, s), 121.8 (1 C, s), 119.6 (1 C, s), 118.8 (2 C, s), 115.5 (1 C, s), 79.9 (1 C, s), 44.2 (2 C, s), 43.1 (1 C, s), 28.5 (2 C, s), 28.4 (3 C, s)

***tert*-Butyl 4-((3-chloro-4-(4-iodophenoxy)phenyl)carbamoyl)piperidine-1-carboxylate (6h)**

Prepared from **5j** using general method C1. Desired product was obtained as a light brown solid in 48.4% yield (39 mg, 0.070 mmol).

1H NMR (500 MHz, CHLOROFORM-*d*, ppm) δ= 7.77 (1 H, d, J = 2.29 Hz), 7.62 – 7.57 (2 H, m), 7.40 – 7.35 (2 H, m), 6.99 (1 H, d, J = 8.85 Hz), 6.70 – 6.66 (2 H, m), 4.20 (2 H, m), 2.80 (2 H, m), 2.40 (1 H, m), 1.90 (2 H, m), 1.75 (2 H, m), 1.48 (9 H, s); 13C NMR (126 MHz, CHLOROFORM-*d*, ppm) δ= 172.7 (1 C, s), 157.4 (1 C, s), 154.7 (1 C, s), 147.8 (1 C, s), 138.6 (2 C, s), 135.0 (1 C, s), 126.8 (1 C, s), 122.3 (1 C, s), 121.9 (1 C, s), 119.6 (1 C, s), 119.2 (2 C, s), 85.7 (1 C, s), 79.9 (1 C, s), 44.2 (2 C, s), 43.1 (1 C, s), 28.5 (2 C, s), 28.4 (3 C, s)

***N*-(3-Chloro-4-(4-chlorophenoxy)phenyl)piperidine-4-carboxamide formate (1)**

Prepared from **6a** using general method D2. Desired product was obtained as a white solid in 88.1% yield (65 mg, 0.178 mmol).

1H NMR (500 MHz, METHANOL-*d*4, ppm) δ= 8.56 (1 H, s), 7.91 (1 H, d, J = 2.44 Hz), 7.46 (1 H, dd, J = 8.77, 2.52 Hz), 7.34 – 7.27 (2 H, m), 7.06 (1 H, d, J = 8.85 Hz), 6.89 – 6.84 (2 H, m), 3.51 – 3.42 (2 H, m), 3.05 (2 H, m), 2.75 – 2.66 (1 H, m), 2.12 – 2.04 (2 H, m), 2.02 – 1.92 (2 H, m); 13C NMR (126 MHz, METHANOL-*d*4, ppm) δ= 174.6 (1 C, s), 170.7 (1 C, s), 158.1 (1 C, s), 149.2 (1 C, s), 137.8 (1 C, s), 131.1 (2 C, s), 129.2 (1 C, s), 127.8 (1 C, s), 123.6 (1 C, s), 123.5 (1 C, s), 121.3 (1 C, s), 119.6 (2 C, s), 44.6 (2 C, s), 42.1 (1 C, s), 27.1 (2 C, s). HRMS (ESI): calcd for C18H19Cl2N2O2 [*M*+H]+, 365.0818; found,365.0811

***N*-(3-Chloro-4-phenoxyphenyl)piperidine-4-carboxamide (7a)**

Prepared from **6b** using general method D2 and subsequently neutralized. Desired product was obtained as an off-white solid in 87.6% yield (37 mg, 0.112 mmol).

1H NMR (500 MHz, METHANOL-*d*4, ppm) δ= 7.89 (1 H, d, J = 2.44 Hz), 7.43 (1 H, dd, J = 8.77, 2.52 Hz), 7.31 (2 H, t, J = 7.86 Hz), 7.07 (1 H, t, J = 7.32 Hz), 6.99 (1 H, d, J = 8.85 Hz), 6.88 (2 H, d, J = 8.54 Hz), 3.31 – 3.27 (2 H, m), 2.86 (2 H, m), 2.62 (1 H, m), 1.99 – 1.94 (2 H, m), 1.90 – 1.80 (2 H, m); 13C NMR (126 MHz, METHANOL-*d*4, ppm) δ= 175.3 (1 C, s), 159.0 (1 C, s), 149.5 (1 C, s), 137.3 (1 C, s), 131.0 (2 C, s), 127.3 (1 C, s), 124.2 (1 C, s), 123.3 (1 C, s), 122.9 (1 C, s), 121.0 (1 C, s), 118.2 (2 C, s), 45.4 (2 C, s), 43.5 (1 C, s), 28.6 (2 C, s). HRMS (ESI): calcd for C18H20ClN2O2 [*M*+H]+, 331.1207; found,331.1201

***N*-(4-Phenoxyphenyl)piperidine-4-carboxamide formate (7b)**

Prepared from **4c** using general methods C2 and D1 without any intermediary purification, then subsequently neutralized. Desired product was obtained as an off-white solid in 18.4% yield (over two steps) (17 mg, 0.050 mmol).

1H NMR (500 MHz, DMSO-*d*6, ppm) δ= 10.19 (1 H, br s), 8.45 (1 H, br s), 7.63 (2 H, br d, J = 8.54 Hz), 7.35 (2 H, br t, J = 7.63 Hz), 7.08 (1 H, br t, J = 7.17 Hz), 6.96 (4 H, br dd, J = 14.80, 8.39 Hz), 3.24 (2 H, m), 2.80 (2 H, m), 2.61 (1 H, m), 1.95 – 1.72 (4 H, m); 13C NMR (126 MHz, DMSO-*d*6, ppm) δ= 172.3 (1 C, s), 166.2 (1 C, br s), 157.4 (1 C, s), 151.5 (1 C, s), 135.2 (1 C, s), 129.9 (2 C, s), 122.9 (1 C, s), 120.8 (2 C, s), 119.5 (2 C, s), 117.7 (2 C, s), 42.7 (2 C, s), 40.7 (1 C, br s), 25.9 (2 C, s). HRMS (ESI): m/z calcd for C18H21N2O2 [*M*+H]+, 297.1598; found, 297.1596

***N*-(4-(4-Chlorophenoxy)-3-cyanophenyl)piperidine-4-carboxamide (7c)**

Prepared from **5d** using general methods C1 and D2 without any intermediary purification, and subsequently neutralized. Desired product was obtained as a gray solid in 26.1% yield (over two steps) (19 mg, 0.053 mmol).

1H NMR (500 MHz, METHANOL-*d*4, ppm) δ= 8.06 (1 H, d, J = 2.59 Hz), 7.73 (1 H, dd, J = 9.16, 2.59 Hz), 7.43 – 7.39 (2 H, m), 7.08 – 7.04 (2 H, m), 6.99 (1 H, d, J = 9.00 Hz), 3.14 (2 H, m), 2.68 (2 H, m), 2.52 (1 H, m), 1.85 (2 H, m), 1.78 – 1.68 (2 H, m); 13C NMR (126 MHz, METHANOL-*d*4, ppm) δ= 176.5 (1 C, s), 156.6 (1 C, s), 156.1 (1 C, s), 136.8 (1 C, s), 131.6 (2 C, s), 131.1 (1 C, s), 127.8 (1 C, s), 126.0 (1 C, s), 121.8 (2 C, s), 120.6 (1 C, s), 116.6 (1 C, s), 105.8 (1 C, s), 46.4 (2 C, s), 45.0 (1 C, s), 30.1 (2 C, s). HRMS (ESI): m/z calcd for C19H19ClN3O2 [*M*+H]+ 356.116; found, 356.1156

***N*-(3-Cyano-4-(4-cyanophenoxy)phenyl)piperidine-4-carboxamide formate (7d)**

Prepared from **6c** using general method D2. Desired product was obtained as a light-yellow solid in 67.6% yield (19 mg, 0.048 mmol).

1H NMR (500 MHz, METHANOL-*d*4, ppm) δ= 8.53 (1 H, br s), 8.17 (1 H, d, J = 2.59 Hz), 7.82 (1 H, dd, J = 9.00, 2.59 Hz), 7.80 – 7.76 (2 H, m), 7.21 (1 H, d, J = 9.00 Hz), 7.16 (2 H, d, J = 7.86 Hz), 3.53 – 3.46 (2 H, m), 3.08 (2 H, m), 2.74 (1 H, m), 2.15 – 2.07 (2 H, m), 2.06 – 1.93 (2 H, m); 13C NMR (126 MHz, METHANOL-*d*4, ppm) δ= 174.5 (1 C, s), 170.1 (1 C, s), 161.9 (1 C, s), 153.9 (1 C, s), 137.7 (1 C, s), 135.9 (2 C, s), 127.6 (1 C, s), 125.8 (1 C, s), 122.7 (1 C, s), 119.6 (1 C, s), 119.5 (2 C, s), 116.1 (1 C, s), 108.6 (1 C, s), 107.1 (1 C, s), 44.3 (2 C, s), 41.7 (1 C, s), 26.7 (2 C, s). HRMS (ESI): calcd for C20H19N4O2 [*M*+H]+ , 347.1502 found,347.1501

***N*-(3-Fluoro-4-(4-fluorophenoxy)phenyl)piperidine-4-carboxamide hydrochloride (7e)**

Prepared from **6d** using general method D2. Desired product was obtained as a white solid in 94.9% yield (34 mg, 0.092 mmol).

1H NMR (500 MHz, METHANOL-*d*4, ppm) δ= 7.71 (1 H, dd, J = 12.89, 2.21 Hz), 7.27 (1 H, br d, J = 8.70 Hz), 7.05 (3 H, td, J = 8.77, 4.43 Hz), 6.94 – 6.88 (2 H, m), 3.49 (2 H, m), 3.11 (2 H, m), 2.80 – 2.74 (1 H, m), 2.11 (2 H, m), 2.06 – 1.91 (2 H, m); 13C NMR (126 MHz, METHANOL-*d*4, ppm) δ= 26.7 (2 C, s), 41.7 (1 C, s), 44.4 (2 C, s), 110.3 (1 C, d, J = 22.98 Hz), 117.3 (2 C, d, J = 23.90 Hz), 117.4 (1 C, br d, J = 3.68 Hz), 119.4 (1 C, d, J = 8.27 Hz), 123.3 (2 C, d, J = 1.84 Hz), 137.3 (1 C, d, J = 9.19 Hz), 141.1 (1 C, d, J = 11.95 Hz), 155.3 (1 C, d, J = 246.35 Hz), 155.4 (1 C, d, J = 1.84 Hz), 160.1 (1 C, d, J = 239.91 Hz), 174.3 (1 C, s); 19F NMR (470 MHz, METHANOL-*d*4, ppm) δ= -130.9 (1 F, br dd, J = 12.14, 8.67 Hz), -123.2 – -122.8 (1 F, m). HRMS (ESI): m/z calcd for C18H19F2N2O2 [*M*+H]+, 333.1409; found, 333.1401

***N*-(4-(4-Chlorophenoxy)-3-fluorophenyl)piperidine-4-carboxamide hydrochloride (7f)**

Prepared from **6e** using general method D2. Desired product was obtained as a white solid in 94.5% yield (30 mg, 0.078 mmol).

1H NMR (500 MHz, METHANOL-*d*4, ppm) δ= 7.72 (1 H, br d, J = 12.66 Hz), 7.32 – 7.26 (3 H, m), 7.10 (1 H, t, J = 8.85 Hz), 6.90 (2 H, d, J = 8.70 Hz), 3.49 (2 H, m), 3.10 (2 H, m), 2.76 (1 H, m), 2.12 (2 H, m), 2.05 – 1.92 (2 H, m); 13C NMR (126 MHz, METHANOL-*d*4, ppm) δ= 26.7 (2 C, s), 41.8 (1 C, s), 44.5 (2 C, s), 110.3 (1 C, d, J = 22.98 Hz), 117.8 (1 C, d, J = 3.68 Hz), 119.0 (2 C, s), 124.0 (1 C, s), 129.0 (1 C, s), 130.9 (2 C, s), 137.8 (1 C, d, J = 9.19 Hz), 140.2 (1 C, d, J = 11.95 Hz), 155.5 (1 C, d, J = 247.27 Hz), 158.3 (1 C, s), 174.3 (1 C, s); 19F NMR (470 MHz, METHANOL-*d*4, ppm) δ= -130.4 (1 F, br dd, J = 12.14, 8.67 Hz). HRMS (ESI): m/z calcd for C18H19ClFN2O2 [*M*+H]+, 349.1114; found, 349.11

***N*-(3-Chloro-4-(4-fluorophenoxy)phenyl)piperidine-4-carboxamide hydrochloride (7g)**

Prepared from **6f** using general method D2. Desired product was obtained as a pale yellow solid in 90.4% yield (22.5 mg, 0.058 mmol).

1H NMR (500 MHz, METHANOL-*d*4, ppm) δ= 7.89 (1 H, d, J = 2.44 Hz), 7.44 (1 H, dd, J = 8.77, 2.21 Hz), 7.10 – 7.04 (2 H, m), 6.99 (1 H, d, J = 8.70 Hz), 6.91 (2 H, dd, J = 9.00, 4.27 Hz), 3.49 (2 H, m), 3.10 (2 H, m), 2.78 – 2.71 (1 H, m), 2.14 – 2.08 (2 H, m), 2.03 – 1.93 (2 H, m); 13C NMR (126 MHz, METHANOL-*d*4, ppm) δ= 26.7 (2 C, s), 41.7 (1 C, s), 44.4 (2 C, s), 117.4 (2 C, d, J = 23.90 Hz), 119.9 (2 C, d, J = 8.27 Hz), 121.2 (1 C, s), 122.5 (1 C, s), 123.4 (1 C, s), 127.1 (1 C, s), 137.0 (1 C, s), 150.0 (1 C, s), 155.0 (1 C, d, J = 1.84 Hz), 160.2 (1 C, d, J = 239.91 Hz), 174.3 (1 C, s); 19F NMR (470 MHz, METHANOL-*d*4, ppm) δ= -122.8 – -122.7 (1 F, m). HRMS (ESI): m/z calcd for C18H19ClFN2O2 [*M*+H]+, 349.1114; found, 349.1116

***N*-(4-(4-Bromophenoxy)-3-chlorophenyl)piperidine-4-carboxamide hydrochloride (7h)**

Prepared from **6g** using general method D2. Desired product was obtained as a cream-colored solid in 95.7% yield (31 mg, 0.069 mmol).

1H NMR (500 MHz, METHANOL-*d*4, ppm) δ= 7.90 (1 H, d, J = 2.44 Hz), 7.49 – 7.42 (3 H, m), 7.06 (1 H, d, J = 8.85 Hz), 6.80 (2 H, d, J = 8.70 Hz), 3.48 (2 H, m), 3.09 (2 H, m), 2.75 (1 H, m), 2.11 (2 H, m), 2.04 – 1.91 (2 H, m); 13C NMR (126 MHz, METHANOL-*d*4, ppm) δ= 174.3 (1 C, s), 158.4 (1 C, s), 148.9 (1 C, s), 137.6 (1 C, s), 133.9 (2 C, s), 127.6 (1 C, s), 123.4 (1 C, s), 123.4 (1 C, s), 121.2 (2 C, s), 119.8 (1 C, s), 116.3 (1 C, s), 44.4 (2 C, s), 41.7 (1 C, s), 26.7 (2 C, s). HRMS (ESI): m/z calcd for C18H19BrClN2O2 [*M*+H]+, 409.0313; found, 409.0317

***N*-(3-Chloro-4-(4-iodophenoxy)phenyl)piperidine-4-carboxamide hydrochloride (7i)**

Prepared from **6h** using general method D2. Desired product was obtained as a white solid in quantitative yield (34.4 mg, 0.070 mmol).

1H NMR (500 MHz, METHANOL-*d*4, ppm) δ= 7.90 (1 H, d, J = 2.29 Hz), 7.63 (2 H, d, J = 8.70 Hz), 7.47 (1 H, dd, J = 8.85, 2.29 Hz), 7.07 (1 H, d, J = 8.85 Hz), 6.69 (2 H, d, J = 8.70 Hz), 3.49 (2 H, m), 3.10 (2 H, m), 2.75 (1 H, m), 2.12 (2 H, m), 2.04 – 1.96 (2 H, m); 13C NMR (126 MHz, METHANOL-*d*4, ppm) δ= 174.3 (1 C, s), 159.2 (1 C, s), 148.8 (1 C, s), 140.0 (2 C, s), 137.6 (1 C, s), 127.7 (1 C, s), 123.5 (1 C, s), 123.4 (1 C, s), 121.2 (1 C, s), 120.2 (2 C, s), 86.3 (1 C, s), 44.4 (2 C, s), 41.7 (1 C, s), 28.1 (2 C, s). HRMS (ESI): m/z calcd for C18H19ClIN2O2 [*M*+H]+, 457.0174; found, 457.0176

***N*-(3-Chloro-4-(4-chlorophenoxy)phenyl)-1-methylpiperidine-4-carboxamide (8)**

Prepared from **5a** using general method C1. Desired product was obtained as an off-white solid in 53% yield (40 mg, 0.11 mmol).

1H NMR (500 MHz, METHANOL-*d*4, ppm) δ= 7.87 (1 H, d, J = 2.59 Hz), 7.45 (1 H, dd, J = 8.85, 2.59 Hz), 7.33 – 7.28 (2 H, m), 7.05 (1 H, d, J = 8.85 Hz), 6.88 – 6.84 (2 H, m), 2.96 (2 H, m), 2.35 (1 H, m), 2.28 (3 H, s), 2.09 (2 H, m), 1.90 – 1.84 (4 H, m); 13C NMR (126 MHz, METHANOL-*d*4, ppm) δ= 176.3 (1 C, s), 158.0 (1 C, s), 148.8 (1 C, s), 137.9 (1 C, s), 130.9 (2 C, s), 129.0 (1 C, s), 127.6 (1 C, s), 123.4 (1 C, s), 123.3 (1 C, s), 121.2 (1 C, s), 119.4 (2 C, s), 56.1 (1 C, s), 46.5 (1 C, s), 44.2 (1 C, s), 29.7 (1 C, s). HRMS (ESI): calcd for C19H21Cl2N2O2 [*M*+H]+, 379.0974; found, 379.0973

***N*-(3-Chloro-4-(4-chlorophenoxy)phenyl)tetrahydro-2H-pyran-4-carboxamide (9)**

Prepared from **5a** using general method C1. Desired product was obtained as a white solid in 37% yield (27 mg, 0.074 mmol).

1H NMR (500 MHz, METHANOL-*d*4, ppm) δ= 7.91 – 7.84 (1 H, m), 7.50 – 7.41 (1 H, m), 7.35 – 7.27 (2 H, m), 7.07 (1 H, s), 6.90 – 6.83 (2 H, m), 4.05 – 3.97 (2 H, m), 3.49 (2 H, m), 2.63 (1 H, m), 1.90 – 1.72 (4 H, m); 13C NMR (126 MHz, METHANOL-*d*4, ppm) δ= 176.0 (1 C, s), 158.0 (1 C, s), 148.9 (1 C, s), 137.9 (1 C, s), 130.9 (2 C, s), 129.1 (1 C, s), 127.6 (1 C, s), 123.4 (2 C, s), 121.2 (1 C, s), 119.4 (2 C, s), 68.4 (2 C, s), 43.9 (1 C, s), 30.4 (2 C, s). HRMS (ESI): m/z calcd for C18H18Cl2NO3 [M + H]+, 366.0658; found, 366.0641

***N*-(3-Chloro-4-(4-chlorophenoxy)phenyl)benzamide (10)**

Prepared from **5a** using general method C1. Desired product was obtained as an off-white solid in 61% yield (44 mg, 0.12 mmol).

1H NMR (500 MHz, METHANOL-*d*4, ppm) δ= 8.02 (1 H, d, J = 2.44 Hz), 7.94 (2 H, d, J = 7.17 Hz), 7.65 (1 H, dd, J = 8.77, 2.52 Hz), 7.60 (1 H, t, J = 7.32 Hz), 7.52 (2 H, t, J = 7.55 Hz), 7.39 – 7.26 (2 H, m), 7.11 (1 H, d, J = 8.70 Hz), 6.96 – 6.85 (2 H, m); 13C NMR (126 MHz, METHANOL-*d*4, ppm) δ= 169.0 (1 C, s), 158.0 (1 C, s), 149.3 (1 C, s), 137.8 (1 C, s), 136.1 (1 C, s), 133.3 (1 C, s), 130.9 (2 C, s), 129.8 (2 C, s), 129.1 (1 C, s), 128.8 (2 C, s), 127.5 (1 C, s), 124.3 (1 C, s), 123.3 (1 C, s), 122.2 (1 C, s), 119.5 (2 C, s). HRMS (ESI): m/z calcd for C19H12Cl2NO2 [*M* – H]+, 356.0251; found,356.025

***N*-(3-Chloro-4-(4-chlorophenoxy)phenyl)piperidine-3-carboxamide hydrochloride (11)**

This compound was prepared from **5a** using general methods C1 and D2 without intermediate purification. Desired product was obtained as a white solid in 69.6% yield (over two steps) (50 mg, 0.137 mmol).

1H NMR (500 MHz, METHANOL-*d*4, ppm) δ= 7.93 (1 H, d, J = 2.59 Hz), 7.47 (1 H, dd, J = 8.85, 2.44 Hz), 7.38 – 7.25 (2 H, m), 7.07 (1 H, d, J = 8.85 Hz), 6.90 – 6.84 (2 H, m), 3.38 – 3.32 (2 H, m), 3.27 – 3.12 (2 H, m), 2.99 – 2.91 (1 H, m), 2.18 – 1.81 (4 H, m); 13C NMR (126 MHz, METHANOL-*d*4, ppm) δ= 173.3 (1 C, s), 157.9 (1 C, s), 149.2 (1 C, s), 137.4 (1 C, s), 130.9 (2 C, s), 129.2 (1 C, s), 127.6 (1 C, s), 123.4 (1 C, s), 123.4 (1 C, s), 121.2 (1 C, s), 119.5 (2 C, s), 46.2 (1 C, s), 45.3 (1 C, s), 40.6 (1 C, s), 27.4 (1 C, s), 22.0 (1 C, s). HRMS (ESI): m/z calcd for C18H19Cl2N2O2 [*M*+H]+, 365.0818; found, 365.0809

***N*-(3-Chloro-4-(4-chlorophenoxy)phenyl)azepane-4-carboxamide hydrochloride (12)**

This compound was prepared from **5a** using general methods C1 and D2 without intermediate purification. Desired product was obtained as an off-white solid in 61.6% yield (over two steps) (46 mg, 0.121 mmol).

1H NMR (500 MHz, METHANOL-*d*4, ppm) δ= 7.91 (1 H, d, J = 2.29 Hz), 7.46 (1 H, dd, J = 8.77, 2.37 Hz), 7.33 – 7.29 (2 H, m), 7.06 (1 H, d, J = 8.70 Hz), 6.90 – 6.83 (2 H, m), 3.52 – 3.42 (2 H, m), 3.30 – 3.21 (3 H, m), 2.87 – 2.78 (1 H, m), 2.24 – 2.05 (4 H, m), 2.00 – 1.88 (2 H, m); 13C NMR (126 MHz, METHANOL-*d*4, ppm) δ= 176.2 (1 C, s), 157.9 (1 C, s), 149.1 (1 C, s), 137.6 (1 C, s), 130.9 (2 C, s), 129.1 (1 C, s), 127.6 (1 C, s), 123.4 (1 C, s), 123.4 (1 C, s), 121.2 (1 C, s), 119.5 (2 C, s), 48.0 (1 C, s), 46.0 (1 C, s), 45.4 (1 C, s), 31.2 (1 C, s), 28.7 (1 C, s), 24.4 (1 C, s). HRMS (ESI): m/z calcd for C19H21Cl2N2O2 [*M*+H]+, 379.0975; found, 379.0973

***N*-(3-Chloro-4-(4-chlorophenoxy)phenyl)-2-(piperidin-4-yl)acetamide (13)**

This compound was prepared from **5a** using general methods C1 and D2 without intermediate purification, and subsequently neutralized. Desired product was obtained as a white solid in 56.3% yield (over two steps) (42 mg, 0.110 mmol).

1H NMR (500 MHz, CHLOROFORM-*d*, ppm) δ= 8.64 (br s, 1 H), 7.78 (d, J = 1.22 Hz, 1 H), 7.49 – 7.41 (m, 1 H), 7.26 – 7.23 (m, 3 H), 6.93 (d, J = 8.70 Hz, 1 H), 6.81 (d, J = 8.85 Hz, 2 H), 3.37 (br s, 2 H), 2.88 (br s, 2 H), 2.42 – 2.33 (m, 2 H), 2.21 (br s, 1 H), 1.93 (br d, 2 H), 1.61 (br s, 2 H); 13C NMR (126 MHz, CHLOROFORM-*d*, ppm) δ= 169.8 (s, 1 C), 155.9 (s, 1 C), 147.9 (s, 1 C), 135.4 (s, 1 C), 129.7 (s, 2 C), 128.1 (s, 1 C), 126.3 (s, 1 C), 122.2 (s, 1 C), 121.7 (s, 1 C), 119.7 (s, 1 C), 118.4 (s, 2 C), 43.7 (s, 2 C), 43.1 (s, 1 C), 31.4 (s, 1 C), 28.6 (s, 2 C). HRMS (ESI): m/z calcd for C19H21Cl2N2O2 [*M*+H]+, 379.0975; found, 379.0978

***N*-(3-Chloro-4-(4-chlorophenoxy)phenyl)-3-(piperidin-4-yl)propenamide (14)**

This compound was prepared from **5a** using general methods C1 and D2 without intermediate purification, and subsequently neutralized. Desired product was obtained as a white solid in 74.9% yield (over two steps) (58 mg, 0.147 mmol).

1H NMR (500 MHz, CHLOROFORM-*d*, ppm) δ= 9.65 – 9.11 (1 H, m), 8.49 (1 H, br s), 7.77 (1 H, s), 7.40 (1 H, br d, J = 8.70 Hz), 7.25 (2 H, d, J = 8.70 Hz), 6.94 (1 H, d, J = 8.85 Hz), 6.82 (2 H, d, J = 8.70 Hz), 3.39 (2 H, m), 2.86 (2 H, m), 2.40 (2 H, m), 1.88 (2 H, m), 1.74 (2 H, m), 1.70 – 1.53 (3 H, m); 13C NMR (126 MHz, CHLOROFORM-*d*, ppm) δ= 171.3 (1 C, s), 155.9 (1 C, s), 147.9 (1 C, s), 135.3 (1 C, s), 129.7 (2 C, s), 128.1 (1 C, s), 126.3 (1 C, s), 122.2 (1 C, s), 121.7 (1 C, s), 119.6 (1 C, s), 118.4 (2 C, s), 44.1 (2 C, s), 33.5 (1 C, s), 33.3 (1 C, s), 31.0 (1 C, s), 28.2 (2 C, s). HRMS (ESI): m/z calcd for C20H23Cl2N2O2 [*M*+H]+, 393.1131; found, 393.1118

***N*-(3-Chloro-4-(4-chlorophenoxy)phenyl)-5-(1H-tetrazol-1-yl)-1H-pyrazole-4-carboxamide (15)**

Prepared from **5a** using general method C1. Desired product was obtained as a pale-yellow solid in 44% yield (37 mg, 0.089 mmol).

1H NMR (500 MHz, METHANOL-*d*4, ppm) δ= 8.51 (1 H, s), 7.89 (1 H, d, J = 2.14 Hz), 7.54 (1 H, dd, J = 8.77, 2.21 Hz), 7.32 (1 H, d, J = 9.00 Hz), 7.07 (1 H, d, J = 8.85 Hz), 6.88 (1 H, d, J = 8.85 Hz), 4.59 (1 H, br s); 13C NMR (126 MHz, METHANOL-*d*4, ppm) δ= 161.7 (1 C, br s), 157.9 (1 C, s), 149.2 (1 C, s), 145.9 (1 C, s), 143.1 (1 C, br s), 137.4 (1 C, s), 134.3 (1 C, br s), 130.9 (2 C, s), 129.1 (1 C, s), 127.5 (1 C, s), 123.9 (1 C, s), 123.3 (1 C, s), 121.8 (1 C, s), 119.5 (2 C, s), 111.7 (1 C, s). HRMS (ESI): calcd for C17H10Cl2N7O2 [*M* – H]+, 414.0278; found,414.0283

**Methyl 3-chloro-4-(4-chlorophenoxy)benzoate (18)**

Methyl 3-chloro-4-fluorobenzoate (488 mg, 2.59 mmol, 1 eq.), 4-chloro phenol (365.93 mg, 2.85 mmol, 1.1 eq.) and cesium carbonate (1.26 g, 3.88 mmol, 1.5 eq.) were dissolved in DMSO (2.57 mL, 1 mol/L) and heated to 100°C for 72 hours. Upon disappearance of the starting material, the reaction was cooled, and water (20 mL) was added to the reaction mixture. The resulting solution was extracted with ethyl acetate (3 x). The organic layer washed with water (20 mL) then saturated aqueous NaCl solution (30 mL), dried over magnesium sulfate, filtered and concentrated by rotary evaporation. The crude product was purified by flash column chromatography (0–100% ethyl acetate in cyclohexane) to yield the product (164 mg, 0.551 mmol, 21.3%).

1H NMR (500 MHz, CHLOROFORM-*d*, ppm) δ= 8.14 (1 H, d, J = 1.98 Hz), 7.86 (1 H, dd, J = 8.62, 2.06 Hz), 7.36 – 7.32 (2 H, m), 7.00 – 6.94 (2 H, m), 6.89 (1 H, d, J = 8.54 Hz), 3.91 (3 H, s); 13C NMR (126 MHz, CHLOROFORM-*d*, ppm) δ= 165.3 (1 C, s), 156.5 (1 C, s), 154.0 (1 C, s), 132.3 (1 C, s), 130.0 (2 C, s), 129.7 (1 C, s), 129.5 (1 C, s), 126.1 (1 C, s), 124.8 (1 C, s), 120.5 (2 C, s), 118.9 (1 C, s), 52.3 (1 C, s)

**3-Chloro-4-(4-chlorophenoxy)benzoic acid (19)**

Methyl 3-chloro-4-(4-chlorophenoxy)benzoate (**18**) (164 mg, 0.551 mmol) was dissolved in 1,4-dioxane (1 mL) and 2M NaOH solution (1 mL), and the resulting reaction mixture was heated to 50 °C overnight. The reaction mixture was adjusted to pH 4 using 2 mmol/L HCl solution then extracted using a mixture of chloroform and iso-propanol (3:1, 3 x). The organic layer washed with saturated aqueous NaCl solution (20 mL), dried over magnesium sulfate, filtered and concentrated by rotary evaporation to yield the product as a clear solid/oil without any further purification (130 mg, 0.459 mmol, 83.2%).

1H NMR (500 MHz, METHANOL-*d*4, ppm) δ= 8.12 (1 H, d, J = 1.98 Hz), 7.92 (1 H, dd, J = 8.54, 1.98 Hz), 7.43 – 7.38 (2 H, m), 7.05 – 6.98 (3 H, m); 13C NMR (126 MHz, METHANOL-*d*4, ppm) δ= 168.0 (1 C, s), 157.8 (1 C, s), 156.1 (1 C, s), 133.5 (1 C, s), 131.4 (2 C, s), 131.3 (1 C, s), 130.8 (1 C, s), 128.8 (1 C, s), 126.2 (1 C, s), 121.6 (2 C, s), 120.9 (1 C, s)

***tert*-Butyl 4-((3-chloro-4-(4-chlorophenoxy)benzamido)methyl)piperidine-1-carboxylate (20)**

Prepared using **20** and tert-butyl 4-(aminomethyl)piperidine-1-carboxylate using general procedure C1. Desired product was obtained as a clear oil in 72.1% yield (61 mg, 0.127 mmol).

1H NMR (500 MHz, CHLOROFORM-*d*, ppm) δ= 7.89 (1 H, d, J = 1.98 Hz), 7.63 (1 H, dd, J = 8.54, 2.14 Hz), 7.33 (2 H, d, J = 7.72 Hz), 6.96 – 6.92 (3 H, m), 6.34 (1 H, br t, J = 5.87 Hz), 4.16 – 4.09 (2 H, m), 3.35 (2 H, m), 2.73 – 2.65 (2 H, m), 1.85 – 1.76 (1 H, m), 1.73 (2 H, m), 1.45 (9 H, s), 1.24 – 1.13 (2 H, m); 13C NMR (126 MHz, CHLOROFORM-*d*, ppm) δ= 165.7 (1 C, s), 155.1 (1 C, s), 154.8 (1 C, s), 154.5 (1 C, s), 130.9 (1 C, s), 130.0 (2 C, s), 129.7 (1 C, s), 129.4 (1 C, s), 126.8 (1 C, s), 125.5 (1 C, s), 120.0 (2 C, s), 119.3 (1 C, s), 79.5 (1 C, s), 45.5 (2 C, s), 43.5 (1 C, s), 36.4 (1 C, s), 29.8 (2 C, s), 28.4 (3 C, s)

**3-Chloro-4-(4-chlorophenoxy)-*N*-(piperidin-4-ylmethyl)benzamide (21)**

Prepared from **20** using general procedure D2 and subsequently neutralized. Desired product was obtained as an off-white solid in 89% yield (43 mg, 0.113 mmol).

1H NMR (500 MHz, METHANOL-*d*4, ppm) δ= 8.00 (1 H, d, J = 2.14 Hz), 7.76 (1 H, dd, J = 8.54, 2.14 Hz), 7.42 – 7.36 (2 H, m), 7.04 (1 H, d, J = 8.54 Hz), 7.01 – 6.98 (2 H, m), 3.30 – 3.23 (2 H, m), 3.10 (2 H, m), 2.62 (2 H, m), 1.84 – 1.72 (3 H, m), 1.29 – 1.20 (2 H, m); 13C NMR (126 MHz, METHANOL-*d*4, ppm) δ= 168.3 (1 C, s), 156.4 (1 C, s), 156.4 (1 C, s), 132.6 (1 C, s), 131.3 (1 C, s), 131.3 (2 C, s), 130.5 (1 C, s), 128.8 (1 C, s), 126.6 (1 C, s), 121.2 (2 C, s), 120.9 (1 C, s), 46.9 (1 C, s), 46.6 (2 C, s), 37.5 (1 C, s), 31.2 (2 C, s). HRMS (ESI): calcd for C19H21Cl2N2O2 [*M*+H]+, 379.0974; found,379.0969

Protein expression and purification

Δ*kp*DXPS, Δ*pa*DXPS, Δ*mt*DXPS and *dr*DXPS were expressed and purified following previously reported protocols.7–9

WT and Δ*ec*DXPS expression and purification

The *ec*DXPS and Δ*ec*DXPS constructs were expressed in BL21 DE3 cells at 37 °C. Cells were grown until the optical density at 600 nm reached 0.6, at which point 100 µM IPTG was added to induce *dxs* overexpression. The temperature was reduced to 25 °C, and cultures were grown overnight for 20 h before centrifugation at 18,000 x g at 4 °C for 12 min. The cell pellets were flash frozen in liquid nitrogen and stored at –80 °C until purification. Recombinant DXPS was purified using Ni2+ affinity and anion exchange protocols similar to those previously published.10,11 The cell pellet was resuspended in lysis buffer (400 mmol/L NaCl; 50 mmol/L Tris, pH 8; 10% glycerol; 1 mmol/L phenylmethylsulfonyl fluoride (PMSF) containing 1 mmol/L Tris(2-carboxyethyl)phosphine (TCEP), 1 mmol/L ThDP, 1X protease inhibitor cocktail (PIC), 20 mmol/L MgCl2, and 6 µL DNase/40 mL), and was passed through a microfluidizer 4 times to lyse cells. Lysate was centrifuged at 39,000 x g at 4 °C for 30 min. The supernatant was incubated with 5 mL of lysis buffer-washed Ni-NTA resin. Imidazole was added to a final concentration of 5 mmol/L and rotated for one hour in a 4 °C cold room to reduce nonspecific protein binding to the resin. DXPS-bound Ni-NTA resin was centrifuged at 4,000 x g at 4 °C for 10 min, and the supernatant was removed. The resin was added to a gravity column where the resin was washed with 8 mL of 5, 20, 40, and 60 mmol/L imidazole, prepared in lysis buffer, to remove nonspecific binders. DXPS was eluted in 4 mL fractions of 100, 250, and 500 mmol/L imidazole in lysis buffer solutions. The protein content in each fraction containing DXPS was evaluated by NanoDrop spectrophotometer to determine which fractions should be pooled (16 mL total). Pooled fractions were then diluted 8-fold into anion exchange buffer A (50 mmol/L Tris, pH 8, and 10% glycerol) for a final volume of 128 mL. The solution was centrifuged 39,000 x g at 4 °C for 30 min to remove any precipitate. The sample was loaded onto the FPLC containing two 5 mL Cytiva HiTrap HP Q columns (10 mL total) maintaining a 2 mL/min flow rate. Two column volumes (20 mL) of anion exchange buffer A containing 1 mmol/L TCEP were passed through the column. DXPS was then eluted using a 0–100% gradient of anion exchange buffer B (50 mmol/L Tris, pH 8; 10% glycerol; 1 mol/L NaCl; and 1 mmol/L TCEP) in buffer A over 10 column volumes maintaining a 2.5 mL/min flow rate (100 mL total in 40 min). The eluted protein was pooled and dialyzed overnight at 4 °C in dialysis buffer (50 mmol/L Tris, pH 8; 10 mmol/L MgCl2; 100 mmol/L NaCl, 10% glycerol). In the morning, sample was dialyzed against a fresh 1 L of dialysis buffer for 4 h at 4 °C. DXPS concentration was determined by Bradford assay. The sample was flash frozen in liquid nitrogen, and stored at -80 °C.

Inhibition assays

Inhibition of Δ*kp* and Δ*pa*DXPS by DXPS-IspC coupled assay

To measure DXPS activity, a coupled spectrophotometric enzyme assay was adapted from the assay protocol described in the literature.12 A continuous kinetic photometric assay was used to measure DXPS activity. NADPH consumption by the auxiliary enzyme 1-deoxy-D-xylulose 5-phosphate reductoisomerase (IspC) was measured in a microplate reader (PHERAstar), monitoring the absorbance at 340 nm. In all cases, IspC concentration was kept in excess (1 μmol/L) to ensure DXPS is the only rate-limiting enzyme in the reaction mix. In the inhibition assays, ThDP concentration was kept around 4x *K*m (400 nM) to ensure the enzyme reaches maximum velocity while allowing competitive inhibition. For inhibition studies, DXPS activity was analyzed at RT for 30 min as follows; reaction mixture A (100 mmol/L HEPES pH 7.5, 100 mmol/L NaCl, 1 mmol/L MgCl2, 0.5 μmol/L NAPDH, 1 μmol/L IspC, 400 nM ThDP, and 0.13 μmol/L, 0.15 μmol/L and 0.2 μmol/L ∆*dr*DXPS, ∆*pa*DXPS and ∆*kp*DXPS respectively) was pre-incubated with the inhibitor at 37 °C for 5 min in 10% DMSO. The reaction was then started by adding mixture B (100 mmol/L HEPES pH 7.5, 100 mmol/L NaCl, 2 mmol/L D/L-glyceraldehyde-3-phosphate and 2 mmol/L pyruvate. Blank correction and linear fitting of the absorption data were performed using the program Origin 2019 (OriginLab).

Determining kinetic parameters for *Δec*DXPS and *K*i against WT and *Δec*DXPS by DXPS-IspC coupled assay

*Escherichia coli* DXP synthase activity was measured using a spectrophotometric DXPS-IspC coupled assay.11 DXPS reactions were performed in a 96-well plate, and changes in the absorbance were measured by an Epoch BioTek2 microplate reader. Enzyme solutions (180 µL) contained DXPS (100 nmol/L final concentration), IspC (2 μmol/L final concentration), and NADPH (200 μmol/L final concentration) in buffer (100 mmol/L HEPES pH 8, 2mmol/L MgCl2, 5mmol/L NaCl, and 1mmol/L ThDP). The enzyme mix was incubated at 25 °C for 5 min. DXP formation was initiated with the addition of 20 µL of a 10x solution containing both substrates (200 µL final volume). Kinetic parameters (*K*mpyruvate, *K*md-GAP, and *k*cat) were determined by varying one substrate (pyruvate or d/l-GAP over the range 0–1,000 and 0–2,000 μmol/L, respectively) while holding the other substrate at a constant concentration (500 μmol/L for pyruvate and 1,000 μmol/L for d/l-GAP). The depletion of NADPH was monitored at 340 nm at 25 °C for 10 min, with absorbance measurements every 20 sec (*ec*DXPS) or 14 sec (Δ*ec*DXPS). The initial velocity of NADPH disappearance was calculated to determine the rate of DXP formation. The initial rate of DXP formation was plotted against the substrate concentration and fit to equation 1, where vi is the initial velocity, Vmax is the maximum velocity, S is the substrate concentration, and *K*m is the substrate concentration at which the velocity is half the maximum velocity.

eq 1

Two technical replicates were performed and repeated for a total of four replicates for each varied substrate experiment. Reported kinetic parameters in Figures S1a,b represent the mean and standard error from four replicates. The *k*cat reported in Table 4 represents the mean and standard error of the combined experimentally determined values from varying pyruvate and d-GAP from a total of eight replicates. A Welch’s t-test was used determine the statistical relevance of the *k*cat difference observed between the WT and Δ*ec* enzymes.

The apparent *K*i for compound **14** was determined against full-length and truncated DXPS (Δ*ec*DXPS) using the DXPS-IspC coupled assay described above, with minor modifications. WT or Δ*ec*DXPS (100 nmol/L) and IspC (2 μmol/L) prepared in, 5 mmol/L NaCl, 2 mmol/L MgCl2, 0.2 μmol/L ThDP, and 200 μmol/L NADPH) were mixed with 20 µL of 5x stocks of compound **14** in 3:1 100 mmol/L HEPES pH 8/DMSO (to achieve final concentrations of 0, 20, 40, 60, and 80 μmol/L for *Ec*DXPS, or 0, 5, 10, 20, and 40 µM for Δ*ec*DXPS). After enzyme-inhibitor mixtures were pre-incubated for 5 min at 25 °C, enzymatic reactions were initiated by addition of 20 µL of 10x substrate stocks to give a final reaction volume of 200 µL. The final concentration of d-GAP was held constant at 300 µmol/L, while the final concentration of pyruvate was varied between 5 – 500 µmol/L at each inhibitor concentration. The initial velocity of NADPH consumption was determined by monitoring the depleting absorbance at 340 nm and was used to determine the rate of DXP formation. Initial rates of DXP production were plotted as a function of pyruvate concentration. Apparent *K*i values were calculated using equation 2, where *v*0 is the initial velocity of the reaction, *V*max is the maximum velocity, I is the inhibitor concentration, and *K*i is the concentration of inhibitor required for half-maximal inhibition.13

eq 2

The calculated *K*i represents the mean and standard error determined from 3 technical replicates. Model discrimination analysis utilizing the Akaike information criterion identified noncompetitive inhibition as the best fit model for the experimental data (Figure S1c).


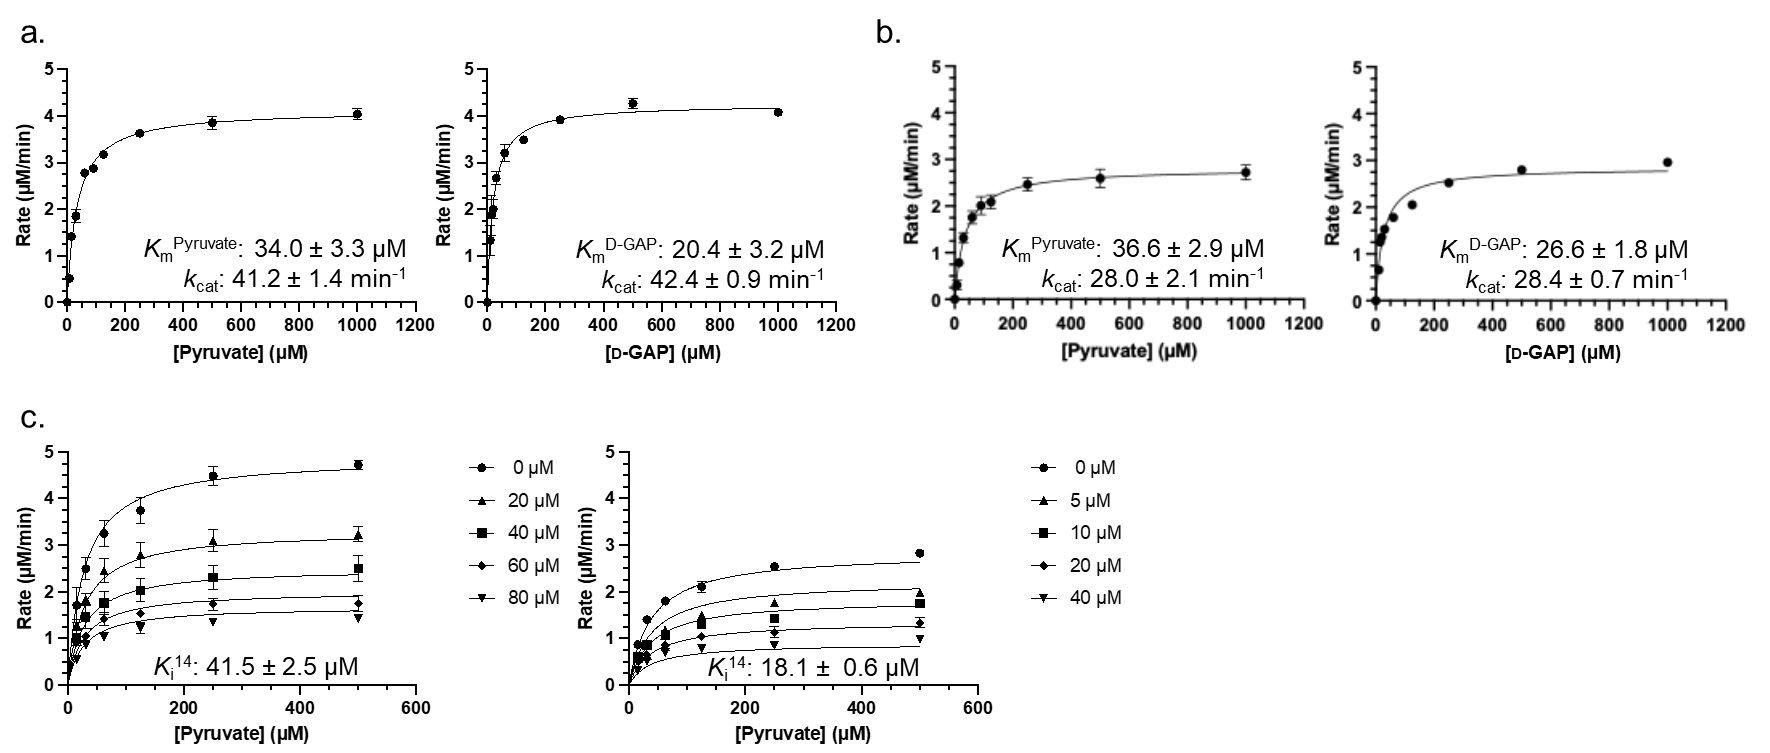


**Figure S1.** DXP formation kinetics comparison between WT (a) and Δ*ec*DXPS (b) varying either pyruvate (left) or d-GAP (right) substrate. Errors in *K*m and *k*cat represent standard error determined from four experiments. c. Classical *K*i determination of **14** potency on WT (left) and Δ*Ec*DXPS (right) keeping inhibitor concentration constant and varying pyruvate. *K*i errors represent the standard error from three independent replicates. All error bars represent the standard error of the mean.

DXPS HPLC-MS/MS assay to determine inhibitory potency

The following protocol was adapted and optimized from Liang et al.14

Two buffer solutions are prepared (Buffer A: 100 mmol/L 2-amino-2-(hydroxymethyl)propane-1,3-diol (Tris)-HCl pH 7.6, 8 µmol/L ThDP, 200 µmol/L MgCl2, 0.7 µmol/L ∆*pa*DXPSor ∆*kp*DXPS. Buffer B: 800 µmol/L D/L-GAP, 400 µmol/L pyruvate). Either single concentrations or dilution series of compounds were prepared on a 96-well plate in DMSO. Columns 1 and 2, 11 and 12 were DMSO only for blank and positive control, respectively. On a second 96-well plate 100 µL Tris-HCl buffer were filled in well 1 and 2 of every row and 100 µL of Buffer A in wells 3–12. Then, 10 µL of each well from the compound plate were pipetted to this new plate, and the mixture incubated at 25 °C for 10 min. To start the reaction, 100 µL of buffer B were added to each well simultaneously, and the plate was incubated at 37 °C for 25 min. During that time, a 2 mmol/L solution of DMB in 1 mol/L HCl (including 3 mmol/L NaHSO4 and 0.1 mmol/L β-mercaptoethanol) was prepared, and 50 µL of this solution was transferred into each well of a new plate. The assay plate was heated to 95 °C for 5 min, centrifuged at 10 °C for 3 min and 4,000 rpm. Then, 50 µL of the supernatant were added to the DMB plate. This plate was incubated at 95 °C for 1 h. A fourth plate was prepared with 198 µL of acetonitrile and 2 µL of the DMB solution were added.

For the HPLC analysis, an Ultimate 3000-MSQ LCMS system (Thermo Fisher Scientific) consisting of a pump and autosampler was used with the following conditions:

- Column: NUCLEODUR C18 Pyramid, 3 µm, 150*2 mmol/L, Macherey-Nagel;
- Temperature: 40 °C;
- Injection volume: 3 μL;
- Flow rate: 600 μL min–1;
- Solvent A: water + 0.1% formic acid;
- Solvent B: acetonitrile + 0.1% formic acid;
- Gradient: 90% A at 0 min, 90%–5% A from 0.4 min to 1.10 min, 5% A until 3.70 min, 5%–90% A from 3.70 to 4.50 min.

A TSQ Quantum Access Max (Thermo Fisher Scientific, Waltham, MA, USA) mass spectrometer was used with the following instrument parameters:

- Spray voltage 3500 V,
- Vaporizer temperature 370 °C,
- Sheath gas pressure 60 psi,
- Aux gas pressure 20 psi,
- Capillary temperature 270 °C,
- Collision pressure 1.5 mTorr,
- Positive ionization mode,
- Scan type: MRM.

For AQ analyte reaction-monitoring parameters see **Table S1**. Data acquisition and quantification were performed using the Xcalibur software.

**Table S1.** LC-ESI-MS/MS reaction monitoring parameters of AQ analytes in positive ionization mode.

|  | Precursor ion m/z | Product ion m/z | Collision Energy (V) | Tube Lens Offset (V) | Retention Time (min) |
| --- | --- | --- | --- | --- | --- |
| DMB-py | 205.013 | 90.110  187.000 | 31  22 | 88  88 | 1.9 |

Percent inhibition was calculated using the blank peak area as the upper limit (no pyruvate consumption corresponding to full inhibition) and the control peak area as the lower limit (no inhibition and maximum pyruvate consumption).

Single-point determinations were performed at least two times and only compounds with an average inhibition of >50% were used for IC50 experiments. IC50 calculations were performed in OriginPro 2020b15 using nonlinear sigmoidal growth fitting while fixing 100% inhibition as the upper limit. The average of the two independent IC50 determinations was calculated to determine the IC50.

Crystallography

For the co-crystallization of Δ*pa*DXPS, the protein was concentrated to 15 mg/mL and incubated with 1 mM compound **14** for 2 h at room temperature prior to screen preparation. Crystallization trials were carried out in hanging drop plates by mixing equal volumes of protein-ligand solution with a reservoir solution containing 100 mM HEPES pH 7.5, 10% (w/v) PEG-8000, and 150 mM calcium acetate. Diffraction quality crystals of Δ*pa*DXPS in complex with compound **14** appeard after 18 days of incubation at 291 K.

Crystals were cryo-protected using 32% glycerol, mounted in a cryoloop (Hampton Research) and flash-frozen in liquid nitrogen. Data were collected at 100 K using the SLS beamline X06DA at the Swiss Light Source (Paul Scherrer Institute, Switzerland) at a wavelength of 0.87313 Å using a DECTRIS PILATUS 2M-F detector. Recorded data were processed by using AIMLESS16 in CCP4i.17 The structure was solved by molecular replacement using phenix.phaser18,19 and the published coordinates of Δ*pa*DXPS (PDB ID: 8A29) were used as search model.8 The structure underwent several rounds of manual rebuild in COOT20 and further refinement was carried out by using phenix.refine (PHENIX version 1.21.1_5286)21 to obtain final structure. Final PDB coordinates were analyzed using MolProbity22, figures were rendered using PyMOL (Open Source version v3.1.0)23 and the structure was deposited in the Protein Data Bank as entry **9QY6**.

**Table S2.** Data collection and refinement statistics.

|  | Δ*pa*DXPS + 14 |
| --- | --- |
| PDB code | 9QY6 |
| Data collection |  |
| Space group | P 21 21 21 |
| Cell dimensions |  |
| *a*, *b*, *c* (Å) | 77.67, 115.11, 132.18 |
| α, β, γ (°) | 90.0, 90.0, 90.0 |
| Wavelength (Å) | 0.87313 |
| Resolution (Å) | 37.89 – 1.91 (1.94 – 1.91) |
| *CC*1/2 | 0.990 (0.425) |
| *I* / σ*I* | 6.6 |
| Completeness (%) | 97.21 |
| Redundancy | 4.2 |
|  |  |
| Refinement |  |
| Resolution (Å) | 37.89 – 1.91 |
| No. reflections | 90216 (4149) |
| *R*work / *R*free | 0.162 / 0.187 |
| No. atoms |  |
| Protein | 17229 |
| Ligand/ion | 202 |
| Water | 1148 |
| *B*-factors |  |
| Protein | 27.15 |
| Ligand/ion | 37.38 |
| Water | 34.75 |
| R.m.s. deviations |  |
| Bond lengths (Å) | 0.005 |
| Bond angles (°) | 0.777 |
| MolProbity clash score | 4.92 |
| Ramachandran (%) |  |
| Favoured | 96.79 |
| Allowed | 3.21 |
| Outliers | 0.00 |

Statistics for the highest resolution shell are shown in parentheses.


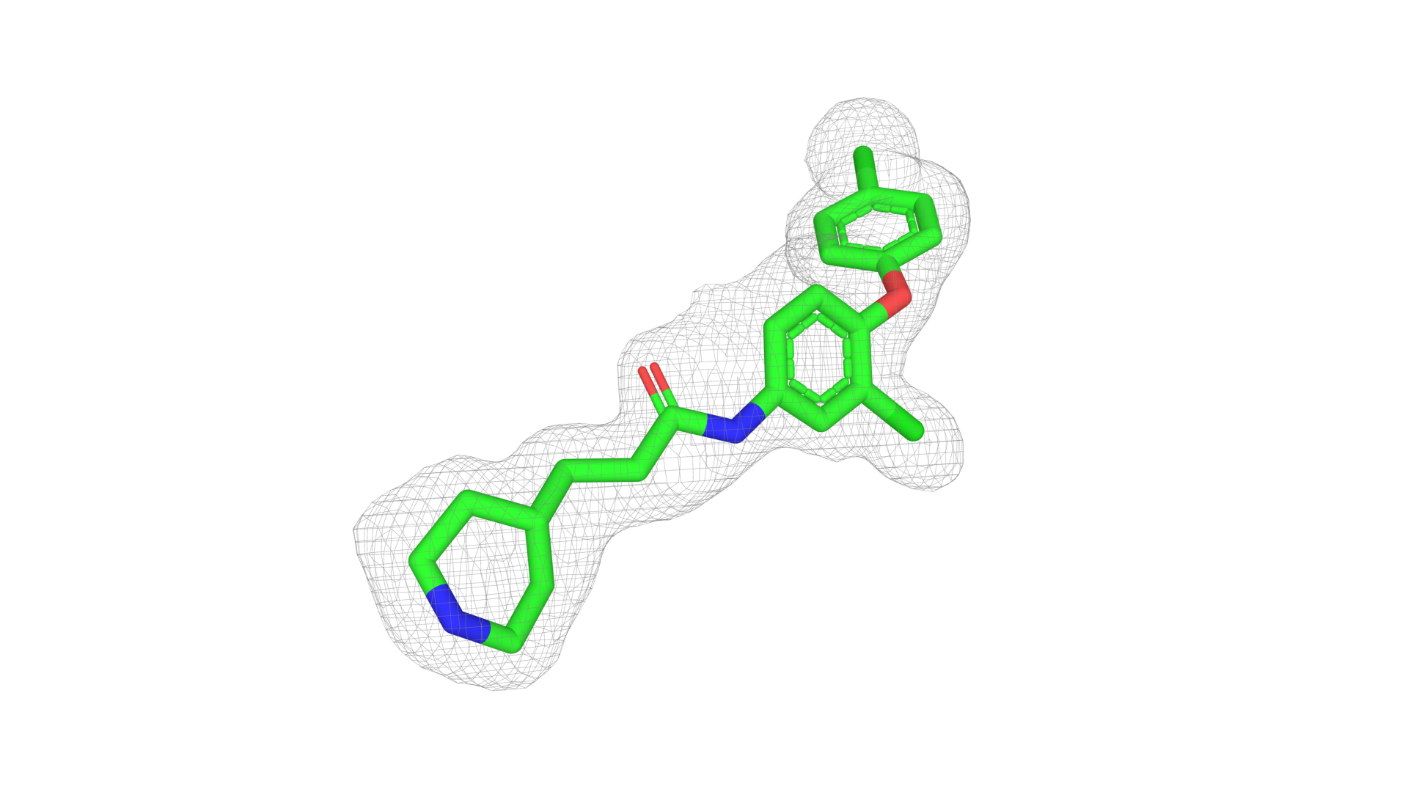


**Figure S2** Polder map (grey isomesh) of the compounds 14 (green) contoured at a level of 3 𝜎.

Binding Pocket Conservation Analysis

DXPS protein sequences from *P. aeruginosa* PA14 (UniProt: Q02SL1), *P. aeruginosa* PAO1 (UniProt: Q9KGU7), *K. pneumoniae* strain 342 (UniProt: B5Y0X1), and *E. coli* K12 (UniProt: P77488) were retrieved from the UniProt24 database (<https://www.uniprot.org>). Binding pocket residues were defined as those within 6 Å of compound 14 in the Δ*pa*DXPS co-crystal structure (PDB: 9QY6) and were identified using PyMOL23 Open Source v3.1.0.4. Extracted binding pocket sequences were aligned using ClustalW25 (<https://www.genome.jp/tools-bin/clustalw>) with the SLOW/ACCURATE pairwise alignment setting and default parameters for all other options. Full sequence alignments are provided in the Supporting Information. Pairwise sequence identities and similarity scores were calculated using the Ident and Sim server (https://www.bioinformatics.org/sms2/ident_sim.html).


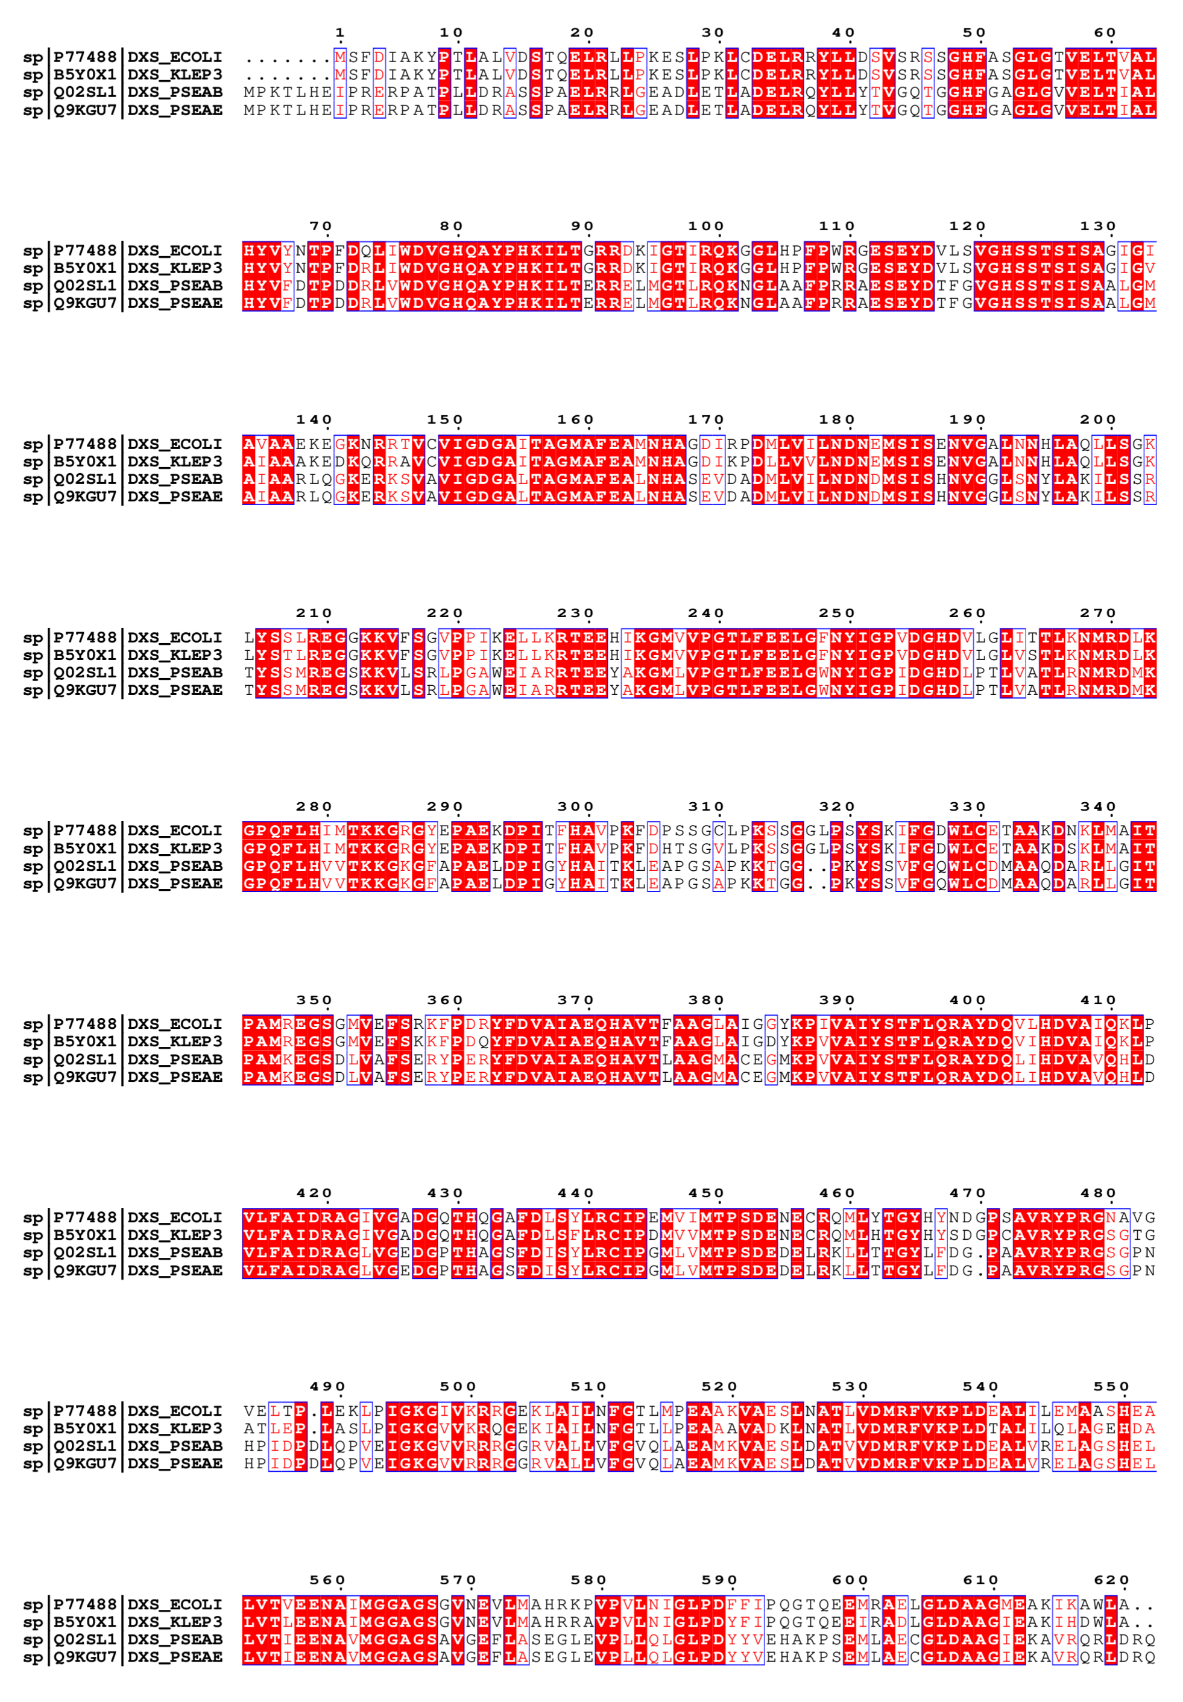


**Figure S3.** Multiple sequence alignment of full-length DXPS protein sequences from *Escherichia coli* K12 (UniProt: P77488), *Klebsiella pneumoniae* 342 (UniProt: B5Y0X1), *Pseudomonas aeruginosa* PA14 (UniProt: Q02SL1), and *P. aeruginosa* PAO1 (UniProt: Q9KGU7). Sequences were aligned using ClustalW25 (<https://www.genome.jp/tools-bin/clustalw>) with the SLOW/ACCURATE pairwise alignment setting and default parameters. Strictly conserved residues are highlighted in red boxes with white lettering; residues with similar physicochemical properties are shown in red lettering. Alignment was rendered using ESPript 3.0 (<https://espript.ibcp.fr>). Residue numbering corresponds to the *E. coli* DXPS sequence.

References

(1) Berman, H. M.; Westbrook, J.; Feng, Z.; Gilliland, G.; Bhat, T. N.; Weissig, H.; Shindyalov, I. N.; Bourne, P. E. The Protein Data Bank. *Nucleic Acids Res.* **2000**, *28* (1), 235–242. https://doi.org/10.1093/nar/28.1.235.

(2) Chemical Computing Group ULC. MOE V2020, 2020. https://www.chemcomp.com/en/index.htm (accessed 2021-01-03).

(3) BioSolveIT GmbH. SeeSAR Version 10.3, 2021. www.biosolveit.de/SeeSAR.

(4) Wójcikowski, M.; Ballester, P. J.; Siedlecki, P. Performance of Machine-Learning Scoring Functions in Structure-Based Virtual Screening. *Sci. Rep.* **2017**, *7* (1), 1–10. https://doi.org/10.1038/srep46710.

(5) Optibrium. Stardrop, 2021. https://optibrium.com/stardrop/ (accessed 2024-01-03).

(6) Berthold, M. R.; Cebron, N.; Dill, F.; Gabriel, T. R.; Kötter, T.; Meinl, T.; Ohl, P.; Sieb, C.; Thiel, K.; Wiswedel, B. KNIME: The Konstanz Information Miner. In *Data Analysis, Machine Learning and Applications*; Preisach, C., Burkhardt, H., Schmidt-Thieme, L., Decker, R., Eds.; Studies in Classification, Data Analysis, and Knowledge Organization; Springer: Berlin, Heidelberg, 2008; pp 319–326. https://doi.org/10.1007/978-3-540-78246-9_38.

(7) Xiang, S.; Usunow, G.; Lange, G.; Busch, M.; Tong, L. Crystal Structure of 1-Deoxy-d-Xylulose 5-Phosphate Synthase, a Crucial Enzyme for Isoprenoids Biosynthesis*. *J. Biol. Chem.* **2007**, *282* (4), 2676–2682. https://doi.org/10.1074/jbc.M610235200.

(8) Hamid, R.; Adam, S.; Lacour, A.; Monjas, L.; Köhnke, J.; Hirsch, A. K. H. 1-Deoxy-D-Xylulose-5-Phosphate Synthase from *Pseudomonas Aeruginosa* and *Klebsiella Pneumoniae* Reveals Conformational Changes upon Cofactor Binding. *J. Biol. Chem.* **2023**, *299* (9), 105152. https://doi.org/10.1016/j.jbc.2023.105152.

(9) Gierse, R. M.; Oerlemans, R.; Reddem, E. R.; Gawriljuk, V. O.; Alhayek, A.; Baitinger, D.; Jakobi, H.; Laber, B.; Lange, G.; Hirsch, A. K. H.; Groves, M. R. First Crystal Structures of 1-Deoxy-D-Xylulose 5-Phosphate Synthase (DXPS) from Mycobacterium Tuberculosis Indicate a Distinct Mechanism of Intermediate Stabilization. *Sci. Rep.* **2022**, *12* (1), 7221. https://doi.org/10.1038/s41598-022-11205-9.

(10) Henriquez, S.; Nosal, C. R.; Knoff, J. R.; Coco, L. B.; Freel Meyers, C. L. Bisubstrate Analog Inhibitors of DXP Synthase Show Species Specificity. *Biochemistry* **2025**, *64* (2), 432–447. https://doi.org/10.1021/acs.biochem.4c00549.

(11) Toci, E. M.; Austin, S. L.; Majumdar, A.; Woodcock, H. L.; Freel Meyers, C. L. Disruption of an Active Site Network Leads to Activation of C2α-Lactylthiamin Diphosphate on the Antibacterial Target 1-Deoxy-d-Xylulose-5-Phosphate Synthase. *Biochemistry* **2024**, *63* (5), 671–687. https://doi.org/10.1021/acs.biochem.3c00735.

(12) Takahashi, S.; Kuzuyama, T.; Watanabe, H.; Seto, H. A 1-Deoxy-d-Xylulose 5-Phosphate Reductoisomerase Catalyzing the Formation of 2-C-Methyl-d-Erythritol 4-Phosphate in an Alternative Nonmevalonate Pathway for Terpenoid Biosynthesis. *Proc. Natl. Acad. Sci.* **1998**, *95* (17), 9879–9884. https://doi.org/10.1073/pnas.95.17.9879.

(13) Bartee, D.; Freel Meyers, C. L. Targeting the Unique Mechanism of Bacterial 1-Deoxy- d -Xylulose-5-Phosphate Synthase. *Biochemistry* **2018**, *57* (29), 4349–4356. https://doi.org/10.1021/acs.biochem.8b00548.

(14) Liang, Y.-F.; Liu, H.; Li, H.; Gao, W.-Y. Determination of the Activity of 1-Deoxy-D-Xylulose 5-Phosphate Synthase by Pre-Column Derivatization-HPLC Using 1,2-Diamino-4,5-Methylenedioxybenzene as a Derivatizing Reagent. *Protein J.* **2019**, *38* (2), 160–166. https://doi.org/10.1007/s10930-019-09816-9.

(15) OriginLab Corporation. Origin(Pro) 2020b, 2023.

(16) Evans, P. R.; Murshudov, G. N. How Good Are My Data and What Is the Resolution? *Acta Crystallogr. D Biol. Crystallogr.* **2013**, *69* (7), 1204–1214. https://doi.org/10.1107/S0907444913000061.

(17) Winn, M. D.; Ballard, C. C.; Cowtan, K. D.; Dodson, E. J.; Emsley, P.; Evans, P. R.; Keegan, R. M.; Krissinel, E. B.; Leslie, A. G. W.; McCoy, A.; McNicholas, S. J.; Murshudov, G. N.; Pannu, N. S.; Potterton, E. A.; Powell, H. R.; Read, R. J.; Vagin, A.; Wilson, K. S. Overview of the CCP4 Suite and Current Developments. *Acta Crystallogr. D Biol. Crystallogr.* **2011**, *67* (4), 235–242. https://doi.org/10.1107/S0907444910045749.

(18) Adams, P. D.; Afonine, P. V.; Bunkóczi, G.; Chen, V. B.; Davis, I. W.; Echols, N.; Headd, J. J.; Hung, L.-W.; Kapral, G. J.; Grosse-Kunstleve, R. W.; McCoy, A. J.; Moriarty, N. W.; Oeffner, R.; Read, R. J.; Richardson, D. C.; Richardson, J. S.; Terwilliger, T. C.; Zwart, P. H. PHENIX: A Comprehensive Python-Based System for Macromolecular Structure Solution. *Acta Crystallogr. D Biol. Crystallogr.* **2010**, *66* (2), 213–221. https://doi.org/10.1107/S0907444909052925.

(19) McCoy, A. J.; Grosse-Kunstleve, R. W.; Adams, P. D.; Winn, M. D.; Storoni, L. C.; Read, R. J. Phaser Crystallographic Software. *J. Appl. Crystallogr.* **2007**, *40* (4), 658–674. https://doi.org/10.1107/S0021889807021206.

(20) Emsley, P.; Lohkamp, B.; Scott, W. G.; Cowtan, K. Features and Development of Coot. *Acta Crystallogr. D Biol. Crystallogr.* **2010**, *66* (4), 486–501. https://doi.org/10.1107/S0907444910007493.

(21) Afonine, P. V.; Grosse-Kunstleve, R. W.; Echols, N.; Headd, J. J.; Moriarty, N. W.; Mustyakimov, M.; Terwilliger, T. C.; Urzhumtsev, A.; Zwart, P. H.; Adams, P. D. Towards Automated Crystallographic Structure Refinement with Phenix.Refine. *Acta Crystallogr. D Biol. Crystallogr.* **2012**, *68* (4), 352–367. https://doi.org/10.1107/S0907444912001308.

(22) Williams, C. J.; Headd, J. J.; Moriarty, N. W.; Prisant, M. G.; Videau, L. L.; Deis, L. N.; Verma, V.; Keedy, D. A.; Hintze, B. J.; Chen, V. B.; Jain, S.; Lewis, S. M.; Arendall, W. B.; Snoeyink, J.; Adams, P. D.; Lovell, S. C.; Richardson, J. S.; Richardson, D. C. MolProbity: More and Better Reference Data for Improved All-Atom Structure Validation. *Protein Sci. Publ. Protein Soc.* **2018**, *27* (1), 293–315. https://doi.org/10.1002/pro.3330.

(23) The PyMOL Molecular Graphics System, 2015.

(24) Bateman, A.; Martin, M.-J.; Orchard, S.; Magrane, M.; Ahmad, S.; Alpi, E.; Bowler-Barnett, E. H.; Britto, R.; Bye-A-Jee, H.; Cukura, A.; Denny, P.; Dogan, T.; Ebenezer, T.; Fan, J.; Garmiri, P.; da Costa Gonzales, L. J.; Hatton-Ellis, E.; Hussein, A.; Ignatchenko, A.; Insana, G.; Ishtiaq, R.; Joshi, V.; Jyothi, D.; Kandasaamy, S.; Lock, A.; Luciani, A.; Lugaric, M.; Luo, J.; Lussi, Y.; MacDougall, A.; Madeira, F.; Mahmoudy, M.; Mishra, A.; Moulang, K.; Nightingale, A.; Pundir, S.; Qi, G.; Raj, S.; Raposo, P.; Rice, D. L.; Saidi, R.; Santos, R.; Speretta, E.; Stephenson, J.; Totoo, P.; Turner, E.; Tyagi, N.; Vasudev, P.; Warner, K.; Watkins, X.; Zaru, R.; Zellner, H.; Bridge, A. J.; Aimo, L.; Argoud-Puy, G.; Auchincloss, A. H.; Axelsen, K. B.; Bansal, P.; Baratin, D.; Batista Neto, T. M.; Blatter, M.-C.; Bolleman, J. T.; Boutet, E.; Breuza, L.; Gil, B. C.; Casals-Casas, C.; Echioukh, K. C.; Coudert, E.; Cuche, B.; de Castro, E.; Estreicher, A.; Famiglietti, M. L.; Feuermann, M.; Gasteiger, E.; Gaudet, P.; Gehant, S.; Gerritsen, V.; Gos, A.; Gruaz, N.; Hulo, C.; Hyka-Nouspikel, N.; Jungo, F.; Kerhornou, A.; Le Mercier, P.; Lieberherr, D.; Masson, P.; Morgat, A.; Muthukrishnan, V.; Paesano, S.; Pedruzzi, I.; Pilbout, S.; Pourcel, L.; Poux, S.; Pozzato, M.; Pruess, M.; Redaschi, N.; Rivoire, C.; Sigrist, C. J. A.; Sonesson, K.; Sundaram, S.; Wu, C. H.; Arighi, C. N.; Arminski, L.; Chen, C.; Chen, Y.; Huang, H.; Laiho, K.; McGarvey, P.; Natale, D. A.; Ross, K.; Vinayaka, C. R.; Wang, Q.; Wang, Y.; Zhang, J. UniProt: The Universal Protein Knowledgebase in 2023. *Nucleic Acids Res.* **2023**, *51* (D1), D523–D531. https://doi.org/10.1093/nar/gkac1052.

(25) Thompson, J. D.; Higgins, D. G.; Gibson, T. J. CLUSTAL W: Improving the Sensitivity of Progressive Multiple Sequence Alignment through Sequence Weighting, Position-Specific Gap Penalties and Weight Matrix Choice. *Nucleic Acids Res.* **1994**, *22* (22), 4673–4680. https://doi.org/10.1093/nar/22.22.4673.

Author Contributions

A.M.L.L. performed the chemical synthesis and virtual screening portion of the investigation, and the writing of the original manuscript draft. L.J.K. and N.D.S. contributed to the investigation by performing the kinetic and inhibition experiments and assisted in writing the original draft. R.W. performed the crystallography. P.R. and D.W.H. provided guidance on the analysis of and the interpretation of the crystallography data. C.F.M. provided lead supervision for L.J.K. and N.D.S. E.D., A.K.H.H., and M.M.H. contributed to the project's conceptualization, overall project administration, and the supervision of A.M.L.L. A.K.H.H. led the study. All authors contributed to the review of the final manuscript.
