# Supplementary material for: X-ray Co-crystal Structure of a Novel Pseudomonas aeruginosa DXPS Inhibitor Reveals an Unusual Allosteric Binding Pocket
Source: Research Square preprint supplement (doi:10.21203/rs.3.rs-8434964/v1), 2026-04-10
Supplement: Supplementary file 3 [file c753c5f99293ba89967e66aa.pdf]

## Chromatogram and Results

| Injection Details    |                                  |                         |
|----------------------|----------------------------------|-------------------------|
| Injection Name:      | HIPS6017                         | Run Time (min): 5.10    |
| Vial Number:         | GB5                              | Injection Volume: 4.00  |
| Injection Type:      | Unknown                          | Channel: UV_VIS_1       |
| Calibration Level:   |                                  | Wavelength: 254         |
| Instrument Method:   | 0.6ml_+ve_-ve_100-600            | Bandwidth: 2            |
| Processing Method:   | Processing Method - 0.5 min area | Dilution Factor: 1.0000 |
| Injection Date/Time: | 12/Aug/23 10:04                  | Sample Weight: 1.0000   |

### Chromatogram

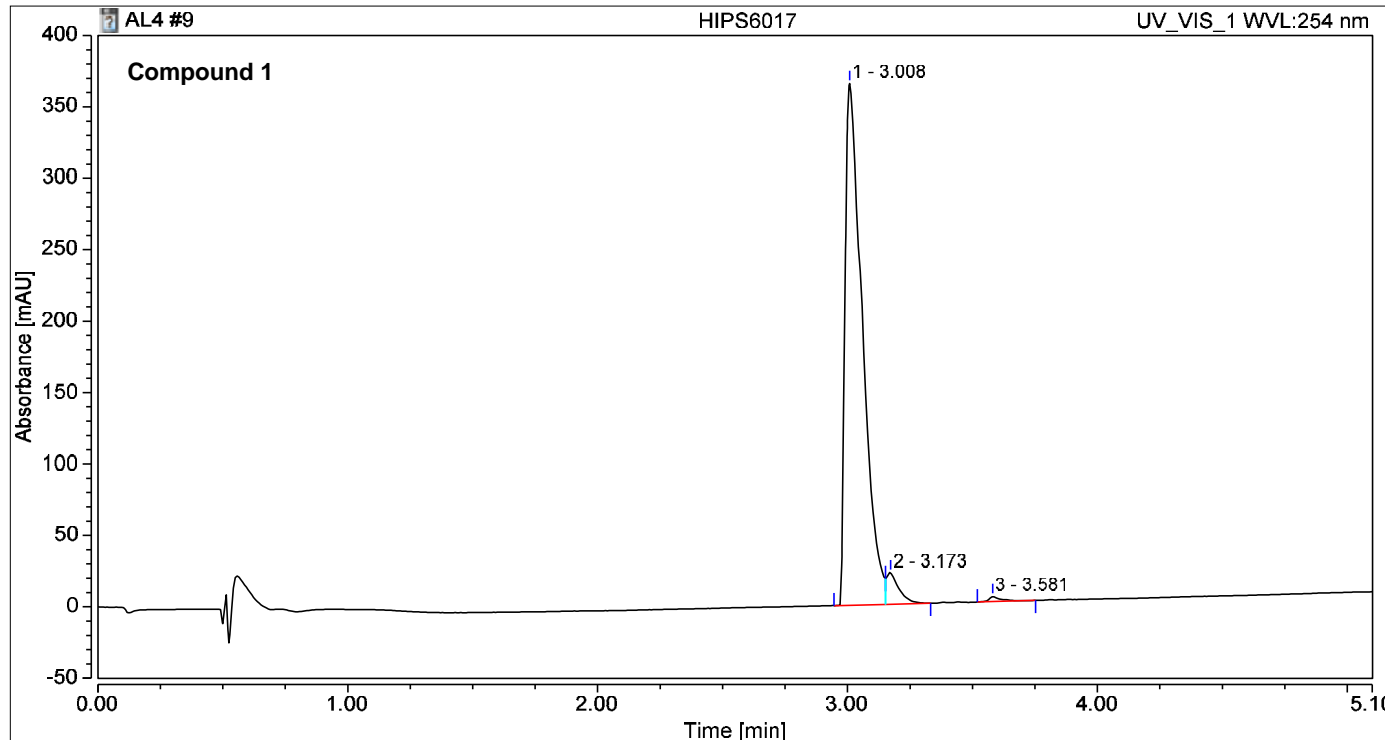

| Integration Results |           |                       |                 |                |                    |                      |                |
|---------------------|-----------|-----------------------|-----------------|----------------|--------------------|----------------------|----------------|
| No.                 | Peak Name | Retention Time<br>min | Area<br>mAU*min | Height<br>mAU  | Relative Area<br>% | Relative Height<br>% | Amount<br>n.a. |
| 1                   |           | 3.008                 | 29.291          | 365.263        | 95.16              | 93.48                | n.a.           |
| 2                   |           | 3.173                 | 1.294           | 21.973         | 4.21               | 5.62                 | n.a.           |
| 3                   |           | 3.581                 | 0.197           | 3.484          | 0.64               | 0.89                 | n.a.           |
| <b>Total:</b>       |           |                       | <b>30.782</b>   | <b>390.721</b> | <b>100.00</b>      | <b>100.00</b>        |                |

## Chromatogram and Results

| Injection Details    |                                  |                         |
|----------------------|----------------------------------|-------------------------|
| Injection Name:      | HIPS6725                         | Run Time (min): 5.10    |
| Vial Number:         | GB8                              | Injection Volume: 4.00  |
| Injection Type:      | Unknown                          | Channel: UV_VIS_1       |
| Calibration Level:   |                                  | Wavelength: 254         |
| Instrument Method:   | 0.6ml_+ve_-ve_100-600            | Bandwidth: 2            |
| Processing Method:   | Processing Method - 0.5 min area | Dilution Factor: 1.0000 |
| Injection Date/Time: | 12/Aug/23 10:27                  | Sample Weight: 1.0000   |

### Chromatogram

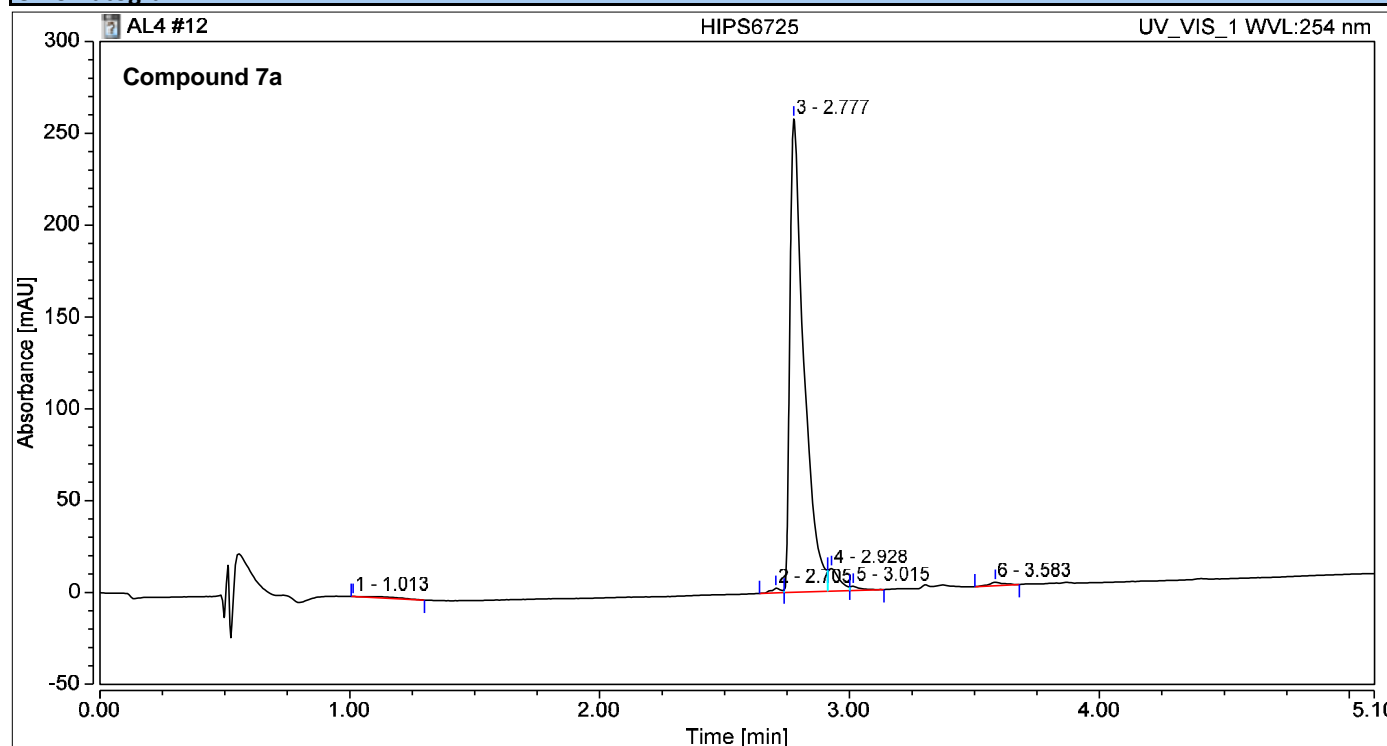

| Integration Results |           |                       |                 |               |                    |                      |                |
|---------------------|-----------|-----------------------|-----------------|---------------|--------------------|----------------------|----------------|
| No.                 | Peak Name | Retention Time<br>min | Area<br>mAU*min | Height<br>mAU | Relative Area<br>% | Relative Height<br>% | Amount<br>n.a. |
| 1                   |           | 1.013                 | 0.104           | 0.073         | 0.59               | 0.03                 | n.a.           |
| 2                   |           | 2.705                 | 0.108           | 2.525         | 0.60               | 0.91                 | n.a.           |
| 3                   |           | 2.777                 | 16.915          | 263.233       | 95.03              | 95.08                | n.a.           |
| 4                   |           | 2.928                 | 0.433           | 6.783         | 2.43               | 2.45                 | n.a.           |
| 5                   |           | 3.015                 | 0.114           | 2.352         | 0.64               | 0.85                 | n.a.           |
| 6                   |           | 3.583                 | 0.126           | 1.885         | 0.71               | 0.68                 | n.a.           |
| Total:              |           |                       | 17.800          | 276.854       | 100.00             | 100.00               |                |

## Chromatogram and Results

| Injection Details    |                                  |                         |
|----------------------|----------------------------------|-------------------------|
| Injection Name:      | HIPS6616                         | Run Time (min): 5.10    |
| Vial Number:         | GA2                              | Injection Volume: 4.00  |
| Injection Type:      | Unknown                          | Channel: UV_VIS_1       |
| Calibration Level:   |                                  | Wavelength: 254         |
| Instrument Method:   | 0.6ml_+ve_-ve_100-600            | Bandwidth: 2            |
| Processing Method:   | Processing Method - 0.5 min area | Dilution Factor: 1.0000 |
| Injection Date/Time: | 12/Aug/23 09:14                  | Sample Weight: 1.0000   |

### Chromatogram

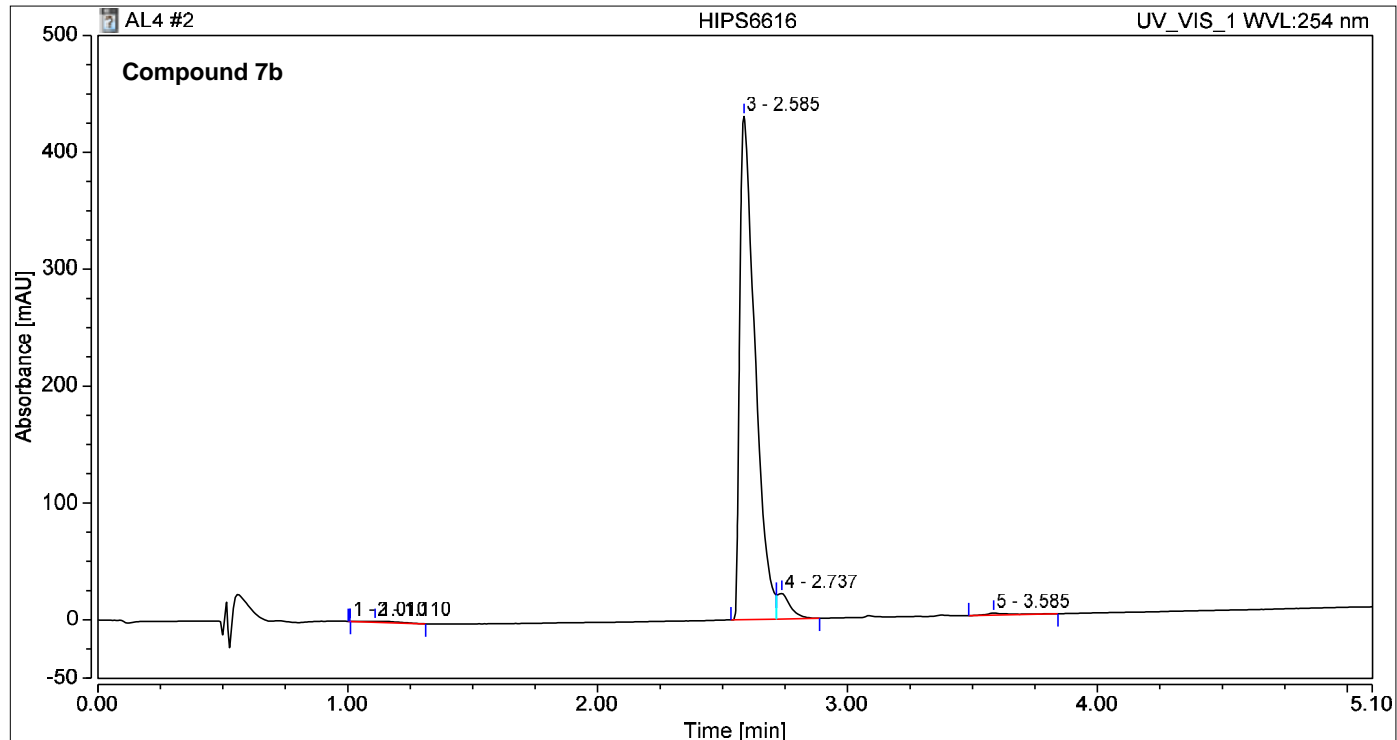

| Integration Results |           |                       |                 |               |                    |                      |                |
|---------------------|-----------|-----------------------|-----------------|---------------|--------------------|----------------------|----------------|
| No.                 | Peak Name | Retention Time<br>min | Area<br>mAU*min | Height<br>mAU | Relative Area<br>% | Relative Height<br>% | Amount<br>n.a. |
| 1                   |           | 1.010                 | 0.000           | 0.010         | 0.00               | 0.00                 | n.a.           |
| 2                   |           | 1.110                 | 0.147           | 0.844         | 0.46               | 0.19                 | n.a.           |
| 3                   |           | 2.585                 | 30.491          | 430.686       | 95.8               | 94.60                | n.a.           |
| 4                   |           | 2.737                 | 1.345           | 21.872        | 4.18               | 4.80                 | n.a.           |
| 5                   |           | 3.585                 | 0.180           | 1.862         | 0.56               | 0.41                 | n.a.           |
| Total:              |           |                       | 32.164          | 455.274       | 100.00             | 100.00               |                |

## Chromatogram and Results

### Injection Details

|                      |                                  |                   |          |
|----------------------|----------------------------------|-------------------|----------|
| Injection Name:      | HIPS6895                         | Run Time (min):   | 5.10     |
| Vial Number:         | GC5                              | Injection Volume: | 4.00     |
| Injection Type:      | Unknown                          | Channel:          | UV_VIS_1 |
| Calibration Level:   |                                  | Wavelength:       | 254      |
| Instrument Method:   | 0.6ml_+ve_-ve_100-600            | Bandwidth:        | 2        |
| Processing Method:   | Processing Method - 0.5 min area | Dilution Factor:  | 1.0000   |
| Injection Date/Time: | 12/Aug/23 10:34                  | Sample Weight:    | 1.0000   |

### Chromatogram

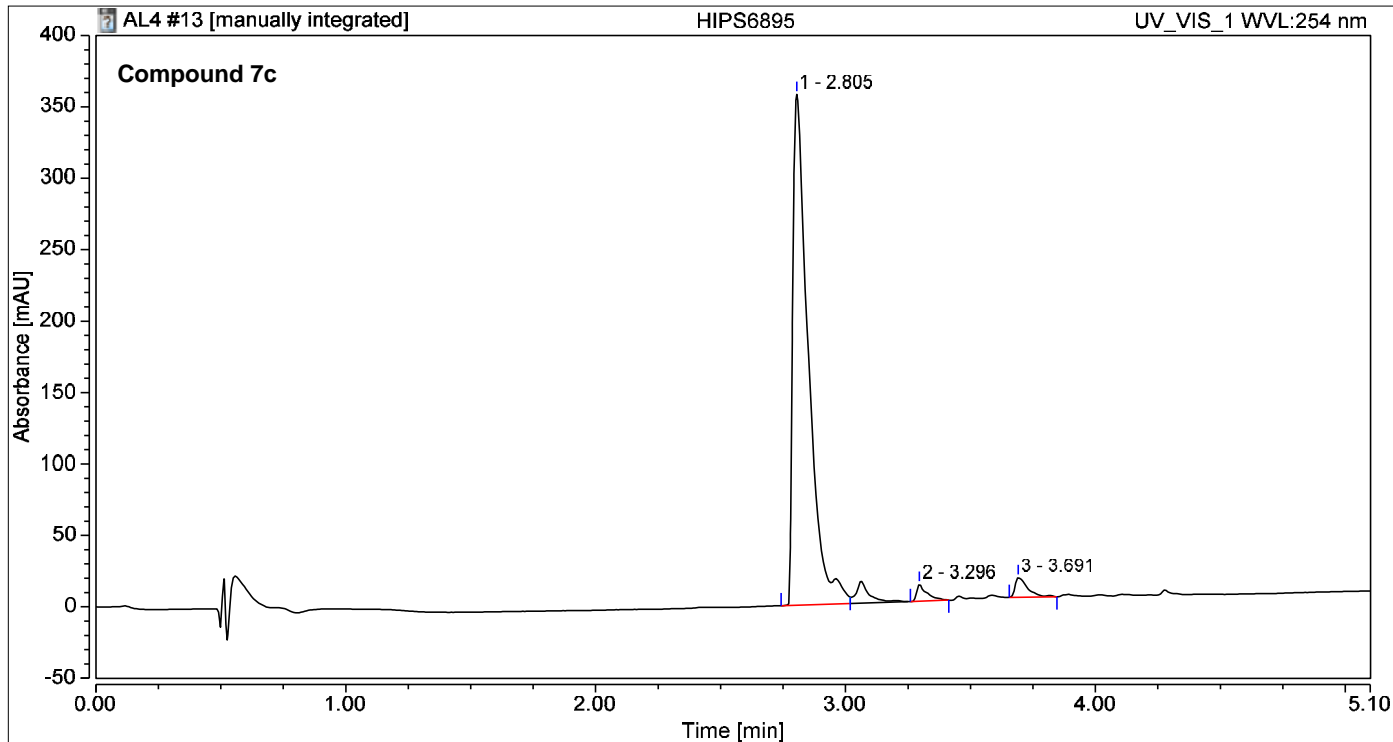

### Integration Results

| No.    | Peak Name | Retention Time<br>min | Area<br>mAU*min | Height<br>mAU | Relative Area<br>% | Relative Height<br>% | Amount<br>n.a. |
|--------|-----------|-----------------------|-----------------|---------------|--------------------|----------------------|----------------|
| 1      |           | 2.805                 | 25.884          | 357.705       | 94.98              | 93.31                | n.a.           |
| 2      |           | 3.296                 | 0.563           | 11.875        | 2.07               | 3.10                 | n.a.           |
| 3      |           | 3.691                 | 0.805           | 13.767        | 2.95               | 3.59                 | n.a.           |
| Total: |           |                       | 27.252          | 383.346       | 100.00             | 100.00               |                |

## Chromatogram and Results

| Injection Details    |                                  |                         |
|----------------------|----------------------------------|-------------------------|
| Injection Name:      | HIPS7018                         | Run Time (min): 5.10    |
| Vial Number:         | GA1                              | Injection Volume: 4.00  |
| Injection Type:      | Unknown                          | Channel: UV_VIS_1       |
| Calibration Level:   |                                  | Wavelength: 254         |
| Instrument Method:   | 0.6ml_+ve_-ve_100-600            | Bandwidth: 2            |
| Processing Method:   | Processing Method - 0.5 min area | Dilution Factor: 1.0000 |
| Injection Date/Time: | 12/Aug/23 09:07                  | Sample Weight: 1.0000   |

### Chromatogram

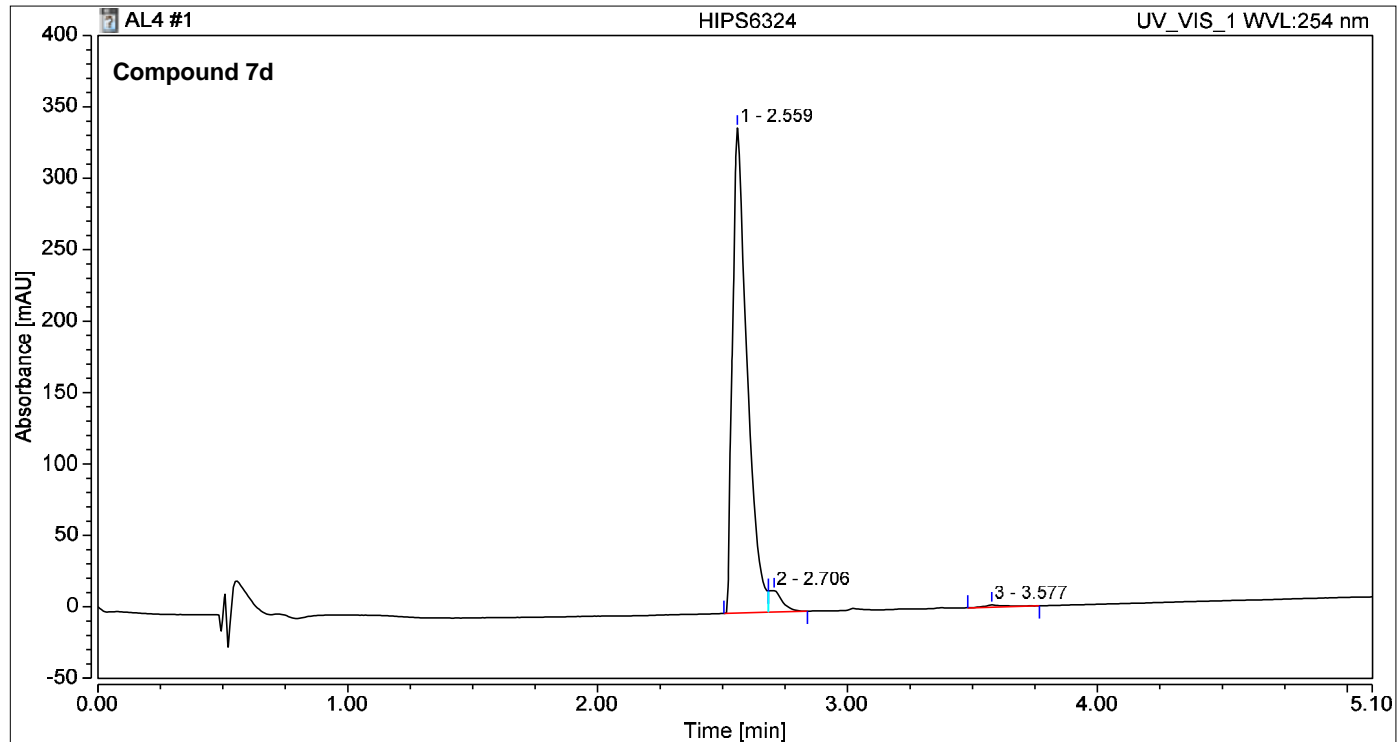

| Integration Results |           |                       |                 |               |                    |                      |                |
|---------------------|-----------|-----------------------|-----------------|---------------|--------------------|----------------------|----------------|
| No.                 | Peak Name | Retention Time<br>min | Area<br>mAU*min | Height<br>mAU | Relative Area<br>% | Relative Height<br>% | Amount<br>n.a. |
| 1                   |           | 2.559                 | 23.003          | 339.768       | 95.50              | 95.31                | n.a.           |
| 2                   |           | 2.706                 | 0.935           | 15.074        | 3.88               | 4.23                 | n.a.           |
| 3                   |           | 3.577                 | 0.148           | 1.661         | 0.61               | 0.47                 | n.a.           |
| Total:              |           |                       | 24.086          | 356.503       | 100.00             | 100.00               |                |

## Chromatogram and Results

| Injection Details    |                                  |                         |
|----------------------|----------------------------------|-------------------------|
| Injection Name:      | HIPS8092                         | Run Time (min): 5.10    |
| Vial Number:         | GA3                              | Injection Volume: 4.00  |
| Injection Type:      | Unknown                          | Channel: UV_VIS_1       |
| Calibration Level:   |                                  | Wavelength: 254         |
| Instrument Method:   | 0.6ml_+ve_-ve_100-600            | Bandwidth: 2            |
| Processing Method:   | Processing Method - 0.5 min area | Dilution Factor: 1.0000 |
| Injection Date/Time: | 12/Aug/23 09:21                  | Sample Weight: 1.0000   |

### Chromatogram

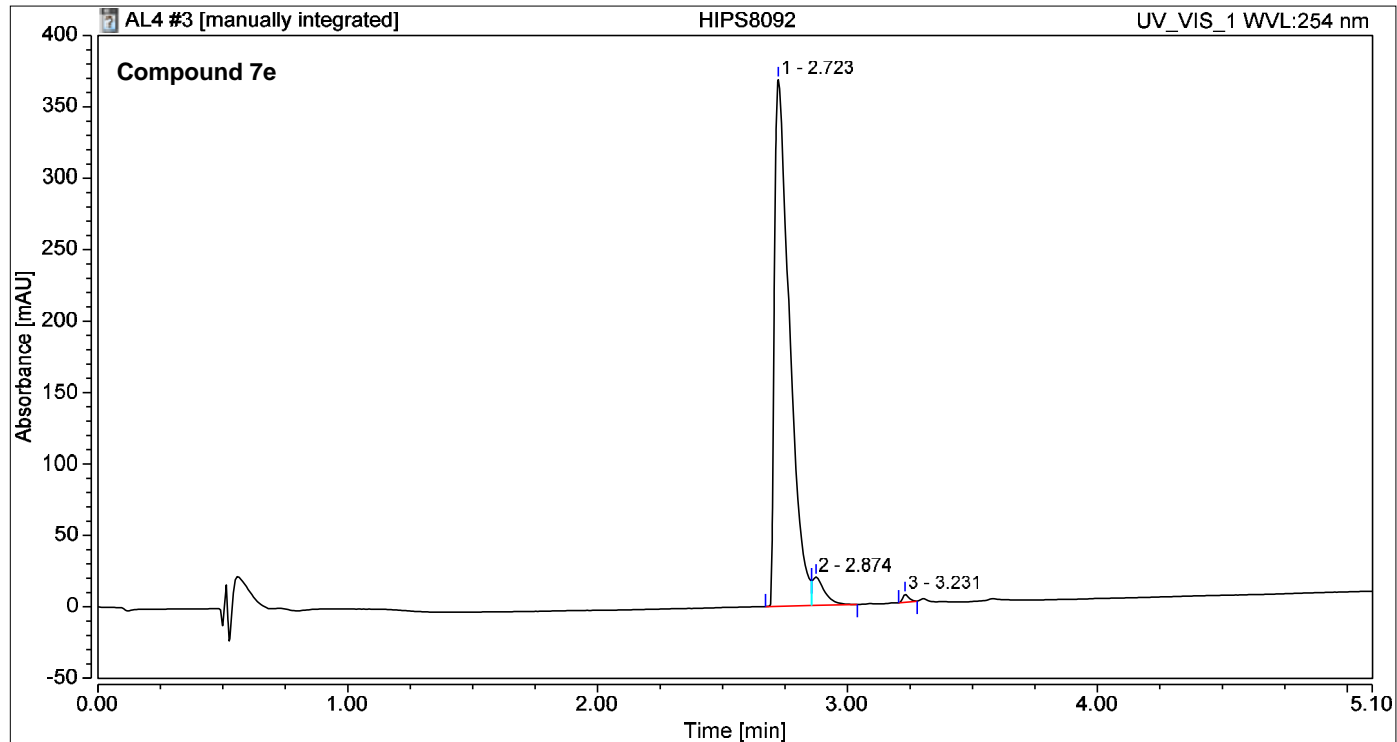

| Integration Results |           |                       |                 |               |                    |                      |                |
|---------------------|-----------|-----------------------|-----------------|---------------|--------------------|----------------------|----------------|
| No.                 | Peak Name | Retention Time<br>min | Area<br>mAU*min | Height<br>mAU | Relative Area<br>% | Relative Height<br>% | Amount<br>n.a. |
| 1                   |           | 2.723                 | 25.904          | 368.766       | 95.25              | 93.60                | n.a.           |
| 2                   |           | 2.874                 | 1.134           | 19.841        | 4.17               | 5.04                 | n.a.           |
| 3                   |           | 3.231                 | 0.158           | 5.394         | 0.58               | 1.37                 | n.a.           |
| Total:              |           |                       | 27.196          | 394.000       | 100.00             | 100.00               |                |

## Chromatogram and Results

| Injection Details    |                                  |                         |
|----------------------|----------------------------------|-------------------------|
| Injection Name:      | HIPS8093                         | Run Time (min): 5.10    |
| Vial Number:         | GA4                              | Injection Volume: 4.00  |
| Injection Type:      | Unknown                          | Channel: UV_VIS_1       |
| Calibration Level:   |                                  | Wavelength: 254         |
| Instrument Method:   | 0.6ml_+ve_-ve_100-600            | Bandwidth: 2            |
| Processing Method:   | Processing Method - 0.5 min area | Dilution Factor: 1.0000 |
| Injection Date/Time: | 12/Aug/23 09:28                  | Sample Weight: 1.0000   |

### Chromatogram

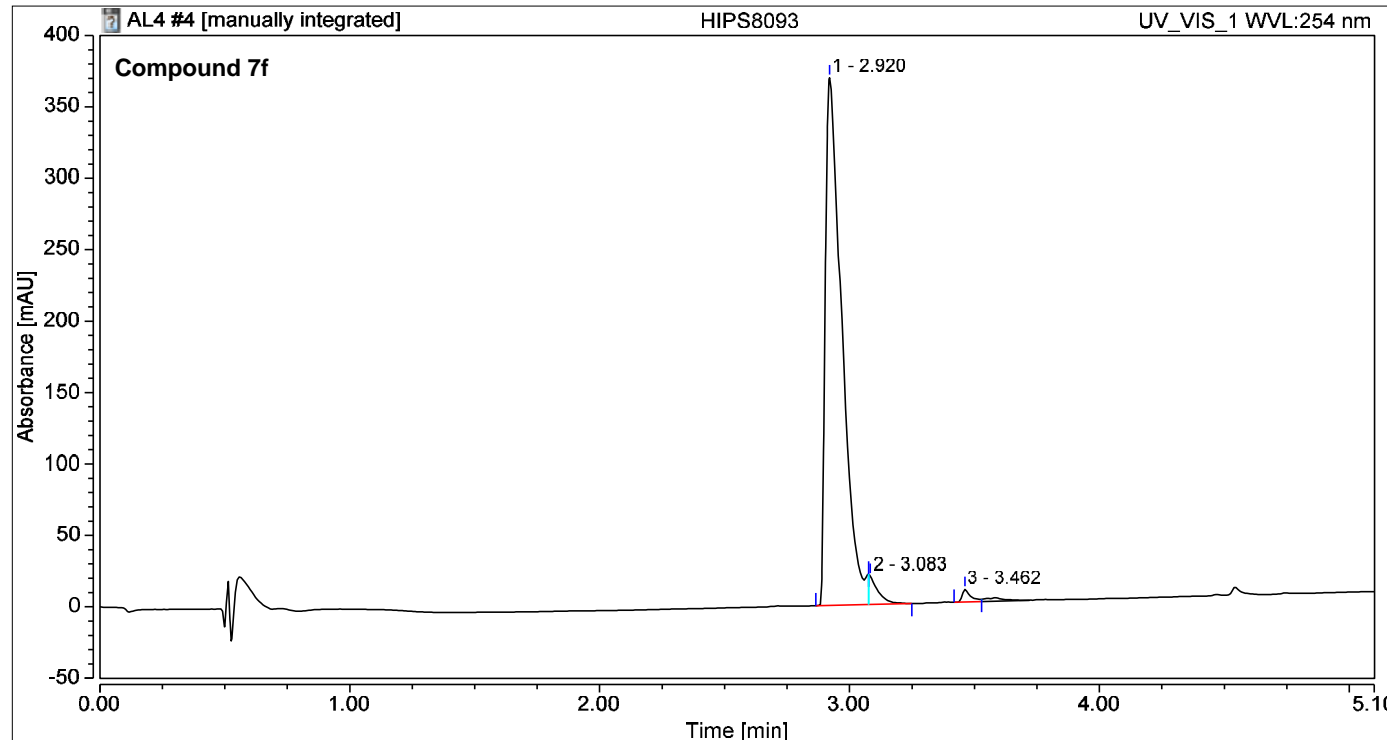

| Integration Results |           |                       |                 |               |                    |                      |                |
|---------------------|-----------|-----------------------|-----------------|---------------|--------------------|----------------------|----------------|
| No.                 | Peak Name | Retention Time<br>min | Area<br>mAU*min | Height<br>mAU | Relative Area<br>% | Relative Height<br>% | Amount<br>n.a. |
| 1                   |           | 2.920                 | 28.396          | 369.496       | 95.85              | 92.82                | n.a.           |
| 2                   |           | 3.083                 | 0.879           | 19.757        | 2.97               | 4.96                 | n.a.           |
| 3                   |           | 3.462                 | 0.351           | 8.813         | 1.19               | 2.21                 | n.a.           |
| Total:              |           |                       | 29.626          | 398.067       | 100.00             | 100.00               |                |

## Chromatogram and Results

| Injection Details    |                                  |                         |
|----------------------|----------------------------------|-------------------------|
| Injection Name:      | HIPS8094                         | Run Time (min): 5.10    |
| Vial Number:         | GA5                              | Injection Volume: 4.00  |
| Injection Type:      | Unknown                          | Channel: UV_VIS_1       |
| Calibration Level:   |                                  | Wavelength: 254         |
| Instrument Method:   | 0.6ml_+ve_-ve_100-600            | Bandwidth: 2            |
| Processing Method:   | Processing Method - 0.5 min area | Dilution Factor: 1.0000 |
| Injection Date/Time: | 12/Aug/23 09:35                  | Sample Weight: 1.0000   |

### Chromatogram

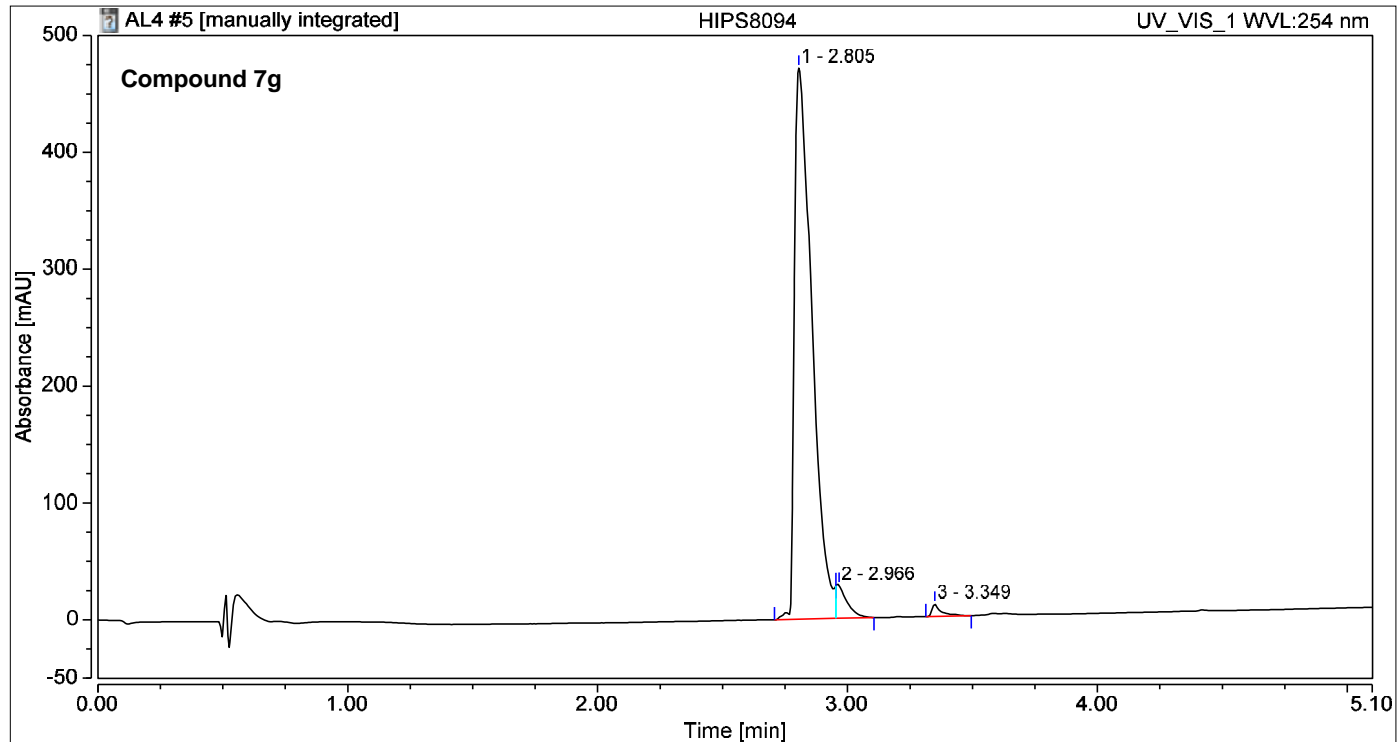

| Integration Results |           |                       |                 |               |                    |                      |                |
|---------------------|-----------|-----------------------|-----------------|---------------|--------------------|----------------------|----------------|
| No.                 | Peak Name | Retention Time<br>min | Area<br>mAU*min | Height<br>mAU | Relative Area<br>% | Relative Height<br>% | Amount<br>n.a. |
| 1                   |           | 2.805                 | 38.395          | 471.661       | 95.24              | 92.40                | n.a.           |
| 2                   |           | 2.966                 | 1.440           | 28.208        | 3.57               | 5.53                 | n.a.           |
| 3                   |           | 3.349                 | 0.481           | 10.573        | 1.19               | 2.07                 | n.a.           |
| Total:              |           |                       | 40.316          | 510.441       | 100.00             | 100.00               |                |

## Chromatogram and Results

| Injection Details    |                                  |                         |
|----------------------|----------------------------------|-------------------------|
| Injection Name:      | HIPS8095                         | Run Time (min): 5.10    |
| Vial Number:         | GA6                              | Injection Volume: 4.00  |
| Injection Type:      | Unknown                          | Channel: UV_VIS_1       |
| Calibration Level:   |                                  | Wavelength: 254         |
| Instrument Method:   | 0.6ml_+ve_-ve_100-600            | Bandwidth: 2            |
| Processing Method:   | Processing Method - 0.5 min area | Dilution Factor: 1.0000 |
| Injection Date/Time: | 12/Aug/23 09:43                  | Sample Weight: 1.0000   |

### Chromatogram

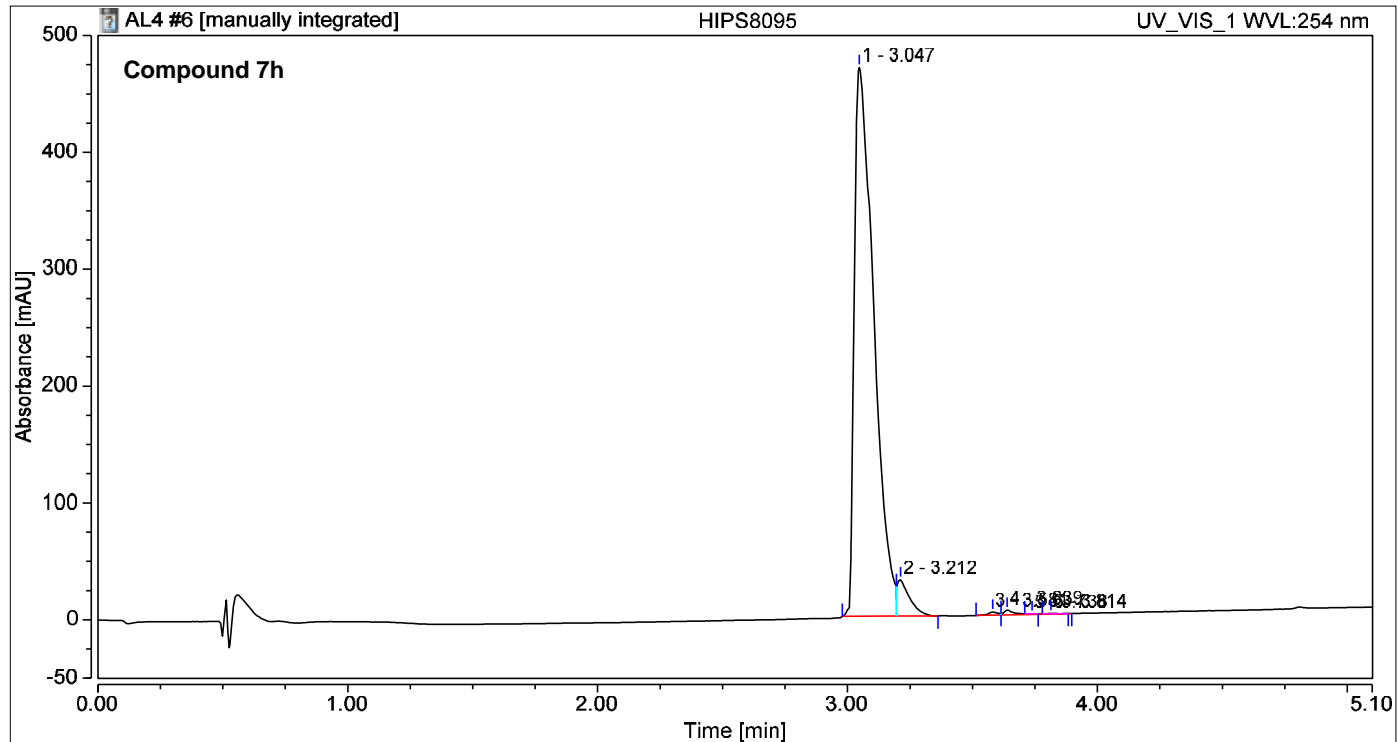

| Integration Results |           |                       |                 |               |                    |                      |                |
|---------------------|-----------|-----------------------|-----------------|---------------|--------------------|----------------------|----------------|
| No.                 | Peak Name | Retention Time<br>min | Area<br>mAU*min | Height<br>mAU | Relative Area<br>% | Relative Height<br>% | Amount<br>n.a. |
| 1                   |           | 3.047                 | 42.283          | 469.575       | 95.11              | 92.48                | n.a.           |
| 2                   |           | 3.212                 | 1.809           | 31.116        | 4.07               | 6.13                 | n.a.           |
| 3                   |           | 3.581                 | 0.117           | 2.509         | 0.26               | 0.49                 | n.a.           |
| 4                   |           | 3.639                 | 0.227           | 3.955         | 0.51               | 0.78                 | n.a.           |
| 5                   |           | 3.738                 | 0.005           | 0.205         | 0.01               | 0.04                 | n.a.           |
| 6                   |           | 3.814                 | 0.015           | 0.402         | 0.03               | 0.08                 | n.a.           |
| Total:              |           |                       | 44.455          | 507.761       | 100.00             | 100.00               |                |

## Chromatogram and Results

| Injection Details    |                                  |                         |
|----------------------|----------------------------------|-------------------------|
| Injection Name:      | HIPS8096                         | Run Time (min): 5.10    |
| Vial Number:         | GA7                              | Injection Volume: 4.00  |
| Injection Type:      | Unknown                          | Channel: UV_VIS_1       |
| Calibration Level:   |                                  | Wavelength: 254         |
| Instrument Method:   | 0.6ml_+ve_-ve_100-600            | Bandwidth: 2            |
| Processing Method:   | Processing Method - 0.5 min area | Dilution Factor: 1.0000 |
| Injection Date/Time: | 12/Aug/23 09:50                  | Sample Weight: 1.0000   |

### Chromatogram

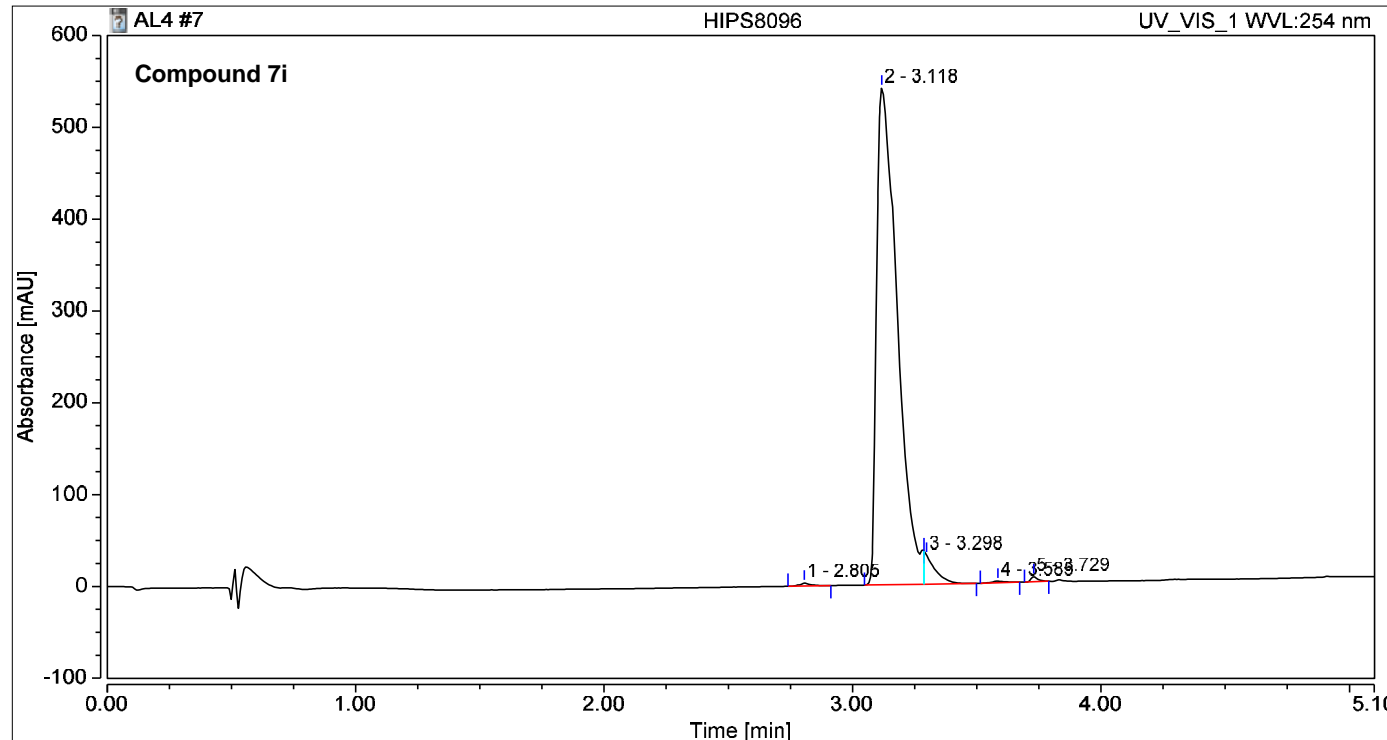

| Integration Results |           |                       |                 |                |                    |                      |                |
|---------------------|-----------|-----------------------|-----------------|----------------|--------------------|----------------------|----------------|
| No.                 | Peak Name | Retention Time<br>min | Area<br>mAU*min | Height<br>mAU  | Relative Area<br>% | Relative Height<br>% | Amount<br>n.a. |
| 1                   |           | 2.805                 | 0.159           | 3.238          | 0.29               | 0.56                 | n.a.           |
| 2                   |           | 3.118                 | 52.037          | 541.040        | 96.00              | 92.77                | n.a.           |
| 3                   |           | 3.298                 | 1.712           | 31.579         | 3.16               | 5.41                 | n.a.           |
| 4                   |           | 3.585                 | 0.110           | 1.798          | 0.20               | 0.31                 | n.a.           |
| 5                   |           | 3.729                 | 0.187           | 5.576          | 0.34               | 0.96                 | n.a.           |
| <b>Total:</b>       |           |                       | <b>54.205</b>   | <b>583.230</b> | <b>100.00</b>      | <b>100.00</b>        |                |

## Chromatogram and Results

| Injection Details    |                                  |                         |
|----------------------|----------------------------------|-------------------------|
| Injection Name:      | HIPS7055                         | Run Time (min): 5.10    |
| Vial Number:         | GA4                              | Injection Volume: 4.00  |
| Injection Type:      | Unknown                          | Channel: UV_VIS_1       |
| Calibration Level:   |                                  | Wavelength: 254         |
| Instrument Method:   | 0.6ml_+ve_-ve_100-600            | Bandwidth: 2            |
| Processing Method:   | Processing Method - 0.5 min area | Dilution Factor: 1.0000 |
| Injection Date/Time: | 12/Aug/23 12:38                  | Sample Weight: 1.0000   |

### Chromatogram

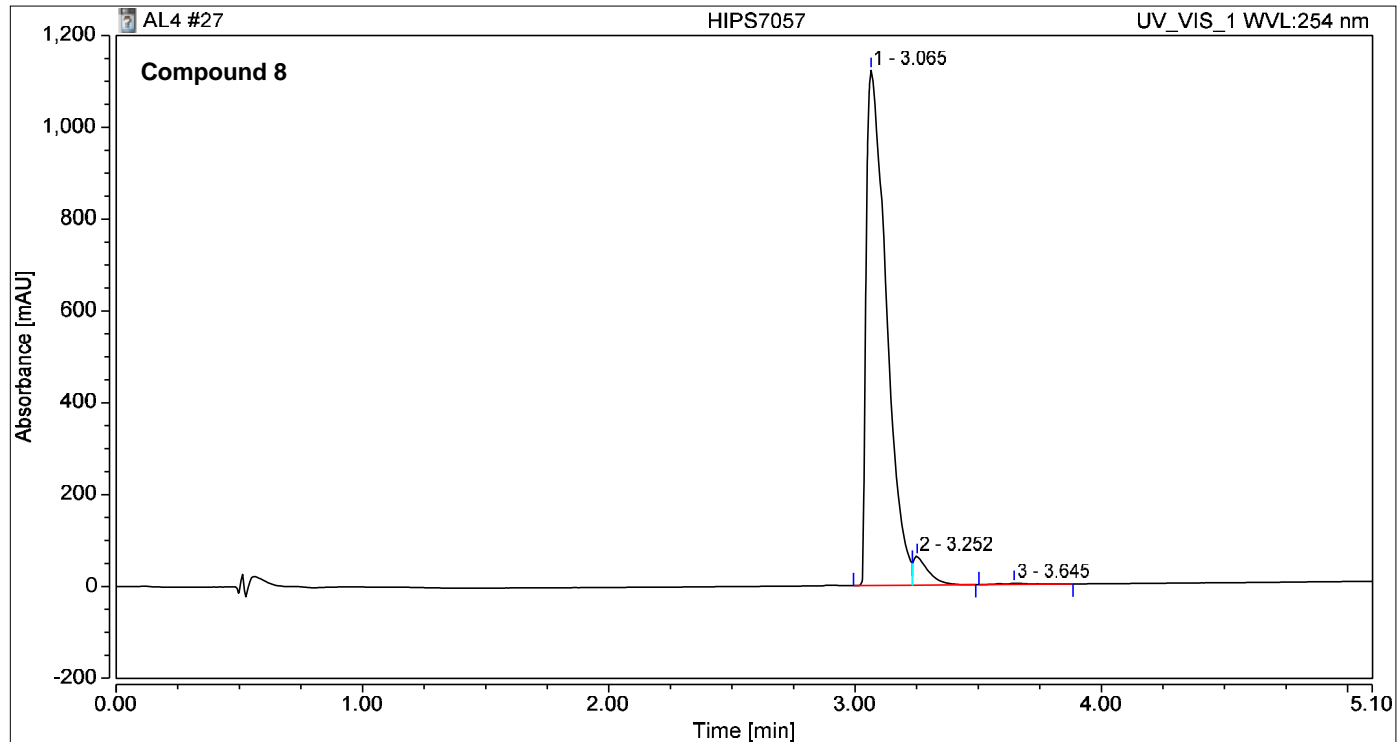

| Integration Results |           |                       |                 |               |                    |                      |                |
|---------------------|-----------|-----------------------|-----------------|---------------|--------------------|----------------------|----------------|
| No.                 | Peak Name | Retention Time<br>min | Area<br>mAU*min | Height<br>mAU | Relative Area<br>% | Relative Height<br>% | Amount<br>n.a. |
| 1                   |           | 3.065                 | 105.711         | 1121.938      | 95.71              | 94.50                | n.a.           |
| 2                   |           | 3.252                 | 4.416           | 62.633        | 4.00               | 5.28                 | n.a.           |
| 3                   |           | 3.645                 | 0.321           | 2.617         | 0.29               | 0.22                 | n.a.           |
| Total:              |           |                       | 110.448         | 1187.189      | 100.00             | 100.00               |                |

## Chromatogram and Results

| Injection Details    |                                  |                         |
|----------------------|----------------------------------|-------------------------|
| Injection Name:      | HIPS7459                         | Run Time (min): 5.10    |
| Vial Number:         | GB4                              | Injection Volume: 4.00  |
| Injection Type:      | Unknown                          | Channel: UV_VIS_1       |
| Calibration Level:   |                                  | Wavelength: 254         |
| Instrument Method:   | 0.6ml_+ve_-ve_100-600            | Bandwidth: 2            |
| Processing Method:   | Processing Method - 0.5 min area | Dilution Factor: 1.0000 |
| Injection Date/Time: | 12/Aug/23 15:39                  | Sample Weight: 1.0000   |

### Chromatogram

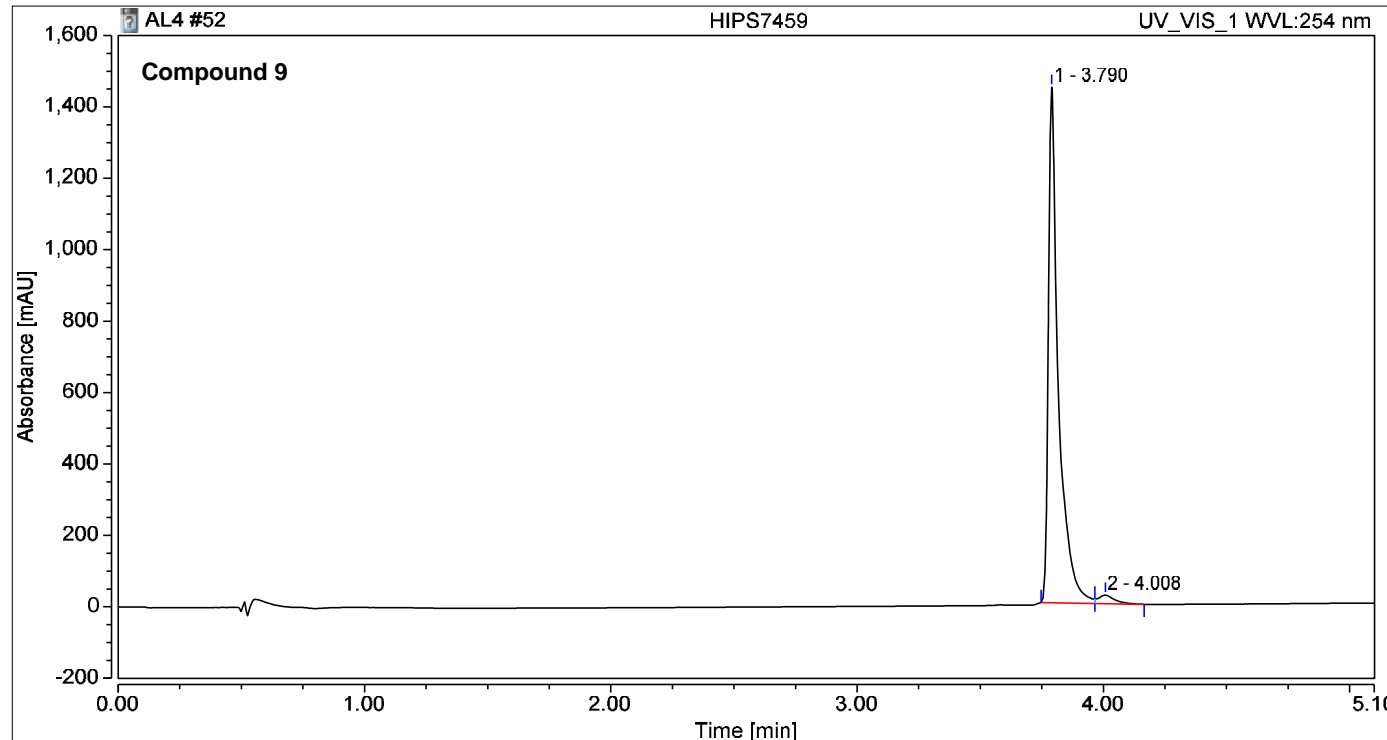

| Integration Results |           |                       |                 |                 |                    |                      |                |
|---------------------|-----------|-----------------------|-----------------|-----------------|--------------------|----------------------|----------------|
| No.                 | Peak Name | Retention Time<br>min | Area<br>mAU*min | Height<br>mAU   | Relative Area<br>% | Relative Height<br>% | Amount<br>n.a. |
| 1                   |           | 3.790                 | 68.242          | 1443.070        | 97.40              | 98.38                | n.a.           |
| 2                   |           | 4.008                 | 1.819           | 23.726          | 2.60               | 1.62                 | n.a.           |
| <b>Total:</b>       |           |                       | <b>70.061</b>   | <b>1466.797</b> | <b>100.00</b>      | <b>100.00</b>        |                |

## Chromatogram and Results

| Injection Details    |                                  |                         |
|----------------------|----------------------------------|-------------------------|
| Injection Name:      | HIPS7062                         | Run Time (min): 5.10    |
| Vial Number:         | GC6                              | Injection Volume: 4.00  |
| Injection Type:      | Unknown                          | Channel: UV_VIS_1       |
| Calibration Level:   |                                  | Wavelength: 254         |
| Instrument Method:   | 0.6ml_+ve_-ve_100-600            | Bandwidth: 2            |
| Processing Method:   | Processing Method - 0.5 min area | Dilution Factor: 1.0000 |
| Injection Date/Time: | 12/Aug/23 10:41                  | Sample Weight: 1.0000   |

### Chromatogram

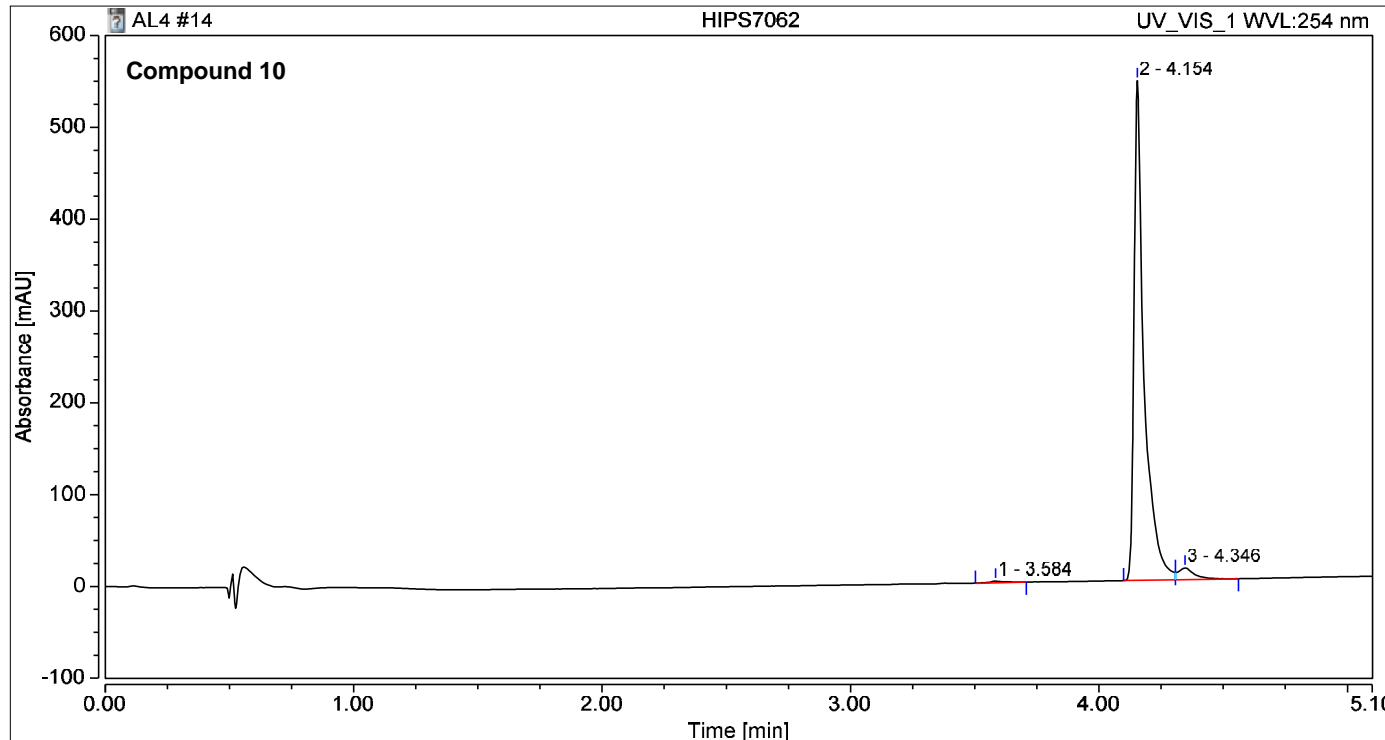

| Integration Results |           |                       |                 |               |                    |                      |                |
|---------------------|-----------|-----------------------|-----------------|---------------|--------------------|----------------------|----------------|
| No.                 | Peak Name | Retention Time<br>min | Area<br>mAU*min | Height<br>mAU | Relative Area<br>% | Relative Height<br>% | Amount<br>n.a. |
| 1                   |           | 3.584                 | 0.130           | 1.721         | 0.49               | 0.31                 | n.a.           |
| 2                   |           | 4.154                 | 25.330          | 544.140       | 95.85              | 97.41                | n.a.           |
| 3                   |           | 4.346                 | 0.967           | 12.738        | 3.66               | 2.28                 | n.a.           |
| Total:              |           |                       | 26.427          | 558.599       | 100.00             | 100.00               |                |

## Chromatogram and Results

| Injection Details    |                                  |                         |
|----------------------|----------------------------------|-------------------------|
| Injection Name:      | HIPS7066                         | Run Time (min): 5.10    |
| Vial Number:         | GC8                              | Injection Volume: 4.00  |
| Injection Type:      | Unknown                          | Channel: UV_VIS_1       |
| Calibration Level:   |                                  | Wavelength: 254         |
| Instrument Method:   | 0.6ml_+ve_-ve_100-600            | Bandwidth: 2            |
| Processing Method:   | Processing Method - 0.5 min area | Dilution Factor: 1.0000 |
| Injection Date/Time: | 12/Aug/23 10:55                  | Sample Weight: 1.0000   |

### Chromatogram

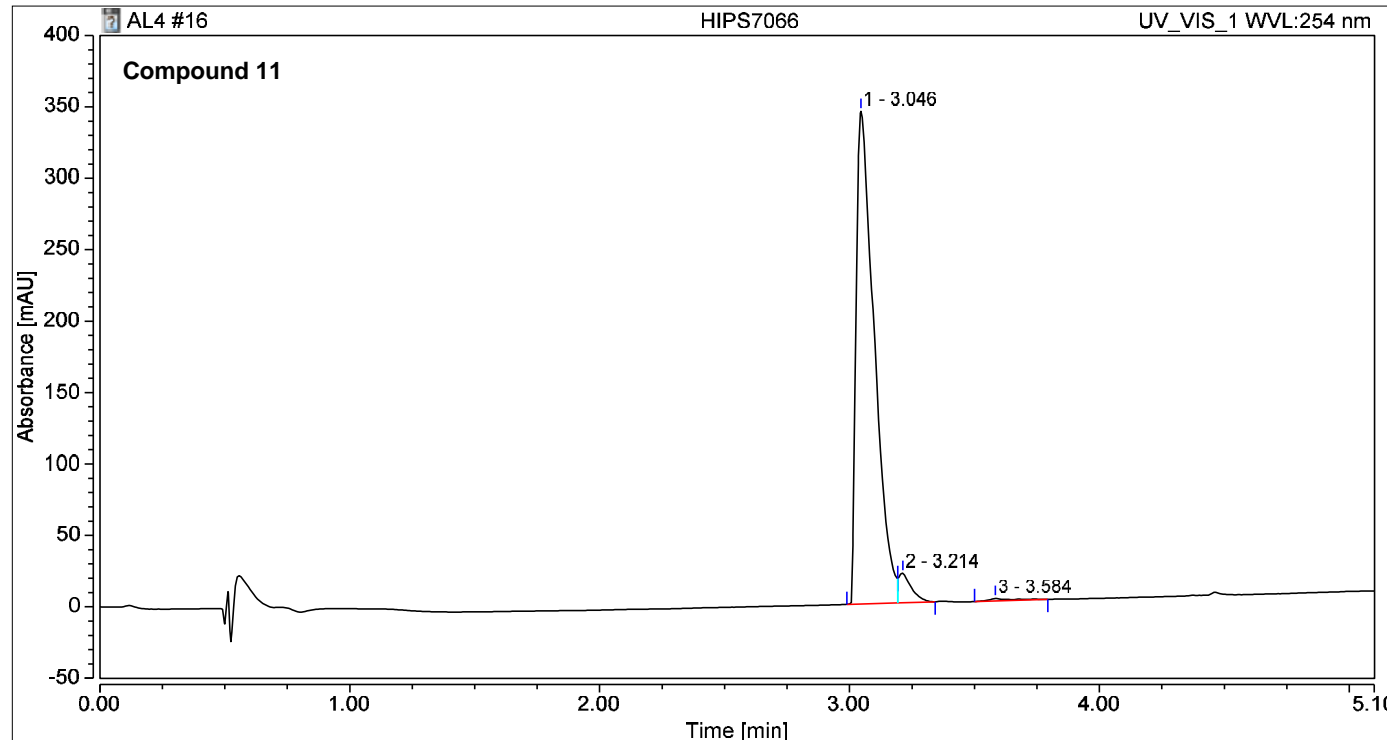

| Integration Results |           |                       |                 |               |                    |                      |                |
|---------------------|-----------|-----------------------|-----------------|---------------|--------------------|----------------------|----------------|
| No.                 | Peak Name | Retention Time<br>min | Area<br>mAU*min | Height<br>mAU | Relative Area<br>% | Relative Height<br>% | Amount<br>n.a. |
| 1                   |           | 3.046                 | 28.987          | 344.942       | 95.31              | 93.92                | n.a.           |
| 2                   |           | 3.214                 | 1.228           | 20.526        | 4.04               | 5.59                 | n.a.           |
| 3                   |           | 3.584                 | 0.199           | 1.789         | 0.66               | 0.49                 | n.a.           |
| Total:              |           |                       | 30.415          | 367.258       | 100.00             | 100.00               |                |

## Chromatogram and Results

| Injection Details    |                                  |                         |
|----------------------|----------------------------------|-------------------------|
| Injection Name:      | HIPS7169                         | Run Time (min): 5.10    |
| Vial Number:         | GA2                              | Injection Volume: 4.00  |
| Injection Type:      | Unknown                          | Channel: UV_VIS_1       |
| Calibration Level:   |                                  | Wavelength: 254         |
| Instrument Method:   | 0.6ml_+ve_-ve_100-600            | Bandwidth: 2            |
| Processing Method:   | Processing Method - 0.5 min area | Dilution Factor: 1.0000 |
| Injection Date/Time: | 12/Aug/23 11:29                  | Sample Weight: 1.0000   |

### Chromatogram

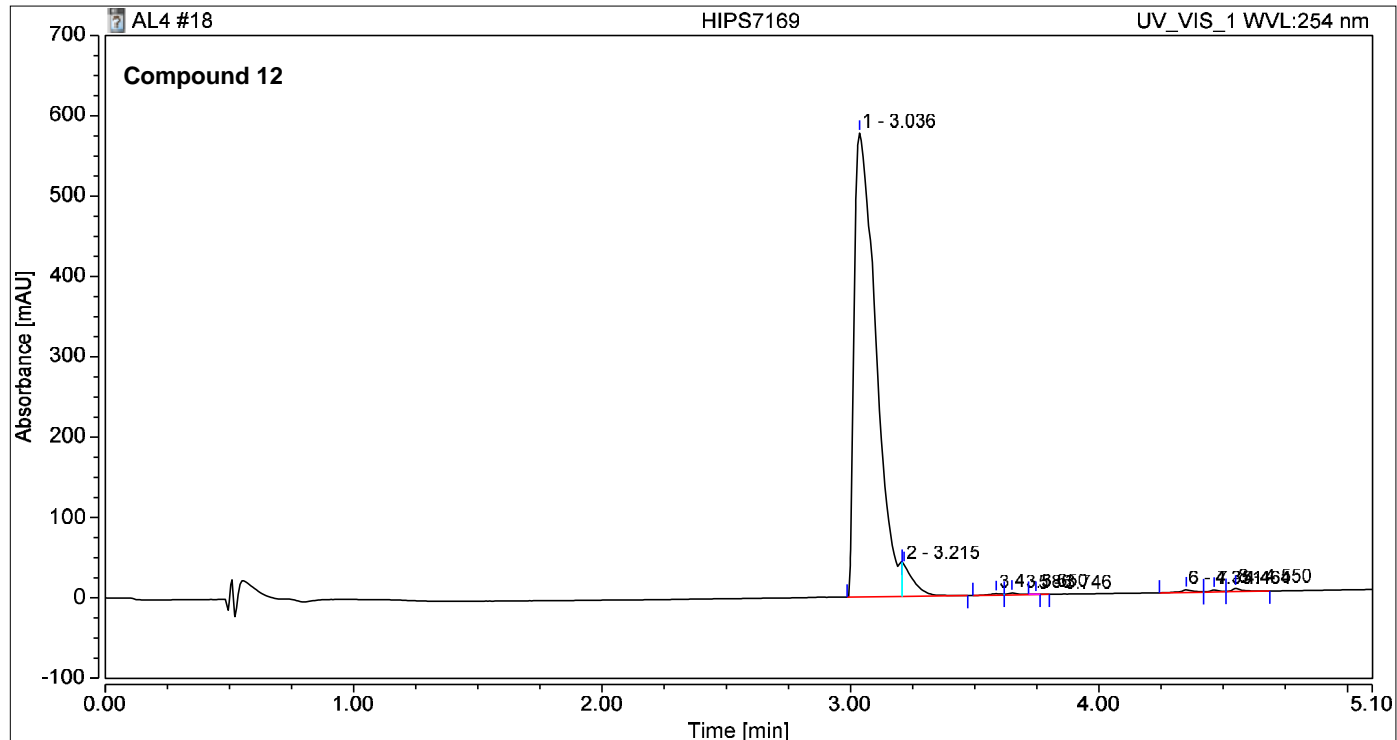

| Integration Results |           |                       |                 |               |                    |                      |                |
|---------------------|-----------|-----------------------|-----------------|---------------|--------------------|----------------------|----------------|
| No.                 | Peak Name | Retention Time<br>min | Area<br>mAU*min | Height<br>mAU | Relative Area<br>% | Relative Height<br>% | Amount<br>n.a. |
| 1                   |           | 3.036                 | 58.209          | 577.336       | 95.31              | 91.45                | n.a.           |
| 2                   |           | 3.215                 | 2.118           | 39.521        | 3.47               | 6.26                 | n.a.           |
| 3                   |           | 3.586                 | 0.106           | 1.865         | 0.17               | 0.30                 | n.a.           |
| 4                   |           | 3.650                 | 0.143           | 2.394         | 0.23               | 0.38                 | n.a.           |
| 5                   |           | 3.746                 | 0.003           | 0.140         | 0.01               | 0.02                 | n.a.           |
| 6                   |           | 4.351                 | 0.189           | 3.322         | 0.31               | 0.53                 | n.a.           |
| 7                   |           | 4.464                 | 0.109           | 2.508         | 0.18               | 0.40                 | n.a.           |
| 8                   |           | 4.550                 | 0.199           | 4.220         | 0.33               | 0.67                 | n.a.           |
| Total:              |           |                       | 61.076          | 631.305       | 100.00             | 100.00               |                |

## Chromatogram and Results

| Injection Details    |                                  |                         |
|----------------------|----------------------------------|-------------------------|
| Injection Name:      | HIPS6074                         | Run Time (min): 5.10    |
| Vial Number:         | GB6                              | Injection Volume: 4.00  |
| Injection Type:      | Unknown                          | Channel: UV_VIS_1       |
| Calibration Level:   |                                  | Wavelength: 254         |
| Instrument Method:   | 0.6ml_+ve_-ve_100-600            | Bandwidth: 2            |
| Processing Method:   | Processing Method - 0.5 min area | Dilution Factor: 1.0000 |
| Injection Date/Time: | 12/Aug/23 10:11                  | Sample Weight: 1.0000   |

### Chromatogram

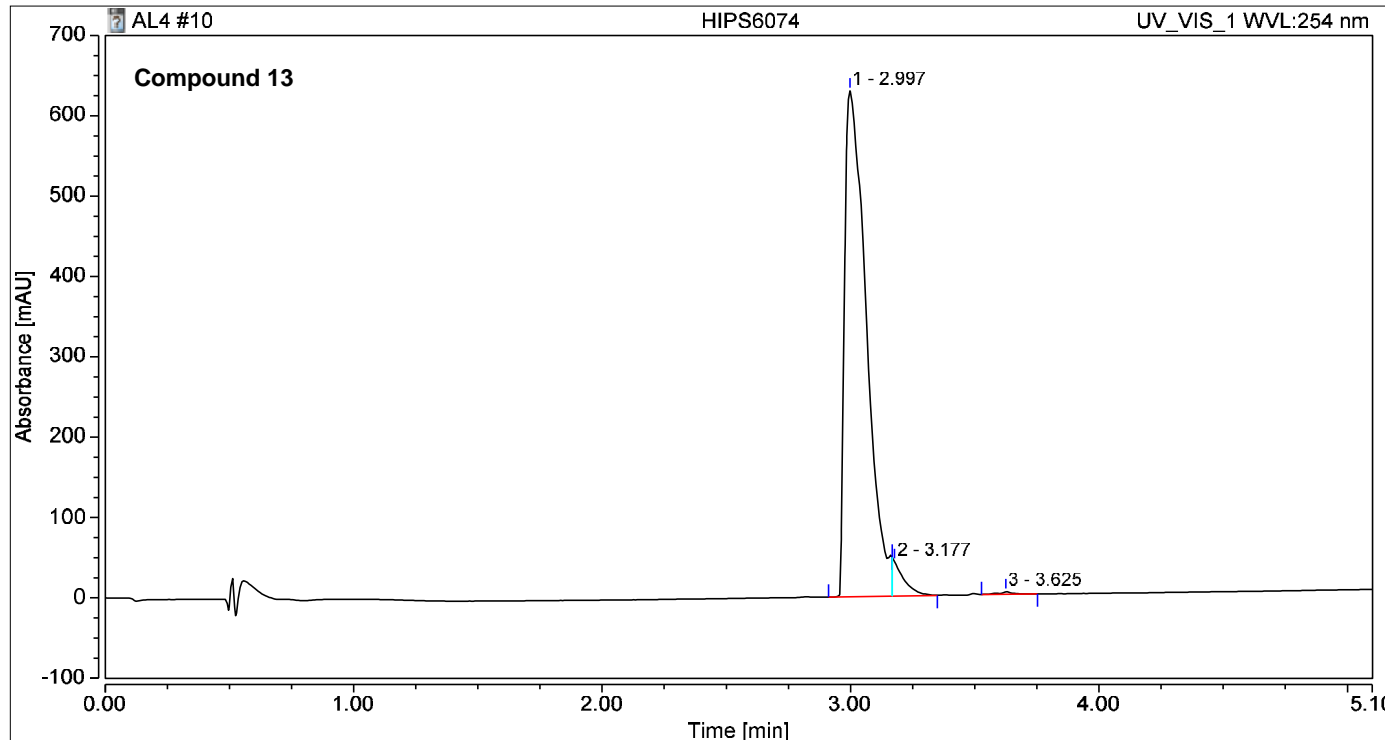

| Integration Results |           |                       |                 |               |                    |                      |                |
|---------------------|-----------|-----------------------|-----------------|---------------|--------------------|----------------------|----------------|
| No.                 | Peak Name | Retention Time<br>min | Area<br>mAU*min | Height<br>mAU | Relative Area<br>% | Relative Height<br>% | Amount<br>n.a. |
| 1                   |           | 2.997                 | 63.255          | 629.655       | 96.08              | 93.17                | n.a.           |
| 2                   |           | 3.177                 | 2.381           | 43.016        | 3.62               | 6.36                 | n.a.           |
| 3                   |           | 3.625                 | 0.199           | 3.173         | 0.30               | 0.47                 | n.a.           |
| Total:              |           |                       | 65.835          | 675.844       | 100.00             | 100.00               |                |

## Chromatogram and Results

| Injection Details    |                                  |                         |
|----------------------|----------------------------------|-------------------------|
| Injection Name:      | HIPS7067                         | Run Time (min): 5.10    |
| Vial Number:         | GA1                              | Injection Volume: 4.00  |
| Injection Type:      | Unknown                          | Channel: UV_VIS_1       |
| Calibration Level:   |                                  | Wavelength: 254         |
| Instrument Method:   | 0.6ml_+ve_-ve_100-600            | Bandwidth: 2            |
| Processing Method:   | Processing Method - 0.5 min area | Dilution Factor: 1.0000 |
| Injection Date/Time: | 12/Aug/23 11:21                  | Sample Weight: 1.0000   |

### Chromatogram

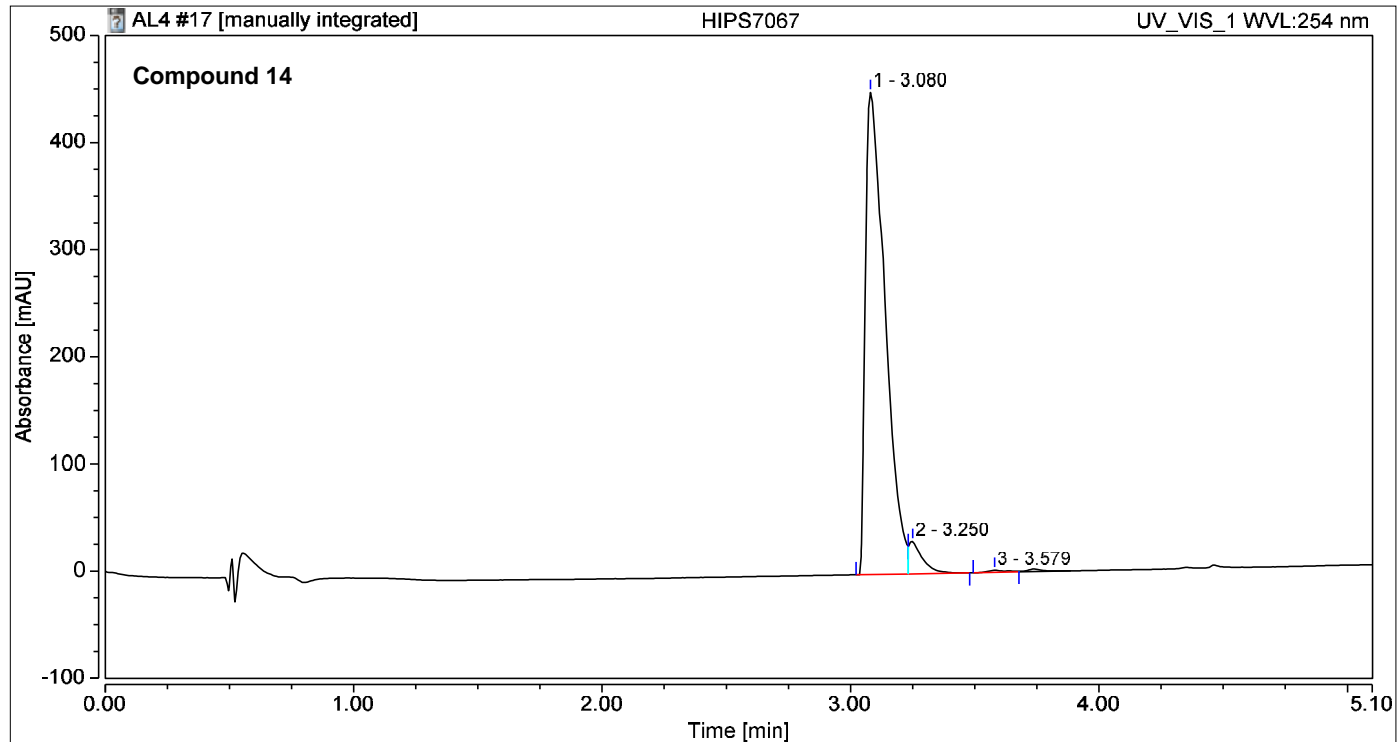

| Integration Results |           |                       |                 |               |                    |                      |                |
|---------------------|-----------|-----------------------|-----------------|---------------|--------------------|----------------------|----------------|
| No.                 | Peak Name | Retention Time<br>min | Area<br>mAU*min | Height<br>mAU | Relative Area<br>% | Relative Height<br>% | Amount<br>n.a. |
| 1                   |           | 3.080                 | 41.517          | 450.151       | 95.19              | 93.33                | n.a.           |
| 2                   |           | 3.250                 | 1.921           | 30.162        | 4.40               | 6.25                 | n.a.           |
| 3                   |           | 3.579                 | 0.176           | 2.003         | 0.40               | 0.42                 | n.a.           |
| Total:              |           |                       | 43.615          | 482.315       | 100.00             | 100.00               |                |

## Chromatogram and Results

### Injection Details

|                      |                                  |                   |          |
|----------------------|----------------------------------|-------------------|----------|
| Injection Name:      | HIPS7456                         | Run Time (min):   | 5.10     |
| Vial Number:         | GA6                              | Injection Volume: | 4.00     |
| Injection Type:      | Unknown                          | Channel:          | UV_VIS_1 |
| Calibration Level:   |                                  | Wavelength:       | 254      |
| Instrument Method:   | 0.6ml_+ve_-ve_100-600            | Bandwidth:        | 2        |
| Processing Method:   | Processing Method - 0.5 min area | Dilution Factor:  | 1.0000   |
| Injection Date/Time: | 12/Aug/23 11:57                  | Sample Weight:    | 1.0000   |

### Chromatogram

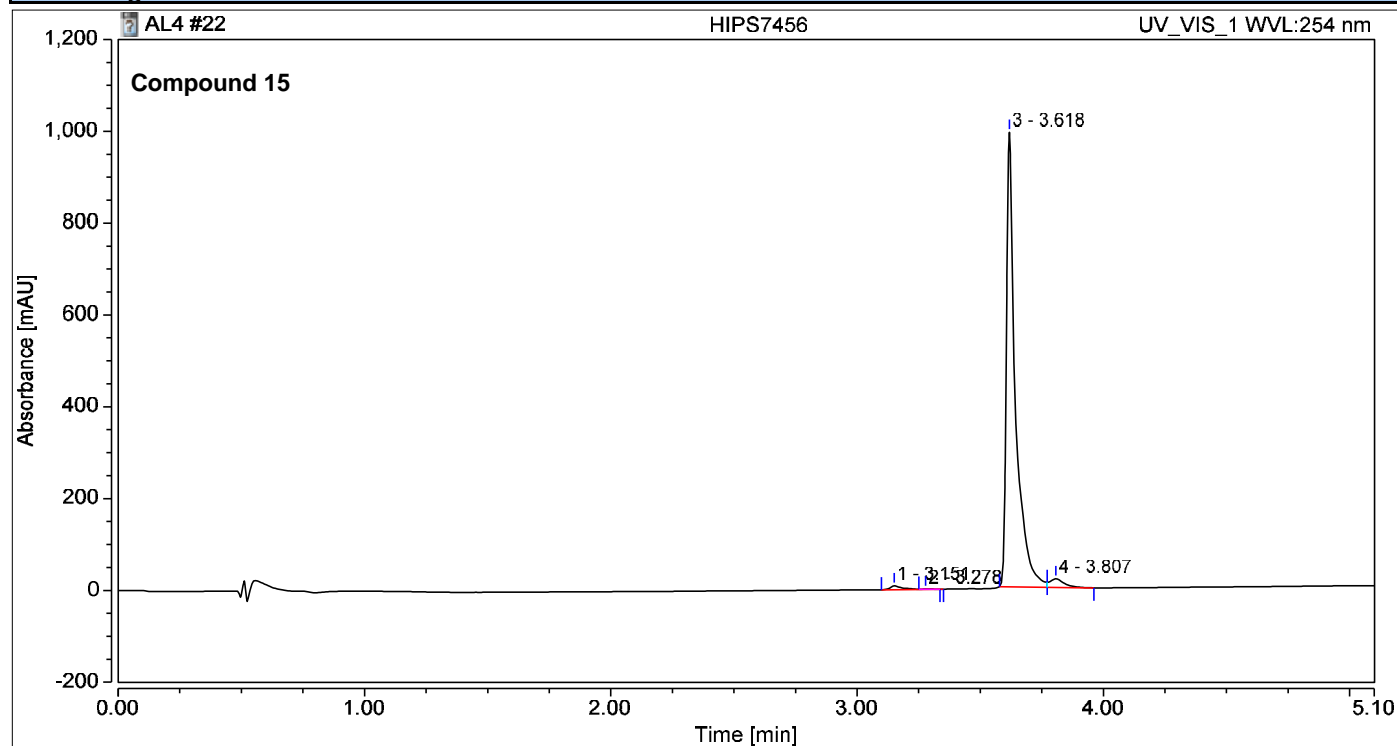

### Integration Results

| No.           | Peak Name | Retention Time<br>min | Area<br>mAU*min | Height<br>mAU   | Relative Area<br>% | Relative Height<br>% | Amount<br>n.a. |
|---------------|-----------|-----------------------|-----------------|-----------------|--------------------|----------------------|----------------|
| 1             |           | 3.151                 | 0.488           | 8.256           | 1.11               | 0.81                 | n.a.           |
| 2             |           | 3.278                 | 0.022           | 0.499           | 0.05               | 0.05                 | n.a.           |
| 3             |           | 3.618                 | 42.133          | 990.229         | 95.94              | 97.27                | n.a.           |
| 4             |           | 3.807                 | 1.274           | 19.071          | 2.90               | 1.87                 | n.a.           |
| <b>Total:</b> |           |                       | <b>43.917</b>   | <b>1018.055</b> | <b>100.00</b>      | <b>100.00</b>        |                |
